# Supplementary material for: Access to cyclohexadiene and benzofuran derivatives via catalytic arene cyclopropanation of α-cyanodiazocarbonyl compounds
Source: Royal Society of Chemistry journal article supplement (doi:10.1039/d4ob00696h), 2024-01-01
Supplement: d4ob00696h1.pdf [file d4ob00696h1.pdf]

## Access to Cyclohexadiene and Benzofuran Derivatives via Catalytic Arene Cyclopropanation of $\alpha$ -Cyanodiazocarbonyl Compounds

Mei-Lin Chen, Chi-wen Chou, Jia-Liang Zhu\* and Ming-Hsuan Tsai

Department of Chemistry, National Dong Hwa University, Hualien 974, Taiwan E-  
mail: jlzhu@gms.ndhu.edu.tw

---

### Supporting Information

|                                                                                                                                                                                   |         |
|-----------------------------------------------------------------------------------------------------------------------------------------------------------------------------------|---------|
| 1) General Remarks.....                                                                                                                                                           | 2       |
| 2) Preparation of Diazo Substrates                                                                                                                                                |         |
| i) Preparation and NMR Spectra of $\alpha$ -Cyanodiazacetates <b>1a-c</b> .....                                                                                                   | 3-12    |
| ii) Preparation and NMR Spectra of $\alpha$ -Diazo- $\beta$ -ketonitriles <b>1h</b> and <b>1i</b> .....                                                                           | 13-20   |
| 3) Preparation and NMR Spectra of Norcaradienes <b>2a-d</b> .....                                                                                                                 | 21-30   |
| 4) Synthesis and $^1\text{H-NMR}$ $^{13}\text{C-NMR}$ , COSY, NOESY Spectra of <b>3a/3a'</b> together with<br>NMR Spectra of ( <i>E</i> )- and ( <i>Z</i> )-Diethyl Fumarate..... | 31-44   |
| 5) Formation and NMR Spectra of <b>3b/4/5</b> .....                                                                                                                               | 45-49   |
| 6) Formation and NMR Spectra of <b>6</b> .....                                                                                                                                    | 50-52   |
| 7) Preparation and NMR Spectra of Bis(cyclopropanated) Adducts <b>3c-j</b> .....                                                                                                  | 53-73   |
| 8) Preparation of <b>7</b> via $\text{SmI}_2$ -promoted Ring-opening of <b>3</b>                                                                                                  |         |
| i) General Procedures.....                                                                                                                                                        | 74      |
| ii) Preparation of <b>7a/7a'</b> and $^1\text{H-NMR}$ $^{13}\text{C-NMR}$ , DEPT, NOESY Spectra.....                                                                              | 74-81   |
| iii) Preparation of <b>7b/7b'</b> and $^1\text{H-NMR}$ $^{13}\text{C-NMR}$ , DEPT Spectra.....                                                                                    | 82-85   |
| iv) Preparation of <b>7c/7c'</b> and $^1\text{H-NMR}$ $^{13}\text{C-NMR}$ , DEPT Spectra.....                                                                                     | 86-90   |
| v) Preparation of <b>7d/7d'</b> and $^1\text{H-NMR}$ $^{13}\text{C-NMR}$ , DEPT Spectra.....                                                                                      | 91-94   |
| vi) Preparation of <b>7e/7e'</b> and $^1\text{H-NMR}$ $^{13}\text{C-NMR}$ , DEPT Spectra.....                                                                                     | 95-98   |
| vii) Preparation of <b>7f/7f'</b> and $^1\text{H-NMR}$ $^{13}\text{C-NMR}$ , DEPT Spectra.....                                                                                    | 99-102  |
| viii) Preparation of <b>7g/7g'</b> and $^1\text{H-NMR}$ $^{13}\text{C-NMR}$ , DEPT Spectra.....                                                                                   | 103-106 |
| ix) Preparation of <b>7h/7h'</b> and $^1\text{H-NMR}$ $^{13}\text{C-NMR}$ , DEPT Spectra .....                                                                                    | 107-112 |
| 9) Formation of Dihydrobenzofurans <b>8a-c</b>                                                                                                                                    |         |
| i) Formation of <b>8a</b> and $^1\text{H-NMR}$ $^{13}\text{C-NMR}$ , DEPT, NOESY Spectra.....                                                                                     | 113-116 |
| ii) Formation of <b>8b</b> and $^1\text{H-NMR}$ , $^{13}\text{C-NMR}$ Spectra.....                                                                                                | 117-119 |
| iii) Formation of <b>8c</b> and $^1\text{H-NMR}$ $^{13}\text{C-NMR}$ , DEPT Spectra.....                                                                                          | 120-123 |
| 10) $^1\text{H NMR}$ Analysis of the Reaction of <b>1h</b> with Benzene .....                                                                                                     | 124     |
| 11) Conversion of <b>8a</b> into <b>9</b> and $^1\text{H-NMR}$ , $^{13}\text{C-NMR}$ Spectra.....                                                                                 | 125-127 |
| 12) Oxidation of <b>8a/8b</b> into <b>10a/10b</b> and $^1\text{H-NMR}$ , $^{13}\text{C-NMR}$ Spectra.....                                                                         | 128-132 |
| References.....                                                                                                                                                                   | 133     |

## 1) General remarks

Dichloromethane, benzene, toluene and tetrahydrofuran were properly dried (CH<sub>2</sub>Cl<sub>2</sub>/benzene/toluene with CaH<sub>2</sub> and THF with Na) and freshly distilled before each use. Acetonitrile (HPLC-grade) was stored with 3Å molecular sieve in a dry box before usage. Other chemicals purchased from commercial sources were used as received without further purification. All reactions were carried out under a N<sub>2</sub> atmosphere, monitored by thin-layer chromatography on 0.25 mm silica plates (60F-254), and visualized with UV light, ethanolic solution of vanillin (5%) or aqueous KMnO<sub>4</sub> solution (10%). Chromatographic separation was performed with 70-230 mesh silica gel or basic aluminum oxide. 7-Cyanonorcaradienyl esters **2a-d** or bis(cyclopropanated) adducts **3a/3a'/3c-j** were purified over Et<sub>3</sub>N-deactivated silica gel by pre-eluting the silica gel column with 2% triethylamine in hexane (100 mL for 50 g of silica gel) followed by pure hexane (50 mL). The <sup>1</sup>H and <sup>13</sup>C NMR spectra were recorded in CDCl<sub>3</sub> or C<sub>6</sub>D<sub>6</sub> at 300 K on a Bruker 400 or an Agilent Technologies 600 MHz Fourier transform spectrometer. The <sup>1</sup>H NMR data are reported as the chemical shift in parts per million (ppm), multiplicity (s, singlet; d, doublet; t, triplet; q, quartet; m, multiplet), coupling constants (*J*) in Hertz, and number of protons. The resonances of infrared (IR) spectra are reported in wave numbers (cm<sup>-1</sup>). Mass spectra were determined in electron impact (EI) ionization mode (70 eV) with magnetic sector analyzer. Crystal crystallographic data of compounds **3c**, **3f** and **3h** have been deposited in the Cambridge Crystallographic Data Centre with the deposition numbers CCDC 2348559, 2348853 and 2348856.

## 2) Preparation of Diazo Substrates

Ethyl diazoacetate (**1d**) was purchased as a CH<sub>2</sub>Cl<sub>2</sub> solution with the concentration calculated as 9.29 M. Substrates **1e-g** were synthesized according to the procedures in our previous report.<sup>1</sup>

### i) Preparation and NMR Spectra of $\alpha$ -Cyanodiazoacetates **1a-c**

Ethyl 2-cyano-2-diazoacetate (**1a**)<sup>2</sup>

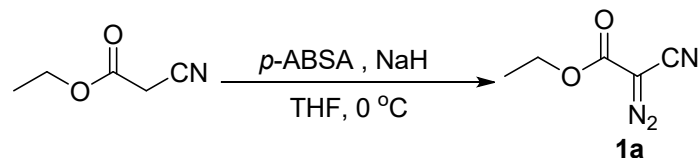

A solution of ethyl cyanoacetate (300 mg, 98%, 0.29 mL, 2.65 mmol) in THF (20 mL, 0.1326 M) was stirred in an ice bath for 1 h followed by the addition of NaH (127.2 mg, 60%, 3.18 mmol) in one portion. After stirring for an additional 3 min, 4-acetamidobenzenesulfonyl azide (*p*-ABSA, 1.95 g, 98%, 7.96 mmol) was introduced, and the mixture was continuously stirred in the ice bath for 15 min before quenched by slowly adding 2 mL of water. The resulting suspension was diluted with CH<sub>2</sub>Cl<sub>2</sub> (300 mL) and successively washed with saturated NH<sub>4</sub>Cl aqueous solution (70 mL), water (70 mL) and brine (70 mL). The organic layer was separated and concentrated under reduced pressure. The crude residue was subjected to chromatographic purification (silica gel; hexane/ethyl acetate = 6:1, 3:1) to give **1a** as a colorless oil (181 mg, 49%). <sup>1</sup>H NMR (400 MHz, CDCl<sub>3</sub>)  $\delta$  4.33 (q, *J* = 7.1 Hz, 2 H), 1.32 (t, *J* = 7.1 Hz, 3 H) ppm; <sup>13</sup>C NMR (100 MHz, CDCl<sub>3</sub>)  $\delta$  161.2 (C=O), 107.3 (C $\equiv$ N), 63.4 (CH<sub>2</sub>), 51.1 (C=N<sub>2</sub>), 14.2 (CH<sub>3</sub>) ppm.

Methyl 2-cyano-2-diazoacetate (**1b**)<sup>3</sup>

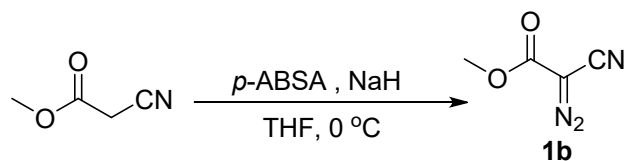

The titled compound was synthesized from methyl cyanoacetate following the procedure for the preparation of **1a**. Chromatographic purification (silica gel; hexane/ethyl acetate = 6:1) afforded **1b** as a yellow oil (40%). <sup>1</sup>H NMR (400 MHz, CDCl<sub>3</sub>)  $\delta$  3.88 (s, 3 H) ppm; <sup>13</sup>C NMR (100 MHz, CDCl<sub>3</sub>)  $\delta$  161.6 (C=O), 107.2 (C $\equiv$ N), 53.8 (CH<sub>3</sub>), 51.2 (C=N<sub>2</sub>) ppm.

*t*-Butyl 2-cyano-2-diazoacetate (**1c**)<sup>2</sup>

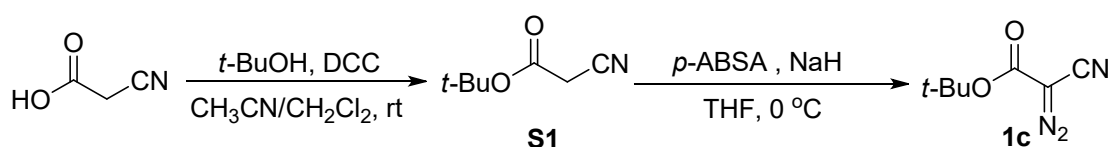

To a stirred mixture of 2-cyanoacetic acid (500 mg, 5.88 mmol) and *t*-butyl alcohol (0.7 mL, 7.34 mmol) in CH<sub>3</sub>CN (5.9 mL), a solution of *N,N*-dicyclohexylcarbodiimide (1.35 g, 99%, 6.47 mmol) in CH<sub>2</sub>Cl<sub>2</sub> (6.5 mL) was added via a syringe over 5 min. After stirring for an additional 40 min, the resulting white suspension was directly loaded on silica gel column and eluted with hexane-ethyl acetate (6:1, 3:1) to give *tert*-butyl 2-cyanoacetate<sup>4</sup> (**S1**) as a yellow oil (689.7 mg, 83%). <sup>1</sup>H NMR (400 MHz, CDCl<sub>3</sub>) δ 3.36 (s, 2 H), 1.48 (s, 9 H) ppm; <sup>13</sup>C NMR (100 MHz, CDCl<sub>3</sub>) δ 161.8 (C=O), 113.5 (C≡N), 84.3(C-O), 27.7 (CH<sub>3</sub>), 25.8 (CH<sub>2</sub>) ppm.

Compound **1c** was synthesized from **S1** following the procedure for the preparation of **1a**. Chromatographic purification (silica gel; hexane/ethyl acetate = 40:1, 35:1, 10:1) afforded **1c** as a yellow oil (40%). <sup>1</sup>H NMR (400 MHz, CDCl<sub>3</sub>) δ 1.52 (s, 9 H) ppm; <sup>13</sup>C NMR (100 MHz, CDCl<sub>3</sub>) δ 160.0 (C=O), 107.8 (C≡N), 85.5 (C-O), 51.2 (C=N<sub>2</sub>), 28.0 (CH<sub>3</sub>) ppm.



Current Data Parameters  
NAME zhu-11  
EXPNO 1  
PROCNO 1

F2 - Acquisition Parameters  
Date\_ 20220927  
Time 13.09  
INSTRUM spect  
PROBHD 5 mm QNP 1H/13  
PULPROG zg30  
TD 32768  
SOLVENT CDCl3  
NS 80  
DS 0  
SWH 7211.539 Hz  
FIDRES 0.220079 Hz  
AQ 2.2719147 sec  
RG 256  
DW 69.333 usec  
DE 6.50 usec  
TE 294.0 K  
D1 2.00000000 sec  
TD0 1

==== CHANNEL f1 =====  
NUC1 1H  
P1 15.00 usec  
PL1 0.90 dB  
SFO1 400.1336012 MHz  
F2 - Processing parameters  
SI 16384  
SF 400.1300091 MHz  
WDW EM  
SSB 0  
LB 0.30 Hz  
GB 0  
PC 1.00

1.376  
1.3198  
1.3020

4.3525  
4.3348  
4.3170  
4.2990

7.2600

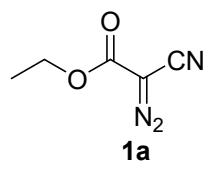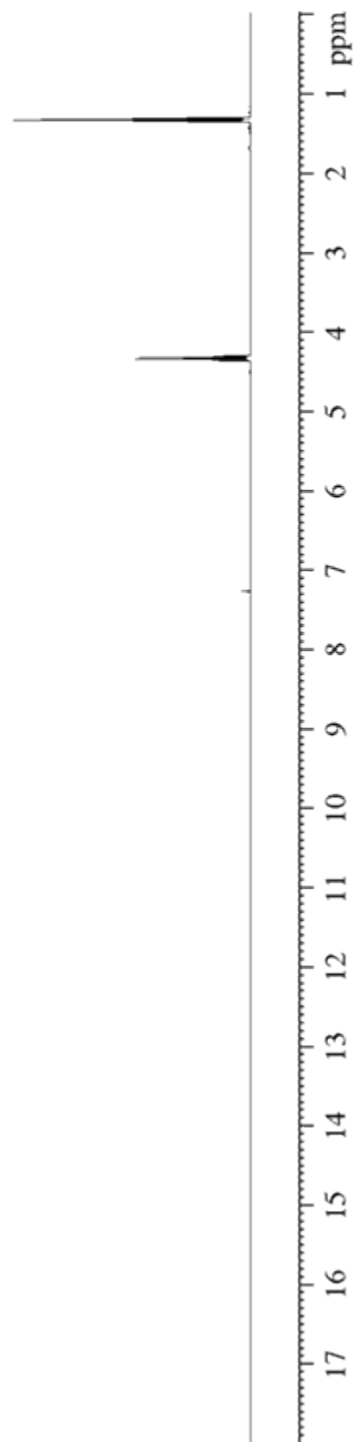

Current Data Parameters  
NAME zhu-11  
EXPNO 2  
PROCNO 1

F2 - Acquisition Parameters  
Date\_ 20220927  
Time 13.17  
INSTRUM spect  
PROBHD 5 mm QNP 1H/13  
PULPROG zgpg30  
TD 65536  
SOLVENT CDCl3  
NS 800  
DS 0  
SWH 25252.525 Hz  
FIDRES 0.385323 Hz  
AQ 1.2976128 sec  
RG 2050  
DW 19.800 usec  
DE 6.50 usec  
TE 294.2 K  
D1 2.00000000 sec  
d11 0.03000000 sec  
DELTA 1.89999998 sec  
TD0 1

===== CHANNEL f1 =====  
NUC1 13C  
P1 10.00 usec  
PL1 6.20 dB  
SFO1 100.6243395 MHz

===== CHANNEL f2 =====  
CPDPRG2 walz16  
NUC2 1H  
PCPD2 90.00 usec  
PL2 -0.40 dB  
PL12 15.80 dB  
PL13 18.50 dB  
SFO2 400.1316005 MHz

F2 - Processing parameters  
SI 32768  
SF 100.6127777 MHz  
WDW EM  
SSB 0  
LB 1.00 Hz  
GB 0  
PC 1.40

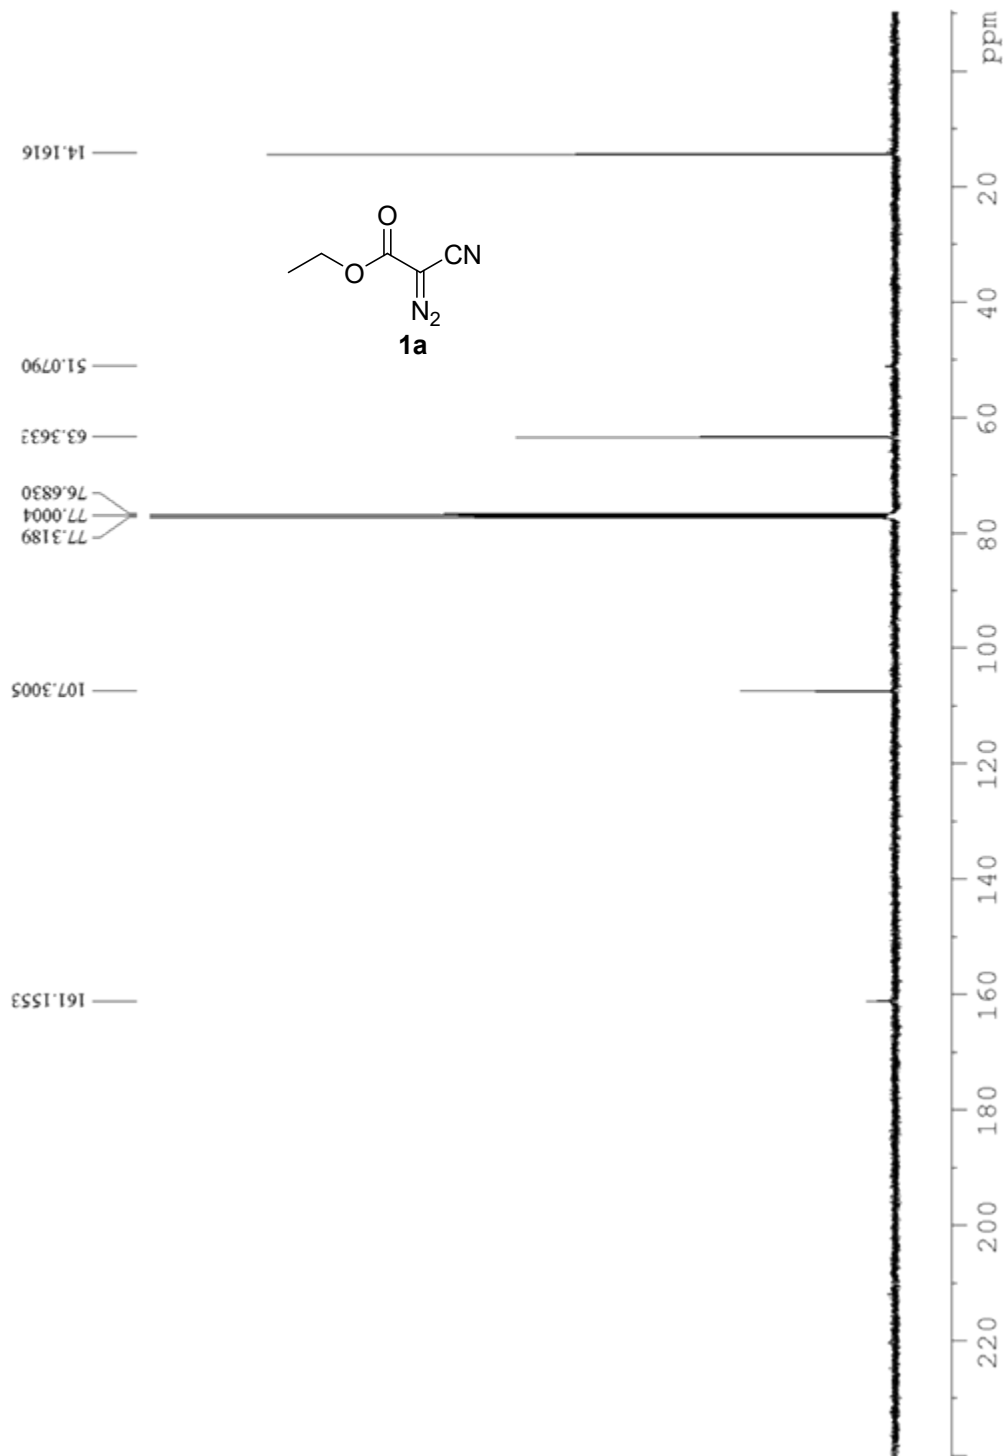

Current Data Parameters  
NAME zhu-79  
EXPNO 1  
PROCNO 1

F2 - Acquisition Parameters  
Date\_ 20230714  
Time 14.27  
INSTRUM spect  
PROBHD 5 mm QNP 1H/13  
PULPROG zg30  
TD 32768  
SOLVENT CDC13  
NS 32  
DS 0  
SWH 7211.539 Hz  
FIDRES 0.220079 Hz  
AQ 2.2719147 sec  
RG 406  
DW 69.333 usec  
DE 6.50 usec  
TE 294.0 K  
D1 2.00000000 sec  
TD0 1

==== CHANNEL f1 =====  
NUC1 1H  
P1 15.00 usec  
PL1 0.90 dB  
SFO1 400.1336012 MHz  
F2 - Processing parameters  
SI 16384  
SF 400.1300094 MHz  
WDW EM  
SSB 0  
LB 0.30 Hz  
GB 0  
PC 1.00

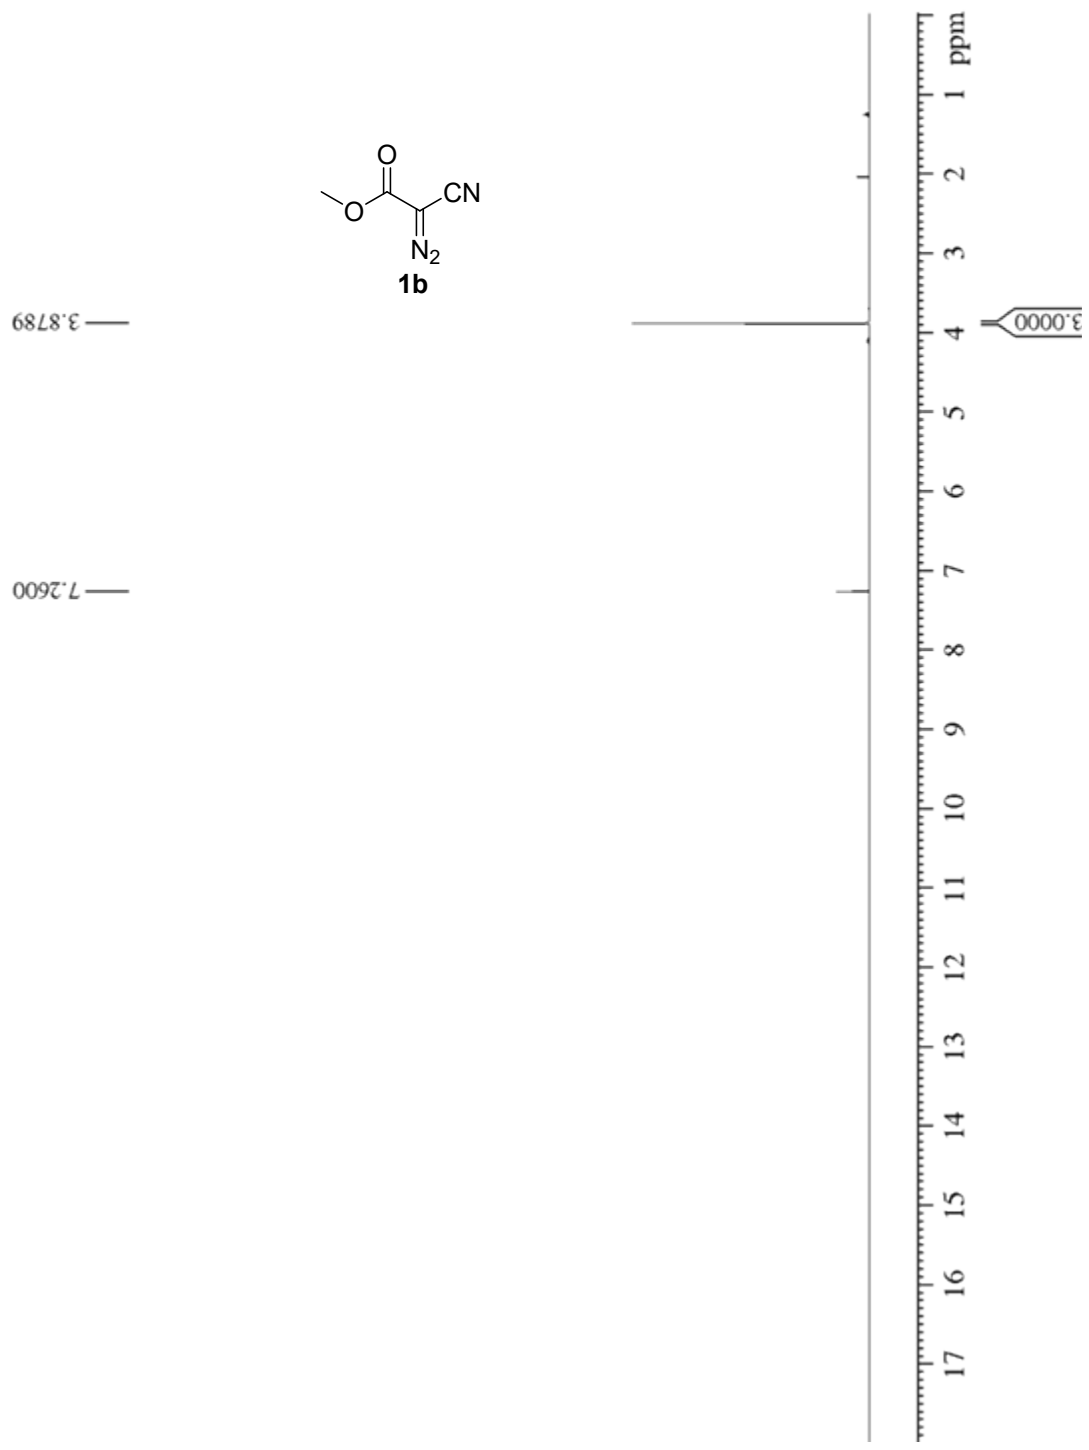

Current Data Parameters  
 NAME zhu-79  
 EXPNO 2  
 PROCNO 1

F2 - Acquisition Parameters  
 Date\_ 20230714  
 Time 14.33  
 INSTRUM spect  
 PROBHD 5 mm QNP 1H/13  
 PULPROG zgpg30  
 TD 65536  
 SOLVENT CDCl3  
 NS 614  
 DS 0  
 SWH 25252.525 Hz  
 FIDRES 0.385323 Hz  
 AQ 1.2976128 sec  
 RG 2050  
 DW 19.800 usec  
 DE 6.50 usec  
 TE 294.2 K  
 D1 2.00000000 sec  
 d11 0.03000000 sec  
 DELTA 1.89999998 sec  
 TD0 1

===== CHANNEL f1 =====  
 NUC1 13C  
 P1 10.00 usec  
 PL1 6.20 dB  
 SFO1 100.6243395 MHz

===== CHANNEL f2 =====  
 CPDPRG2 walz16  
 NUC2 1H  
 PCPD2 90.00 usec  
 PL2 -0.40 dB  
 PL12 15.80 dB  
 PL13 18.50 dB  
 SFO2 400.1316005 MHz

F2 - Processing parameters  
 SI 32768  
 SF 100.6127757 MHz  
 WDW EM  
 SSB 0  
 LB 1.00 Hz  
 GB 0  
 PC 1.40

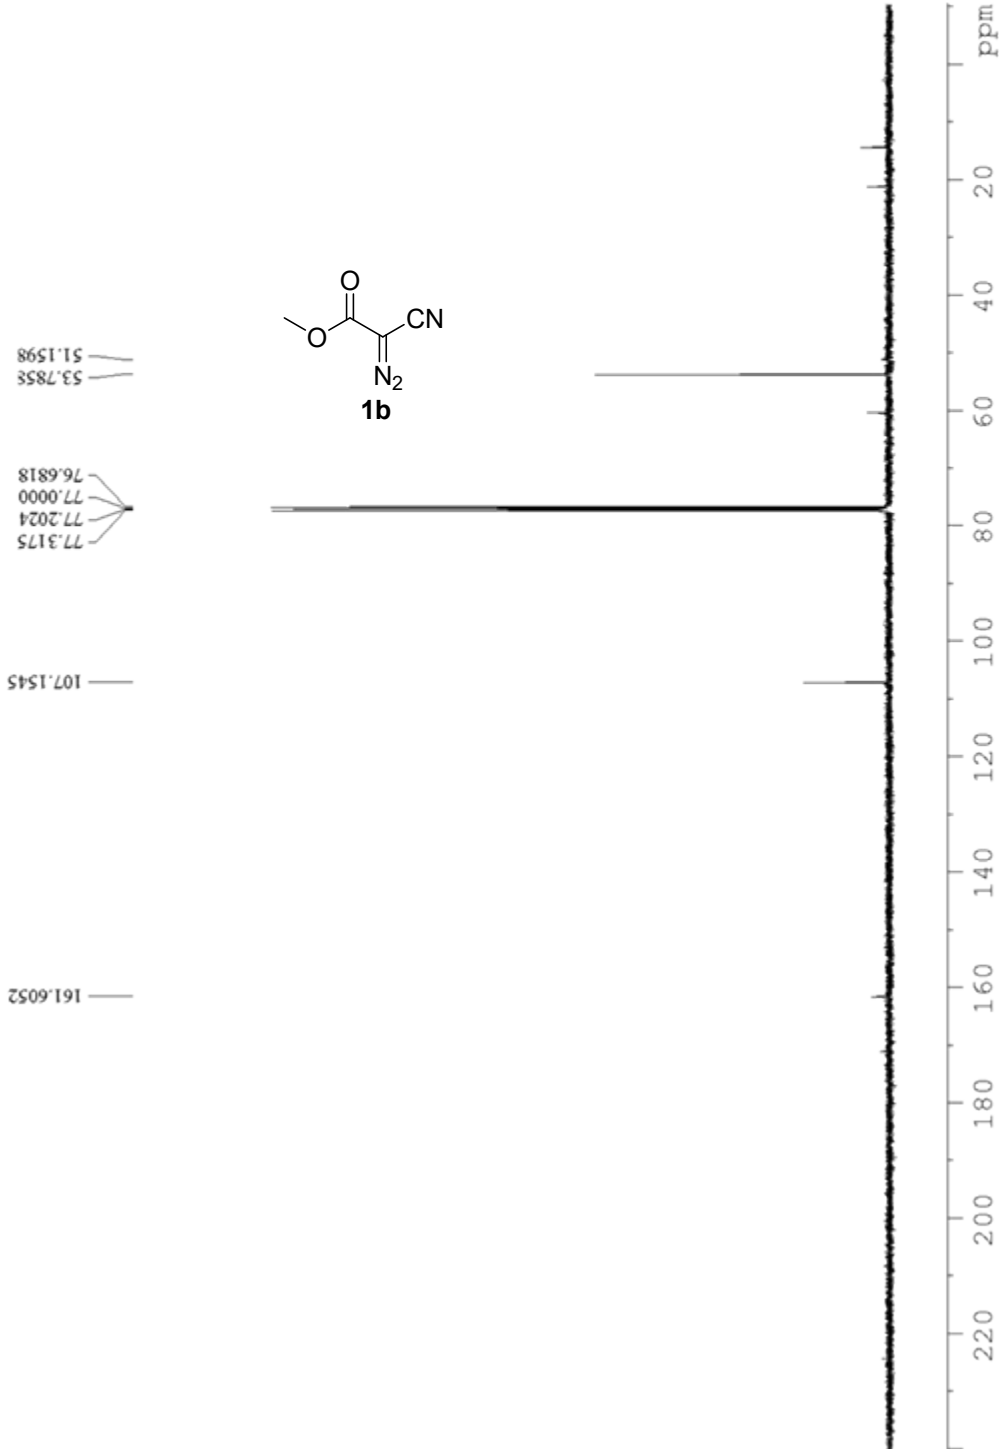

Current Data Parameters  
NAME zhu-19  
EXPNO 1  
PROCNO 1

F2 - Acquisition Parameters  
Date\_ 20221104  
Time 11.55  
INSTRUM spect  
PROBHD 5 mm QNP 1H/13  
PULPROG zg30  
TD 32768  
SOLVENT CDCl3  
NS 40  
DS 0  
SWH 7211.539 Hz  
FIDRES 0.220079 Hz  
AQ 2.2719147 sec  
RG 101  
DW 69.333 usec  
DE 6.50 usec  
TE 292.0 K  
D1 2.00000000 sec  
TD0 1

==== CHANNEL f1 =====  
NUC1 1H  
P1 15.00 usec  
PL1 0.90 dB  
SFO1 400.1336012 MHz

F2 - Processing parameters  
SI 16384  
SF 400.1300094 MHz  
WDW EM  
SSB 0  
LB 0.30 Hz  
GB 0  
PC 1.00

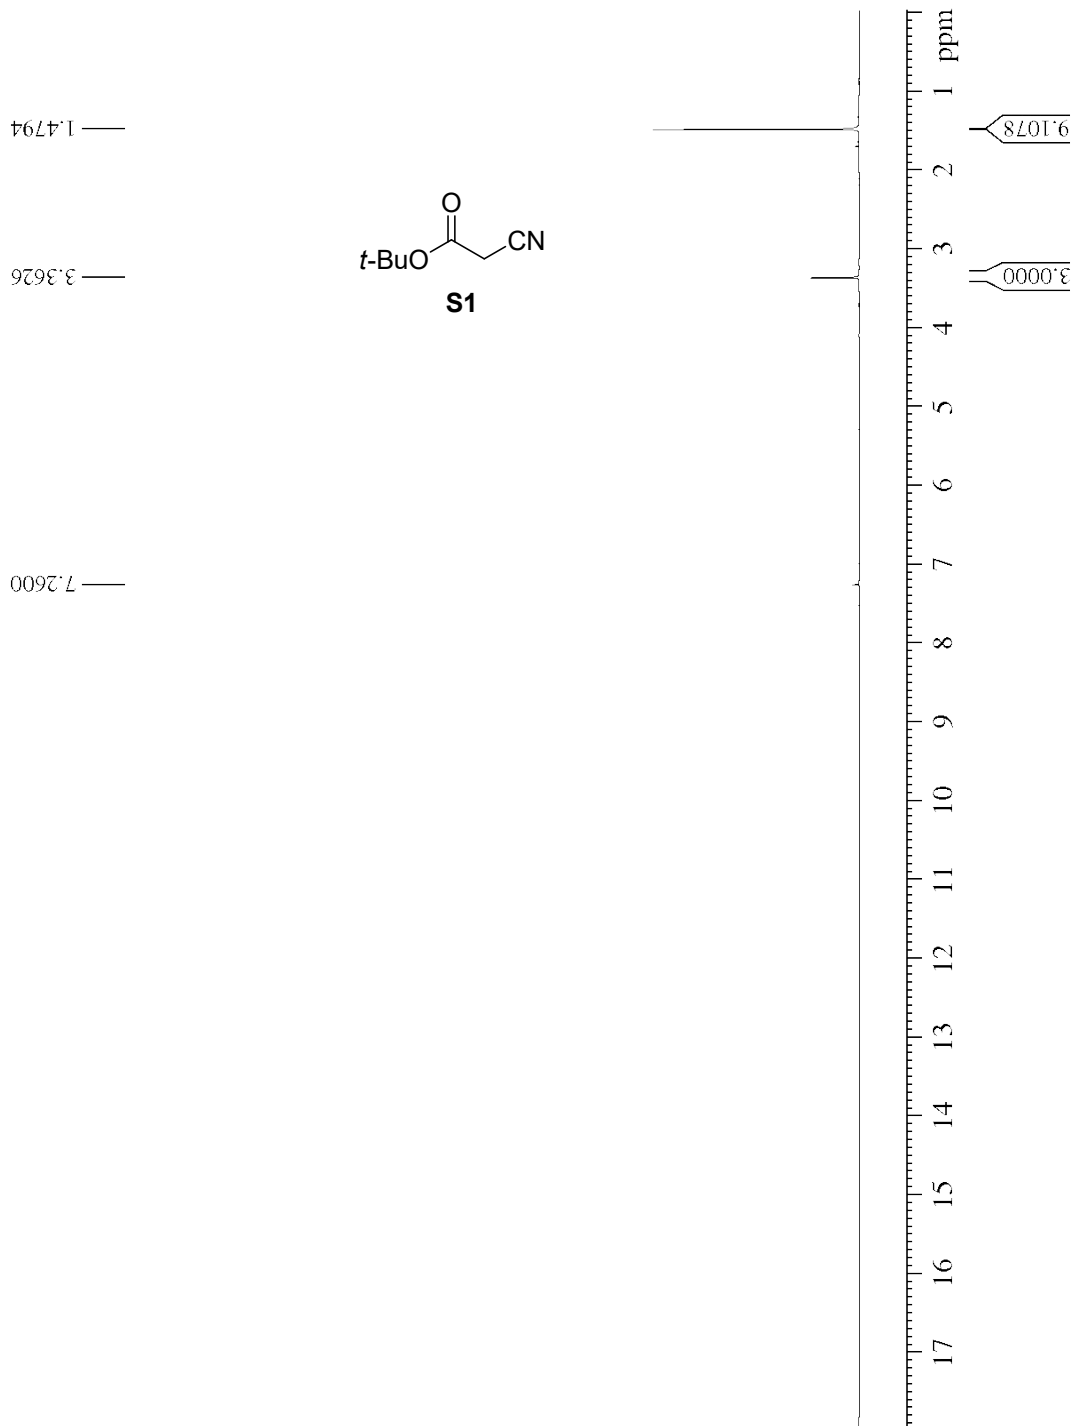

Current Data Parameters  
 NAME zhu-19  
 EXPNO 2  
 PROCNO 1

F2 - Acquisition Parameters  
 Date\_ 20221104  
 Time 11:59  
 INSTRUM spect  
 PROBHD 5 mm QNP 1H/13  
 PULPROG zgpg30  
 TD 65536  
 SOLVENT CDCl3  
 NS 400  
 DS 0  
 SWH 25252.525 Hz  
 FIDRES 0.385323 Hz  
 AQ 1.29776128 sec  
 RG 2050  
 DW 19.800 usec  
 DE 6.50 usec  
 TE 292.1 K  
 D1 2.00000000 sec  
 d11 0.03000000 sec  
 DELTA 1.89999998 sec  
 TD0 1

==== CHANNEL f1 =====  
 NUC1 13C  
 P1 10.00 usec  
 PL1 6.20 dB  
 SFO1 100.6213395 MHz

==== CHANNEL f2 =====  
 CPDPRG2 waltz16  
 NUC2 1H  
 PCPD2 90.00 usec  
 PL2 -0.40 dB  
 PL12 15.80 dB  
 PL13 18.50 dB  
 SFO2 400.1316005 MHz

F2 - Processing parameters  
 SI 32768  
 SF 100.6127779 MHz  
 WDWH EM  
 SSB 0  
 LB 1.00 Hz  
 GB 0  
 PC 1.40

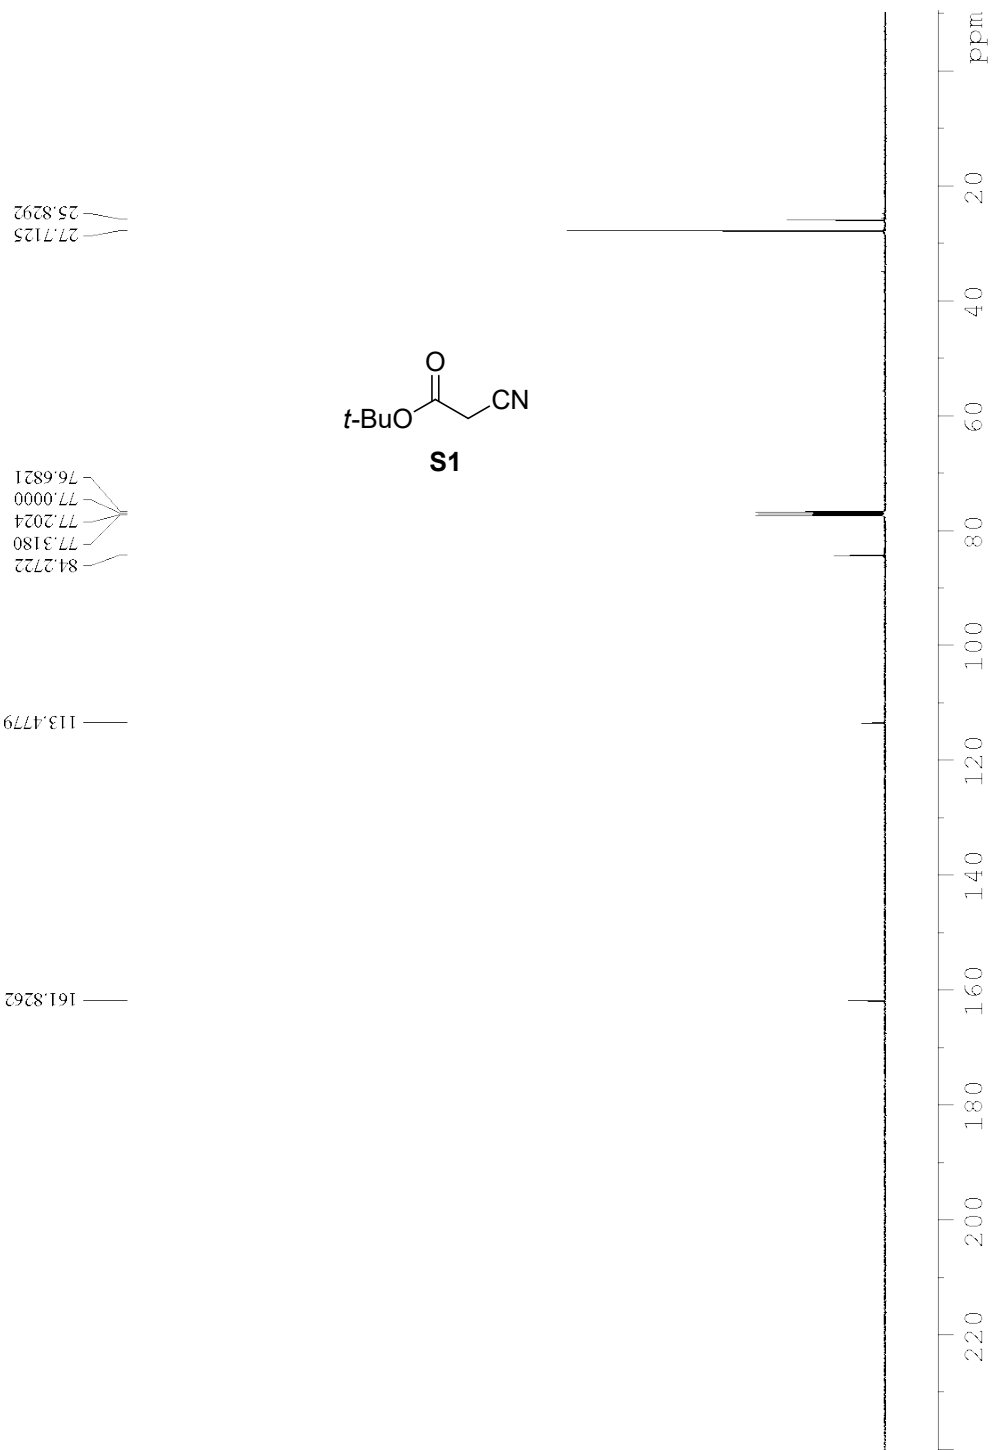

Current Data Parameters  
NAME zhu-21-1  
EXPNO 1  
PROCNO 1

F2 - Acquisition Parameters  
Date\_ 20221121  
Time 12:09  
INSTRUM spect  
PROBHD 5 mm QNP 1H/13  
PULPROG zg30  
TD 32768  
SOLVENT CDCl3  
NS 80  
DS 0  
SWH 7211.539 Hz  
FIDRES 0.220079 Hz  
AQ 2.2719147 sec  
RG 228  
DW 69.333 usec  
DE 6.50 usec  
TE 292.4 K  
D1 2.00000000 sec  
TD0 1

==== CHANNEL f1 =====

NUC1 1H  
P1 15.00 usec  
PL1 0.90 dB  
SFO1 400.1336012 MHz

F2 - Processing parameters  
SI 16384  
SF 400.1300092 MHz  
WDW EM  
SSB 0  
LB 0.30 Hz  
GB 0  
PC 1.00

— 1.5165

— 7.2601

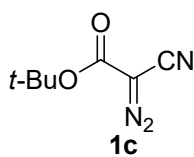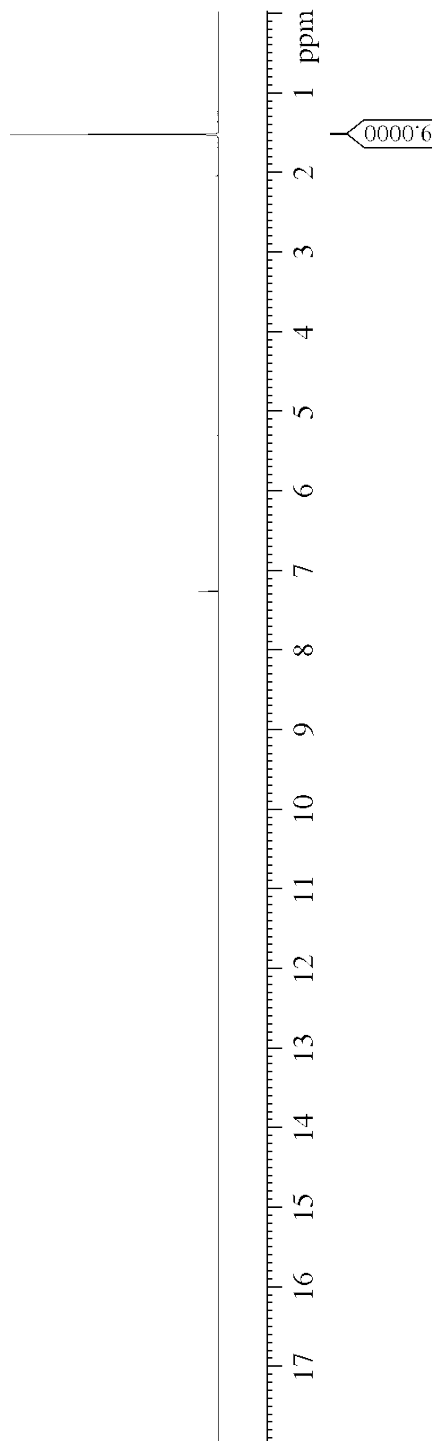

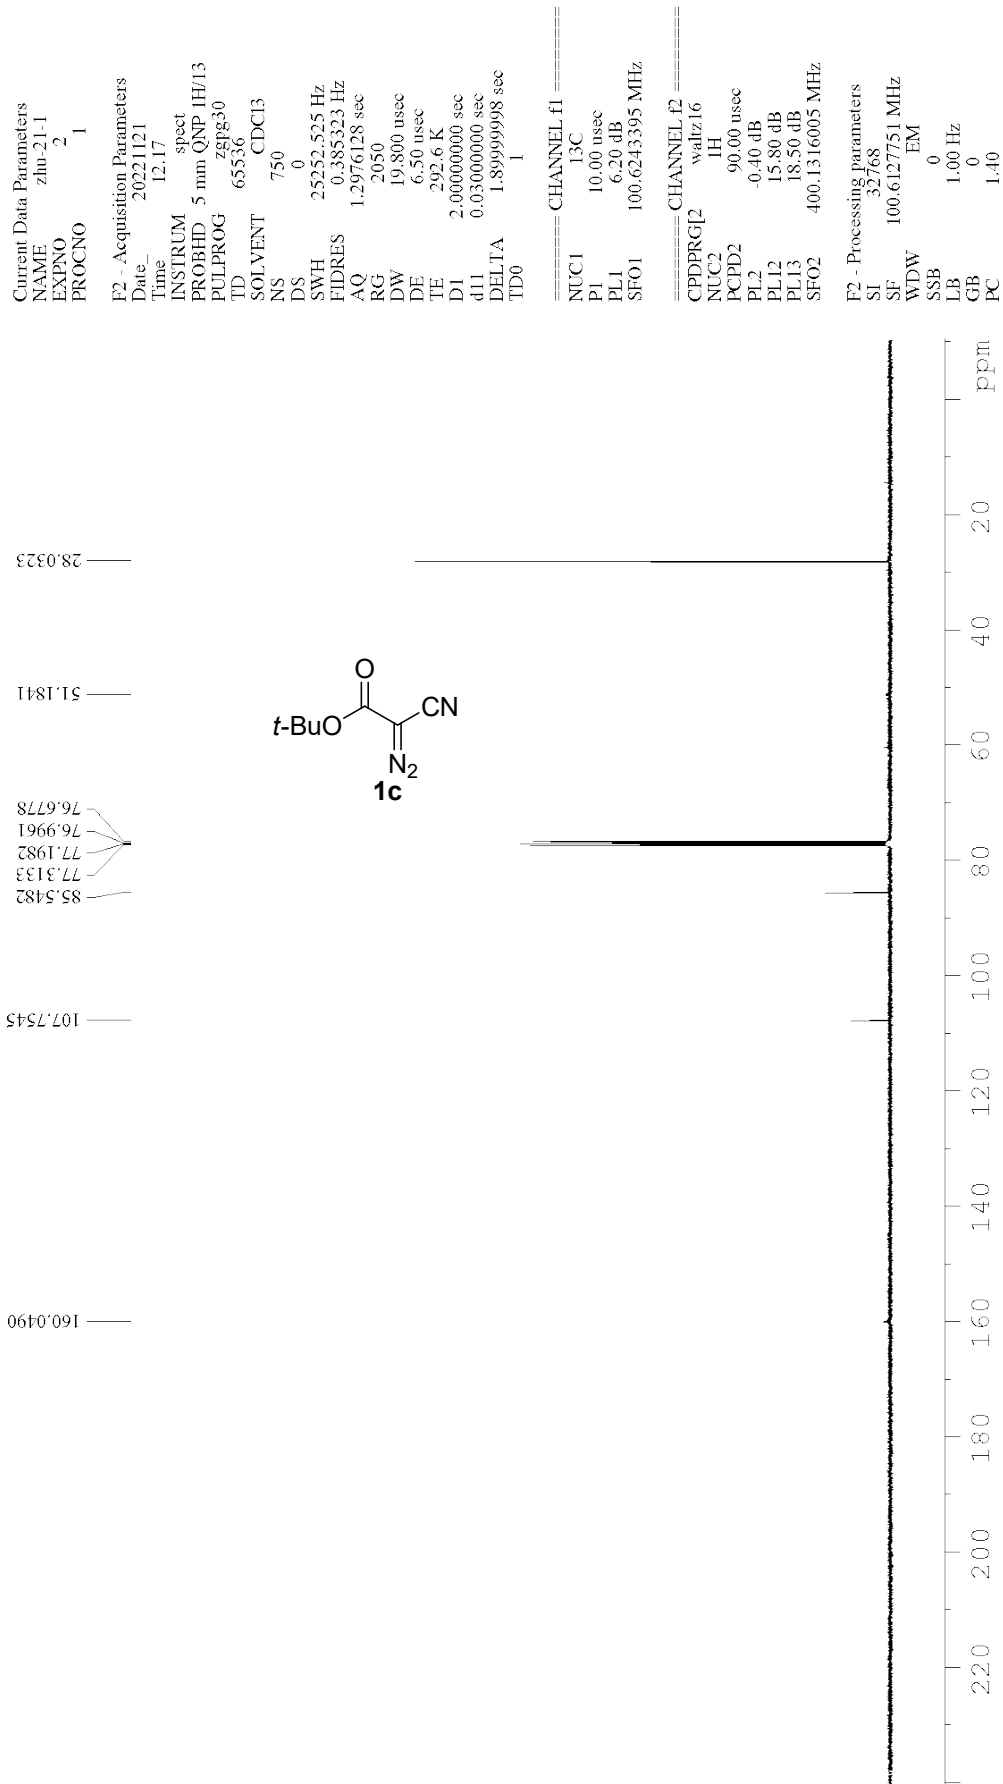



ii) Preparation and NMR Spectra of  $\alpha$ -Diazo- $\beta$ -ketonitriles **1h** and **1i** 2-Diazo-3-oxo-3-phenylpropanenitrile (**1h**)<sup>2</sup>

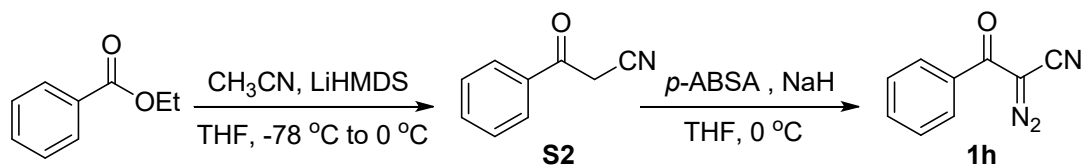

A flame-dried flask equipped with a stir bar was charged with THF (11 mL) and LiHMDS (1M in THF, 11.7 mL, 11.7 mmol). The solution was stirred at  $-78\text{ }^\circ\text{C}$  for 40 min followed by the addition of  $\text{CH}_3\text{CN}$  (0.72 mL, 13.85 mmol) in one portion. After stirring for an additional 30 min, a solution of ethyl benzoate (800 mg, 5.33 mmol) in THF (33 mL) was dropwise added via a syringe pump over 10 min. The reaction mixture was allowed to warm to  $0\text{ }^\circ\text{C}$  in 1 h, then diluted by ethyl acetate (400 mL) and washed with saturated  $\text{NH}_4\text{Cl}$  aqueous solution (100 mL), water (100 mL) and brine (100 mL). The organic layer was separated and concentrated under reduced pressure. The residue was subjected to column chromatography (silica gel; hexane/ethyl acetate = 10:1, 3:1) to afford 3-oxo-3-phenylpropanenitrile<sup>5</sup> (**S2**) as a white solid (813 mg, quant.).  $^1\text{H}$  NMR (400 MHz,  $\text{CDCl}_3$ )  $\delta$  7.92 (d,  $J = 7.8$  Hz, 2 H), 7.67 (t,  $J = 7.3$  Hz, 1 H), 7.53 (t,  $J = 7.7$  Hz, 2 H), 4.10 (s, 2 H) ppm;  $^{13}\text{C}$  NMR (100 MHz,  $\text{CDCl}_3$ )  $\delta$  187.1 (C=O), 134.7, 134.2, 129.1, 128.4, 113.8 (C $\equiv$ N), 29.4 ( $\text{CH}_2$ ) ppm.

A solution of **S2** (567.4 mg, 3.91 mmol) in THF (29.2 mL, 0.1326 M) was stirred in an ice bath for 1 h followed by the introduction of  $p\text{-ABSA}$  (2.87 g, 98%, 11.73 mmol). After stirring for 5 min,  $\text{NaH}$  (187.6 mg, 60%, 4.69 mmol) was added in two portions at 5 min interval (first 100 mg then 87.6 mg). The reaction mixture was stirred in the ice bath for an additional 6 min before quenched by adding 5 mL of water. The resulting suspension was diluted by  $\text{CH}_2\text{Cl}_2$  (400 mL) and washed with saturated  $\text{NH}_4\text{Cl}$  aqueous solution (80 mL), water (80 mL) and brine (80 mL). After concentration, the residue was subjected to chromatographic purification (silica gel; hexane/ethyl acetate = 5:1) to give **1h** as a yellow solid (231 mg, 34%).  $^1\text{H}$  NMR (400 MHz,  $\text{CDCl}_3$ )  $\delta$  7.87 (d,  $J = 7.3$  Hz, 2 H), 7.62 (t,  $J = 7.5$  Hz, 1 H), 7.50 (t,  $J = 7.9$  Hz, 2 H) ppm;  $^{13}\text{C}$  NMR (100 MHz,  $\text{CDCl}_3$ )  $\delta$  182.9 (C=O), 134.5, 133.8, 128.8, 128.0, 109.1 (C $\equiv$ N), 58.9 (C=N $_2$ ) ppm.

2-Diazo-3-oxobutanenitrile (**1i**)<sup>6</sup>

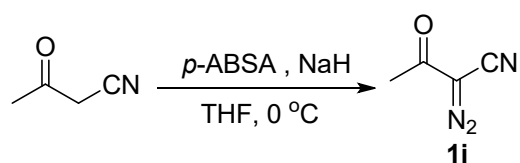

The titled compound was synthesized from commercially available 3-oxobutanenitrile following the procedure for the preparation of **1h**. Chromatographic purification

(silica gel; hexane/ethyl acetate = 3:1) gave **1i** in 21% yield as a yellow oil.  $^1\text{H}$  NMR (400 MHz,  $\text{CDCl}_3$ )  $\delta$  2.34 (s, 3 H) ppm;  $^{13}\text{C}$  NMR (100 MHz,  $\text{CDCl}_3$ )  $\delta$  187.3 (C=O), 108.5 (C $\equiv$ N), 57.9 (C=N $_2$ ), 26.6 (CH $_3$ ) ppm.

Current Data Parameters  
NAME zhu-28  
EXPNO 1  
PROCNO 1

F2 - Acquisition Parameters  
Date\_ 20221215  
Time 15.23  
INSTRUM spect  
PROBHD 5 mm QNP 1H/13  
PULPROG zg30  
TD 32768  
SOLVENT CDCl3  
NS 40  
DS 0  
SWH 7211.539 Hz  
FIDRES 0.220079 Hz  
AQ 2.2719147 sec  
RG 456  
DW 69.333 usec  
DE 6.50 usec  
TE 290.8 K  
D1 2.00000000 sec  
TD0 1

==== CHANNEL f1 =====  
NUC1 1H  
P1 15.00 usec  
PL1 0.90 dB  
SFO1 400.1336012 MHz

F2 - Processing parameters  
SI 16384  
SF 400.1300096 MHz  
WDW EM  
SSB 0  
LB 0.30 Hz  
GB 0  
PC 1.00

4.107

7.9340  
7.9145  
7.6886  
7.6704  
7.6516  
7.5508  
7.5316  
7.5122  
7.2600

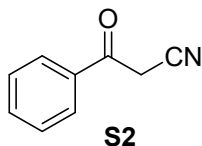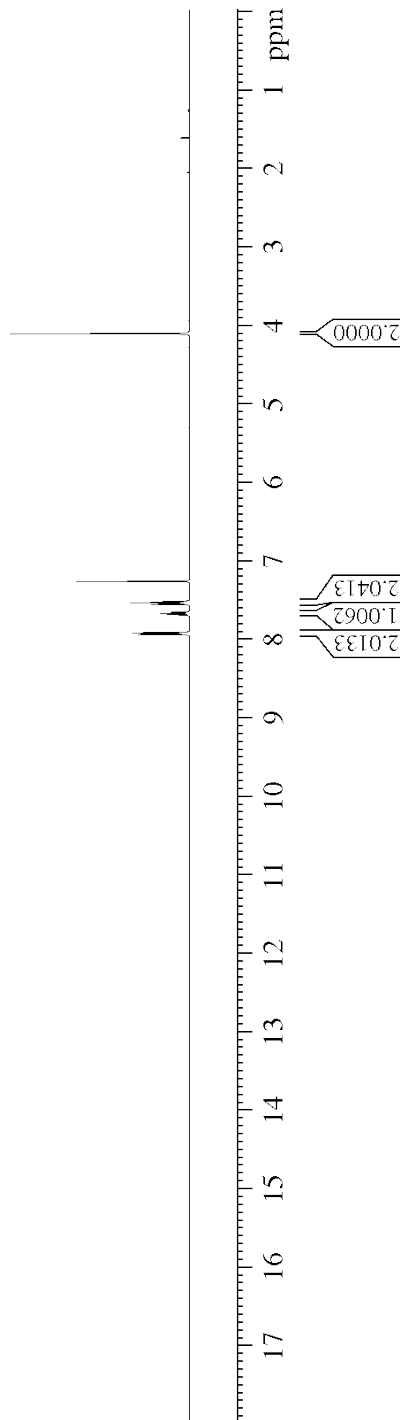

Current Data Parameters  
NAME zhu-28  
EXPNO 2  
PROCNO 1

F2 - Acquisition Parameters  
Date\_ 20221215  
Time 15:25  
INSTRUM spect  
PROBHD 5 mm QNP 1H/13  
PULPROG zgpg30  
TD 65536  
SOLVENT CDCl3  
NS 450  
DS 0  
SWH 25252.525 Hz  
FIDRES 0.385323 Hz  
AQ 1.2976128 sec  
RG 2050  
DW 19.800 usec  
DE 6.50 usec  
TE 290.9 K  
D1 2.00000000 sec  
d11 0.03000000 sec  
DELTA 1.89999998 sec  
TD0 1

==== CHANNEL f1 =====  
NUC1 13C  
P1 10.00 usec  
PL1 6.20 dB  
SFO1 100.6243395 MHz

==== CHANNEL f2 =====  
CPDPRG2 waltz16  
NUC2 1H  
PCPD2 90.00 usec  
PL2 -0.40 dB  
PL12 15.80 dB  
PL13 18.50 dB  
SFO2 400.1316005 MHz

F2 - Processing parameters  
SI 32768  
SF 100.6127755 MHz  
WDW EM  
SSB 0  
LB 1.00 Hz  
GB 0  
PC 1.40

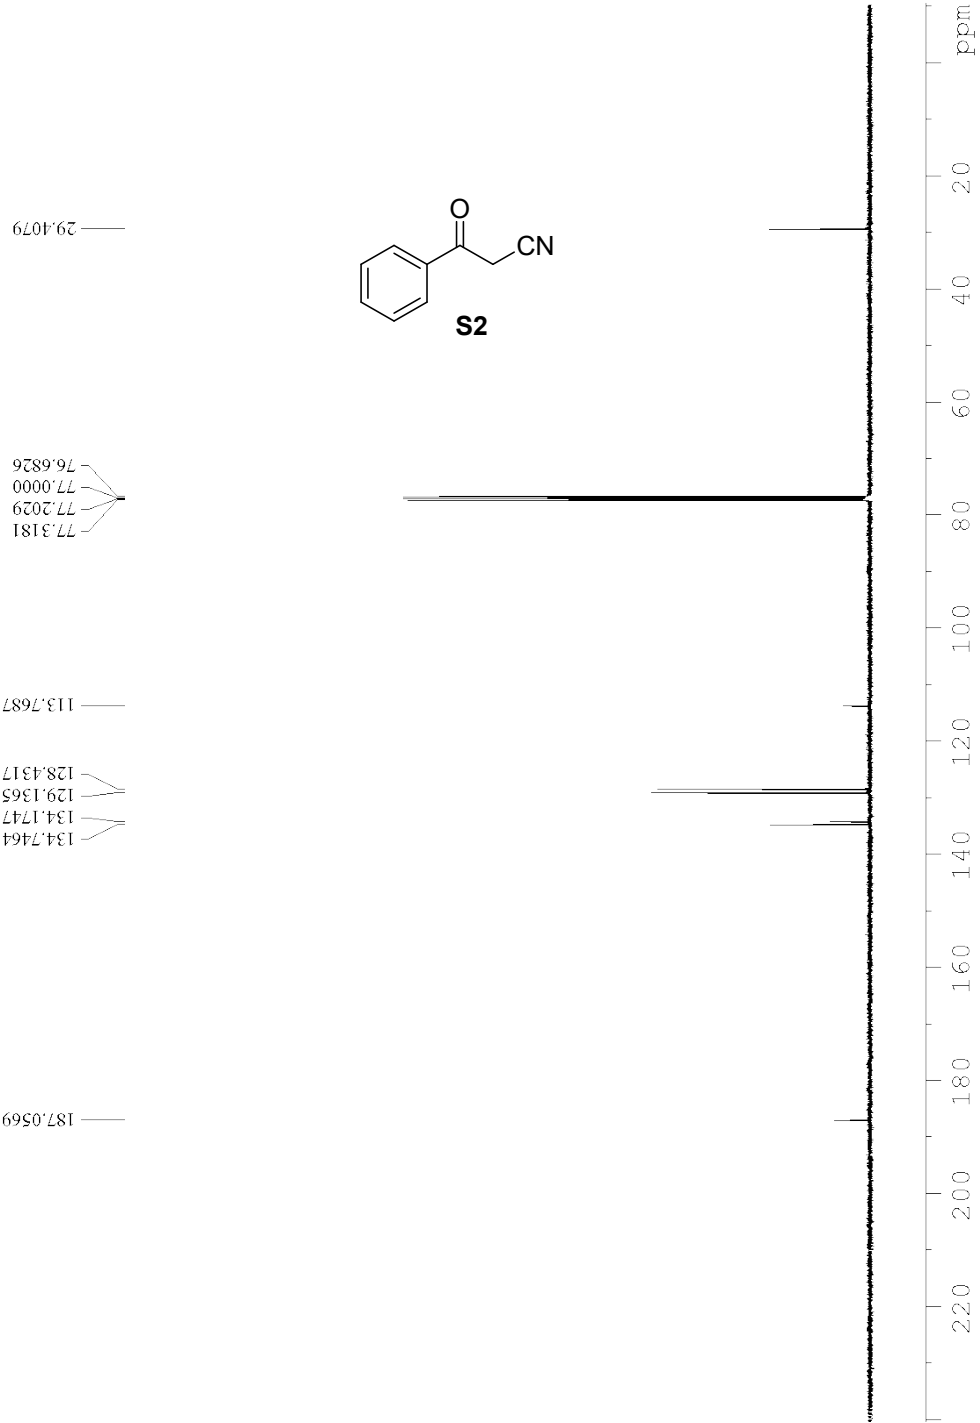

Current Data Parameters  
NAME zhu-29  
EXPNO 1  
PROCNO 1

F2 - Acquisition Parameters  
Date\_ 20221220  
Time 13:33  
INSTRUM spect  
PROBHD 5 mm QNP 1H/13  
PULPROG zg30  
TD 32768  
SOLVENT CDC13  
NS 40  
DS 0  
SWH 7211.539 Hz  
FIDRES 0.220079 Hz  
AQ 2.2719147 sec  
RG 287  
DW 69.333 usec  
DE 6.50 usec  
TE 291.0 K  
D1 2.00000000 sec  
TD0 1

===== CHANNEL f1 =====  
NUC1 1H  
P1 15.00 usec  
PL1 0.90 dB  
SFO1 400.1336012 MHz

F2 - Processing parameters  
SI 16384  
SF 400.1300097 MHz  
WDW EM  
SSB 0  
LB 0.30 Hz  
GB 0  
PC 1.00

7.8848  
7.8666  
7.8638  
7.8351  
7.6167  
7.5980  
7.5178  
7.4981  
7.4792  
7.2600

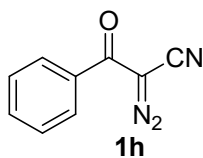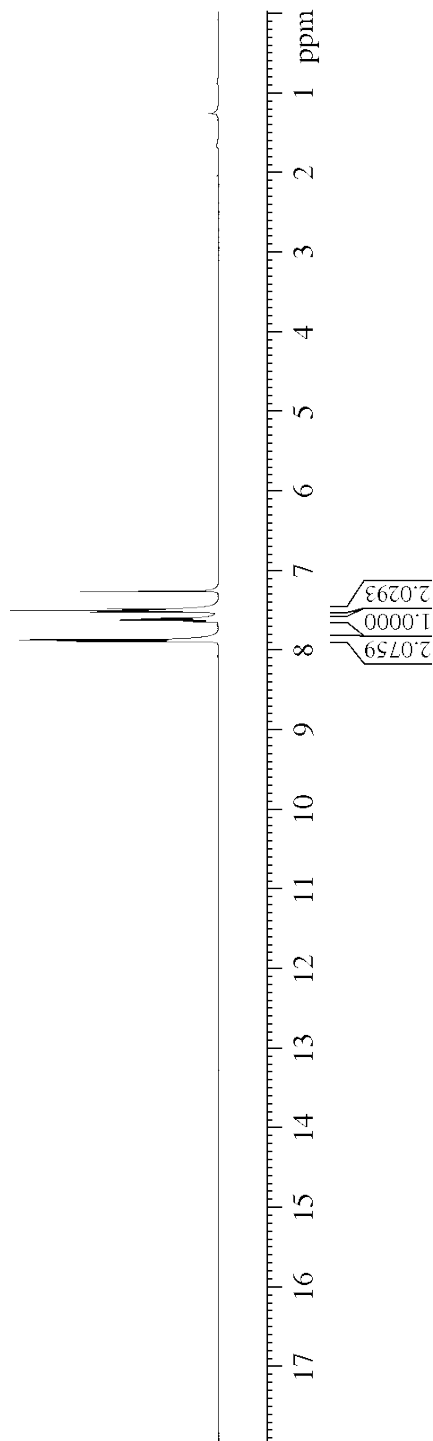

Current Data Parameters  
 NAME zhu\_29  
 EXPNO 2  
 PROCNO 1

F2 - Acquisition Parameters  
 Date 20221220  
 Time 13.38  
 INSTRUM spect  
 PROBHD 5 mm QNP 1H/13  
 PULPROG zgpg30  
 TD 65536  
 SOLVENT CDCl3  
 NS 208  
 DS 0  
 SWH 25252.525 Hz  
 FIDRES 0.385323 Hz  
 AQ 1.2976128 sec  
 RG 2050  
 DW 19.800 usec  
 DE 6.50 usec  
 TE 291.0 K  
 D1 2.00000000 sec  
 d11 0.03000000 sec  
 DELTA 1.89999998 sec  
 TDO 1

==== CHANNEL f1 =====  
 NUC1 13C  
 P1 10.00 usec  
 PL1 6.20 dB  
 SFO1 100.6213395 MHz

==== CHANNEL f2 =====  
 CPDPRG2 waltz16  
 NUC2 1H  
 PCPD2 90.00 usec  
 PL2 -0.40 dB  
 PL12 15.80 dB  
 PL13 18.50 dB  
 SFO2 400.1316005 MHz

F2 - Processing parameters  
 SI 32768  
 SF 100.6127788 MHz  
 WDW EM  
 SSB 0  
 LB 1.00 Hz  
 GB 0  
 PC 1.40

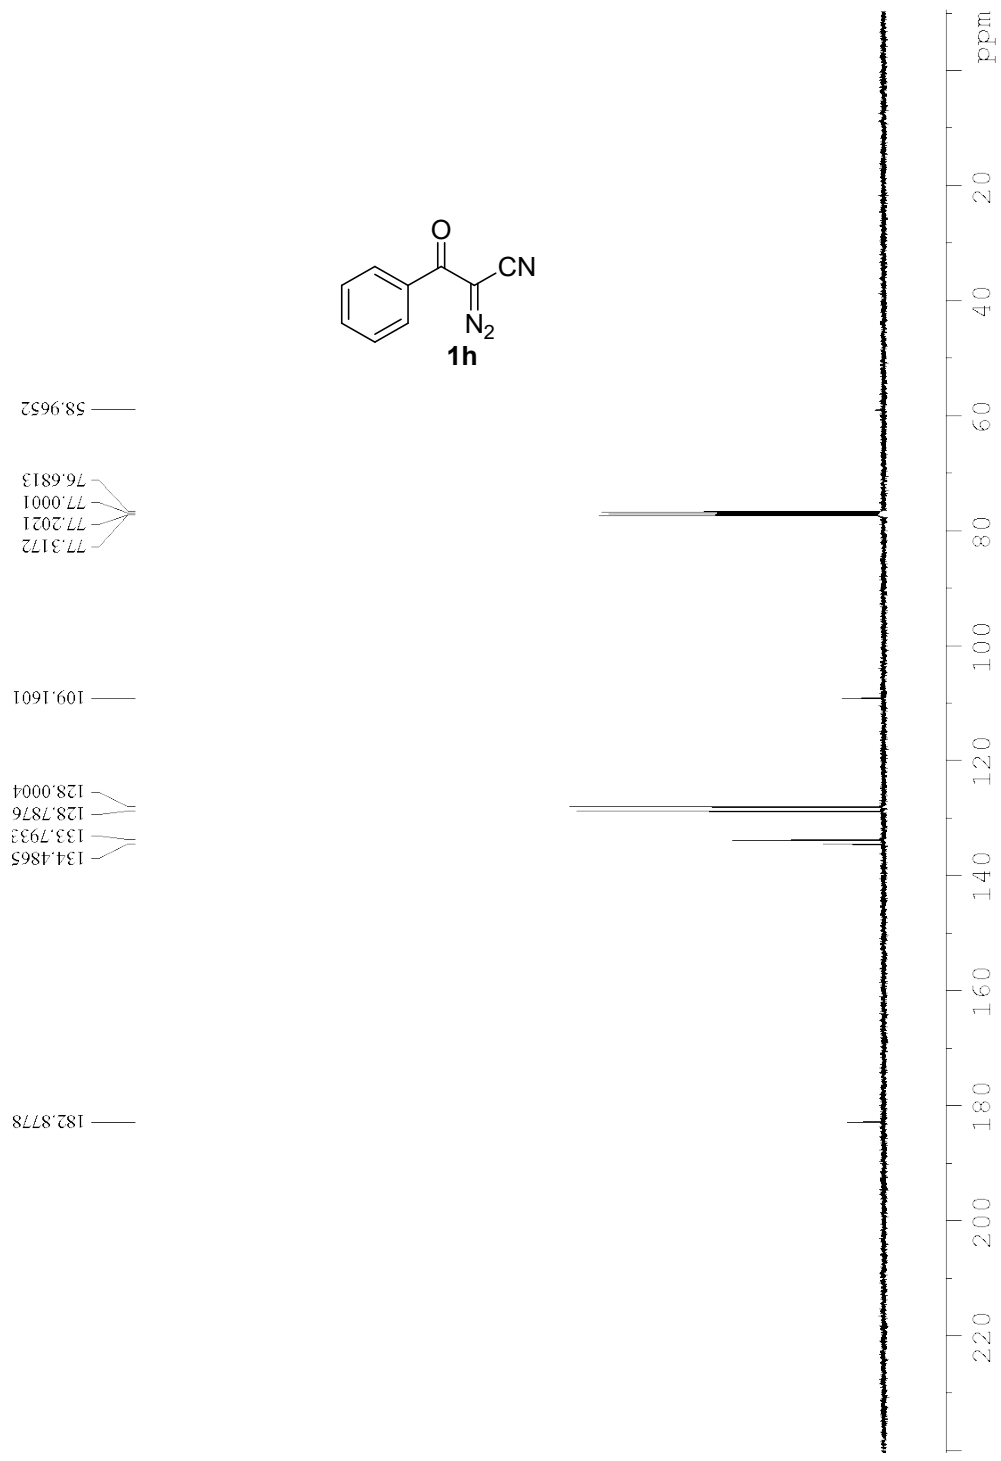

Current Data Parameters  
NAME zhu-22  
EXPNO 3  
PROCNO 1

F2 - Acquisition Parameters  
Date\_ 20221128  
Time 12.20  
INSTRUM spect  
PROBHD 5 mm QNP 1H/13  
PULPROG zg30  
TD 32768  
SOLVENT CDCl3  
NS 41  
DS 0  
SWH 7211.539 Hz  
FIDRES 0.220079 Hz  
AQ 2.2719147 sec  
RG 228  
DW 69.333 usec  
DE 6.50 usec  
TE 293.3 K  
D1 2.0000000 sec  
TD0 1

==== CHANNEL f1 =====  
NUC1 1H  
P1 15.00 usec  
PL1 0.90 dB  
SFO1 400.1336012 MHz

F2 - Processing parameters  
SI 16384  
SF 400.1300088 MHz  
WDW EM  
SSB 0  
LB 0.30 Hz  
GB 0  
PC 1.00

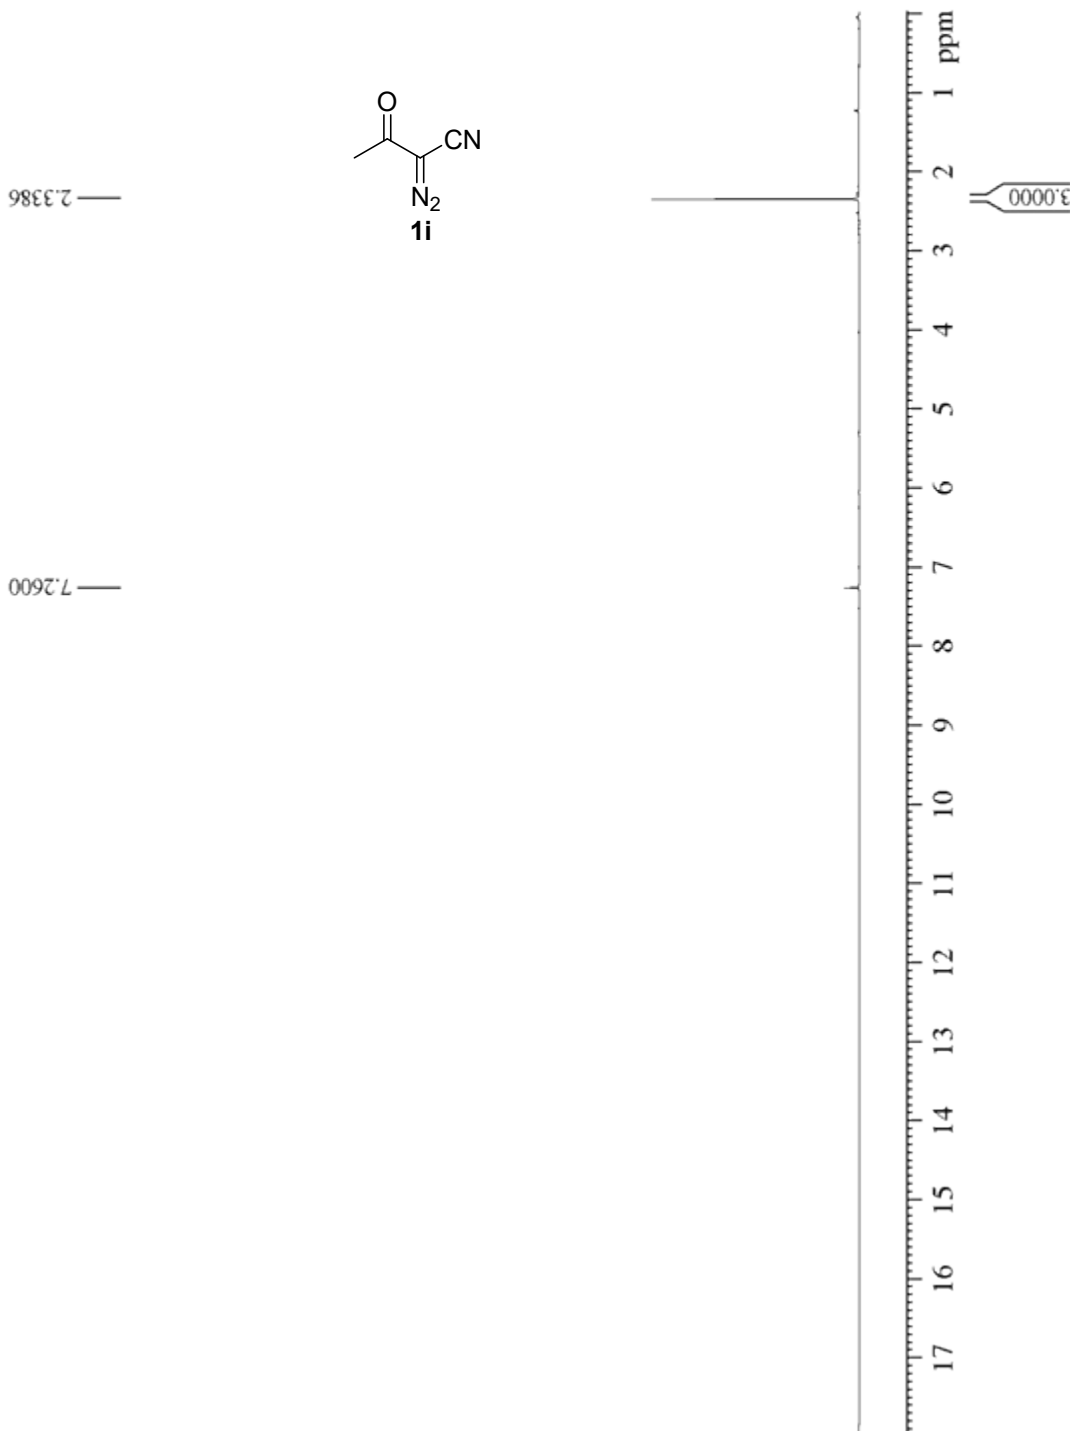

Current Data Parameters  
NAME zhu-22  
EXPNO 4  
PROCNO 1

F2 - Acquisition Parameters  
Date\_ 20221128  
Time 12.25  
INSTRUM spect  
PROBHD 5 mm QNP 1H/13  
PULPROG zgpg30  
TD 65536  
SOLVENT CDCl3  
NS 350  
DS 0  
SWH 25252.525 Hz  
FIDRES 0.385323 Hz  
AQ 1.2976128 sec  
RG 2050  
DW 19.800 usec  
DE 6.50 usec  
TE 293.4 K  
D1 2.00000000 sec  
d11 0.03000000 sec  
DELTA 1.89999998 sec  
TD0 1

==== CHANNEL f1 =====  
NUC1 13C  
P1 10.00 usec  
PL1 6.20 dB  
SFO1 100.6243395 MHz

==== CHANNEL f2 =====  
CPDPRG2 walz16  
NUC2 1H  
PCPD2 90.00 usec  
PL2 -0.40 dB  
PL12 15.80 dB  
PL13 18.50 dB  
SFO2 400.1316005 MHz

F2 - Processing parameters  
SI 32768  
SF 100.6127807 MHz  
WDW EM  
SSB 0  
LB 1.00 Hz  
GB 0  
PC 1.40

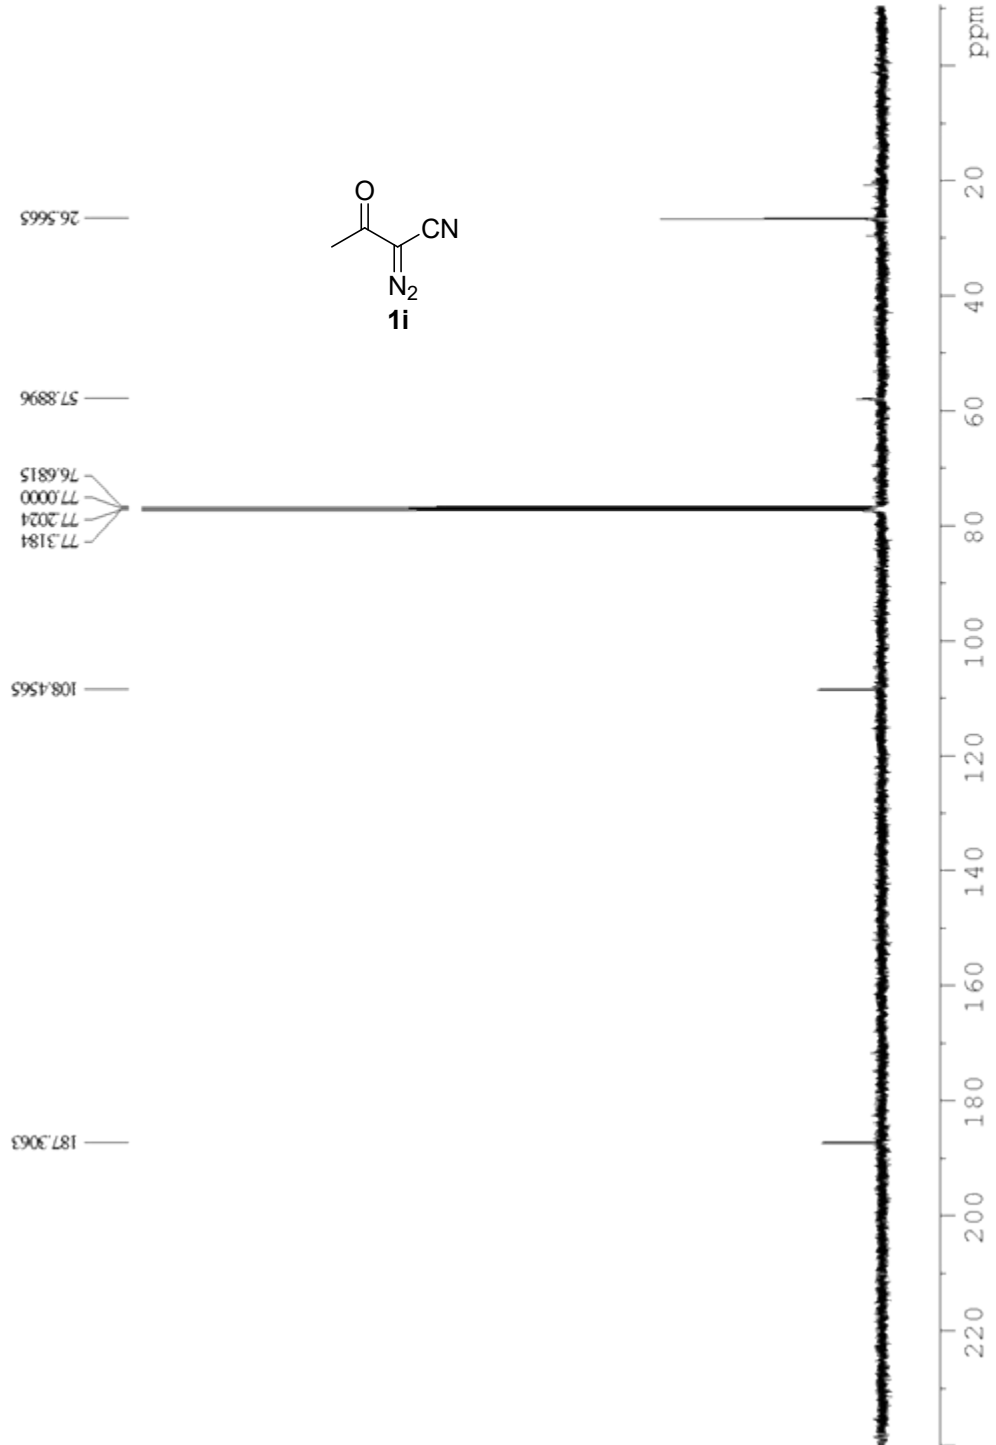



### 3) Preparation and NMR Spectra of Norcaradienes 2a-d

*Typical Procedure:* A solution of  $\alpha$ -cyanodiazoacetates **1** (0.8376 mmol) in  $\text{CH}_2\text{Cl}_2$  (4.3 mL) was added dropwise to a stirred mixture of benzene or toluene (50.20 mmol, 60 equiv) and  $\text{Rh}_2(\text{esp})_2$  (19.8 mg, 96%, 0.03 equiv relative to **1**) in  $\text{CH}_2\text{Cl}_2$  (4 mL) *via* a syringe over 6 min. The reaction mixture was stirred for an additional 1 h followed by the concentration under reduced pressure. The crude residue was subjected to chromatographic purification on triethylamine-deactivated silica gel by eluting with hexane/ethyl acetate to furnish **2a-d**. (*1R*\*,*6S*\*,*7R*\*)-Ethyl-7-cyanobicyclo[4.1.0]hepta-2,4-diene-7-carboxylate (**2a**)<sup>7</sup>

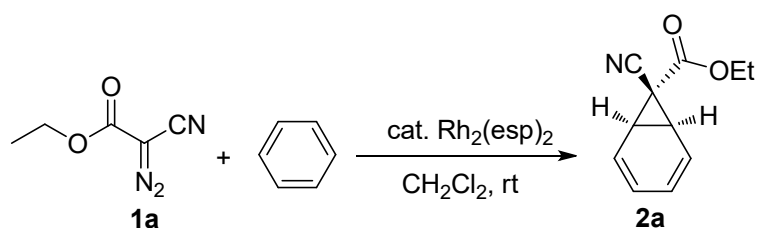

The titled compound was synthesized from **1a** and benzene by following the typical procedure. After chromatographic purification (triethylamine-deactivated silica gel; hexane/ethyl acetate = 6:1, 3:1), **2a** was obtained in 66% yield as a white solid. <sup>1</sup>H NMR (400 MHz,  $\text{CDCl}_3$ )  $\delta$  6.42 (dd,  $J = 7.4, 2.8$  Hz, 2 H, =CH), 6.24-6.19 (m, 2 H, =CH), 4.31 (q,  $J = 7.1$  Hz, 2 H,  $\text{CH}_3\text{CH}_2\text{O}$ ), 3.24-3.22 (m, 2 H), 1.36 (t,  $J = 7.1$  Hz, 3 H,  $\text{CH}_3\text{CH}_2\text{O}$ ) ppm; <sup>13</sup>C NMR (100 MHz,  $\text{CDCl}_3$ )  $\delta$  170.1 (C=O), 127.2 (=CH), 122.1 (=CH), 112.4 (C $\equiv$ N), 63.2 ( $\text{CH}_2\text{O}$ ), 39.3 (CH), 14.1 ( $\text{CH}_3$ ), 12.1 (C) ppm.

(*1R*\*,*6S*\*,*7R*\*)-Methyl-7-cyanobicyclo[4.1.0]hepta-2,4-diene-7-carboxylate (**2b**)<sup>8</sup>

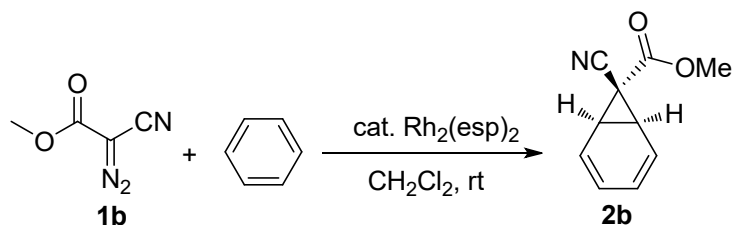

The titled compound was synthesized from **1b** and benzene by following the typical procedure. After chromatographic purification (triethylamine-deactivated silica gel; hexane/ethyl acetate = 10:1, 6:1), **2b** was obtained in 71% yield as a white solid. <sup>1</sup>H NMR (400 MHz,  $\text{CDCl}_3$ )  $\delta$  6.43 (dd,  $J = 7.4, 2.8$  Hz, 2 H, =CH), 6.24-6.20 (m, 2 H, =CH), 3.87 (s, 3 H,  $\text{CH}_3\text{O}$ ), 3.25 (br t,  $J = 3.1$  Hz, 2 H) ppm; <sup>13</sup>C NMR (100 MHz,  $\text{CDCl}_3$ )  $\delta$  170.7 (C=O), 127.4 (=CH), 122.0 (=CH), 112.4 (C $\equiv$ N), 53.9 ( $\text{CH}_3\text{O}$ ), 39.4 (CH), 12.2 (C) ppm.

(*1R*\*,*6S*\*,*7R*\*)-*tert*-Butyl-7-cyanobicyclo[4.1.0]hepta-2,4-diene-7-carboxylate (**2c**)<sup>9</sup>

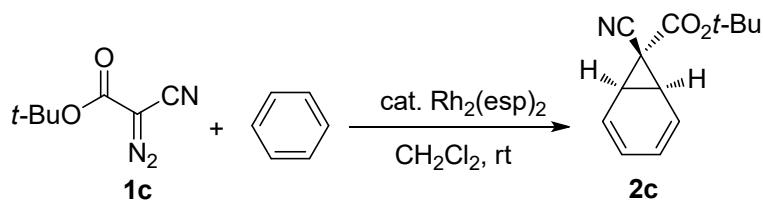

The titled compound was synthesized from **1c** and benzene by following the typical procedure. After chromatographic purification (triethylamine-deactivated silica gel; hexane/ethyl acetate = 12:1), **2c** was obtained in 54% yield as a white solid. <sup>1</sup>H NMR (400 MHz, CDCl<sub>3</sub>) δ 6.40 (dd, *J* = 7.4, 2.9 Hz, 2 H, =CH), 6.22-6.18 (m, 2 H, =CH), 3.15 (br t, *J* = 3.2 Hz, 2 H), 1.53 (s, 9 H) ppm; <sup>13</sup>C NMR (100 MHz, CDCl<sub>3</sub>) δ 168.8 (C=O), 127.1 (=CH), 122.2 (=CH), 112.7 (C≡N), 84.2 (C-O), 39.0 (CH), 27.9 (CH<sub>3</sub>), 12.7 (C) ppm.

(1*R*\*,6*S*\*,7*R*\*)-*tert*-Butyl-7-cyano-3-methylbicyclo[4.1.0]hepta-2,4-diene-7-carboxylate (**2d**)<sup>9</sup>

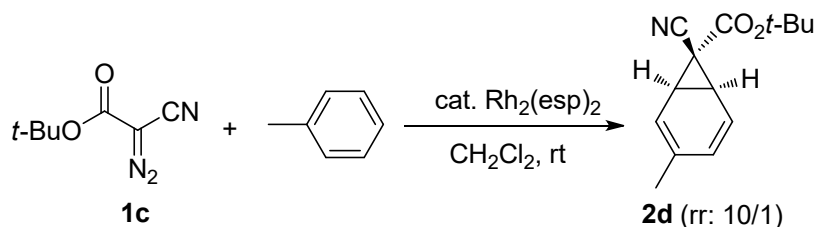

The titled compound was synthesized from **1c** and toluene by following the typical procedure. Chromatographic purification (triethylamine-deactivated silica gel; hexane/ethyl acetate = 50:1, 10:1, 6:1) afforded 59% of **2d** as a mixture of two regioisomers (rr: 10/1). <sup>1</sup>H NMR (400 MHz, CDCl<sub>3</sub>) major isomer: δ 6.23 (br d, *J* = 9.5 Hz, 1 H, =CH), 6.16-6.13 (m, 1 H, =CH), 5.87 (m, 1 H, =CH), 3.07-3.02 (m, 2 H), 1.92 (s, 3 H, CH<sub>3</sub>), 1.49 (s, 9 H, methyl of *tert*-Bu) ppm; minor isomer: δ 6.30 (dd, *J* = 9.3, 6.3 Hz, 1 H, =CH), 6.14-6.10 (m, 1 H, =CH), 6.01 (dd, *J* = 9.3, 5.4 Hz, 1 H, =CH), 2.94-2.92 (m, 2 H), 2.02 (s, 3 H, CH<sub>3</sub>), 1.50 (s, 9 H, methyl of *tert*-Bu) ppm; <sup>13</sup>C NMR (100 MHz, CDCl<sub>3</sub>) major isomer: δ 168.7 (C=O), 135.6, 130.9, 112.1, 117.0, 112.9 (CN), 83.7 (C-O), 38.7 (CH), 37.3 (CH), 27.8 (methyl of *t*-Bu), 21.4 (CH<sub>3</sub>), 13.5 (C) ppm; minor isomer: δ 168.9 (C=O), 132.0, 127.6, 122.4, 118.7, 112.6 (CN), 83.9 (C-O), 40.9 (C), 39.1 (C), 27.8 (methyl of *t*-Bu), 22.9 (CH<sub>3</sub>), 13.5 (C) ppm.

Current Data Parameters  
 NAME zhu-12-1  
 EXPNO 1  
 PROCNO 1

F2 - Acquisition Parameters  
 Date\_ 20221001  
 Time 14.25  
 INSTRUM spect  
 PROBHD 5 mm QNP 1H/13  
 PULPROG zg30  
 TD 32768  
 SOLVENT CDCl3  
 NS 40  
 DS 0  
 SWH 7211.539 Hz  
 FIDRES 0.220079 Hz  
 AQ 2.2719147 sec  
 RG 228  
 DW 69.333 usec  
 DE 6.50 usec  
 TE 293.9 K  
 D1 2.00000000 sec  
 TD0 1

==== CHANNEL f1 =====  
 NUC1 1H  
 P1 15.00 usec  
 PL1 0.90 dB  
 SFO1 400.1336012 MHz

F2 - Processing parameters  
 SI 16384  
 SF 400.1300094 MHz  
 WDW EM  
 SSB 0  
 LB 0.30 Hz  
 GB 0  
 PC 1.00

7.2600  
6.4368  
6.4297  
6.4184  
6.4112  
6.2355  
6.2280  
6.2197  
6.2104  
6.2015  
6.1945  
4.3334  
4.3156  
4.2978  
4.2800  
3.2424  
3.2344  
3.2271  
1.3715  
1.3537  
1.3358

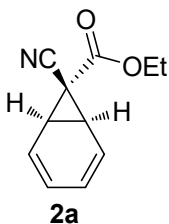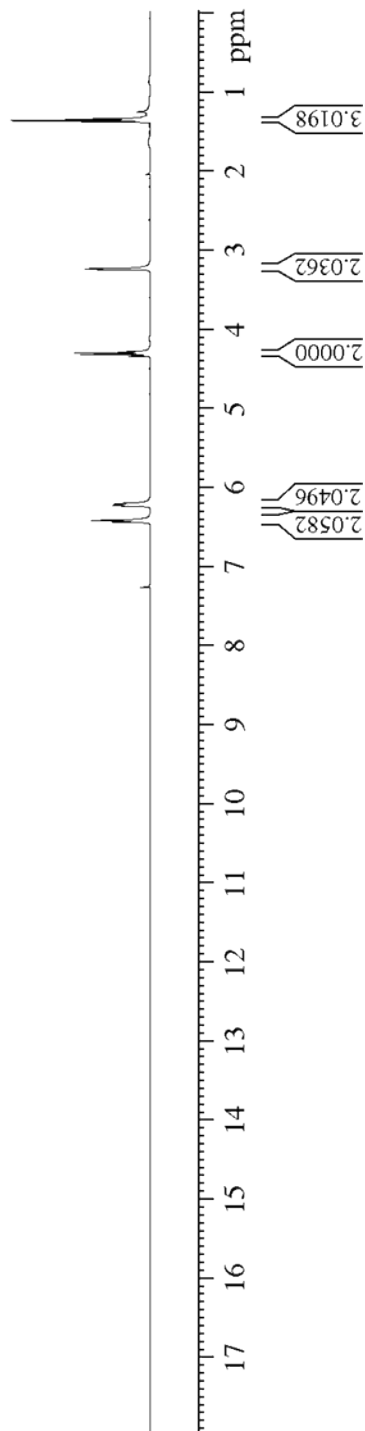

Current Data Parameters  
 NAME zhu-12-1  
 EXPNO 2  
 PROCNO 1

F2 - Acquisition Parameters  
 Date\_ 20221001  
 Time 14:32  
 INSTRUM spect  
 PROBHD 5 mm QNP 1H/13  
 PULPROG zgpg30  
 TD 65536  
 SOLVENT CDCl3  
 NS 601  
 DS 0  
 SWH 25252.525 Hz  
 FIDRES 0.385323 Hz  
 AQ 1.2976128 sec  
 RG 2050  
 DW 19.800 usec  
 DE 6.50 usec  
 TE 294.4 K  
 D1 2.00000000 sec  
 d11 0.03000000 sec  
 DELTA 1.89999998 sec  
 TD0 1

==== CHANNEL f1 =====  
 NUC1 13C  
 P1 10.00 usec  
 PL1 6.20 dB  
 SFO1 100.6243395 MHz

==== CHANNEL f2 =====  
 CPDPRG2 waltz16  
 NUC2 1H  
 PCPD2 90.00 usec  
 PL2 -0.40 dB  
 PL12 15.80 dB  
 PL13 18.50 dB  
 SFO2 400.1316005 MHz

F2 - Processing parameters  
 SI 32768  
 SF 100.6127755 MHz  
 WDW EM  
 SSB 0  
 LB 1.00 Hz  
 GB 0  
 PC 1.40

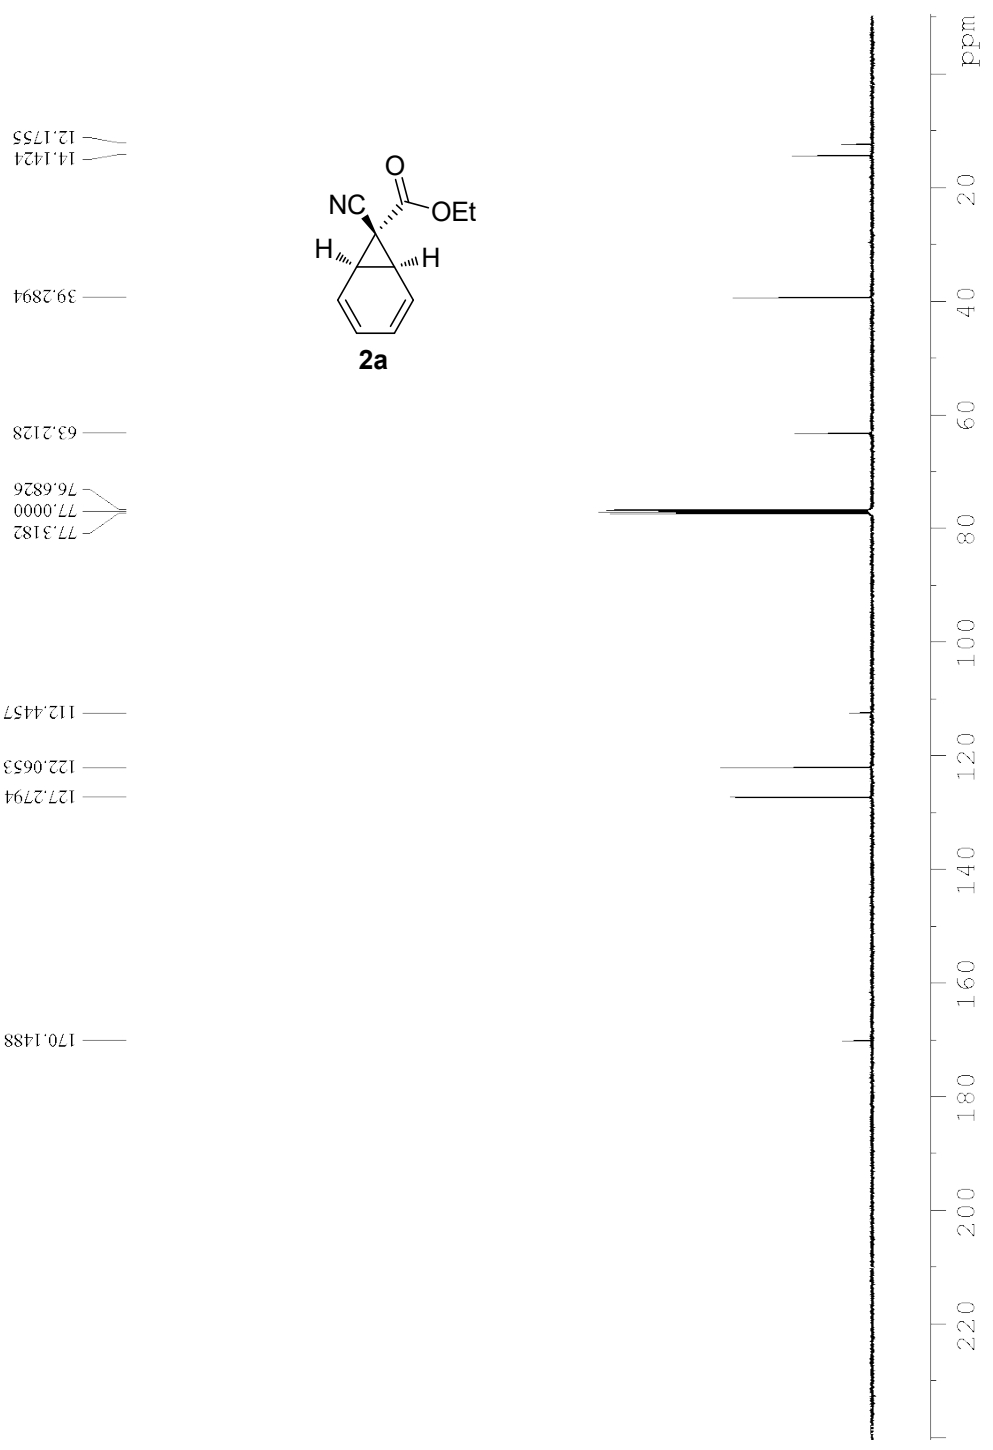

Current Data Parameters  
NAME zhu-80  
EXPNO 1  
PROCNO 1

F2 - Acquisition Parameters  
Date\_ 20230717  
Time 16.34  
INSTRUM spect  
PROBHD 5 mm QNP 1H/13  
PULPROG zg30  
TD 32768  
SOLVENT CDC13  
NS 32  
DS 0  
SWH 7211.539 Hz  
FIDRES 0.220079 Hz  
AQ 2.2719147 sec  
RG 456  
DW 69.333 usec  
DE 6.50 usec  
TE 294.9 K  
D1 2.00000000 sec  
TD0 1

==== CHANNEL f1 =====  
NUC1 1H  
P1 15.00 usec  
PL1 0.90 dB  
SFO1 400.1336012 MHz

F2 - Processing parameters  
SI 16384  
SF 400.1300092 MHz  
WDW EM  
SSB 0  
LB 0.30 Hz  
GB 0  
PC 1.00

7.2600  
6.4471  
6.4400  
6.4287  
6.4216  
6.2402  
6.2330  
6.2245  
6.2152  
6.2065  
6.1991  
3.8742  
3.2625  
3.2548  
3.2471

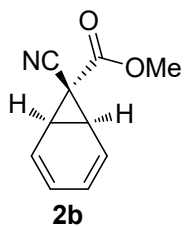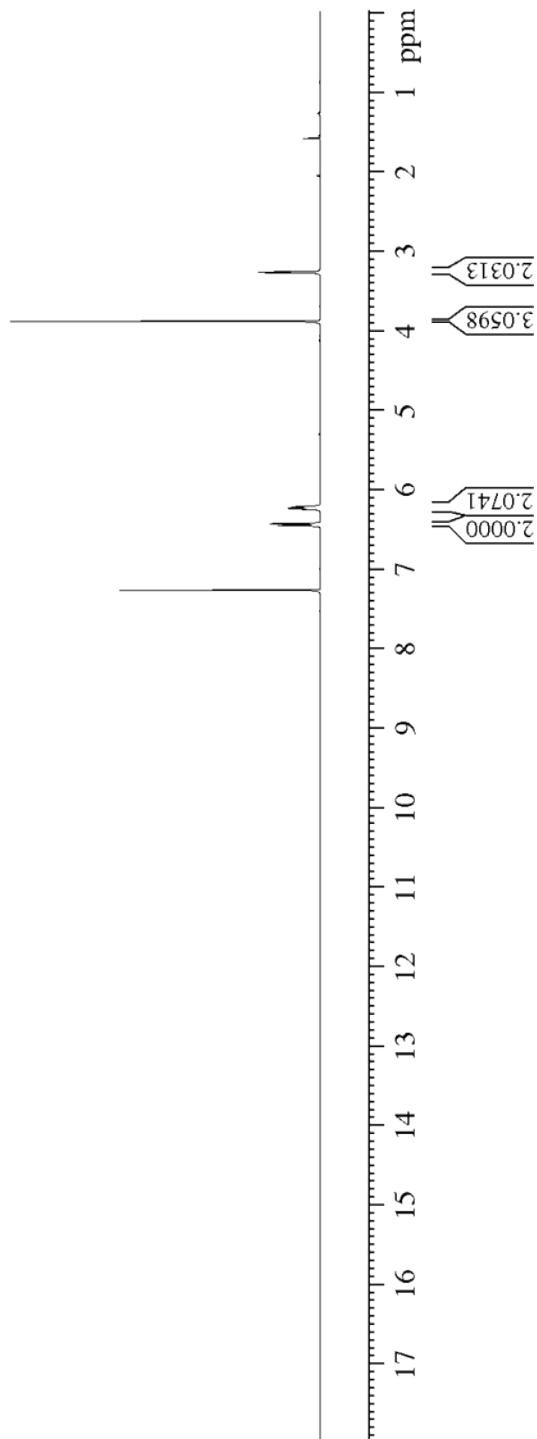

Current Data Parameters  
 NAME zhu-80  
 EXPNO 2  
 PROCNO 1

F2 - Acquisition Parameters  
 Date\_ 20230717  
 Time 16.41  
 INSTRUM spect  
 PROBHD 5 mm QNP 1H/13  
 PULPROG zgpg30  
 TD 65536  
 SOLVENT CDCl3  
 NS 252  
 DS 0  
 SWH 25252.525 Hz  
 FIDRES 0.385323 Hz  
 AQ 1.2976128 sec  
 RG 2050  
 DW 19.800 usec  
 DE 6.50 usec  
 TE 295.2 K  
 D1 2.00000000 sec  
 d11 0.03000000 sec  
 DELTA 1.89999998 sec  
 TD0 1

==== CHANNEL f1 =====  
 NUC1 13C  
 P1 10.00 usec  
 PL1 6.20 dB  
 SFO1 100.6243395 MHz

==== CHANNEL f2 =====  
 CPDPRG2 waltz16  
 NUC2 1H  
 PCPD2 90.00 usec  
 PL2 -0.40 dB  
 PL12 15.80 dB  
 PL13 18.50 dB  
 SFO2 400.1316005 MHz

F2 - Processing parameters  
 SI 32768  
 SF 100.6127730 MHz  
 WDW EM  
 SSB 0  
 LB 1.00 Hz  
 GB 0  
 PC 1.40

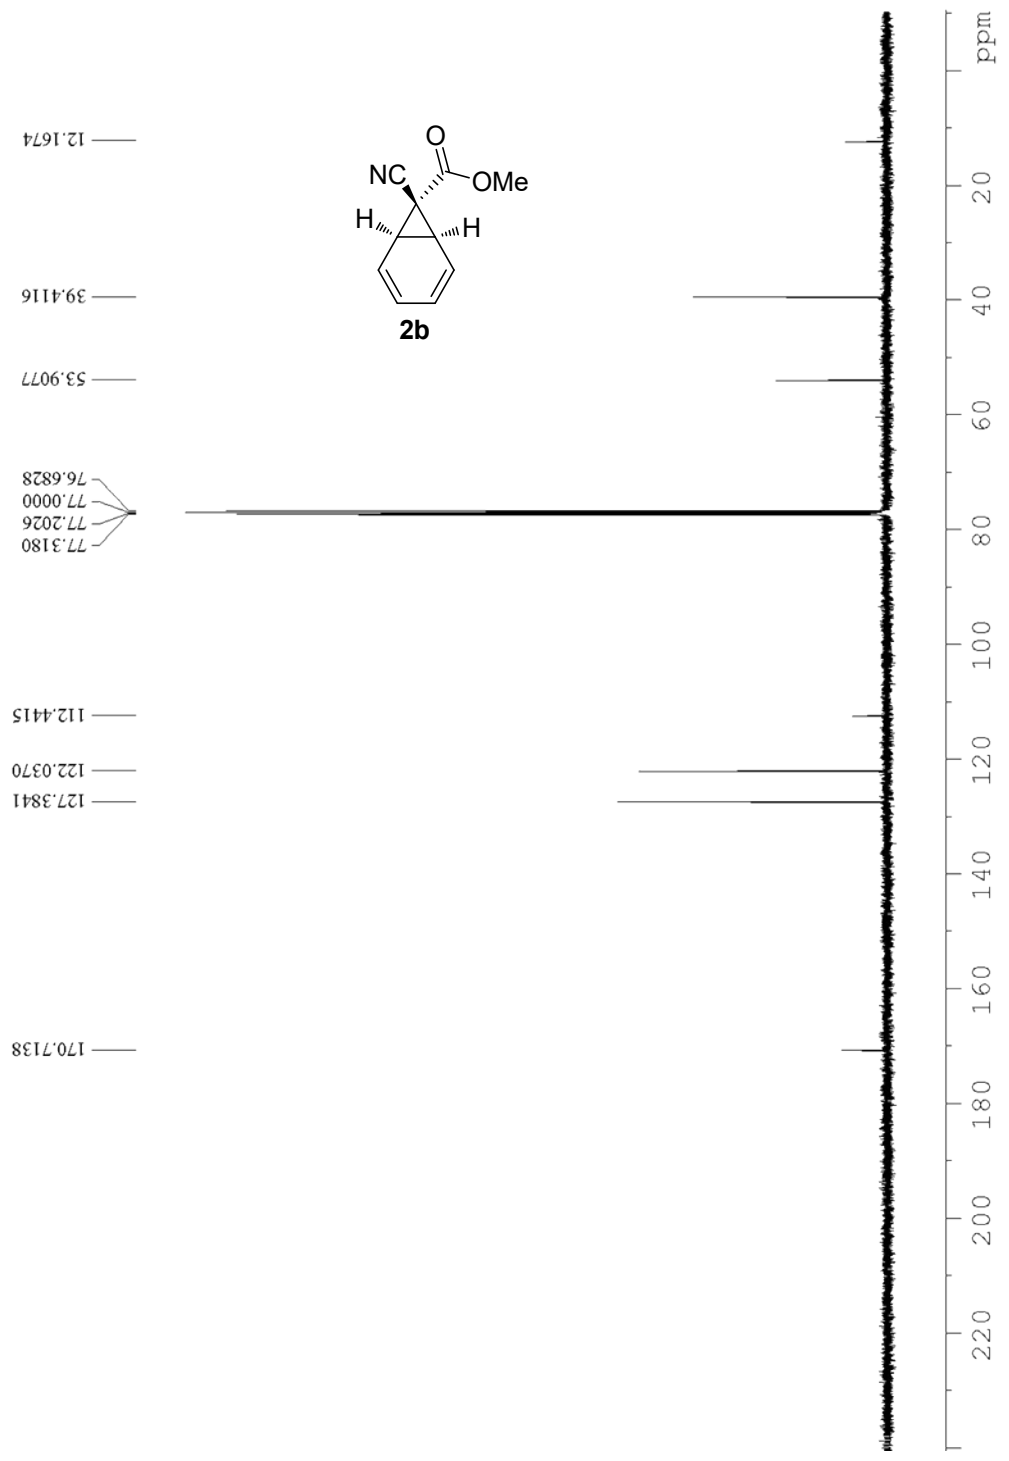

Current Data Parameters  
NAME zhu-76  
EXPNO 1  
PROCNO 1

F2 - Acquisition Parameters  
Date\_ 20230710  
Time 13:06  
INSTRUM spect  
PROBHD 5 mm QNP 1H/13  
PULPROG zg30  
TD 32768  
SOLVENT CDCl3  
NS 32  
DS 0  
SWH 7211.539 Hz  
FIDRES 0.220079 Hz  
AQ 2.2719147 sec  
RG 203  
DW 69.333 usec  
DE 6.50 usec  
TE 293.7 K  
D1 2.00000000 sec  
TD0 1

==== CHANNEL f1 =====  
NUC1 1H  
P1 15.00 usec  
PL1 0.90 dB  
SFO1 400.1336012 MHz

F2 - Processing parameters  
SI 16384  
SF 400.1300093 MHz  
WDW EM  
SSB 0  
LB 0.30 Hz  
GB 0  
PC 1.00

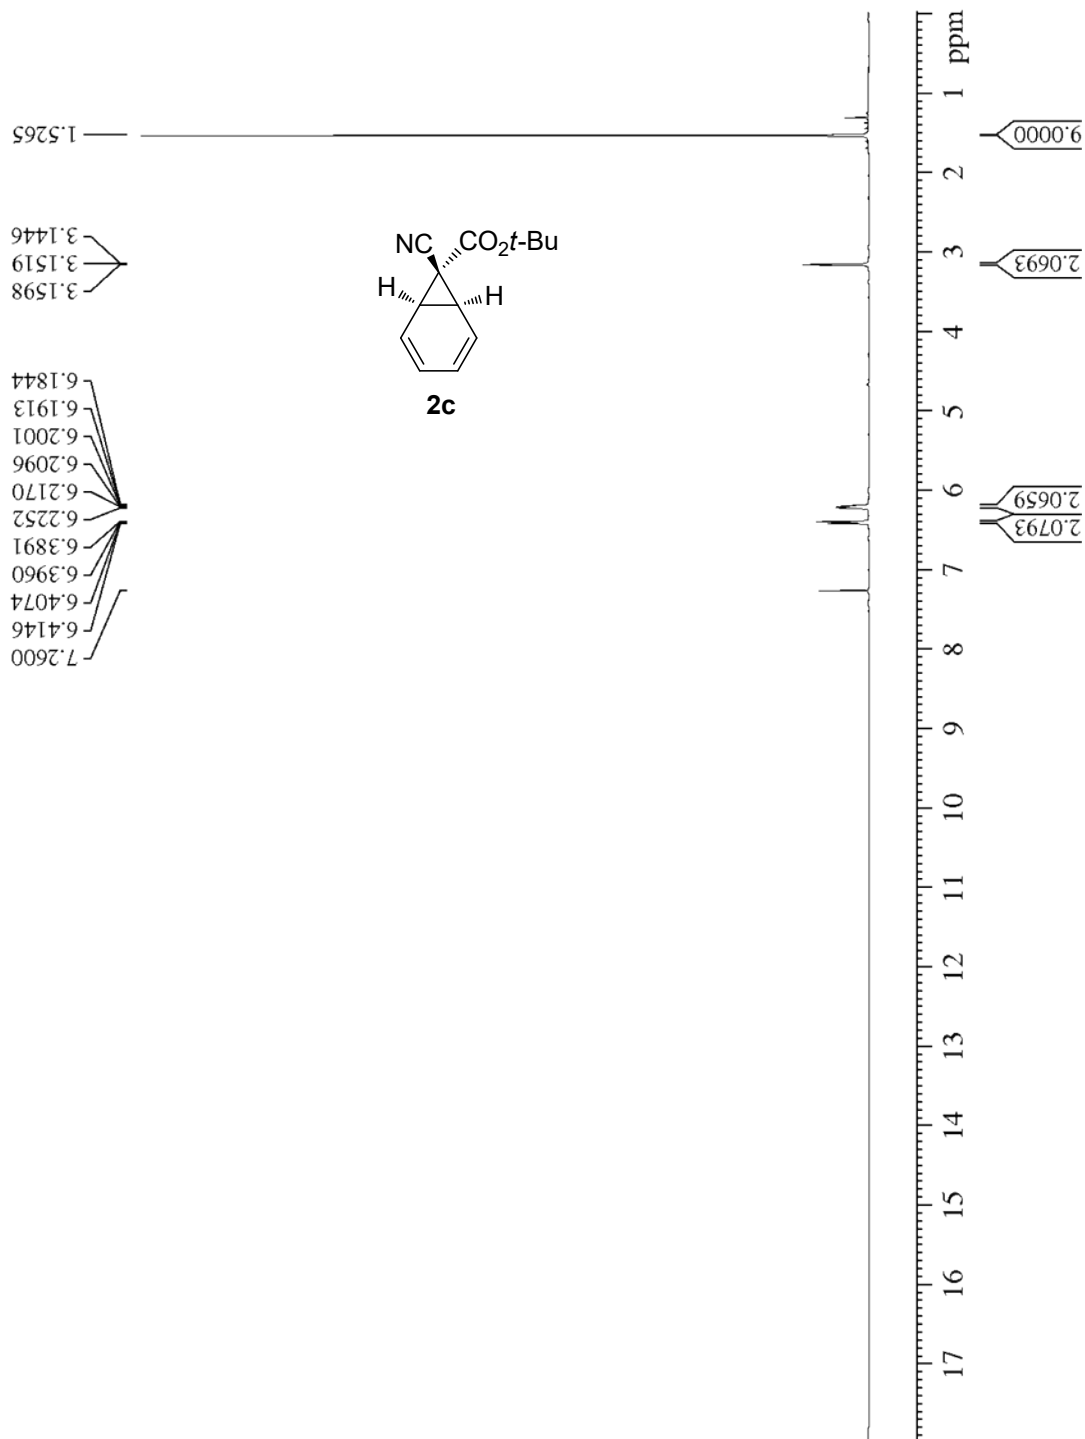

Current Data Parameters  
 NAME zhu-76  
 EXPNO 2  
 PROCNO 1

F2 - Acquisition Parameters  
 Date\_ 20230710  
 Time 13.16  
 INSTRUM spect  
 PROBHID 5 mm QNP 1H/13  
 PULPROG zgpg30  
 TD 65536  
 SOLVENT CDCl3  
 NS 361  
 DS 0  
 SWH 25252.525 Hz  
 FIDRES 0.385523 Hz  
 AQ 1.2976128 sec  
 RG 2050  
 DW 19.800 usec  
 DE 6.50 usec  
 TE 294.1 K  
 D1 2.00000000 sec  
 d11 0.03000000 sec  
 DELTA 1.89999998 sec  
 TD0 1

==== CHANNEL f1 =====  
 NUC1 13C  
 P1 10.00 usec  
 PL1 6.20 dB  
 SFO1 100.6243395 MHz

==== CHANNEL f2 =====  
 CPDPRG2 waltz16  
 NUC2 1H  
 PCPD2 90.00 usec  
 PL2 -0.40 dB  
 PL12 15.80 dB  
 PL13 18.50 dB  
 SFO2 400.1316005 MHz

F2 - Processing parameters  
 SI 32768  
 SF 100.6127761 MHz  
 WDW EM  
 SSB 0  
 LB 1.00 Hz  
 GB 0  
 PC 1.40

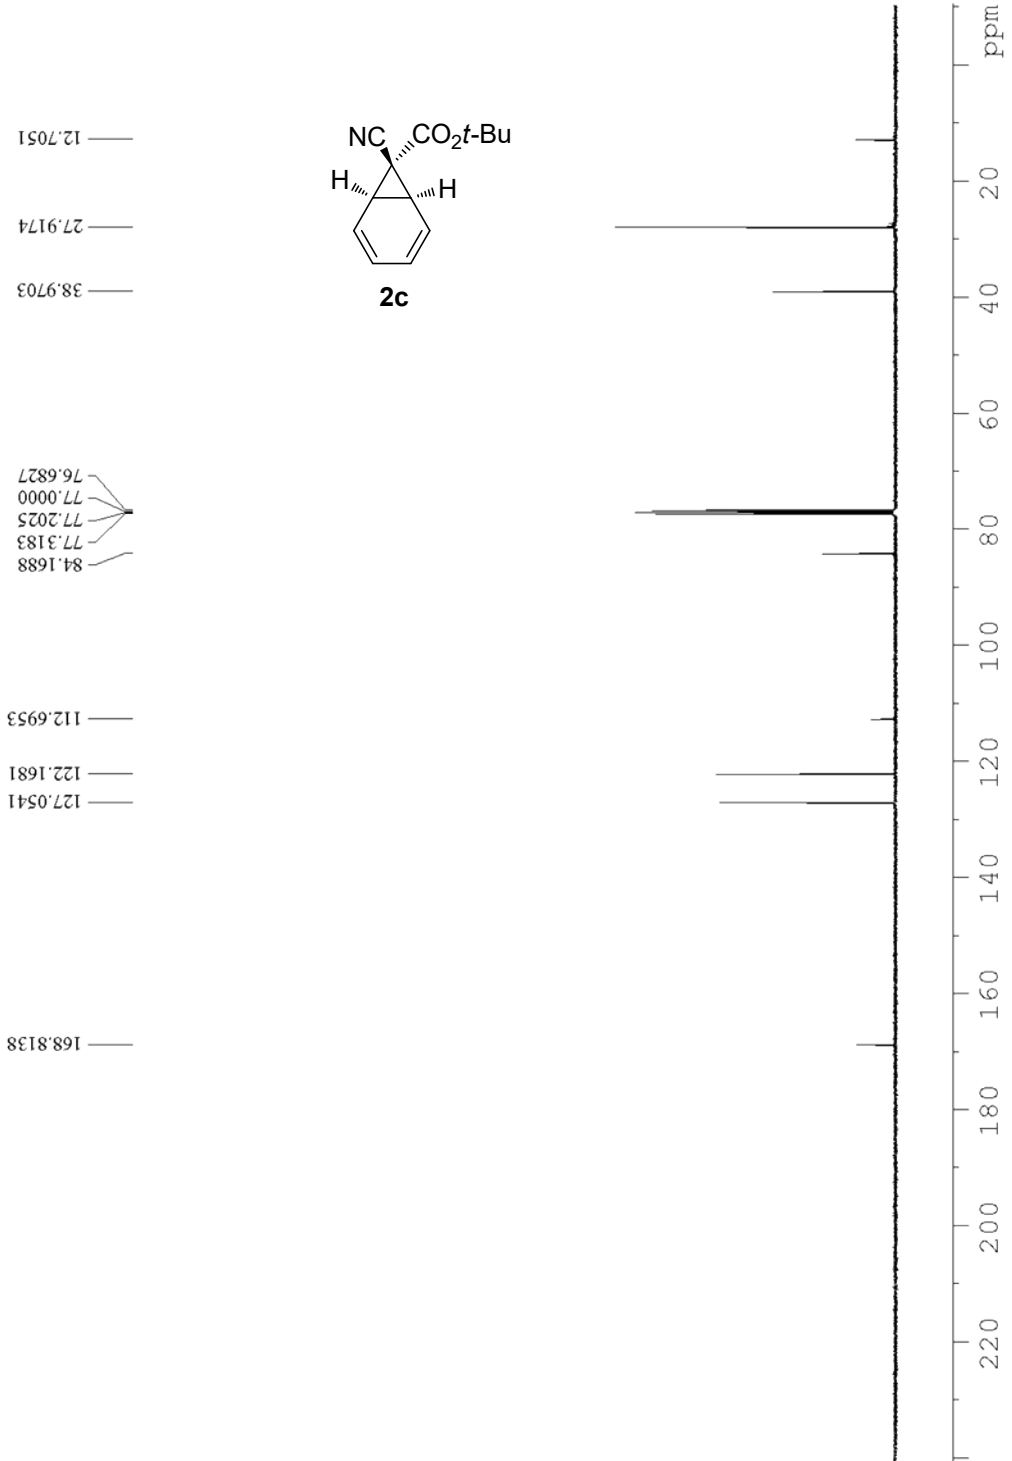



Current Data Parameters  
 NAME zhu-81  
 EXPNO 1  
 PROCNO 1

F2 - Acquisition Parameters

Date\_ 20230720  
 Time 12:07  
 INSTRUM spect  
 PROBH1 5 mm QNP 1H/13  
 PULPROG zg30  
 TD 32768  
 SOLVENT CDCl3  
 NS 32  
 DS 0  
 SWH 7211.539 Hz  
 FIDRES 0.220079 Hz  
 AQ 2.2719147 sec  
 RG 40.3  
 DW 69.333 usec  
 DE 6.50 usec  
 TE 294.2 K  
 D1 2.00000000 sec  
 TD0 1

===== CHANNEL f1 =====

NUC1 1H  
 P1 15.00 usec  
 PL1 0.90 dB  
 SFO1 400.1336012 MHz

F2 - Processing parameters

SI 16384  
 SF 400.1300089 MHz  
 WDW EM  
 SSB 0  
 LB 0.30 Hz  
 GB 0  
 PC 1.00

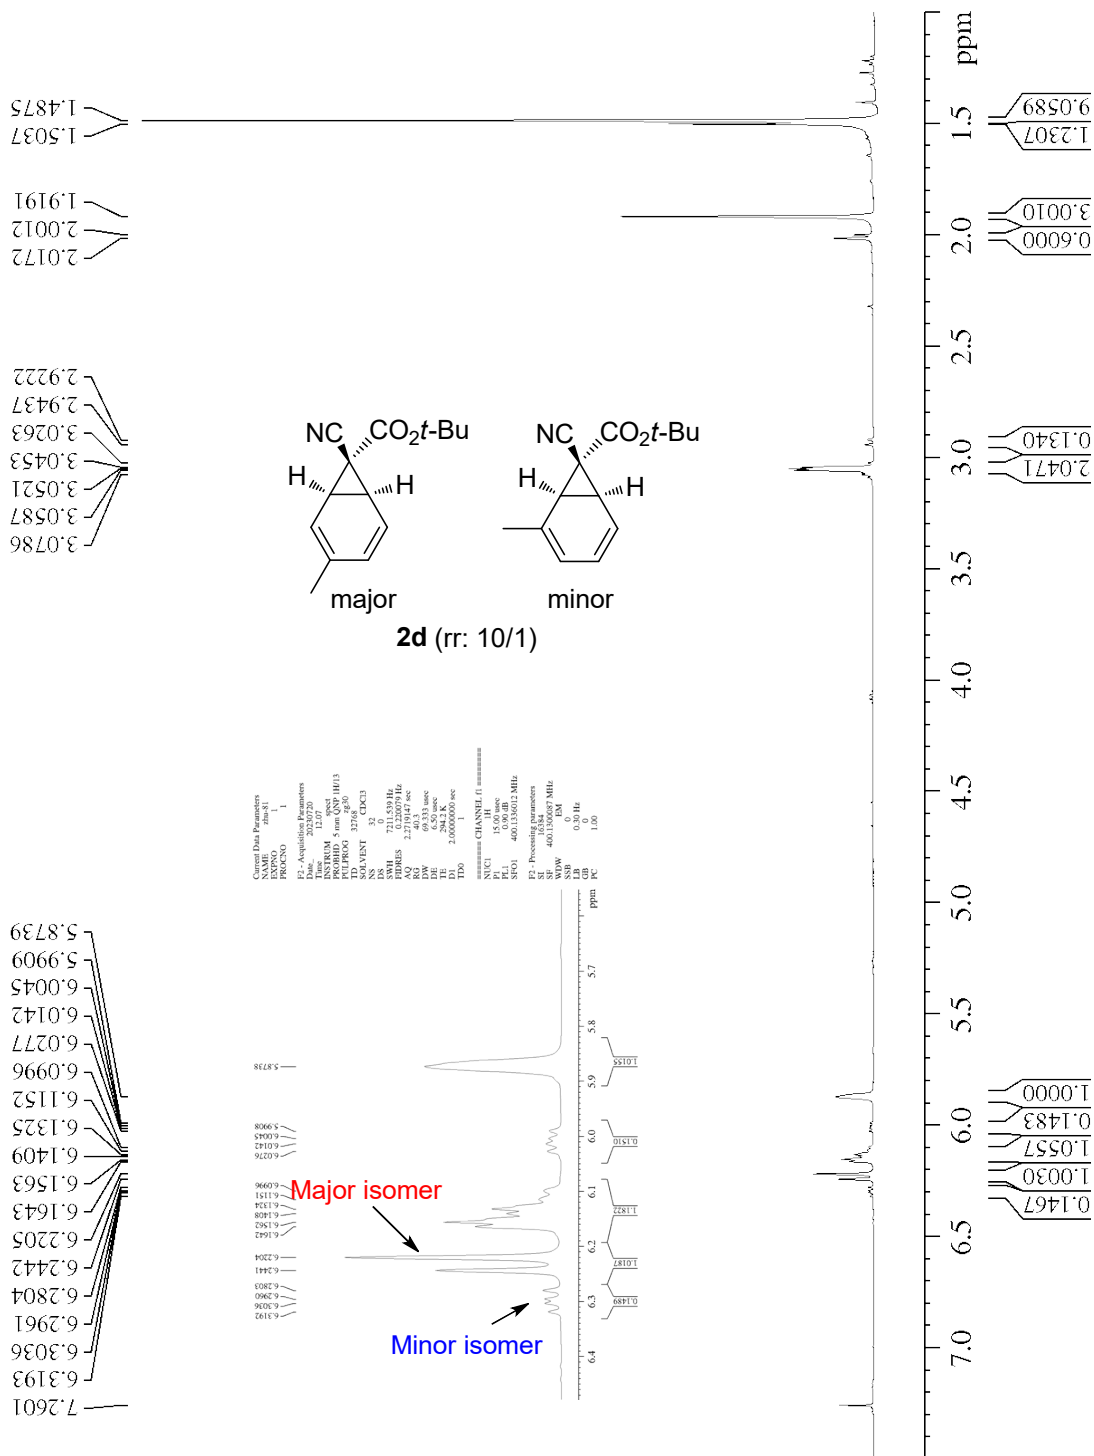

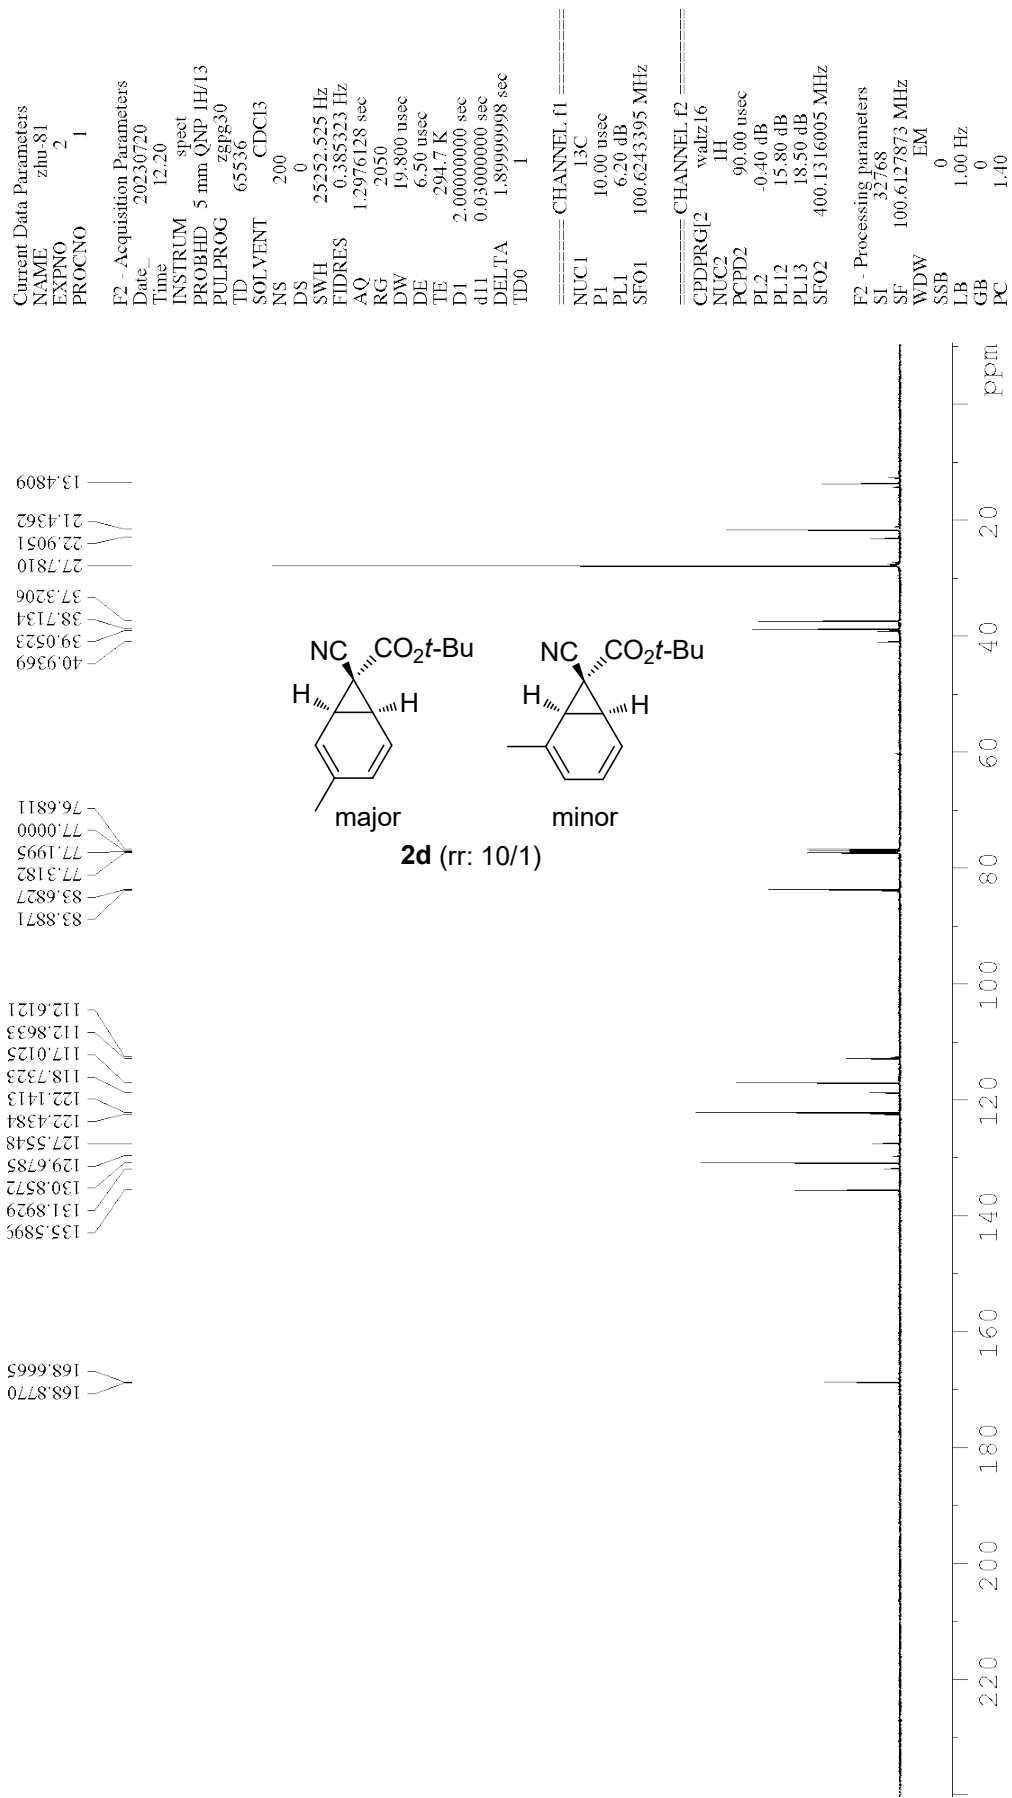

**4) Synthesis and <sup>1</sup>H-NMR <sup>13</sup>C-NMR, COSY, NOESY Spectra of **3a/3a'** together with <sup>1</sup>H- and <sup>13</sup>C-NMR Spectra of (*E*)- and (*Z*)-Diethyl Fumarates (1*R*\*,2*S*\*,3*S*\*,4*R*\*,7*R*\*,8*S*\*)-Diethyl-3-cyanotricyclo[5.1.0.0<sup>2,4</sup>]oct-5-ene-3,8-dicarboxylate (**3a**) and (1*R*\*,2*S*\*,3*S*\*,4*R*\*,7*R*\*,8*R*\*)-Diethyl 3-cyanotricyclo[5.1.0.0<sup>2,4</sup>]oct-5-ene-3,8-dicarboxylate (**3a'**)**

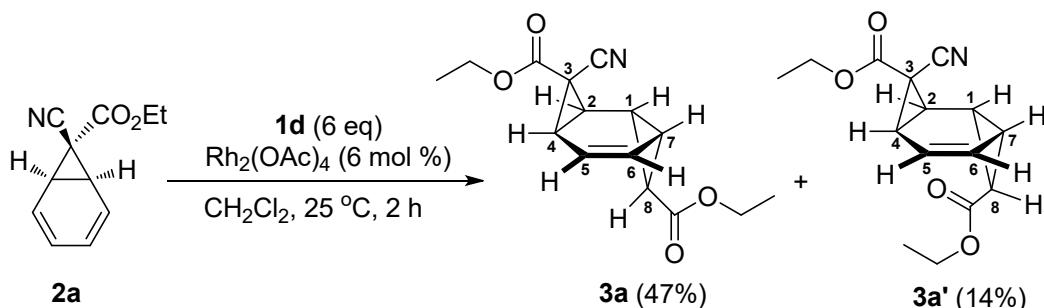

A flame-dried flask equipped with a stir bar was successively charged with **2a** (42.2 mg, 0.223 mmol), DCM (0.5 mL) and Rh<sub>2</sub>(OAc)<sub>4</sub> (6 mg, 99%, 0.0134 mmol, 0.06 equiv relative to **2a**). The flask was then connected to a dropping funnel containing a solution of **1d** (purchased as a 9.29 M solution in DCM, 0.144 mL, 1.34 mmol, 6.0 equiv relative to **2a**) in DCM (4 mL), which was slowly added to the vigorously stirred mixture over 1 h. After the addition was completed, the reaction mixture was stirred for an additional 1 h and concentrated under reduced pressure. The crude residue was subjected to chromatographic purification (Et<sub>3</sub>N-deactivated silica gel; hexane/ethyl acetate = 12:1, 10:1, 3:1) to afford a mixture of **3a** and **3a'** (38 mg, **3a/3a'** = 78:22, **3a**: 47%; **3a'**: 14%) plus (*E*)- and (*Z*)-diethyl fumarates (44 and 54 mg). **3a** and **3a'** can be resolved by preparative TLC on silica gel plate (petroleum ether/acetone = 20:1).

IR (neat, mixed **3a/3a'**): 2921, 2243, 1723, 1245, 1184, 853, 712 cm<sup>-1</sup>.

**3a**: <sup>1</sup>H NMR (400 MHz, CDCl<sub>3</sub>) δ 6.17 (dd, *J*<sub>6-5</sub> = 9.7 Hz, *J*<sub>6-7</sub> = 4.8 Hz, **H-6**), 5.65 (dd, *J*<sub>5-6</sub> = 9.7 Hz, *J*<sub>5-4</sub> = 4.9 Hz, **H-5**), 4.27 (q, *J* = 7.1 Hz, OCH<sub>2</sub>CH<sub>3</sub>), 4.15 (q, *J* = 7.2 Hz, OCH<sub>2</sub>CH<sub>3</sub>), 2.67 (d, *J*<sub>2-4</sub> = 9.1 Hz, **H-2**), 2.23 (dd, *J*<sub>4-2</sub> = 9.1 Hz, *J*<sub>4-5</sub> = 4.9 Hz, **H-4**), 2.20 (dd, *J*<sub>7-1</sub> = 8.7 Hz, *J*<sub>8-1</sub> = 4.2 Hz, **H-1**), 1.95 (ddd, *J*<sub>1-7</sub> = 8.7 Hz, *J*<sub>6-7</sub> = 4.8 Hz, *J*<sub>8-7</sub> = 4.1 Hz, **H-7**), 1.83 (dd, *J*<sub>1-8</sub> = 4.2 Hz, *J*<sub>7-8</sub> = 4.1 Hz, **H-8**), 1.34 (t, *J* = 7.2 Hz, OCH<sub>2</sub>CH<sub>3</sub>), 1.29 (t, *J* = 7.1 Hz, OCH<sub>2</sub>CH<sub>3</sub>) ppm; <sup>13</sup>C NMR (100 MHz, CDCl<sub>3</sub>) δ 171.0 (C=O), 166.2 (C=O), 129.8 (=CH), 117.8 (=CH), 115.0 (CN), 63.0 (OCH<sub>2</sub>CH<sub>3</sub>), 61.0 (OCH<sub>2</sub>CH<sub>3</sub>), 30.8, 30.7, 30.1, 29.0, 21.4, 20.3, 14.2 (OCH<sub>2</sub>CH<sub>3</sub>), 14.1 (OCH<sub>2</sub>CH<sub>3</sub>) ppm; HRMS-EI: *m/z* [M]<sup>+</sup> calcd. for C<sub>15</sub>H<sub>17</sub>NO<sub>4</sub>: 275.1158; found: 275.1143.

**3a'**: <sup>1</sup>H NMR (400 MHz, CDCl<sub>3</sub>) δ 5.89 (dd, *J*<sub>6-5</sub> = 10.0 Hz, *J*<sub>6-7</sub> = 3.8 Hz, **H-6**), 5.85 (dd, *J*<sub>5-6</sub> = 10.0 Hz, *J*<sub>5-4</sub> = 4.6 Hz, **H-5**), 4.26 (q, *J* = 7.1 Hz, OCH<sub>2</sub>CH<sub>3</sub>), 4.17-4.07 (m, OCH<sub>2</sub>CH<sub>3</sub>), 2.62 (d, *J*<sub>2-4</sub> = 9.2 Hz, **H-2**), 2.46 (dd, *J*<sub>4-2</sub> = 9.2 Hz, *J*<sub>4-5</sub> = 4.6 Hz, **H-4**),

2.16 (dd,  $J_{8-1} = 8.8$  Hz,  $J_{8-7} = 8.8$  Hz, **H-8**), 1.95-1.89 (m, **H-1**), 1.95-1.89 (m, **H-7**), 1.34 (t,  $J = 7.1$  Hz, OCH<sub>2</sub>CH<sub>3</sub>), 1.26 (t,  $J = 7.2$  Hz, OCH<sub>2</sub>CH<sub>3</sub>) ppm; <sup>13</sup>C NMR (100 MHz, CDCl<sub>3</sub>) δ 168.6 (C=O), 166.4 (C=O), 124.5 (=CH), 121.2 (=CH), 115.4 (CN), 62.8 (OCH<sub>2</sub>CH<sub>3</sub>), 60.5 (OCH<sub>2</sub>CH<sub>3</sub>), 31.5, 30.8, 29.1, 26.1, 18.8, 16.7, 14.3 (OCH<sub>2</sub>CH<sub>3</sub>), 14.1 (OCH<sub>2</sub>CH<sub>3</sub>) ppm; HRMS-EI:  $m/z$  [M]<sup>+</sup> calcd. for C<sub>15</sub>H<sub>17</sub>NO<sub>4</sub>: 275.1158; found: 275.1147.

(*E*)-Diethyl fumarates:<sup>10</sup> <sup>1</sup>H NMR (400 MHz, CDCl<sub>3</sub>) δ 6.80 (s, 2 H), 4.22 (q,  $J = 7.2$  Hz, 4 H), 1.28 (t,  $J = 7.2$  Hz, 6 H) ppm; <sup>13</sup>C NMR (100 MHz, CDCl<sub>3</sub>) δ 164.9, 133.5, 61.2, 14.0 ppm.

(*Z*)-Diethyl fumarates:<sup>11</sup> <sup>1</sup>H NMR (400 MHz, CDCl<sub>3</sub>) δ 6.23 (s, 2 H), 4.25 (q,  $J = 7.1$  Hz, 4 H), 1.31 (t,  $J = 7.1$  Hz, 6 H) ppm; <sup>13</sup>C NMR (100 MHz, CDCl<sub>3</sub>) δ 165.3, 129.8, 61.2, 14.0 ppm.

Current Data Parameters  
 NAME zhu-57-TLC-2-major  
 EXPNO 1  
 PROCNO 1

F2 - Acquisition Parameters

Date\_ 20230516  
 Time 22.08  
 INSTRUM spect  
 PROBHD 5 mm QNP 1H/13  
 PULPROG zg30  
 TD 32768  
 SOLVENT CDC13  
 NS 160  
 DS 0  
 SWH 7211.539 Hz  
 FIDRES 0.220079 Hz  
 AQ 2.2719147 sec  
 RG 812  
 DW 69.333 usec  
 DE 6.50 usec  
 TE 291.9 K  
 D1 2.0000000 sec  
 TD0 1

==== CHANNEL f1 =====

NUC1 1H  
 P1 15.00 usec  
 PL1 0.90 dB  
 SFO1 400.1336012 MHz

F2 - Processing parameters

SI 16384  
 SF 400.1300092 MHz  
 WDW EM  
 SSB 0  
 LB 0.30 Hz  
 GB 0  
 PC 1.00

7.2600  
6.1894  
6.1773  
6.1652  
6.1531  
5.6658  
5.6535  
5.6416  
5.6292  
4.2932  
4.2754  
4.2576  
4.2400  
4.2334  
4.2237  
4.1747  
4.1568  
4.1390  
4.1212  
2.6753  
2.6527  
2.2957  
2.2832  
2.2730  
2.2606  
2.2185  
2.2085  
2.1967

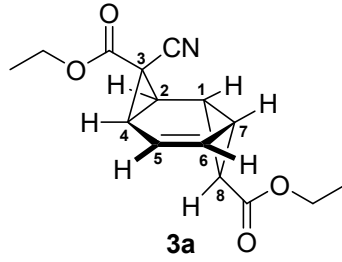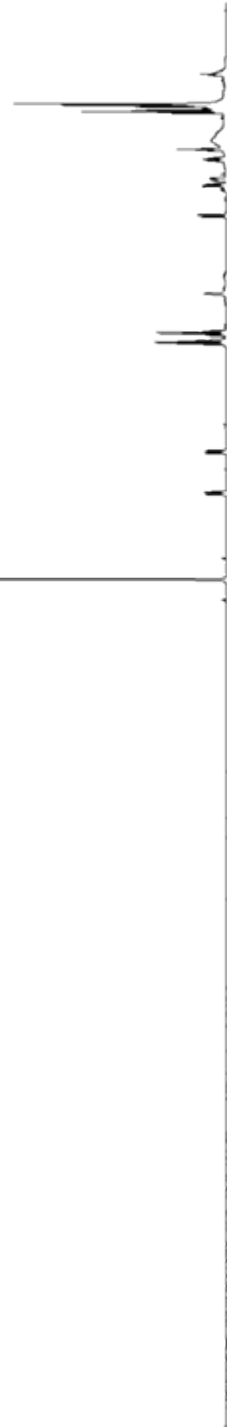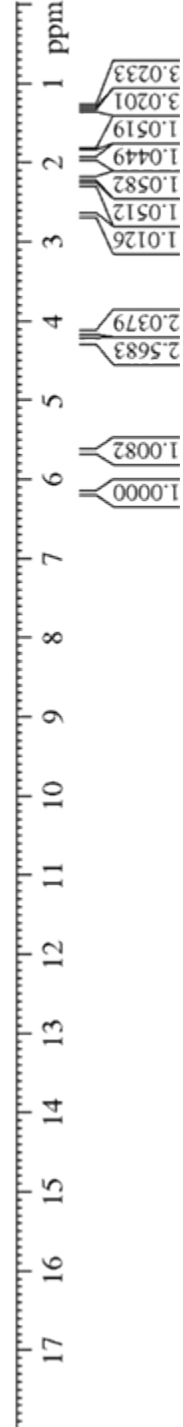

Current Data Parameters  
 NAME zhu-57-TLC-2-major  
 EXPNO 2  
 PROCNO 1

F2 - Acquisition Parameters  
 Date\_ 20230516  
 Time 22.24

INSTRUM spect  
 PROBHID 5 mm QNP 1H/13  
 PULPROG zgpg30  
 TD 65536  
 SOLVENT CDCl3  
 NS 10892  
 DS 0  
 SWH 25252.525 Hz  
 FIDRES 0.385323 Hz  
 AQ 1.2976128 sec  
 RG 1620  
 DW 19.800 usec  
 DE 6.50 usec  
 TE 292.2 K  
 D1 2.00000000 sec  
 d11 0.03000000 sec  
 DELTA 1.89999998 sec  
 TD0 1

==== CHANNEL f1 =====  
 NUC1 13C  
 P1 10.00 usec  
 PL1 6.20 dB  
 SFO1 100.6243395 MHz

==== CHANNEL f2 =====  
 CPDPRG2 walz16  
 NUC2 1H  
 PCPD2 90.00 usec  
 PL2 -0.40 dB  
 PL12 15.80 dB  
 PL13 18.50 dB  
 SFO2 400.1316005 MHz

F2 - Processing parameters  
 SI 32768  
 SF 100.6127723 MHz  
 WDW EM  
 SSB 0  
 LB 1.00 Hz  
 GB 0  
 PC 1.40

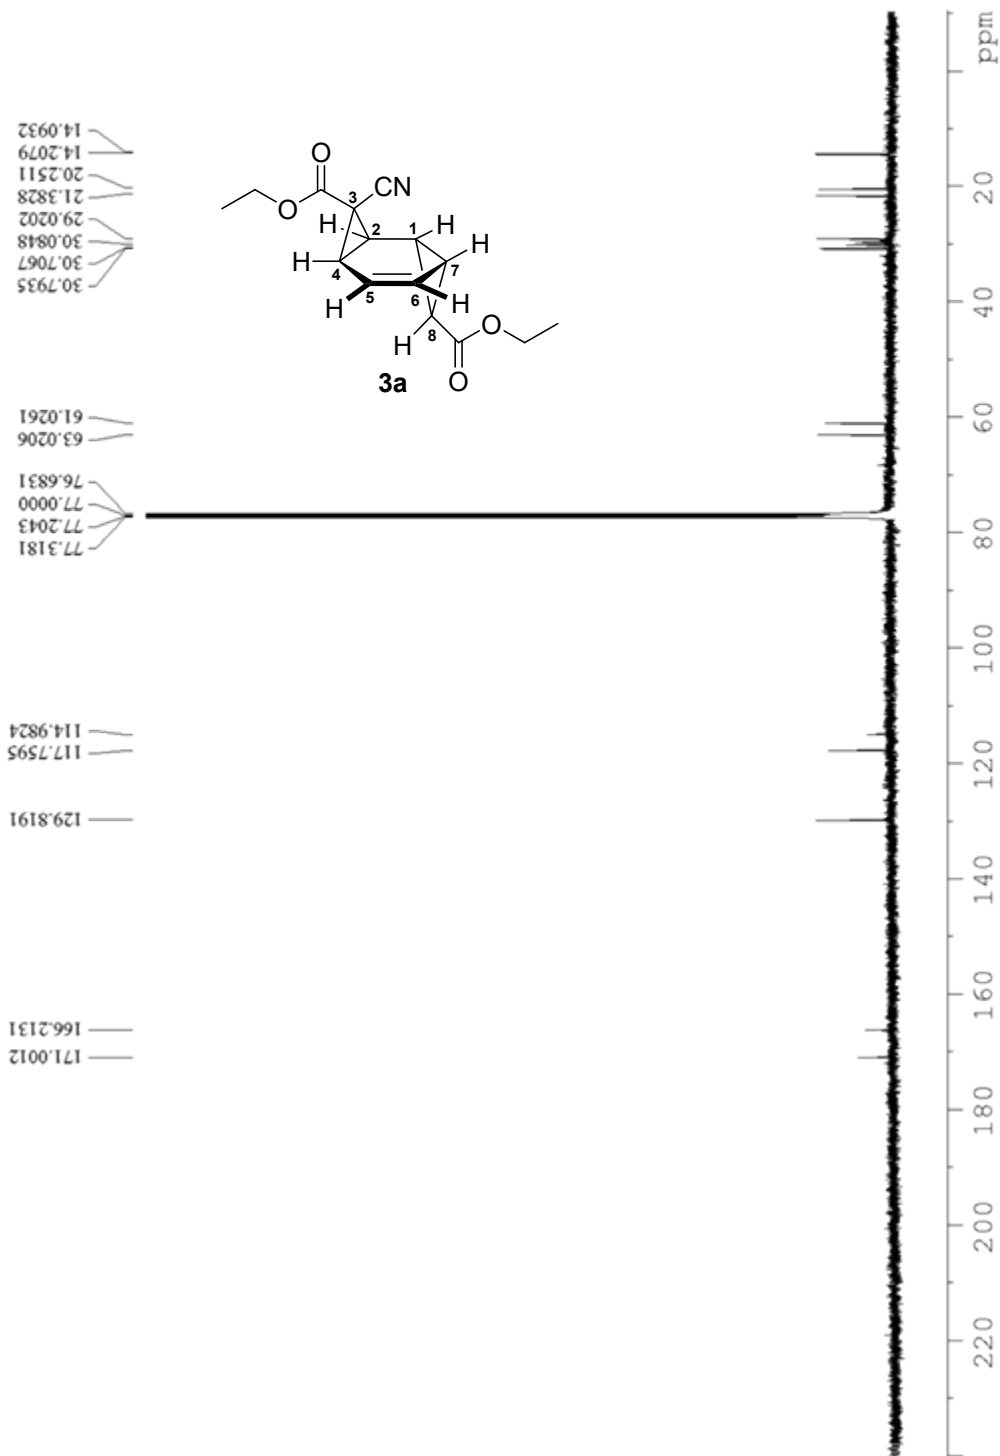

H-H COSY of **3a** (600 MHz):

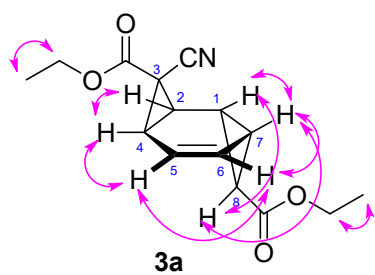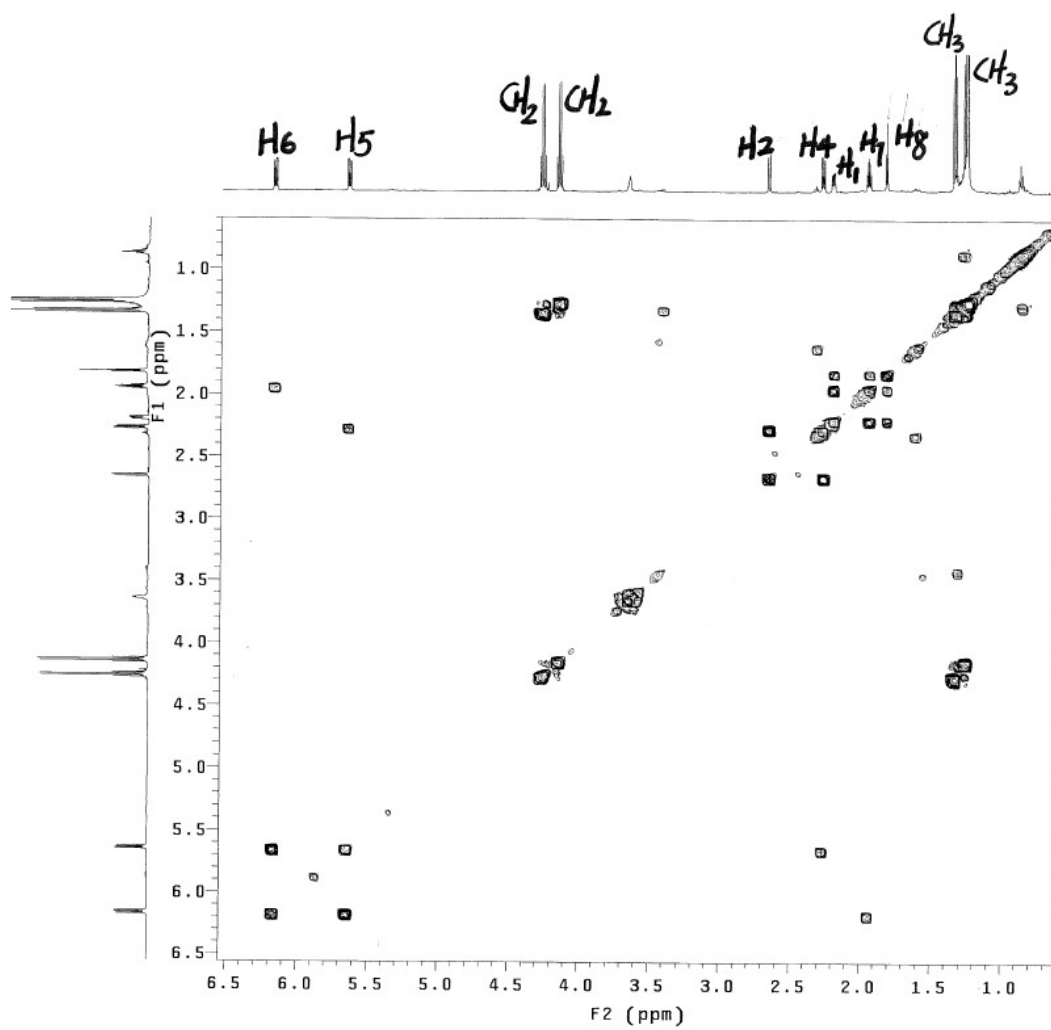

NOESY spectrum of **3a** (600 MHz):

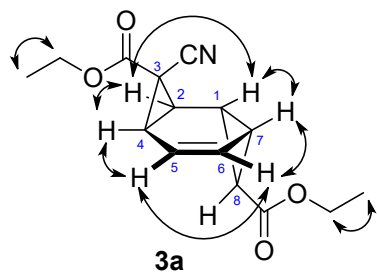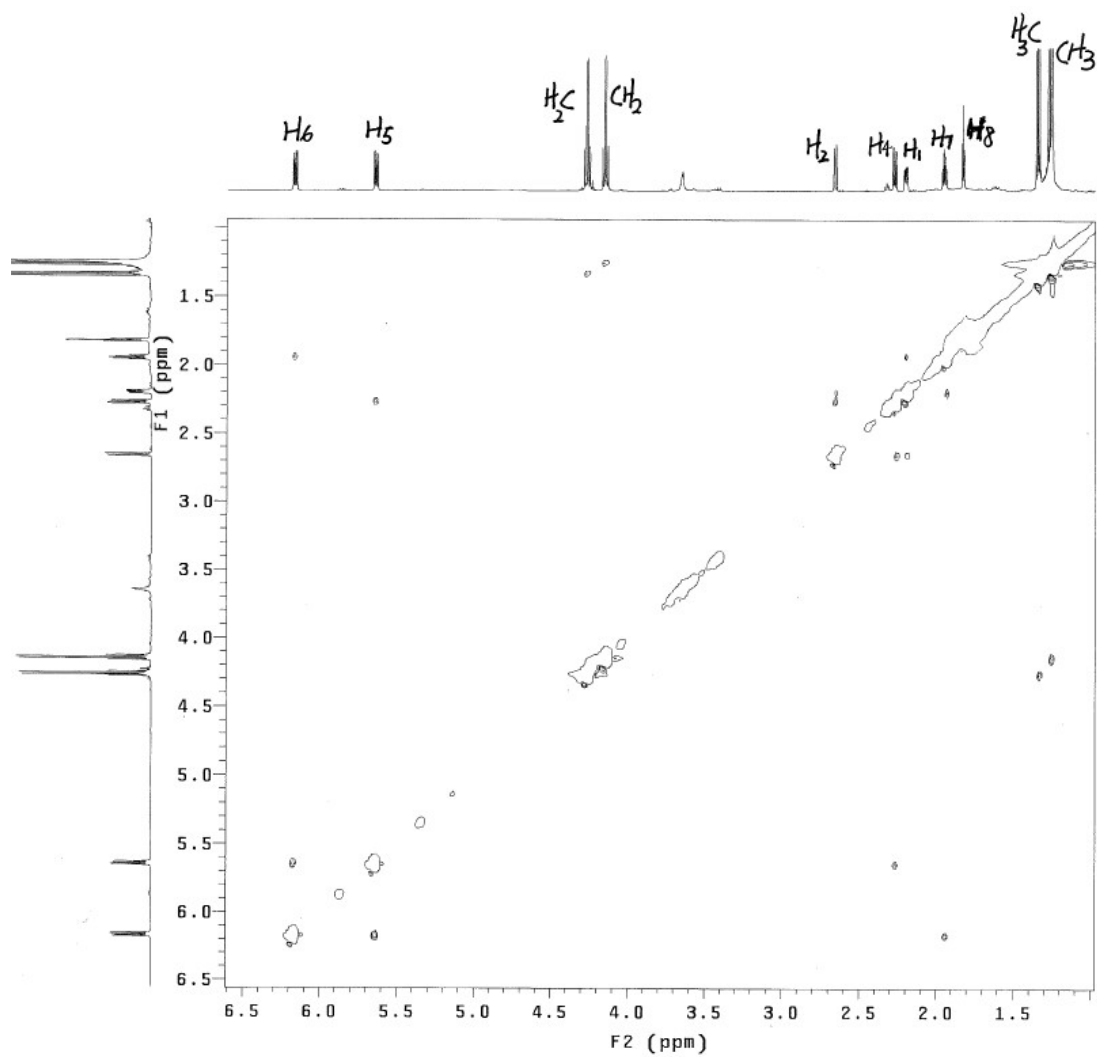



Current Data Parameters  
 NAME zhu-57-3-minor  
 EXPNO 2  
 PROCNO 1

F2 - Acquisition Parameters  
 Date\_ 20230518  
 Time 22.07  
 INSTRUM spect  
 PROBHD 5 mm QNP 1H/13  
 PULPROG zg30  
 TD 32768  
 SOLVENT CDC13  
 NS 320  
 DS 0  
 SWH 7211.539 Hz  
 FIDRES 0.220079 Hz  
 AQ 2.2719147 sec  
 RG 645  
 DW 69.333 usec  
 DE 6.50 usec  
 TE 292.4 K  
 D1 2.00000000 sec  
 TD0 1

==== CHANNEL f1 =====  
 NUC1 1H  
 P1 15.00 usec  
 PL1 0.90 dB  
 SFO1 400.1336012 MHz

F2 - Processing parameters  
 SI 16384  
 SF 400.1300093 MHz  
 WDW EM  
 SSB 0  
 LB 0.30 Hz  
 GB 0  
 PC 1.00

7.2600  
5.9068  
5.8972  
5.8830  
5.8701  
5.8583  
5.8458  
5.8343  
4.2884  
4.2706  
4.2528  
4.2348  
4.1901  
4.1722  
4.1630  
4.1531  
4.1452  
4.1347  
4.1273  
4.1169  
4.1090  
4.0992  
4.0900  
4.0720  
4.0220  
2.6334  
2.6104  
2.4738  
2.4624  
2.4508

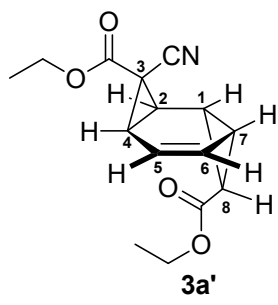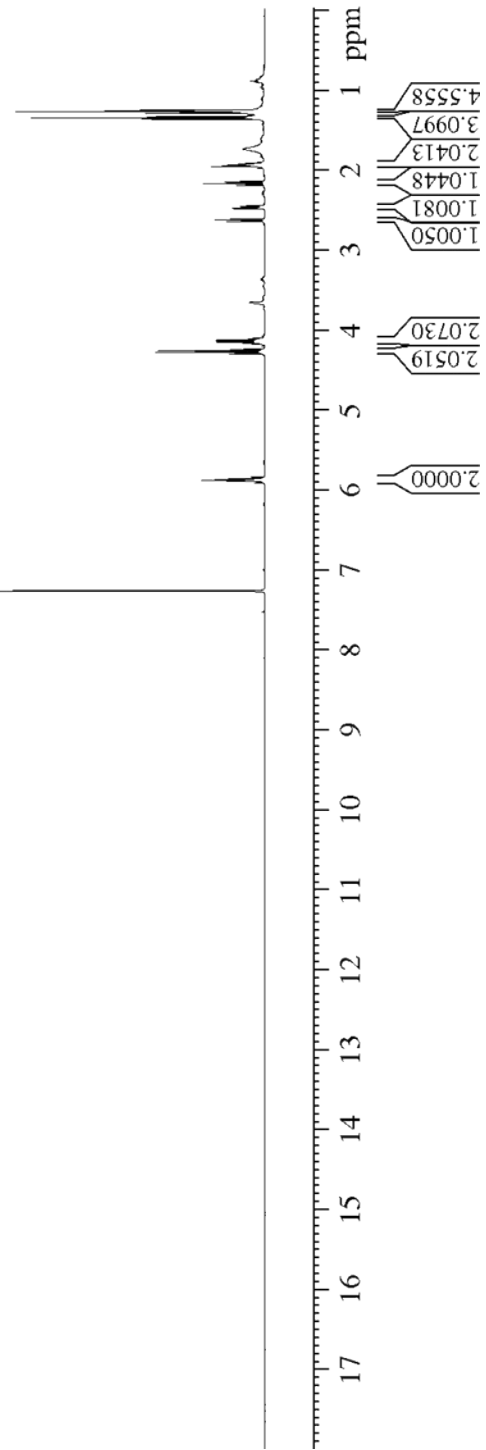

Current Data Parameters  
 NAME zhu-57-3-minor  
 EXPNO 3  
 PROCNO 1

F2 - Acquisition Parameters  
 Date\_ 20230518  
 Time 22.36  
 INSTRUM spect  
 PROBHD 5 mm QNP 1H/13  
 PULPROG zgpg30  
 TD 65536  
 SOLVENT CDCl3  
 NS 10704  
 DS 0  
 SWH 25252.525 Hz  
 FIDRES 0.385323 Hz  
 AQ 1.2976128 sec  
 RG 1620  
 DW 19.800 usec  
 DE 6.50 usec  
 TE 293.0 K  
 D1 2.00000000 sec  
 d11 0.03000000 sec  
 DELTA 1.89999998 sec  
 TD0 1

==== CHANNEL f1 =====  
 NUC1 13C  
 P1 10.00 usec  
 PL1 6.20 dB  
 SFO1 100.6243395 MHz

==== CHANNEL f2 =====  
 CPDPRG2 waltz16  
 NUC2 1H  
 PCPD2 90.00 usec  
 PL2 -0.40 dB  
 PL12 15.80 dB  
 PL13 18.50 dB  
 SFO2 400.1316005 MHz

F2 - Processing parameters  
 SI 32768  
 SF 100.612728 MHz  
 WDW EM  
 SSB 0  
 LB 1.00 Hz  
 GB 0  
 PC 1.40

14.1192  
 14.2793  
 16.6952  
 18.7593  
 26.0591  
 29.0612  
 30.7544  
 31.5412  
 60.5106  
 62.7931  
 76.6818  
 77.0000  
 77.2030  
 77.3170  
 115.3932  
 121.2052  
 124.4672  
 166.3984  
 168.5939

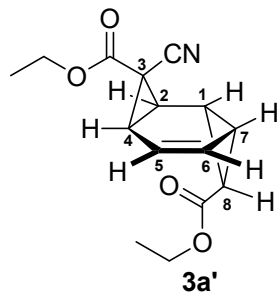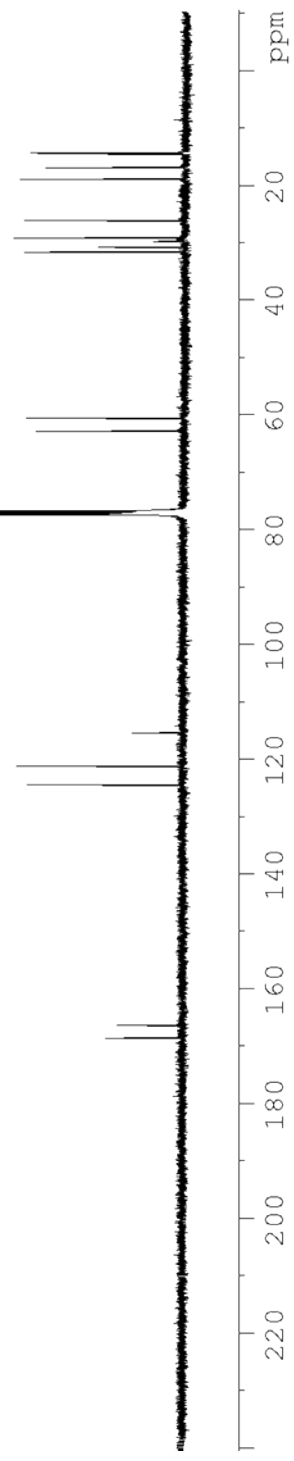

H-H COSY spectrum of **3a'** (600 MHz):

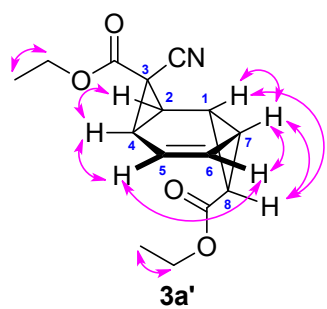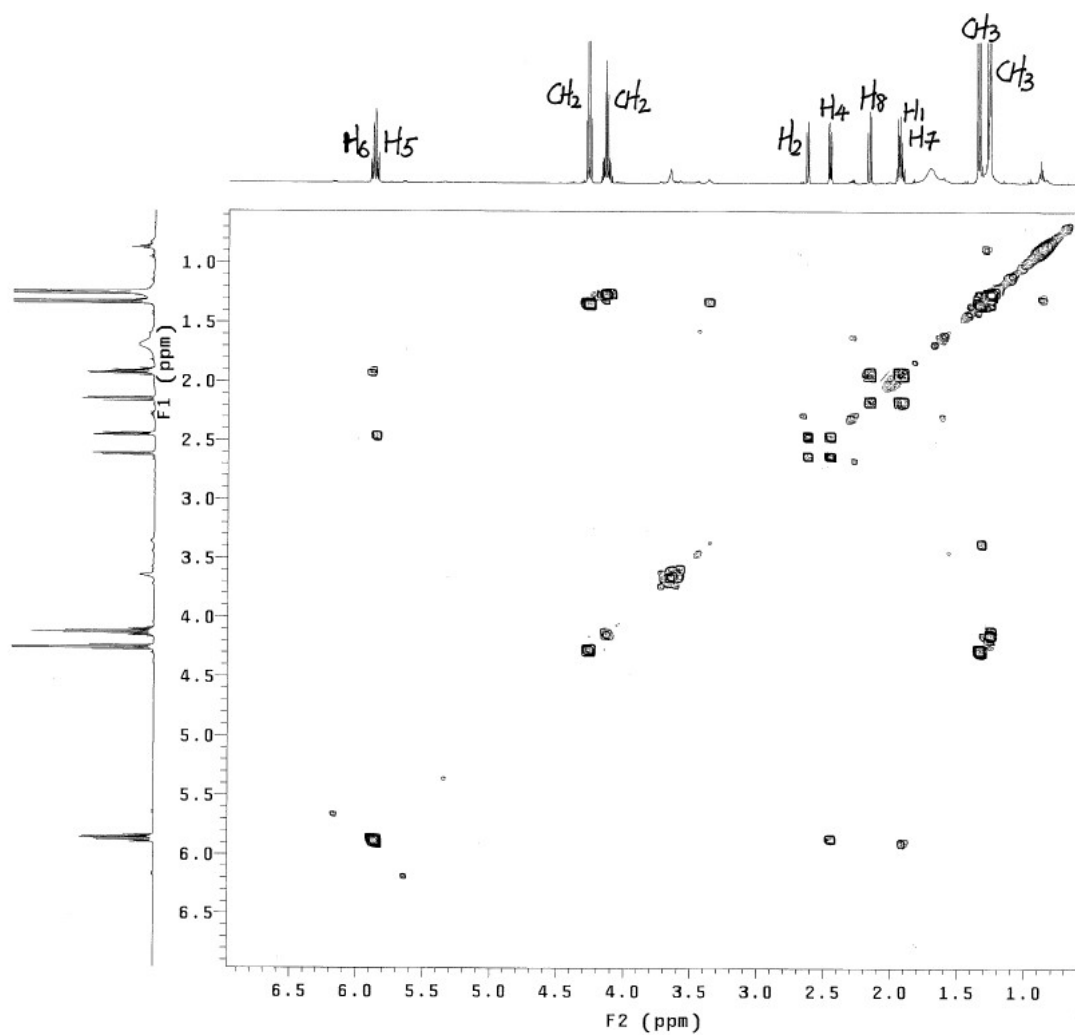

NOESY spectrum of **3a'** (600 MHz):

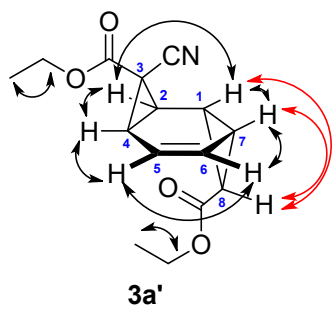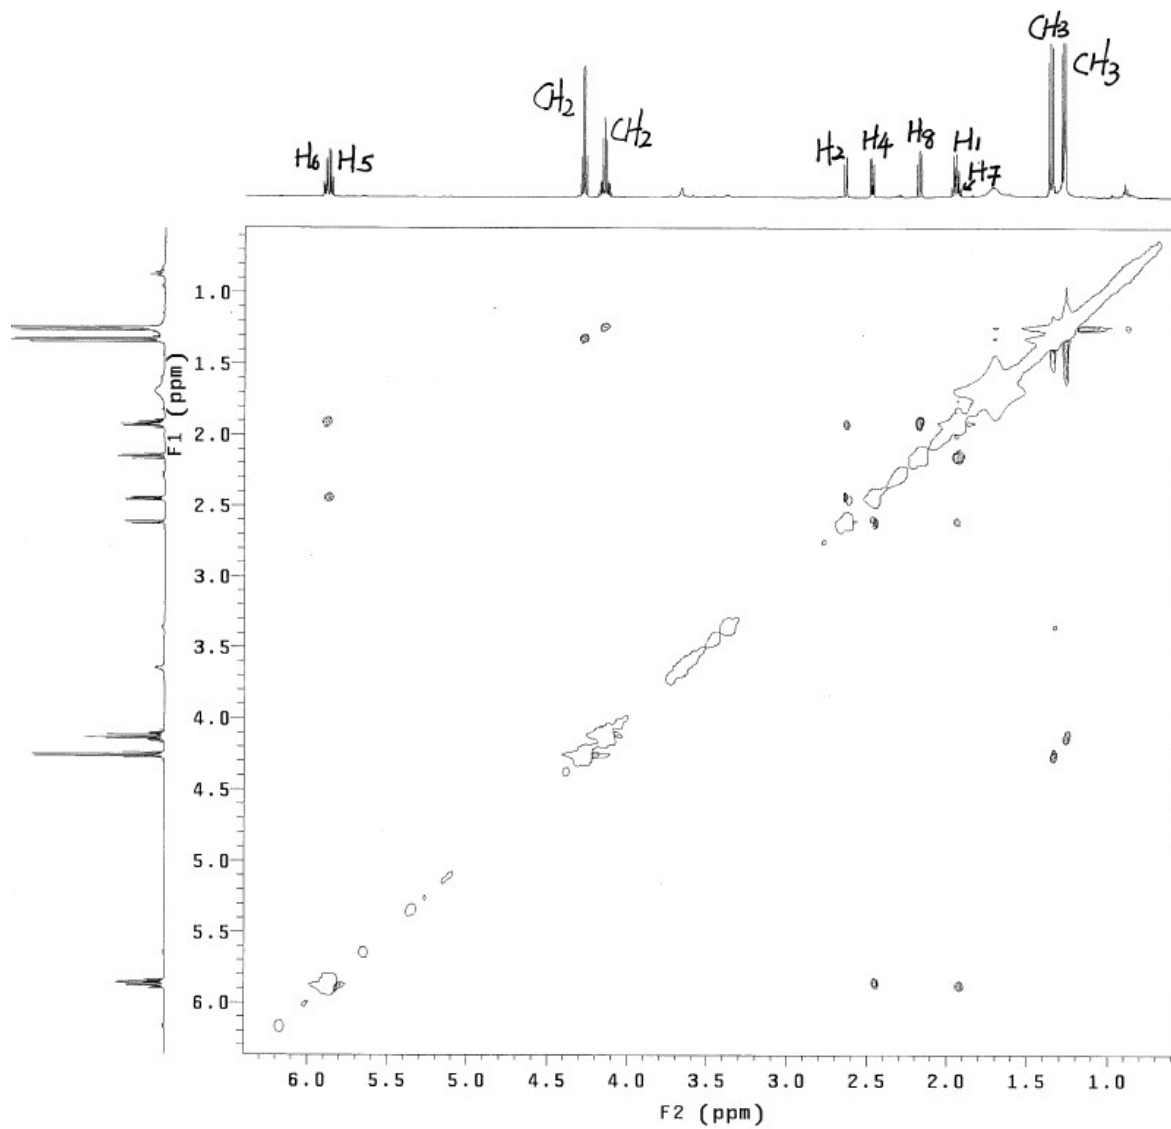

Current Data Parameters  
NAME zhu-50-1  
EXPNO 1  
PROCNO 1

F2 - Acquisition Parameters  
Date\_ 20230329  
Time 13.48  
INSTRUM spect  
PROBHD 5 mm QNP 1H/13  
PULPROG zg30  
TD 32768  
SOLVENT CDCl3  
NS 57  
DS 0  
SWH 7211.539 Hz  
FIDRES 0.220079 Hz  
AQ 2.2719147 sec  
RG 64  
DW 69.333 usec  
DE 6.50 usec  
TE 291.3 K  
D1 2.00000000 sec  
TD0 1

==== CHANNEL f1 =====  
NUC1 1H  
P1 15.00 usec  
PL1 0.90 dB  
SFO1 400.1336012 MHz

F2 - Processing parameters  
SI 16384  
SF 400.1300092 MHz  
WDW EM  
SSB 0  
LB 0.30 Hz  
GB 0  
PC 1.00

1.2937  
1.2758  
1.2579

4.2423  
4.2245  
4.2066  
4.1887

7.2600  
6.8060

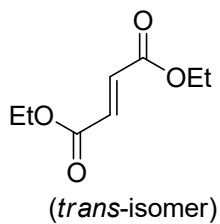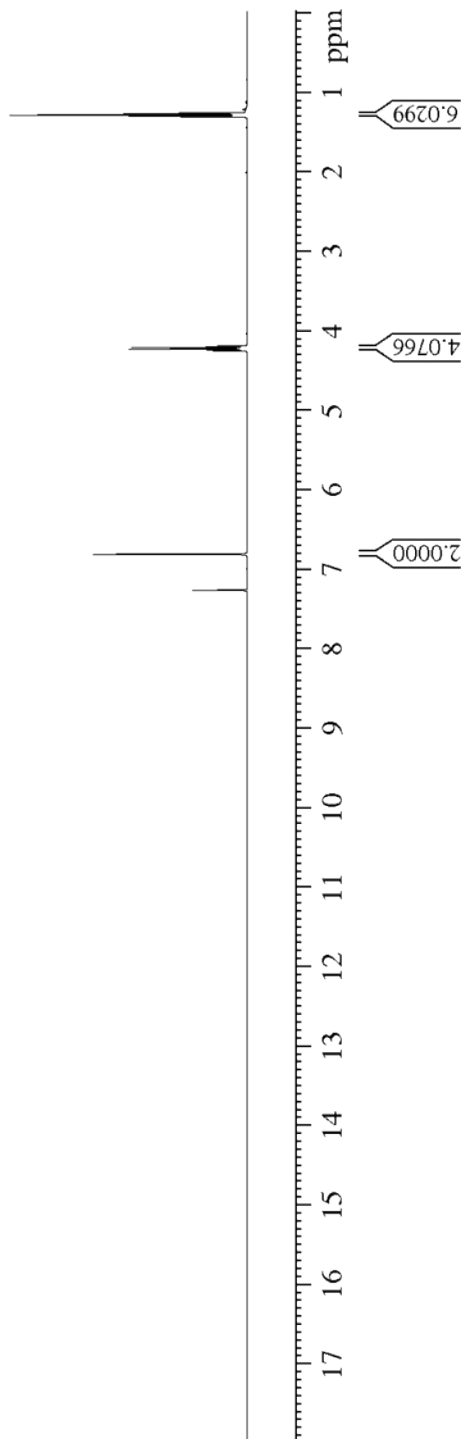

Current Data Parameters  
 NAME zhu-50-1  
 EXPNO 2  
 PROCNO 1

F2 - Acquisition Parameters  
 Date\_ 20230329  
 Time 13.55  
 INSTRUM spect  
 PROBHD 5 mm QNP 1H/13  
 PULPROG zgpg30  
 TD 65536  
 SOLVENT CDCl3  
 NS 400  
 DS 0  
 SWH 25252.525 Hz  
 FIDRES 0.385323 Hz  
 AQ 1.2976128 sec  
 RG 2050  
 DW 19.800 usec  
 DE 6.50 usec  
 TE 291.7 K  
 D1 2.00000000 sec  
 d11 0.03000000 sec  
 DELTA 1.89999998 sec  
 TD0 1

==== CHANNEL f1 =====  
 NUC1 13C  
 P1 10.00 usec  
 PL1 6.20 dB  
 SFO1 100.6243395 MHz

==== CHANNEL f2 =====  
 CPDPRG[2] waltz16  
 NUC2 1H  
 PCPD2 90.00 usec  
 PL2 -0.40 dB  
 PL12 15.80 dB  
 PL13 18.50 dB  
 SFO2 400.1316005 MHz

F2 - Processing parameters  
 SI 32768  
 SF 100.6127774 MHz  
 WDW EM  
 SSB 0  
 LB 1.00 Hz  
 GB 0  
 PC 1.40

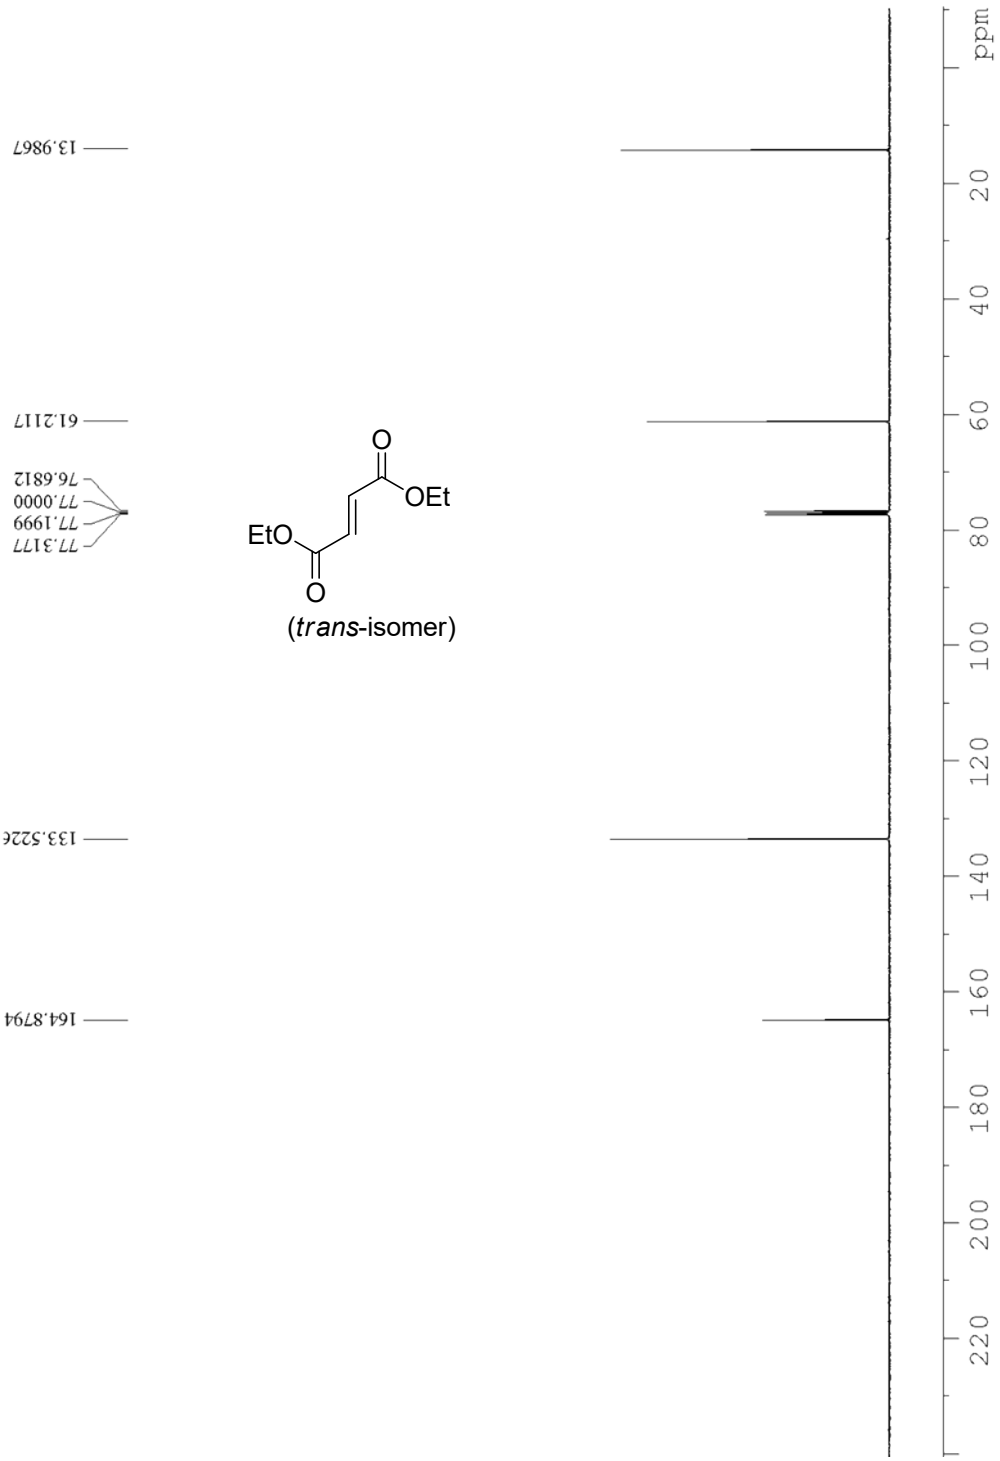

Current Data Parameters  
NAME zhu-50-2  
EXPNO 3  
PROCNO 1

F2 - Acquisition Parameters  
Date\_ 20230406  
Time 10.54  
INSTRUM spect  
PROBHD 5 mm QNP 1H/13  
PULPROG zg30  
TD 32768  
SOLVENT CDCl3  
NS 41  
DS 0  
SWH 7211.539 Hz  
FIDRES 0.220079 Hz  
AQ 2.2719147 sec  
RG 322  
DW 69.333 usec  
DE 6.50 usec  
TE 292.8 K  
D1 2.00000000 sec  
TD0 1

=====  
CHANNEL f1  
NUC1 1H  
P1 15.00 usec  
PL1 0.90 dB  
SFO1 400.1336012 MHz

F2 - Processing parameters  
SI 16384  
SF 400.1300096 MHz  
WDW EM  
SSB 0  
LB 0.30 Hz  
GB 0  
PC 1.00

1.3242  
1.3065  
1.2886

4.2748  
4.2570  
4.2392  
4.2213

6.2308

7.2600

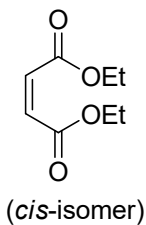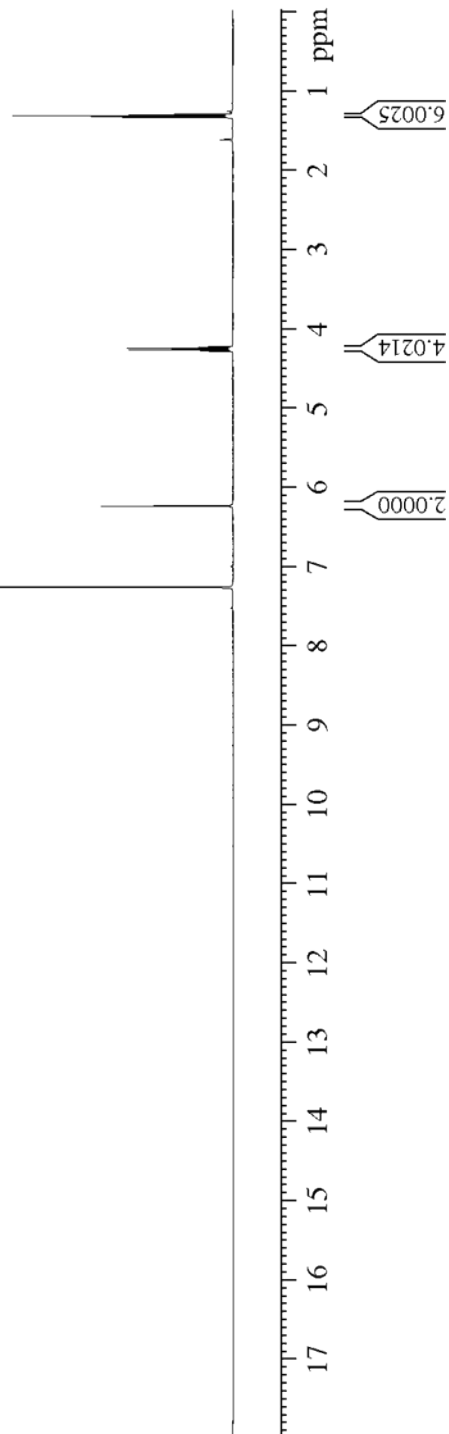

Current Data Parameters  
NAME zhu-50-2  
EXPNO 4  
PROCNO 1

F2 - Acquisition Parameters  
Date\_ 20230406  
Time 11:00  
INSTRUM spect  
PROBHD 5 mm QNP 1H/13  
PULPROG zgpg30  
TD 65536  
SOLVENT CDCl3  
NS 400  
DS 0  
SWH 25252.525 Hz  
FIDRES 0.385323 Hz  
AQ 1.2976128 sec  
RG 2050  
DW 19.800 usec  
DE 6.50 usec  
TE 293.2 K  
D1 2.00000000 sec  
d11 0.03000000 sec  
DELTA 1.89999998 sec  
TD0 1

===== CHANNEL f1 =====  
NUC1 13C  
P1 10.00 usec  
PL1 6.20 dB  
SFO1 100.6243395 MHz

===== CHANNEL f2 =====  
CPDPRG2 waltz16  
NUC2 1H  
PCPD2 90.00 usec  
PL2 -0.40 dB  
PL12 15.80 dB  
PL13 18.50 dB  
SFO2 400.1316005 MHz

F2 - Processing parameters  
SI 32768  
SF 100.6127730 MHz  
WDW EM  
SSB 0  
LB 1.00 Hz  
GB 0  
PC 1.40

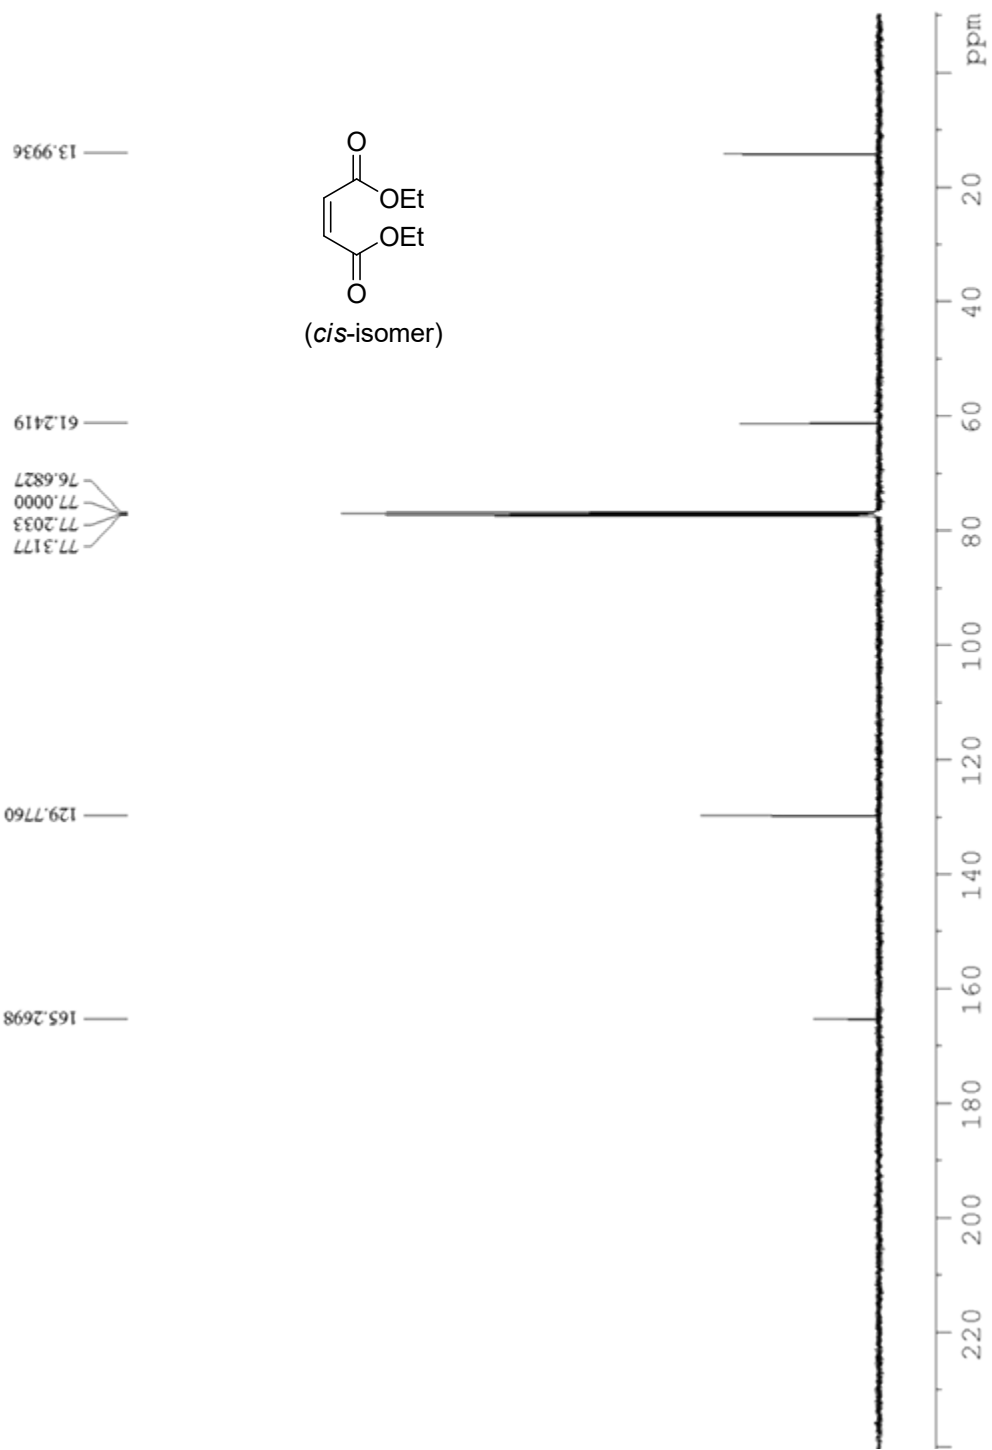



## 5) Formation and NMR Spectra of **3b/4/5**

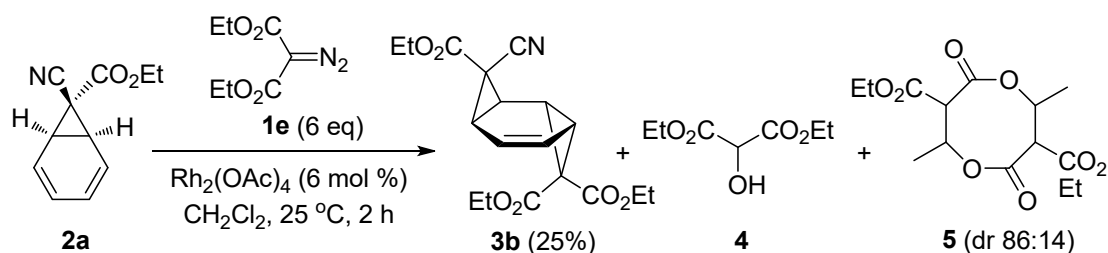

Following the same procedure described for the preparation of **3a/3a'**, the titled compounds were obtained from the reaction of **2a** (57 mg, 0.30 mmol) with **1e** (336.5 mg, 1.81 mmol, 6.0 equiv relative to **2a**) in the presence of  $\text{Rh}_2(\text{OAc})_4$  (8.1 mg, 99%, 0.018 mmol, 0.06 equiv relative to **2a**). After slow addition of **1e** over 1 h and stirring for an additional 1 h, the reaction mixture was concentrated under vacuo and subjected to flash column chromatography (silica gel; hexane/ethyl acetate = 10:1, 6:1) to give 39 mg of the mixed **3b** and **4** (**3b**: 26 mg, 25%; **4**: 13 mg; determined by integrals of the  $^1\text{H}$  NMR resonances) along with **5** (191 mg, dr: 86:14).

(1*R*\*,2*S*\*,4*R*\*,7*R*\*,8*S*\*)-Triethyl-8-cyanotricyclo[5.1.0.02,4]oct-5-ene-3,3,8-tricarboxylate (**3b**) and Diethyl 2-hydroxymalonate (**4**)<sup>12</sup>

$^1\text{H}$  NMR (400 MHz,  $\text{CDCl}_3$ ) **3b**:  $\delta$  6.04 (dd,  $J = 9.7, 4.5$  Hz, 1 H, =CH), 5.75 (dd,  $J = 9.7, 5.1$  Hz, 1 H, =CH), 4.35-4.12 (m, 6 H,  $\text{OCH}_2$ ), 2.34-2.26 (m, 4 H, CH), 1.29 (t,  $J = 7.6$  Hz, 3 H,  $\text{CH}_3$ ), 1.27 (t,  $J = 7.2$  Hz, 6 H,  $\text{CH}_3 \times 2$ ) ppm; **4**:  $\delta$  4.35-4.12 (m, 4 H,  $\text{CH}_2$ ), 3.55 (s, 1 H, CH), 1.36 (t,  $J = 7.2$  Hz, 6 H,  $\text{CH}_3$ ) ppm;  $^{13}\text{C}$  NMR (100 MHz,  $\text{CDCl}_3$ ) **3b**:  $\delta$  168.1 (C=O), 166.0 (C=O), 165.2 (C=O), 126.2 (=C-H), 120.0 (=C-H), 114.8 (CN), 63.0 ( $\text{CH}_2$ ), 62.2 ( $\text{CH}_2$ ), 61.6 ( $\text{CH}_2$ ), 41.2, 29.9, 29.6, 29.5, 24.6, 23.8, 14.1 (x 2,  $\text{CH}_3$ ), 14.0 ( $\text{CH}_3$ ) ppm; **4**:  $\delta$  165.6 (C=O), 72.2 (CH), 62.7 ( $\text{CH}_2$ ), 13.9 ( $\text{CH}_3$ ) ppm.

Diethyl 2,6-dimethyl-4,8-dioxo-1,5-dioxocane-3,7-dicarboxylate (**5**)<sup>13</sup>

$^1\text{H}$  NMR (400 MHz,  $\text{CDCl}_3$ ) major:  $\delta$  4.96 (qd,  $J = 6.2, 4.3, 2$  H), 4.26 (q,  $J = 7.1$  Hz, 4 H), 4.10 (d,  $J = 4.3$  Hz, 2 H), 1.62 (d,  $J = 6.2$  Hz, 6 H), 1.29 (t,  $J = 7.1$  Hz, 6 H) ppm; minor  $\delta$  4.88 (dq,  $J = 7.0, 6.3$  Hz, 2 H), 4.57 (d,  $J = 7.0$  Hz, 2 H), 4.25 (q,  $J = 7.1$  Hz, 4 H), 1.58 (d,  $J = 6.3$  Hz, 6 H), 1.27 (t,  $J = 7.1$  Hz, 6 H) ppm;  $^{13}\text{C}$  NMR (100 MHz,  $\text{CDCl}_3$ ) major:  $\delta$  164.2 (C=O), 162.6 (C=O), 71.2 (CH), 62.4 ( $\text{CH}_2$ ), 61.6 (CH), 19.7 ( $\text{CH}_3$ ), 14.0 ( $\text{CH}_3$ ) ppm; minor:  $\delta$  164.0 (C=O), 163.2 (C=O), 70.1 (CH), 62.1 ( $\text{CH}_2$ ), 58.3 (CH), 16.5 ( $\text{CH}_3$ ), 14.1 ( $\text{CH}_3$ ) ppm.

Current Data Parameters  
 NAME zhu-53-3-TLC  
 EXPNO 1  
 PROCNO 1

F2 - Acquisition Parameters  
 Date\_ 20230628  
 Time 22.10  
 INSTRUM spect  
 PROBHD 5 mm QNP 1H/13  
 PULPROG zg30  
 TD 32768  
 SOLVENT CDCl3  
 NS 162  
 DS 0  
 SWH 7211.539 Hz  
 FIDRES 0.220079 Hz  
 AQ 2.2719147 sec  
 RG 575  
 DW 69.333 usec  
 DE 6.50 usec  
 TE 293.2 K  
 D1 2.00000000 sec  
 TD0 1

==== CHANNEL f1 =====  
 NUC1 1H  
 P1 15.00 usec  
 PL1 0.90 dB  
 SFO1 400.1336012 MHz

F2 - Processing parameters  
 SI 16384  
 SF 400.1300092 MHz  
 WDW EM  
 SSB 0  
 LB 0.30 Hz  
 GB 0  
 PC 1.00

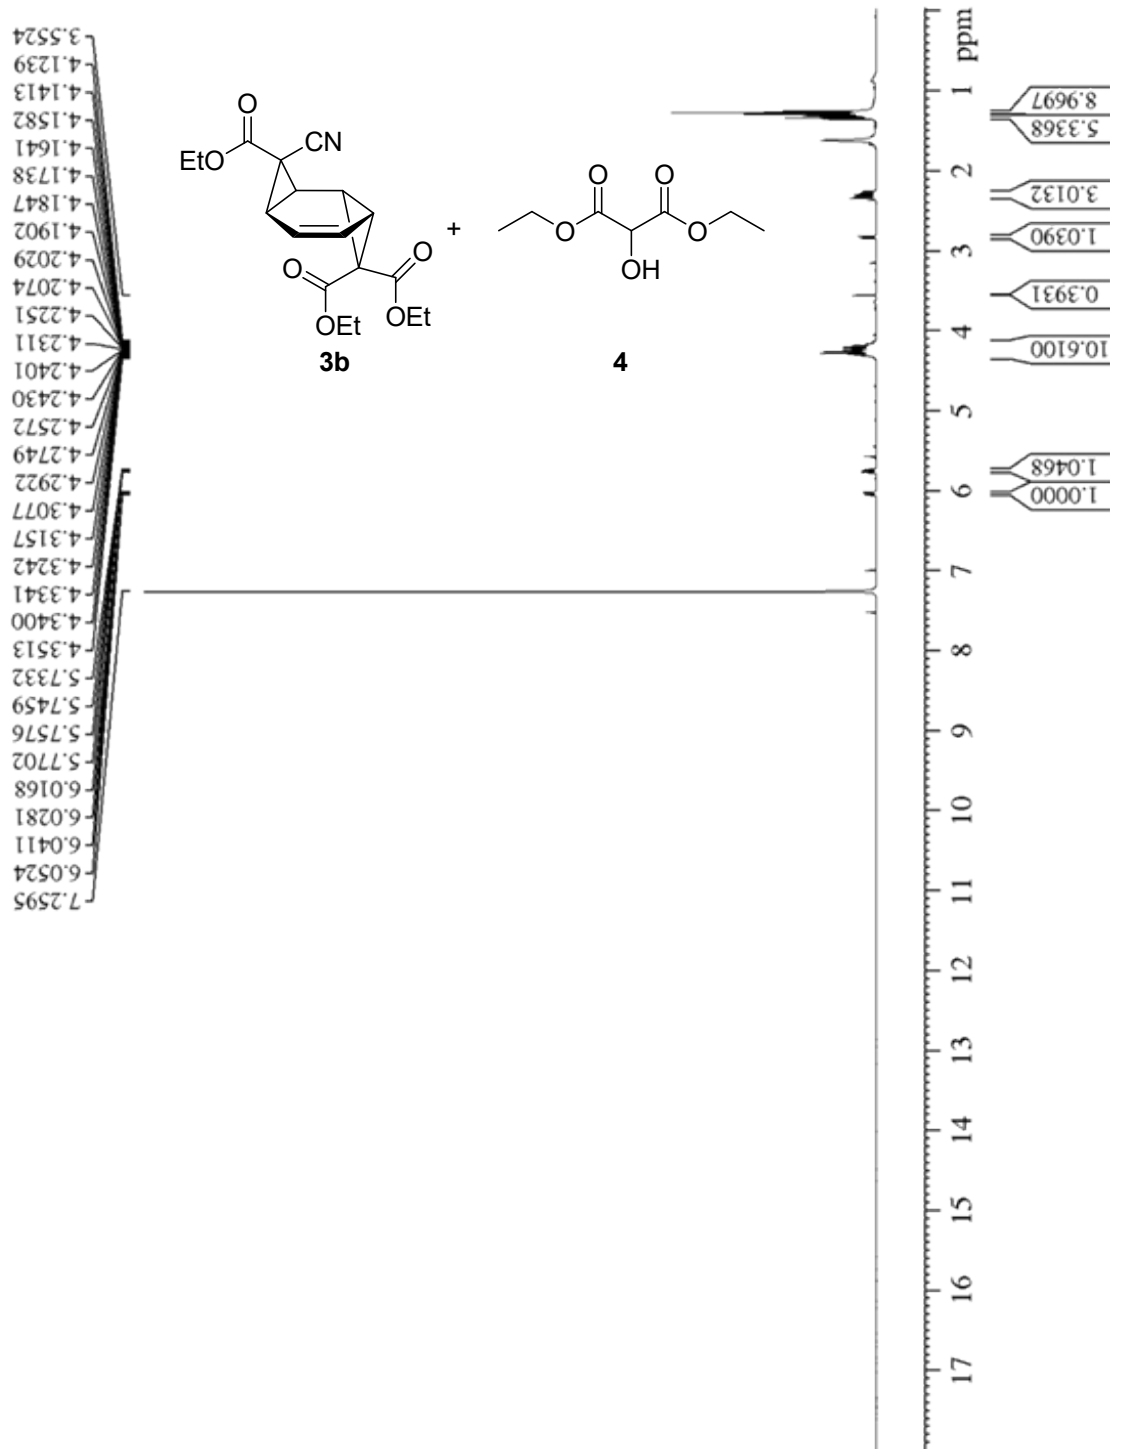

Current Data Parameters  
 NAME zhu-53-3-TLC  
 EXPNO 2  
 PROCNO 1

F2 - Acquisition Parameters  
 Date\_ 20230628  
 Time 22.40  
 INSTRUM spect  
 PROBHID 5 mm QNP 1H/13  
 PULPROG zgpg30  
 TD 65536  
 SOLVENT CDCl3  
 NS 10469  
 DS 0  
 SWH 25252.525 Hz  
 FIDRES 0.385323 Hz  
 AQ 1.2976128 sec  
 RG 2050  
 DW 19.800 usec  
 DE 6.50 usec  
 TE 293.3 K  
 D1 2.00000000 sec  
 d11 0.03000000 sec  
 DELTA 1.89999998 sec  
 TD0 1

===== CHANNEL f1 =====  
 NUC1 13C  
 P1 10.00 usec  
 PL1 6.20 dB  
 SFO1 100.6243395 MHz

===== CHANNEL f2 =====  
 CPDPRG2 waltz16  
 NUC2 1H  
 PCPD2 90.00 usec  
 PL2 -0.40 dB  
 PL12 15.80 dB  
 PL13 18.50 dB  
 SFO2 400.1316005 MHz

F2 - Processing parameters  
 SI 32768  
 SF 100.6127724 MHz  
 WDW EM  
 SSB 0  
 LB 1.00 Hz  
 GB 0  
 PC 1.40

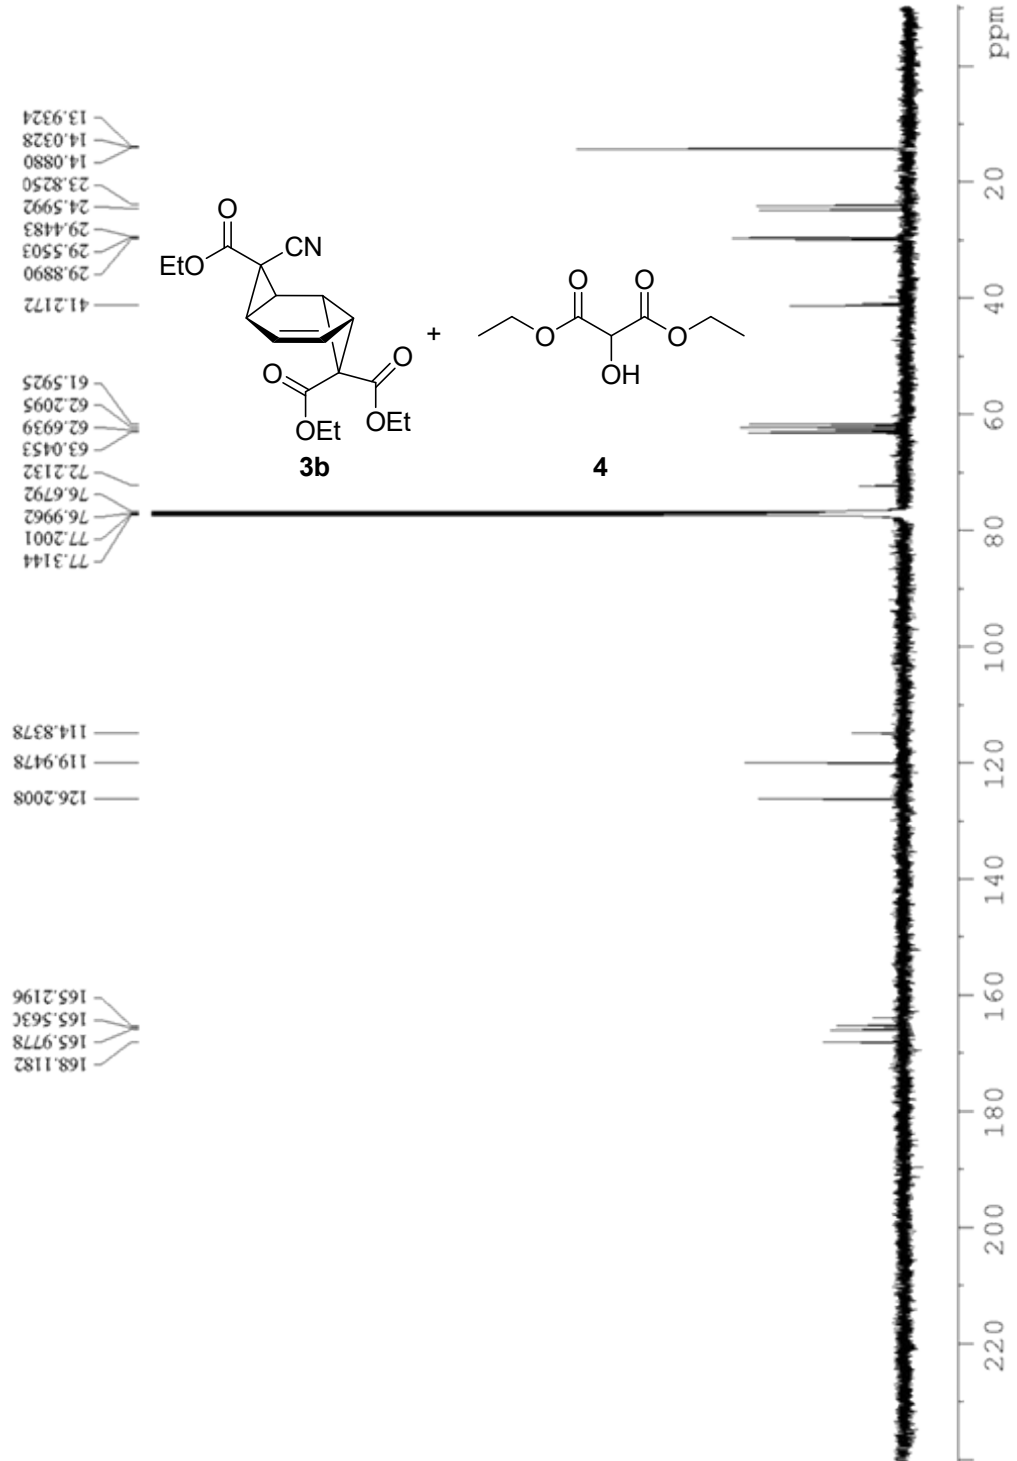

Current Data Parameters  
 NAME zhu-55-2  
 EXPNO 2  
 PROCNO 1

F2 - Acquisition Parameters  
 Date\_ 20230424  
 Time 11.27  
 INSTRUM spect  
 PROBHD 5 mm QNP 1H/13  
 PULPROG zg30  
 TD 32768  
 SOLVENT CDCl3  
 NS 80  
 DS 0  
 SWH 7211.539 Hz  
 FIDRES 0.220079 Hz  
 AQ 2.2719147 sec  
 RG 228  
 DW 69.333 usec  
 DE 6.50 usec  
 TE 291.7 K  
 D1 2.00000000 sec  
 TD0 1

==== CHANNEL f1 =====  
 NUC1 1H  
 P1 15.00 usec  
 PL1 0.90 dB  
 SFO1 400.1336012 MHz

F2 - Processing parameters  
 SI 16384  
 SF 400.1300089 MHz  
 WDW EM  
 SSB 0  
 LB 0.30 Hz  
 GB 0  
 PC 1.00

1.5908  
1.6228  
1.6382  
4.0927  
4.1035  
4.2368  
4.2547  
4.2618  
4.2726  
4.2792  
4.2904  
4.5690  
4.5861  
4.8483  
4.8644  
4.8805  
4.8966  
4.9128  
4.9365  
4.9519  
4.9629  
4.9672  
4.9783  
4.9937  
7.2600

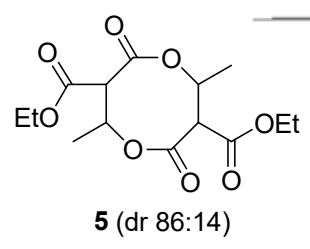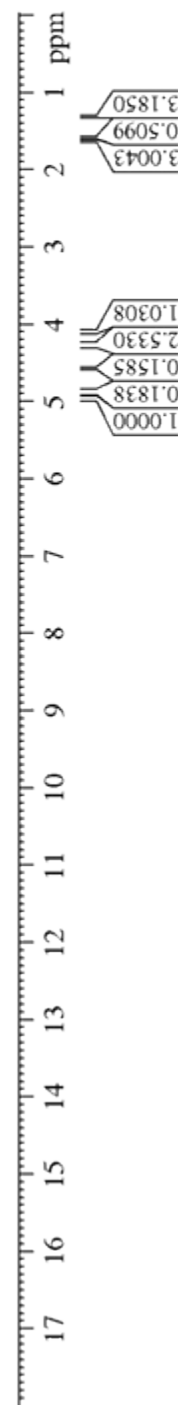

Current Data Parameters  
 NAME zhu-55-2  
 EXPNO 3  
 PROCNO 1

F2 - Acquisition Parameters  
 Date\_ 20230424  
 Time\_ 11:41  
 INSTRUM spect  
 PROBHD 5 mm QNP 1H/13  
 PULPROG zgpg30  
 TD 65536  
 SOLVENT CDCl3  
 NS 260  
 DS 0  
 SWH 25252.525 Hz  
 FIDRES 0.385323 Hz  
 AQ 1.2976128 sec  
 RG 1820  
 DW 19.800 usec  
 DE 6.50 usec  
 TE 292.2 K  
 D1 2.00000000 sec  
 d11 0.03000000 sec  
 DELTA 1.89999998 sec  
 TDO 1

==== CHANNEL f1 =====  
 NUC1 13C  
 P1 10.00 usec  
 PL1 6.20 dB  
 SFO1 100.6243395 MHz

==== CHANNEL f2 =====  
 CPDPRG2 waltz16  
 NUC2 1H  
 PCPD2 90.00 usec  
 PL2 -0.40 dB  
 PL12 15.80 dB  
 PL13 18.50 dB  
 SFO2 400.1316005 MHz

F2 - Processing parameters  
 SI 32768  
 SF 100.6127743 MHz  
 WDW EM  
 SSB 0  
 LB 1.00 Hz  
 GB 0  
 PC 1.40

14.0178  
 14.1081  
 16.5398  
 19.6902  
 58.2675  
 61.6350  
 62.1442  
 62.4332  
 70.1348  
 71.1750  
 76.6816  
 77.0000  
 77.2022  
 77.3171

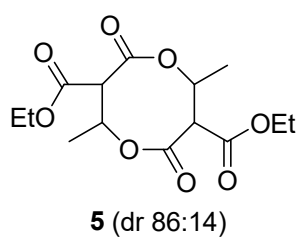

162.5583  
 163.2081  
 164.0121  
 164.2295

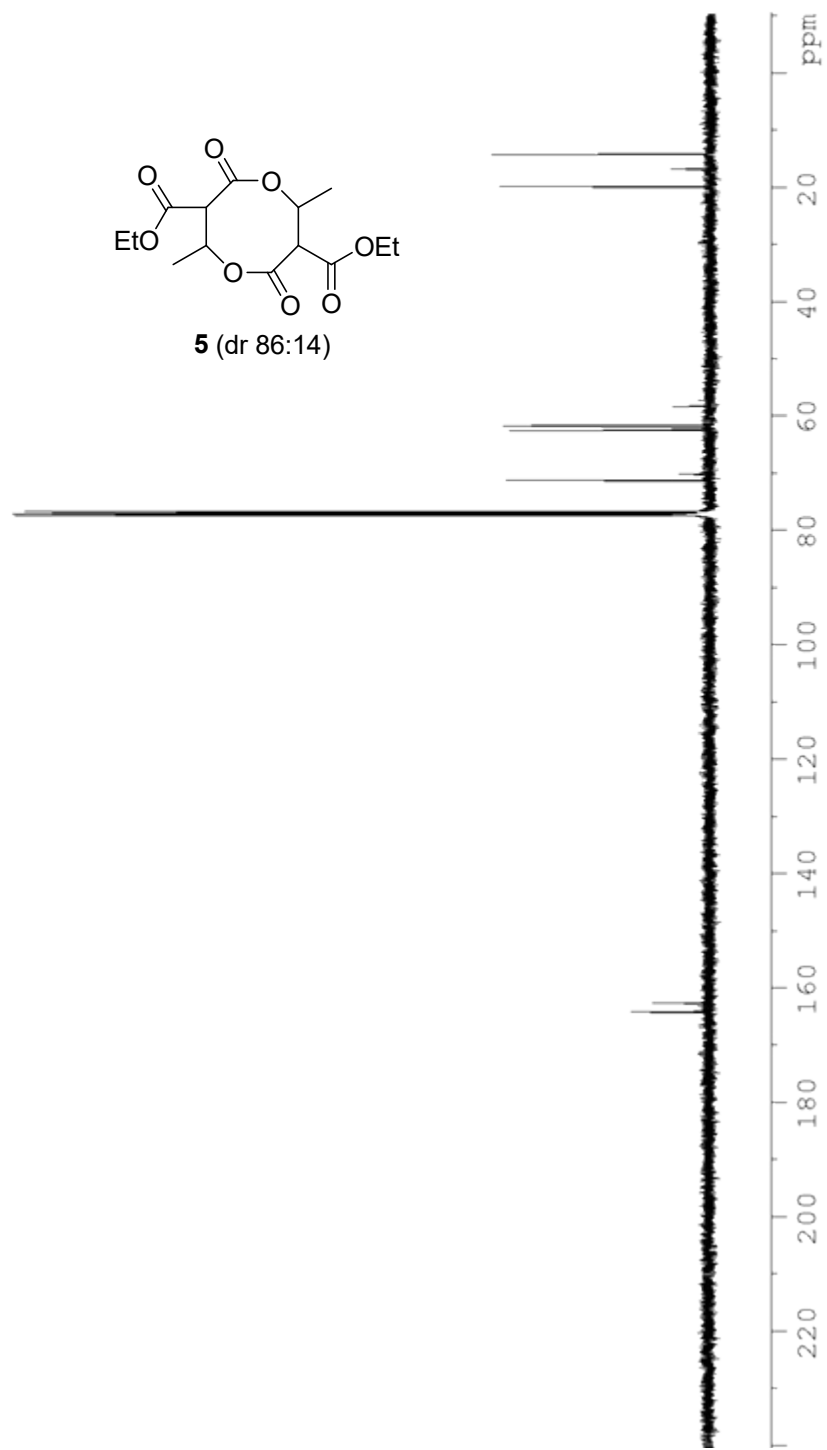

## 6) Formation and NMR Spectra of **6**

(3*R*\*,4*S*\*)-3-Benzoyl-4-methyloxetan-2-one (**6**)<sup>14</sup>

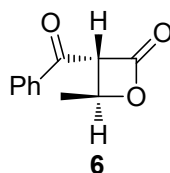

Following the procedure for the preparation of **3a/3a'**, the titled compound was obtained from the reaction of **2a** (54.7 mg, 0.289 mmol) with ethyl 2-diazo-3-oxo-3-phenylpropanoate (**1f**, 378.5 mg, 1.73 mmol) in the presence of Rh<sub>2</sub>(OAc)<sub>4</sub> (7.74 mg, 99%, 0.017 mmol). After slow addition of **1f** over 30 min and stirring for an additional 1 h, the reaction mixture was concentrated and the crude residue was subjected to chromatography (silica gel; hexane/ethyl acetate = 12:1, 10:1, 8:1) to afford **6** (165 mg) as the only identifiable product plus an unidentifiable mixture.

<sup>1</sup>H NMR (400 MHz, CDCl<sub>3</sub>) δ 8.09 (br d, *J* = 7.4 Hz, 2 H), 7.65 (t, *J* = 7.4 Hz, 1 H), 7.56-7.52 (m, 2 H), 5.37 (dq, *J* = 6.2, 4.3 Hz, 1 H), 4.97 (d, *J* = 4.3 Hz, 1 H), 1.71 (d, *J* = 6.2 Hz, 3 H) ppm; <sup>13</sup>C NMR (100 MHz, CDCl<sub>3</sub>) δ 188.2, 163.6, 134.8, 134.5, 129.3, 128.9, 70.2, 66.4, 19.6 ppm.

Current Data Parameters  
 NAME zhu-47-1  
 EXPNO 1  
 PROCNO 1

F2 - Acquisition Parameters  
 Date\_ 20230313  
 Time 12.24  
 INSTRUM spect  
 PROBHD 5 mm QNP 1H/13  
 PULPROG zg30  
 TD 32768  
 SOLVENT CDCl3  
 NS 80  
 DS 0  
 SWH 7211.539 Hz  
 FIDRES 0.220079 Hz  
 AQ 2.2719147 sec  
 RG 362  
 DW 69.333 usec  
 DE 6.50 usec  
 TE 291.1 K  
 D1 2.00000000 sec  
 TD0 1

==== CHANNEL f1 =====  
 NUC1 1H  
 P1 15.00 usec  
 PL1 0.90 dB  
 SFO1 400.1336012 MHz  
 F2 - Processing parameters  
 SI 16384  
 SF 400.1300095 MHz  
 WDW EM  
 SSB 0  
 LB 0.30 Hz  
 GB 0  
 PC 1.00

8.0944  
 8.0753  
 7.6692  
 7.6665  
 7.6507  
 7.6349  
 7.6321  
 7.5555  
 7.5358  
 7.5172  
 7.2600  
 5.4018  
 5.3864  
 5.3753  
 5.3714  
 5.3601  
 5.3448  
 4.9688  
 4.9582  
 1.7149  
 1.6994

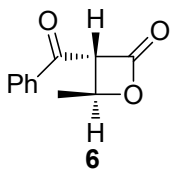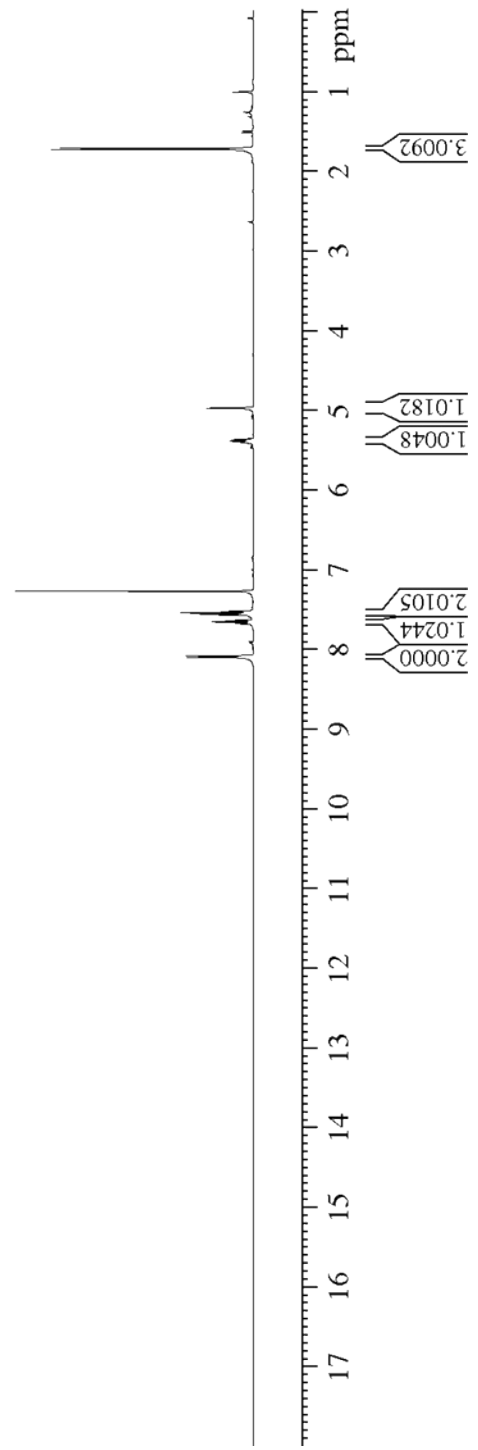

Current Data Parameters  
 NAME zhu-47-1  
 EXPNO 4  
 PROCNO 1

F2 - Acquisition Parameters  
 Date\_ 20230313  
 Time\_ 22.35  
 INSTRUM spect  
 PROBHD 5 mm QNP 1H/13  
 PULPROG zgpg30  
 TD 65536  
 SOLVENT CDCl3  
 NS 10875  
 DS 0  
 SWH 25252.525 Hz  
 FIDRES 0.385323 Hz  
 AQ 1.2976128 sec  
 RG 2050  
 DW 19.800 usec  
 DE 6.50 usec  
 TE 291.5 K  
 D1 2.00000000 sec  
 d11 0.03000000 sec  
 DELTA 1.89999998 sec  
 TD0 1

==== CHANNEL f1 =====  
 NUC1 13C  
 P1 10.00 usec  
 PL1 6.20 dB  
 SFO1 100.6243395 MHz

==== CHANNEL f2 =====  
 CPDPRG2 waltz16  
 NUC2 1H  
 PCPD2 90.00 usec  
 PL2 -0.40 dB  
 PL12 15.80 dB  
 PL13 18.50 dB  
 SFO2 400.1316005 MHz

F2 - Processing parameters  
 SI 32768  
 SF 100.6127735 MHz  
 WDW EM  
 SSB 0  
 LB 1.00 Hz  
 GB 0  
 PC 1.40

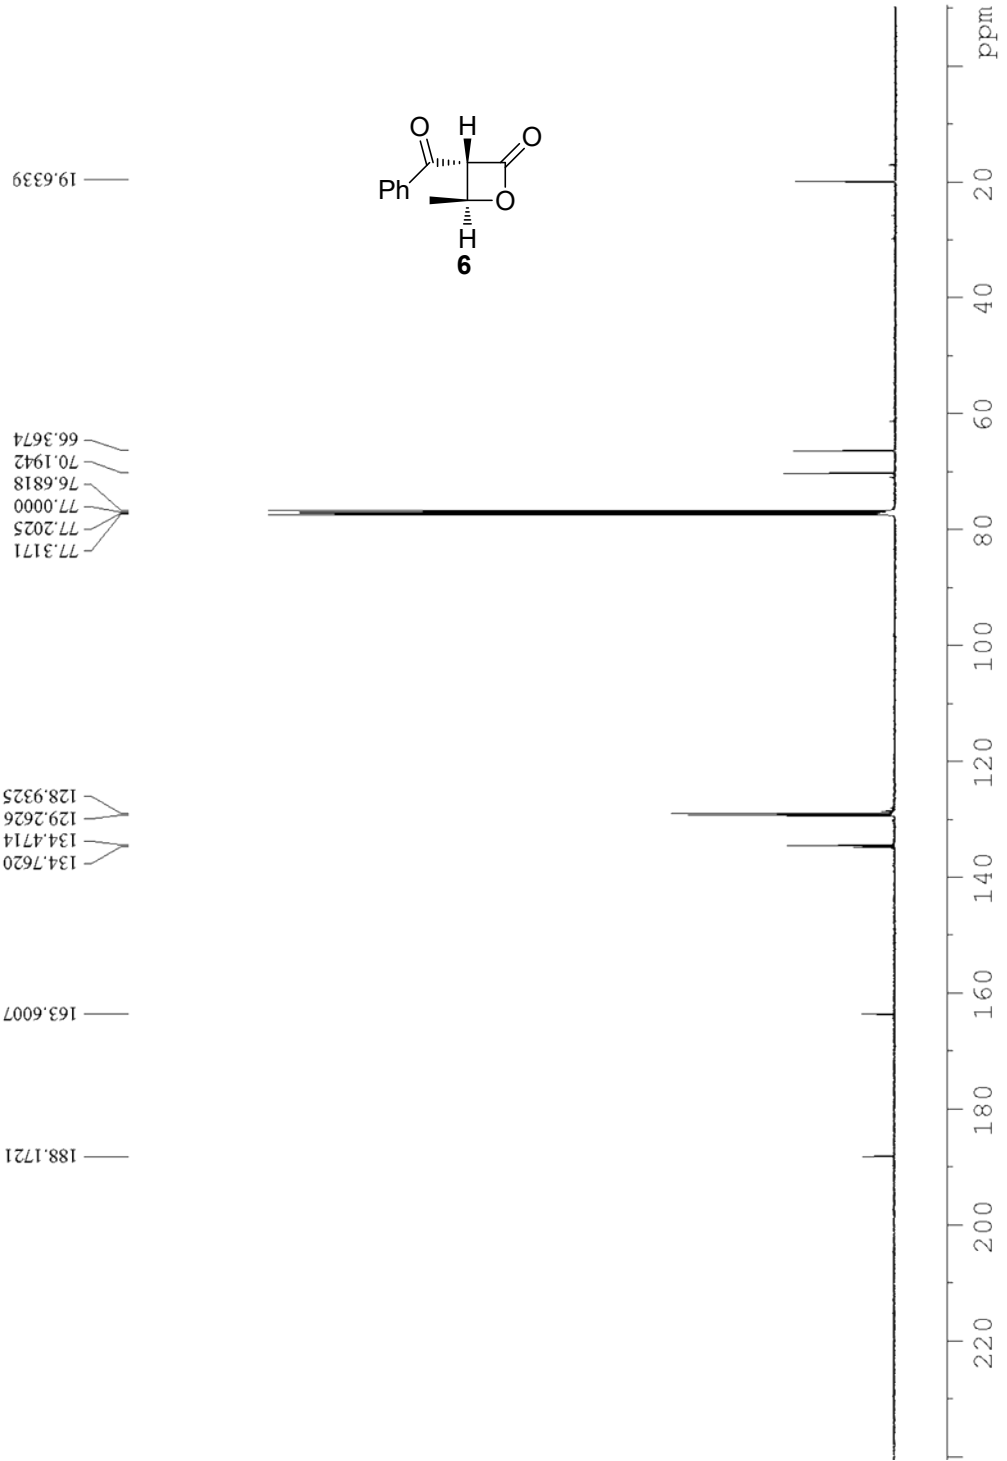



## 7) Preparation and NMR spectra of Bis(cyclopropanated) Adducts 3c-j

*Typical Procedure:* A flame-dried flask equipped with a stir bar was successively charged with 7-cyanonorcaradienyl esters **2** (0.3277 mmol), DCM (2 mL) and  $\text{Rh}_2(\text{OAc})_4$  (0.0098 mmol, 0.03 equiv). A solution of diazo compounds **1** (0.426 mmol, 1.3 equiv) in DCM (4.6 mL) was then added to the vigorously stirred mixture via a syringe over 40 min. After the addition was completed, the reaction mixture was stirred for an additional 1 h and concentrated under reduced pressure. The crude residue was purified by chromatography on triethylamine-deactivated silica gel by eluting with hexane/ethyl acetate to afford **3c-j**.

(1*R*\*,2*R*\*,3*S*\*,4*R*\*,7*R*\*,8*S*\*)-3-*tert*-Butyl 8-ethyl 3,8-dicyanotricyclo[5.1.0.0<sup>2,4</sup>]oct-5-ene-3,8-dicarboxylate (**3c**)

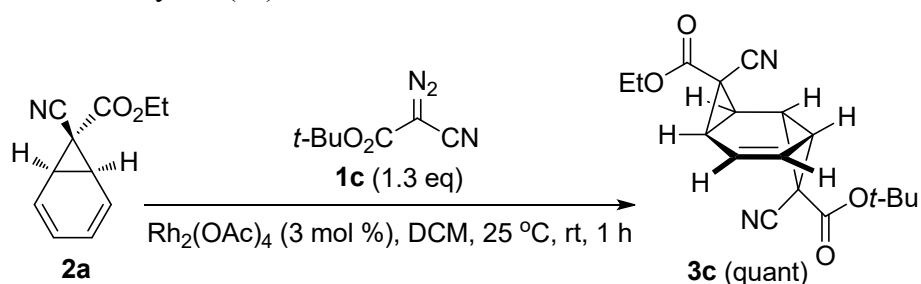

The titled compound was synthesized from **2a** and **1c** by following the typical procedure. After chromatography (triethylamine-deactivated silica gel; hexane/ethyl acetate = 12:1, 5:1), **3c** was obtained quantitatively as a white solid. The isolated product was crystallized from  $\text{CH}_2\text{Cl}_2$  to form colorless crystals that were suitable for X-ray crystallographic analysis. IR (neat): 3057, 2983, 2246, 1731, 1287, 1249, 1155, 839, 779  $\text{cm}^{-1}$ ; <sup>1</sup>H NMR (400 MHz,  $\text{CDCl}_3$ )  $\delta$  6.08 (dd,  $J = 9.2, 4.6$  Hz, 1 H, =CH), 6.05 (dd,  $J = 9.2, 4.6$  Hz, 1 H, =CH), 4.26 (q,  $J = 7.2$  Hz, 2 H,  $\text{OCH}_2\text{CH}_3$ ), 2.67 (br d,  $J = 8.9$  Hz, 1 H), 2.59 (br d,  $J = 8.9$  Hz, 1 H), 2.48 (dd,  $J = 8.9, 4.6$  Hz, 1 H), 2.41 (dd,  $J = 8.9, 4.6$  Hz, 1 H), 1.49 (s, 9 H, *t*-Bu), 1.32 (t,  $J = 7.2$  Hz, 3 H,  $\text{OCH}_2\text{CH}_3$ ) ppm; <sup>13</sup>C NMR (100 MHz,  $\text{CDCl}_3$ )  $\delta$  165.3 (C=O), 163.9 (C=O), 123.5 (=CH), 123.0 (=CH), 114.4 (CN), 114.2 (CN), 84.7 (C-O), 63.2 ( $\text{OCH}_2\text{CH}_3$ ), 29.0, 28.9, 28.3, 28.2, 27.2 (methyl of *t*-Bu), 27.4, 26.7, 14.0 ( $\text{OCH}_2\text{CH}_3$ ) ppm; HRMS-EI:  $m/z$  [ $\text{M}$ ]<sup>+</sup> calcd. for  $\text{C}_{18}\text{H}_{20}\text{N}_2\text{O}_4$ : 328.1423; found: 328.1425.

(1*R*\*,2*S*\*,3*S*\*,4*R*\*,7*R*\*,8*S*\*)-Ethyl 8-benzoyl-3,8-dicyanotricyclo[5.1.0.0<sup>2,4</sup>]oct-5-ene-3-carboxylate (**3d**)

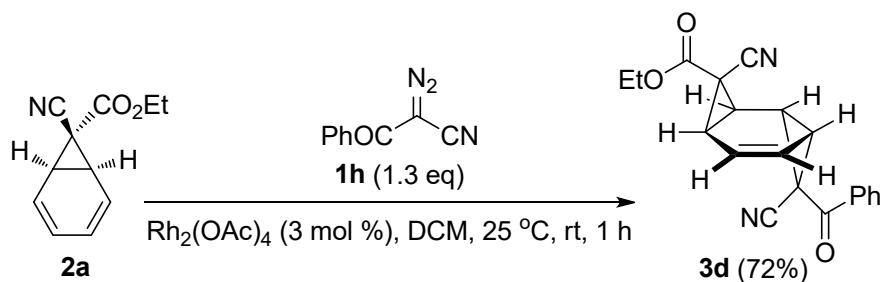

The titled compound was synthesized from **2a** and **1h** by following the typical procedure. After chromatography (triethylamine-deactivated silica gel; hexane/ethyl acetate = 10:1, 5:1), **3d** was obtained in 72% yield as a white solid. IR (neat): 3057, 2920, 2243, 1735, 1699, 245, 782, 699  $\text{cm}^{-1}$ ;  $^1\text{H}$  NMR (400 MHz,  $\text{CDCl}_3$ )  $\delta$  7.98 (d,  $J = 7.9$  Hz, 2 H, phenyl), 7.64 (t,  $J = 7.2$  Hz, 1 H, phenyl), 7.52 (t,  $J = 7.5$  Hz, 2 H, phenyl), 6.25-6.15 (m, 2 H, =CH), 4.30 (q,  $J = 7.1$  Hz, 2 H,  $\text{OCH}_2\text{CH}_3$ ), 2.99 (br d,  $J = 8.7$  Hz, 1 H), 2.75 (br d,  $J = 8.8$  Hz, 1 H), 2.62-2.57 (m, 2 H), 1.36 (t,  $J = 7.1$  Hz, 3 H,  $\text{OCH}_2\text{CH}_3$ ) ppm;  $^{13}\text{C}$  NMR (100 MHz,  $\text{CDCl}_3$ )  $\delta$  189.6 (C=O, benzoyl), 165.4 (C=O, ester), 135.2, 134.0, 128.8, 128.7, 124.0, 123.5, 116.4 (CN), 114.2 (CN), 63.4 ( $\text{OCH}_2\text{CH}_3$ ), 33.2, 31.0, 29.1, 28.4, 27.6, 27.5, 14.0 ( $\text{OCH}_2\text{CH}_3$ ) ppm; HRMS-EI:  $m/z$   $[\text{M}]^+$  calcd. for  $\text{C}_{20}\text{H}_{16}\text{N}_2\text{O}_3$ : 332.1161; found: 332.1163.

(1*R*\*,2*S*\*,3*S*\*,4*R*\*,7*R*\*,8*S*\*)-Methyl 8-benzoyl-3,8-dicyanotricyclo[5.1.0.0<sup>2,4</sup>]oct-5-ene-3-carboxylate (**3e**)

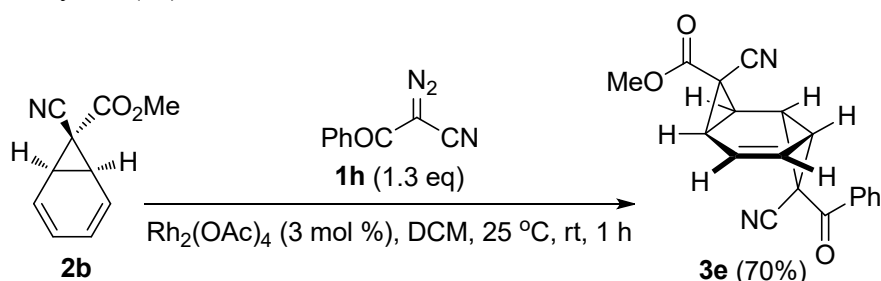

The titled compound was synthesized from **2b** and **1h** by following the typical procedure. After chromatography (triethylamine-deactivated silica gel; hexane/ethyl acetate = 10:1, 3:1), **3e** was obtained in 70% yield as a colorless oil. IR (neat): 3058, 2956, 2243, 1738, 1682, 1250, 780, 732, 698  $\text{cm}^{-1}$ ;  $^1\text{H}$  NMR (400 MHz,  $\text{CDCl}_3$ )  $\delta$  7.98 (d,  $J = 7.5$  Hz, 2 H, phenyl), 7.64 (t,  $J = 7.4$  Hz, 1 H, phenyl), 7.52 (t,  $J = 7.7$  Hz, 2 H, phenyl), 6.22-6.16 (m, 2 H, =CH), 3.86 (s, 3 H,  $\text{OCH}_3$ ), 2.98 (br d,  $J = 8.8$  Hz, 1 H), 2.76 (br d,  $J = 8.9$  Hz, 1 H), 2.62-2.57 (m, 2 H) ppm;  $^{13}\text{C}$  NMR (100 MHz,  $\text{CDCl}_3$ )  $\delta$  189.6 (C=O, benzoyl), 165.9 (C=O, ester), 135.2, 134.0, 128.7, 128.6, 123.8, 123.6, 116.3 (CN), 114.2 (CN), 53.9 ( $\text{OCH}_3$ ), 33.1, 30.9, 29.3, 28.2, 27.8, 27.5 ppm; HRMS-EI:  $m/z$   $[\text{M}]^+$  calcd. for  $\text{C}_{19}\text{H}_{14}\text{N}_2\text{O}_3$ : 318.1004; found: 318.1010.

(1*R*\*,2*S*\*,3*S*\*,4*R*\*,7*R*\*,8*S*\*)-tert-Butyl 8-benzoyl-3,8-dicyanotricyclo[5.1.0.0<sup>2,4</sup>]oct-5-ene-3-carboxylate (**3f**)

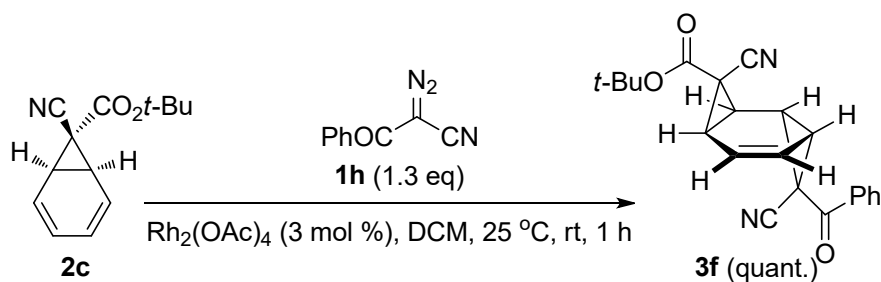

The titled compound was synthesized from **2c** and **1h** by following the typical

procedure. After chromatography (triethylamine-deactivated silica gel; hexane/ethyl acetate = 12:1, 8:1), **3f** was obtained in quantitative yield as a yellow solid. The isolated product was crystallized from CH<sub>2</sub>Cl<sub>2</sub>-MeOH to form colorless crystals that were suitable for X-ray crystallographic analysis. <sup>1</sup>H NMR (400 MHz, CDCl<sub>3</sub>) δ 7.98 (d, *J* = 7.3 Hz, 2 H, phenyl), 7.63 (t, *J* = 7.4 Hz, 1 H, phenyl), 7.51 (t, *J* = 7.6 Hz, 2 H, phenyl), 6.21-6.14 (m, 2 H, =CH), 2.97 (br d, *J* = 8.8 Hz, 1 H), 2.67 (br d, *J* = 8.8 Hz, 1 H), 2.60 (dd, *J* = 8.8, 4.4 Hz, 1 H), 2.49 (dd, *J* = 8.8, 4.3 Hz, 1 H), 1.52 (s, 9 H, *t*-Bu) ppm; <sup>13</sup>C NMR (100 MHz, CDCl<sub>3</sub>) δ 189.7 (C=O, benzoyl), 164.0 (C=O, ester), 135.2, 133.9, 128.7, 128.6, 124.2, 123.2, 116.4 (CN), 114.5 (CN), 84.8 (C-O), 33.2, 31.0, 29.1, 28.5, 27.8 (methyl of *t*-Bu), 27.1 ppm; HRMS-EI: *m/z* [M]<sup>+</sup> calcd. for C<sub>22</sub>H<sub>20</sub>N<sub>2</sub>O<sub>3</sub>: 360.1474; found: 360.1472.

(1*S*\*,2*S*\*,3*S*\*,4*R*\*,7*S*\*,8*R*\*)-*tert*-Butyl 8-benzoyl-3,8-dicyano-6-methyltricyclo-[5.1.0.0<sup>2,4</sup>]-oct-5-ene-3-carboxylate (**3g**)

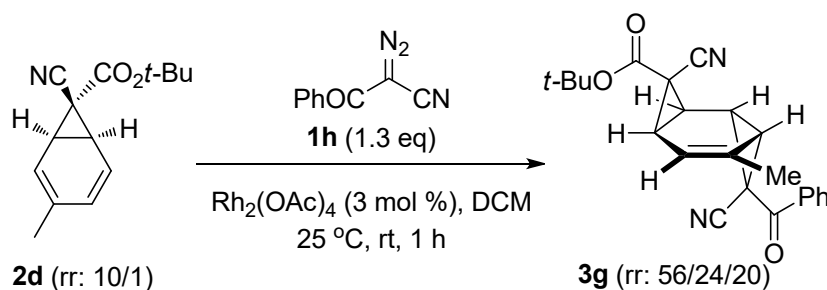

The titled compound was synthesized from **2d** (rr: 10/1) and **1h** by following the typical procedure. After chromatography (triethylamine-deactivated silica gel; hexane/ethyl acetate = 15:1, 10:1, 8:1), **3g** was obtained in 80% yield as an inseparable mixture of three regioisomers (rr: 56/24/20). <sup>1</sup>H NMR (400 MHz, CDCl<sub>3</sub>) major isomer (56%): δ 7.99 (d, *J* = 7.4 Hz, 2 H, Ph), 7.64 (t, *J* = 7.4 Hz, 1 H, Ph), 7.52 (t, *J* = 7.8 Hz, 2 H, Ph), 5.90-5.85 (m, 1 H, =CH), 2.99 (br d, *J* = 8.8 Hz, 1 H), 2.63 (br d, *J* = 8.9 Hz, 1 H), 2.49-2.43 (m, 1 H), 2.45 (d, *J* = 8.9 Hz, 1 H), 2.01 (s, 3 H, Me), 1.51 (s, 9 H, *t*-Bu) ppm; minor isomer-1 (24%): δ 7.96 (d, *J* = 7.2 Hz, 2 H, Ph), 7.68-7.60 (m, 1 H, Ph), 7.56-7.50 (m, 2 H, Ph), 5.90-5.85 (m, 1 H, =CH), 3.02-2.96 (m, 1 H), 2.73-2.49 (m, 3 H), 2.01 (s, 3 H, Me), 1.52 (s, 9 H, *t*-Bu) ppm; minor isomer-2 (20%): δ 7.89 (d, *J* = 7.4 Hz, 2 H, Ph), 7.66-7.61 (m, 1 H, Ph), 7.52-7.48 (m, 2 H, Ph), 6.21 (dd, *J* = 9.8, 5.2 Hz, 1 H, =CH), 6.08 (d, *J* = 9.8 Hz, 1 H, =CH), 2.94 (br s, 1 H), 2.73-2.49 (m, 1 H), 2.35 (d, *J* = 8.9 Hz, 1 H), 2.01 (s, 3 H, Me), 1.53 (s, 9 H, *t*-Bu) ppm; <sup>13</sup>C NMR (100 MHz, CDCl<sub>3</sub>) δ 190.1 (C=O, benzoyl, minor), 189.9 (C=O, benzoyl, major), 188.7 (C=O benzoyl, minor), 164.3 (x 2, C=O, ester), 164.1 (C=O, ester), 135.4, 135.3 (x 2), 134.3, 134.0 (x 2), 133.8, 133.5, 132.2, 129.0, 128.9, 128.7 (x 2), 128.6, 128.5, 123.7, 117.4 (x 2), 116.9 (CN, minor), 116.7 (CN, minor), 116.5 (CN, major), 116.3 (CN, major), 114.9 (CN, minor), 114.8 (CN, minor), 84.9 (C-O,

minor), 84.7 (C-O, minor), 84.6 (C-O, major), 37.1, 36.5, 35.2 (x 2), 32.9, 32.6, 32.6, 32.4 (x 2), 29.7, 29.5, 29.2, 28.7, 28.5, 28.2, 28.1, 27.9, 27.8 (x 2, methyl of *t*-Bu), 27.1, 26.5, 22.7, 22.6, 17.8 ppm; HRMS-EI:  $m/z$   $[M]^+$  calcd. for  $C_{23}H_{22}N_2O_3$ : 374.1630; found: 374.1627.

(1*R*\*,2*S*\*,3*S*\*,4*R*\*,7*R*\*,8*S*\*)-Ethyl 8-acetyl-3,8-dicyanotricyclo[5.1.0.0<sup>2,4</sup>]oct-5-ene-3-carboxylate (**3h**)

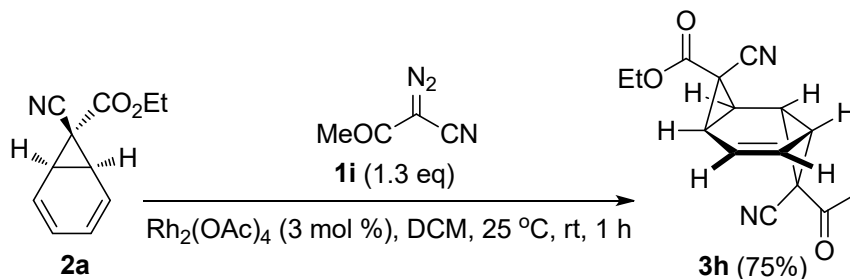

The titled compound was synthesized from **2a** and **1i** by following the typical procedure. After chromatography (triethylamine-deactivated silica gel; hexane/ethyl acetate = 12:1, 8:1, 4:1), **3h** was obtained in 75% yield as a colorless oil. The isolated product was crystallized from ethyl acetate to form colorless crystals that were suitable for X-ray crystallographic analysis. IR (neat): 3056, 2986, 2244, 1732, 1712, 1248, 855, 790  $cm^{-1}$ ;  $^1H$  NMR (400 MHz,  $CDCl_3$ )  $\delta$  6.11 (dd,  $J$  = 9.5, 4.6 Hz, 1 H, =CH), 6.07 (dd,  $J$  = 9.5, 4.4 Hz, 1 H, =CH), 4.27 (q,  $J$  = 7.1 Hz, 2 H,  $OCH_2CH_3$ ), 2.69 (br d,  $J$  = 8.8 Hz, 1 H), 2.65 (br d,  $J$  = 8.7 Hz, 1 H), 2.57 (s, 3 H,  $CH_3CO$ ), 2.50 (dd,  $J$  = 8.8, 4.6 Hz, 1 H), 2.46 (dd,  $J$  = 8.7, 4.4 Hz, 1 H), 1.34 (t,  $J$  = 7.1 Hz, 3 H,  $OCH_2CH_3$ ) ppm;  $^{13}C$  NMR (100 MHz,  $CDCl_3$ )  $\delta$  196.3 (C=O, acetyl), 165.4 (C=O, ester), 123.6 (=CH), 123.5 (=CH), 116.2 (CN), 114.0 (CN), 63.4 ( $OCH_2CH_3$ ), 35.0, 31.7, 29.6, 29.3, 28.9, 28.1, 27.7, 14.0 ( $OCH_2CH_3$ ) ppm; HRMS-EI:  $m/z$   $[M]^+$  calcd. for  $C_{15}H_{14}N_2O_3$ : 270.1004; found: 270.0998.

(1*R*\*,2*S*\*,3*S*\*,4*R*\*,7*R*\*,8*S*\*)-Methyl 8-acetyl-3,8-dicyanotricyclo[5.1.0.0<sup>2,4</sup>]oct-5-ene-3-carboxylate (**3i**)

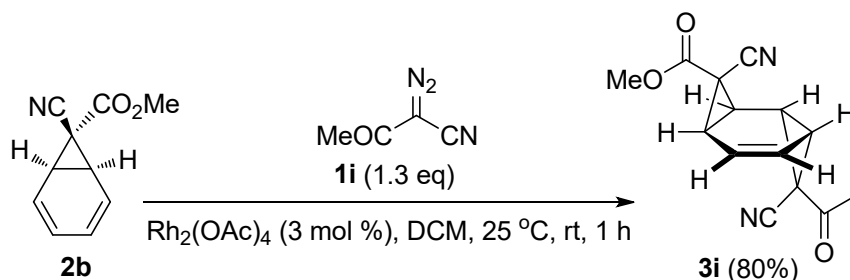

The titled compound was synthesized from **2b** and **1i** by following the typical procedure. After chromatography (triethylamine-deactivated silica gel; hexane/ethyl acetate = 8:1, 5:1, 2:1), **3h** was obtained in 80% yield as a white solid. IR (neat): 3056, 2958, 2244, 1738, 1711, 1253, 862, 729  $cm^{-1}$ ;  $^1H$  NMR (400 MHz,  $CDCl_3$ )  $\delta$  6.12-6.06 (m, 2 H, =CH), 3.84 (s, 3 H,  $OCH_3$ ), 2.69 (br d,  $J$  = 8.8 Hz, 1 H), 2.67 (br d,  $J$  =

8.7 Hz, 1 H), 2.58 (s, 3 H, CH<sub>3</sub>CO), 2.52 (dd, *J* = 8.8, 4.4 Hz, 1 H), 2.46 (dd, *J* = 8.7, 4.4 Hz, 1 H) ppm; <sup>13</sup>C NMR (100 MHz, CDCl<sub>3</sub>) δ 196.3 (C=O, acetyl), 165.9 (C=O, ester), 123.7 (=CH), 123.4 (=CH), 116.1 (CN), 114.0 (CN), 53.9 (OCH<sub>3</sub>), 34.9, 31.7, 29.6, 29.2, 29.1, 27.9, 27.2 ppm; HRMS-EI: *m/z* [M]<sup>+</sup> calcd. for C<sub>14</sub>H<sub>12</sub>N<sub>2</sub>O<sub>3</sub>: 256.0848; found: 256.0839.

(1*R*,\*2*S*,\*3*S*,\*4*R*,\*7*R*,\*8*S*\*)-*tert*-Butyl 8-acetyl-3,8-dicyanotricyclo[5.1.0.0<sup>2,4</sup>]oct-5-ene-3-carboxylate (**3j**)

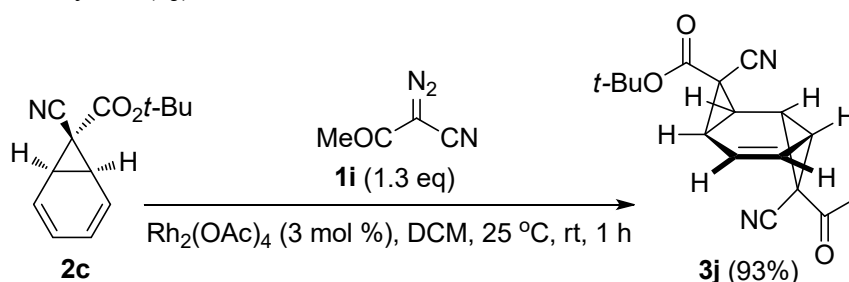

The titled compound was synthesized from **2c** and **1i** by following the typical procedure. After chromatography (triethylamine-deactivated silica gel; hexane/ethyl acetate = 8:1, 5:1, 3:1), **3j** was obtained in 93% yield as a white solid. IR (neat): 3057, 2982, 2240, 1726, 1712, 1224, 839, 736 cm<sup>-1</sup>; <sup>1</sup>H NMR (400 MHz, CDCl<sub>3</sub>) δ 6.09 (dd, *J* = 9.8, 4.8 Hz, 1 H, =CH), 6.04 (dd, *J* = 9.8, 4.7 Hz, 1 H, =CH), 2.69 (br d, *J* = 8.8 Hz, 1 H), 2.56 (br d, *J* = 8.2 Hz, 1 H), 2.55 (s, 3 H, CH<sub>3</sub>CO), 2.45 (dd, *J* = 8.8, 4.7 Hz, 1 H), 2.42 (dd, *J* = 8.2, 4.8 Hz, 1 H), 1.49 (s, 9 H, *t*-Bu) ppm; <sup>13</sup>C NMR (100 MHz, CDCl<sub>3</sub>) δ 196.3 (C=O, acetyl), 164.0 (C=O, ester), 123.7 (=CH), 123.3 (=CH), 116.2 (CN), 114.3 (CN), 84.7 (C-O), 35.0, 31.8, 29.5, 29.4, 28.8, 28.3, 27.7 (methyl of *t*-Bu), 27.0 ppm; HRMS-EI: *m/z* [M]<sup>+</sup> calcd. for C<sub>17</sub>H<sub>18</sub>N<sub>2</sub>O<sub>3</sub>: 298.1317; found: 298.1323.

Current Data Parameters  
 NAME zhu-75  
 EXPNO 3  
 PROCNO 1

F2 - Acquisition Parameters  
 Date\_ 20230707  
 Time 14.20  
 INSTRUM spect  
 PROBHD 5 mm QNP 1H/13  
 PULPROG zg30  
 TD 32768  
 SOLVENT CDCl3  
 NS 16  
 DS 0  
 SWH 7211.539 Hz  
 FIDRES 0.220079 Hz  
 AQ 2.2719147 sec  
 RG 101  
 DW 69.333 usec  
 DE 6.50 usec  
 TE 293.7 K  
 D1 2.0000000 sec  
 TD0 1

==== CHANNEL f1 =====  
 NUC1 1H  
 P1 15.00 usec  
 PL1 0.90 dB  
 SFO1 400.1336012 MHz

F2 - Processing parameters  
 SI 16384  
 SF 400.1300091 MHz  
 WDW EM  
 SSB 0  
 LB 0.30 Hz  
 GB 0  
 PC 1.00

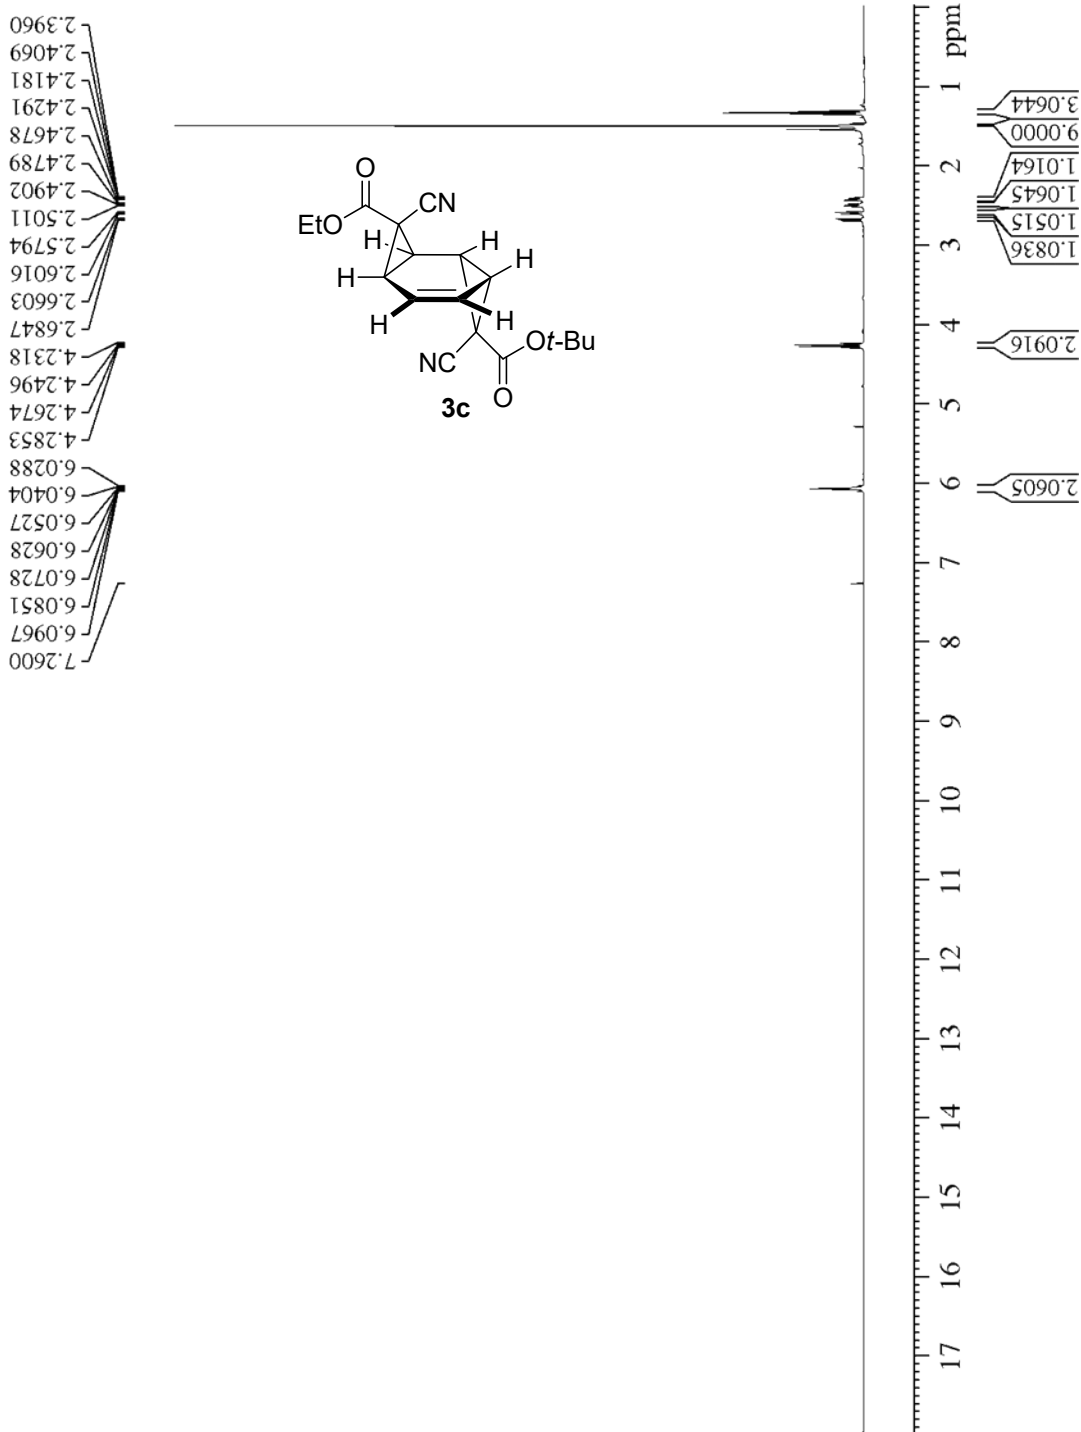

Current Data Parameters  
 NAME zhu-75  
 EXPNO 4  
 PROCNO 1

F2 - Acquisition Parameters  
 Date\_ 20230707  
 Time 14.30  
 INSTRUM spect  
 PROBHD 5 mm QNP 1H/13  
 PULPROG zgpg30  
 TD 65536  
 SOLVENT CDCl3  
 NS 400  
 DS 0  
 SWH 25252.525 Hz  
 FIDRES 0.385323 Hz  
 AQ 1.2976128 sec  
 RG 2050  
 DW 19.800 usec  
 DE 6.50 usec  
 TE 294.1 K  
 D1 2.00000000 sec  
 d11 0.03000000 sec  
 DELTA 1.89999998 sec  
 TD0 1

==== CHANNEL f1 =====  
 NUC1 13C  
 P1 10.00 usec  
 PL1 6.20 dB  
 SFO1 100.6243395 MHz

==== CHANNEL f2 =====  
 CPDPRG2 waltz16  
 NUC2 1H  
 PCPD2 90.00 usec  
 PL2 -0.40 dB  
 PL12 15.80 dB  
 PL13 18.50 dB  
 SFO2 400.1316005 MHz

F2 - Processing parameters  
 SI 32768  
 SF 100.6127813 MHz  
 WDW EM  
 SSB 0  
 LB 1.00 Hz  
 GB 0  
 PC 1.40

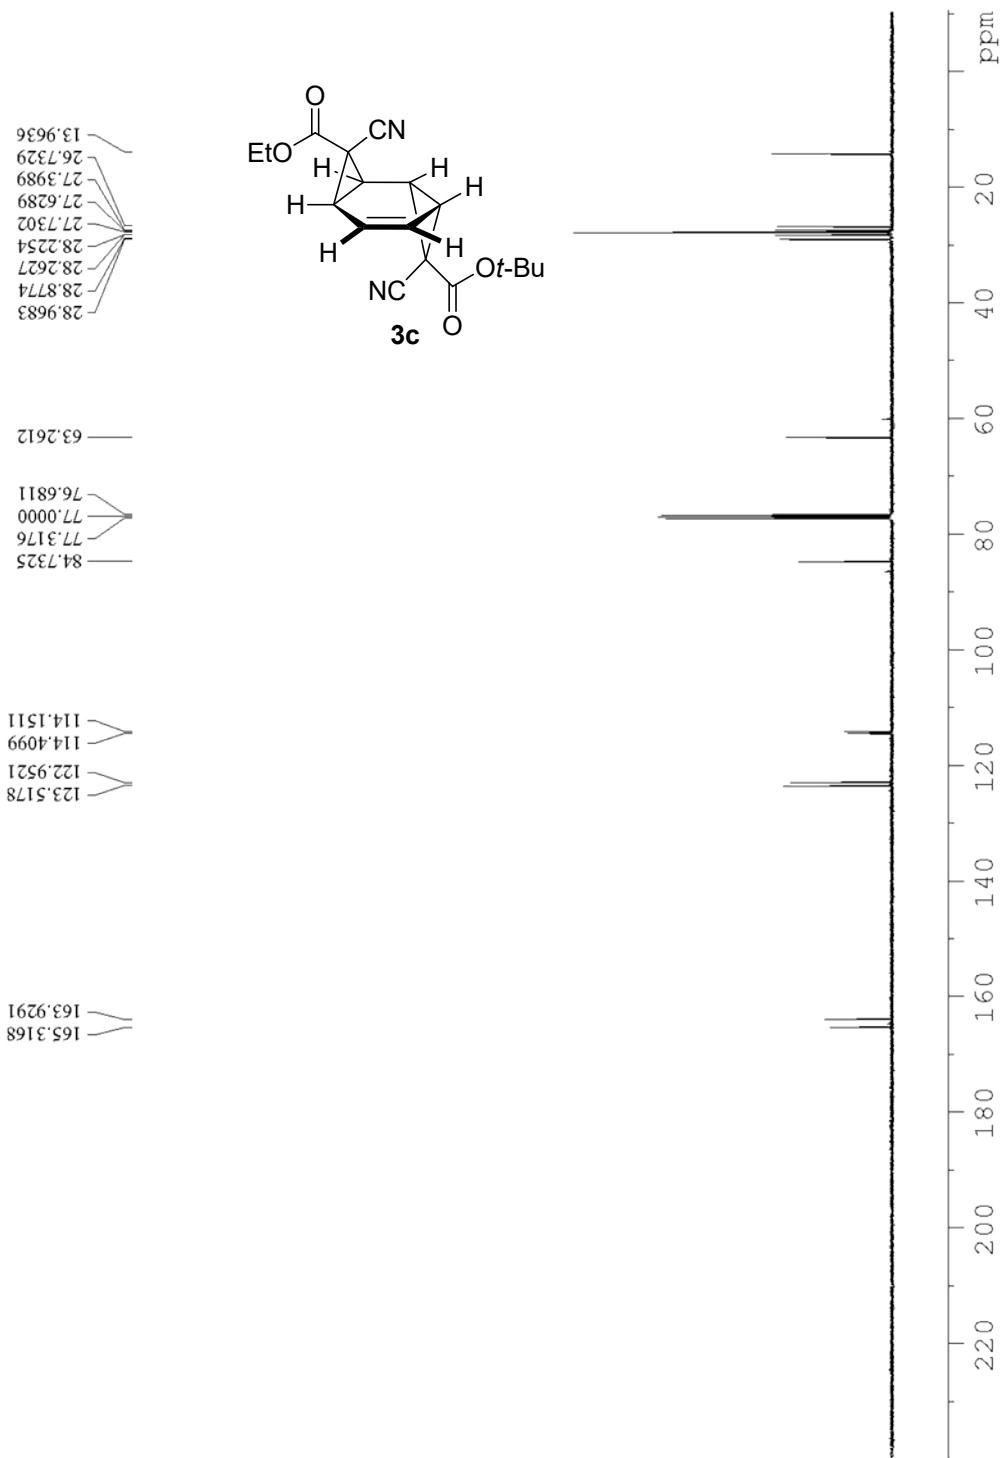

Current Data Parameters  
 NAME zhu-65  
 EXPNO 3  
 PROCNO 1

F2 - Acquisition Parameters  
 Date\_ 20230724  
 Time 12.29  
 INSTRUM spect  
 PROBHD 5 mm QNP 1H/13  
 PULPROG zg30  
 TD 32768  
 SOLVENT CDCl3  
 NS 32  
 DS 0  
 SWH 7211.539 Hz  
 FIDRES 0.220079 Hz  
 AQ 2.2719147 sec  
 RG 256  
 DW 69.333 usec  
 DE 6.50 usec  
 TE 294.0 K  
 D1 2.00000000 sec  
 TD0 1

===== CHANNEL f1 =====  
 NUC1 1H  
 P1 15.00 usec  
 PL1 0.90 dB  
 SFO1 400.1336012 MHz  
 F2 - Processing parameters  
 SI 16384  
 SF 400.1300090 MHz  
 WDW EM  
 SSB 0  
 LB 0.30 Hz  
 GB 0  
 PC 1.00

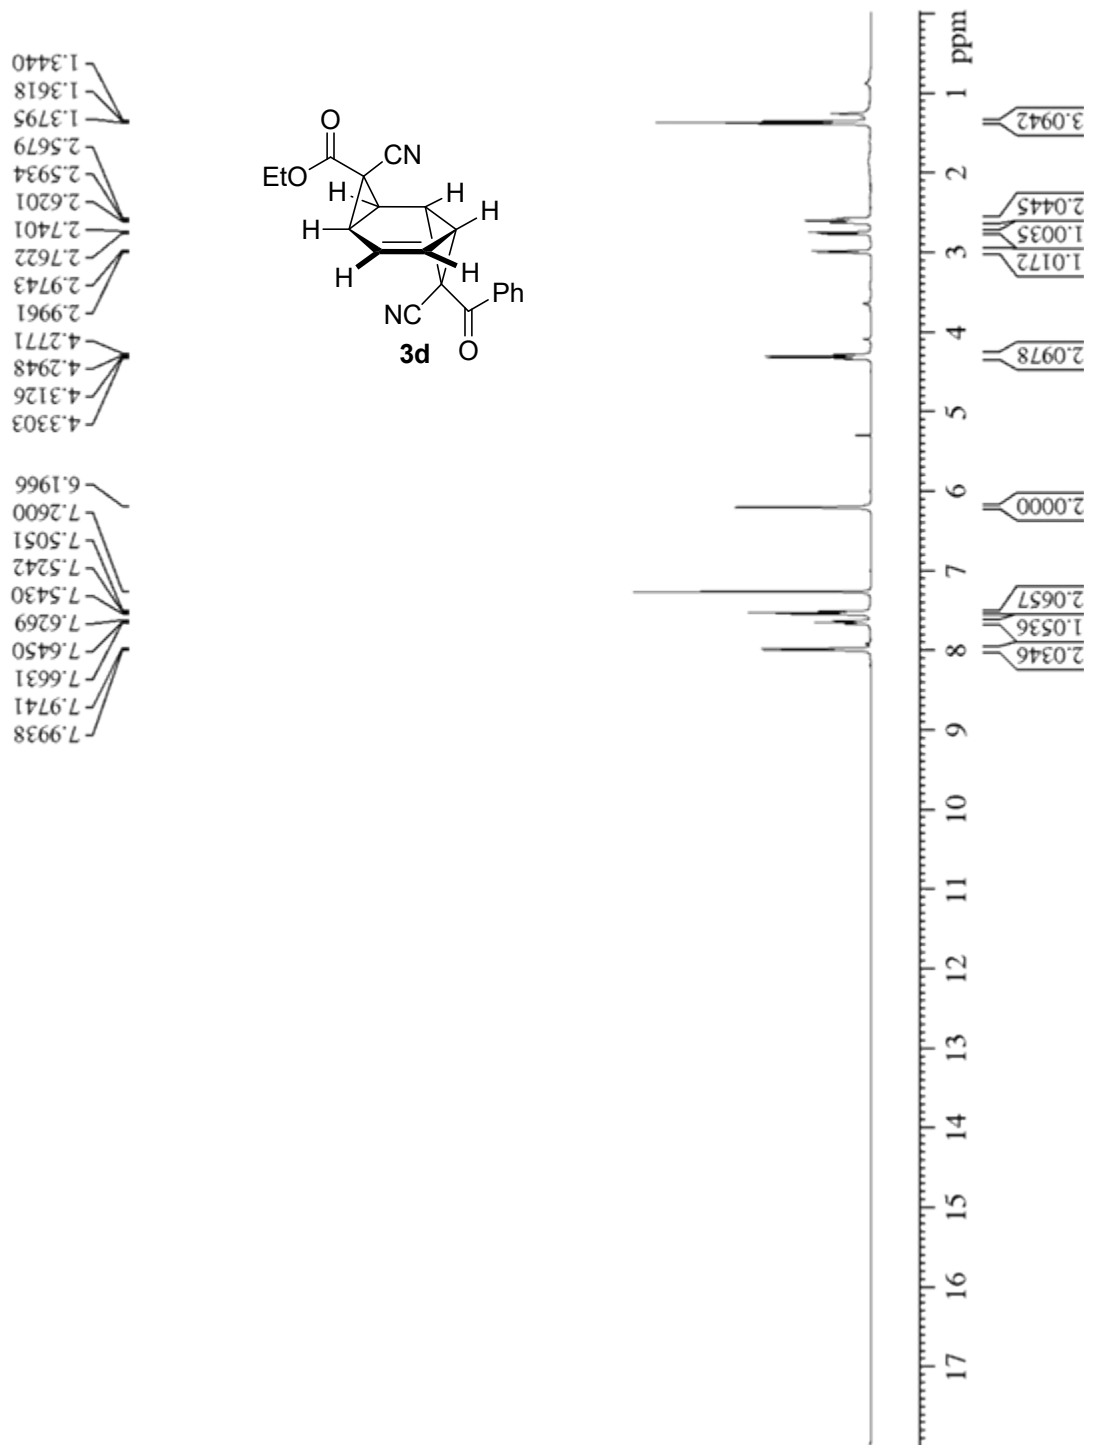



Current Data Parameters  
 NAME zhu-64-2  
 EXPNO 4  
 PROCNO 1

F2 - Acquisition Parameters  
 Date\_ 20230608  
 Time\_ 12.36  
 INSTRUM spect  
 PROBHD 5 mm QNP 1H/13  
 PULPROG zgpg30  
 TD 65536  
 SOLVENT CDCl3  
 NS 420  
 DS 0  
 SWH 25252.525 Hz  
 FIDRES 0.385323 Hz  
 AQ 1.2976128 sec  
 RG 812  
 DW 19.800 usec  
 DE 6.50 usec  
 TE 294.0 K  
 D1 2.00000000 sec  
 d11 0.03000000 sec  
 DELTA 1.89999998 sec  
 TD0 1

===== CHANNEL f1 =====  
 NUC1 13C  
 P1 10.00 usec  
 PL1 6.20 dB  
 SFO1 100.6243395 MHz

===== CHANNEL f2 =====  
 CPDPRG2 waltz16  
 NUC2 1H  
 PCPD2 90.00 usec  
 PL2 -0.40 dB  
 PL12 15.80 dB  
 PL13 18.50 dB  
 SFO2 400.1316005 MHz

F2 - Processing parameters  
 SI 32768  
 SF 100.6127772 MHz  
 WDW EM  
 SSB 0  
 LB 1.00 Hz  
 GB 0  
 PC 1.40

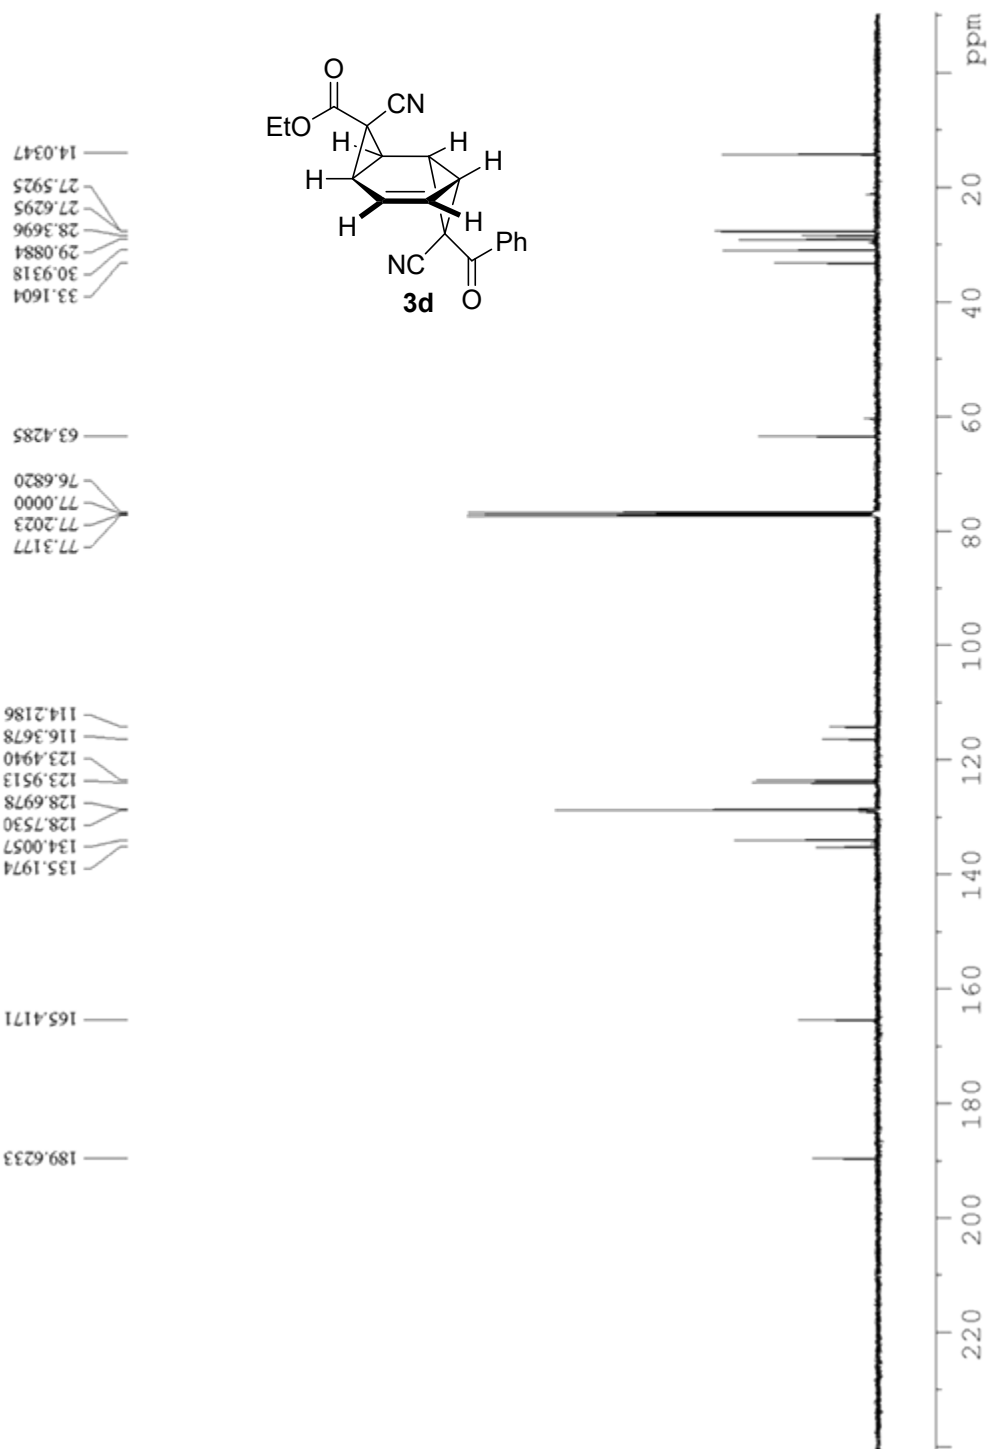

Current Data Parameters  
 NAME zhu-92  
 EXPNO 3  
 PROCNO 1

F2 - Acquisition Parameters  
 Date\_ 20231031  
 Time 12.13  
 INSTRUM spect  
 PROBHD 5 mm QNP 1H/13  
 PULPROG zg30  
 TD 32768  
 SOLVENT CDCl3  
 NS 80  
 DS 0  
 SWH 7211.539 Hz  
 FIDRES 0.220079 Hz  
 AQ 2.2719147 sec  
 RG 228  
 DW 69.333 usec  
 DE 6.50 usec  
 TE 293.0 K  
 D1 2.00000000 sec  
 TD0 1

==== CHANNEL f1 =====  
 NUC1 1H  
 P1 15.00 usec  
 PL1 0.90 dB  
 SFO1 400.1336012 MHz

F2 - Processing parameters  
 SI 16384  
 SF 400.1300092 MHz  
 WDW EM  
 SSB 0  
 LB 0.30 Hz  
 GB 0  
 PC 1.00

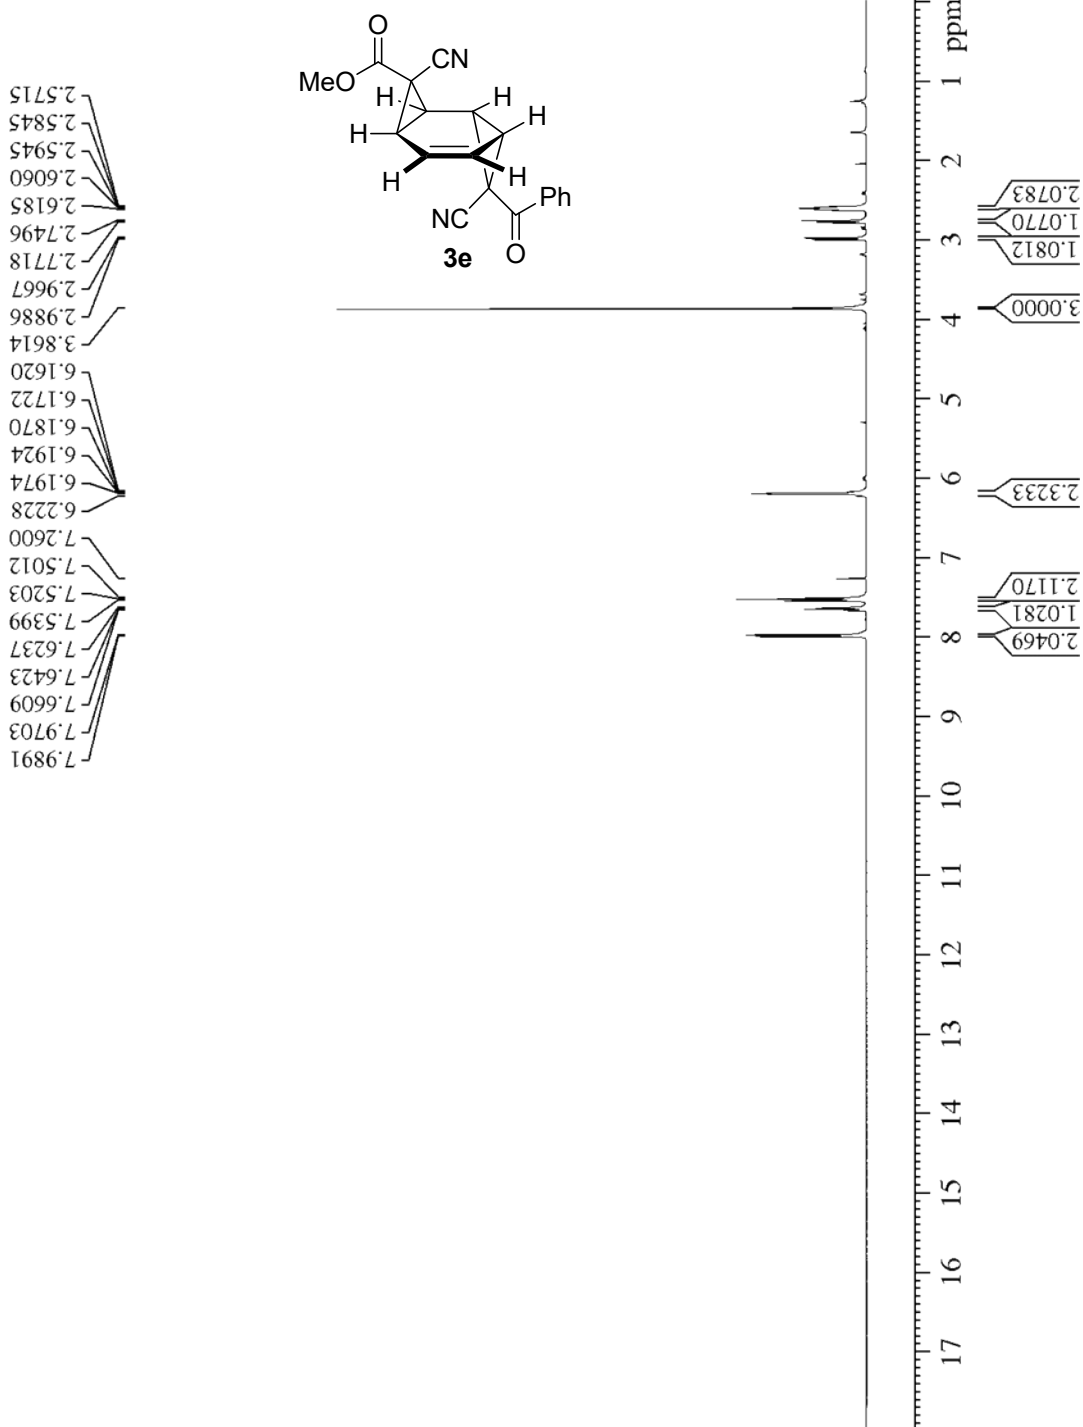

Current Data Parameters  
 NAME zhu-92  
 EXPNO 4  
 PROCNO 1

F2 - Acquisition Parameters  
 Date\_ 20231031  
 Time 12.20  
 INSTRUM spect  
 PROBHHD 5 mm QNP 1H/13  
 PULPROG zgpg30  
 TD 65536  
 SOLVENT CDCl3  
 NS 695  
 DS 0  
 SWH 25252.525 Hz  
 FIDRES 0.385323 Hz  
 AQ 1.2976128 sec  
 RG 2050  
 DW 19.800 usec  
 DE 6.50 usec  
 TE 293.1 K  
 D1 2.00000000 sec  
 d11 0.03000000 sec  
 DELTA 1.89999998 sec  
 TD0 1

==== CHANNEL f1 =====  
 NUC1 13C  
 P1 10.00 usec  
 PL1 6.20 dB  
 SFO1 100.6243395 MHz

==== CHANNEL f2 =====  
 CPDPRG2 waltz16  
 NUC2 1H  
 PCPD2 90.00 usec  
 PL2 -0.40 dB  
 PL12 15.80 dB  
 PL13 18.50 dB  
 SFO2 400.1316005 MHz

F2 - Processing parameters  
 SI 32768  
 SF 100.6127782 MHz  
 WDW EM  
 SSB 0  
 LB 1.00 Hz  
 GB 0  
 PC 1.40

27.4958  
 27.7913  
 28.1875  
 29.2672  
 30.8982  
 33.1221

53.925C

76.6814  
 77.0000  
 77.3173

114.1572  
 116.3323  
 123.5852  
 123.8335  
 128.6949  
 128.7489  
 134.0125  
 135.1691

165.9450

189.5820

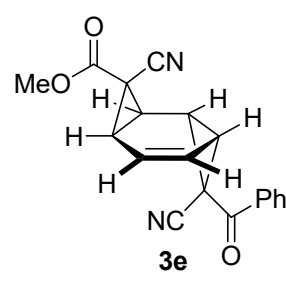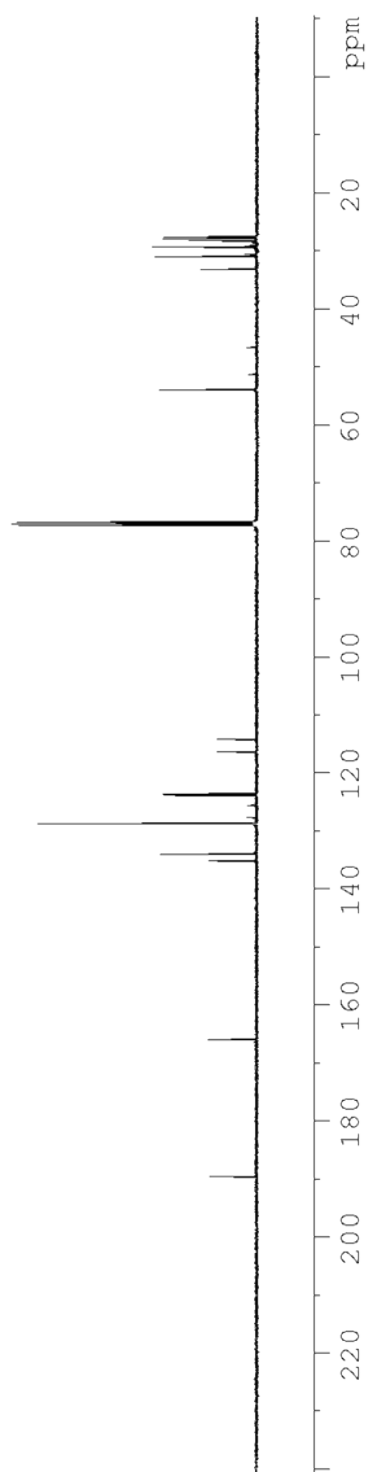

Current Data Parameters  
 NAME zhu-94  
 EXPNO 1  
 PROCNO 1

F2 - Acquisition Parameters  
 Date\_ 20231123  
 Time 16.12  
 INSTRUM spect  
 PROBHD 5 mm QNP 1H/13  
 PULPROG zg30  
 TD 32768  
 SOLVENT CDCl3  
 NS 40  
 DS 0  
 SWH 7211.539 Hz  
 FIDRES 0.220079 Hz  
 AQ 2.2719147 sec  
 RG 101  
 DW 69.333 usec  
 DE 6.50 usec  
 TE 293.1 K  
 D1 2.0000000 sec  
 TD0 1

==== CHANNEL f1 =====  
 NUC1 1H  
 P1 15.00 usec  
 PL1 0.90 dB  
 SFO1 400.1336012 MHz

F2 - Processing parameters  
 SI 16384  
 SF 400.1300091 MHz  
 WDW EM  
 SSB 0  
 LB 0.30 Hz  
 GB 0  
 PC 1.00

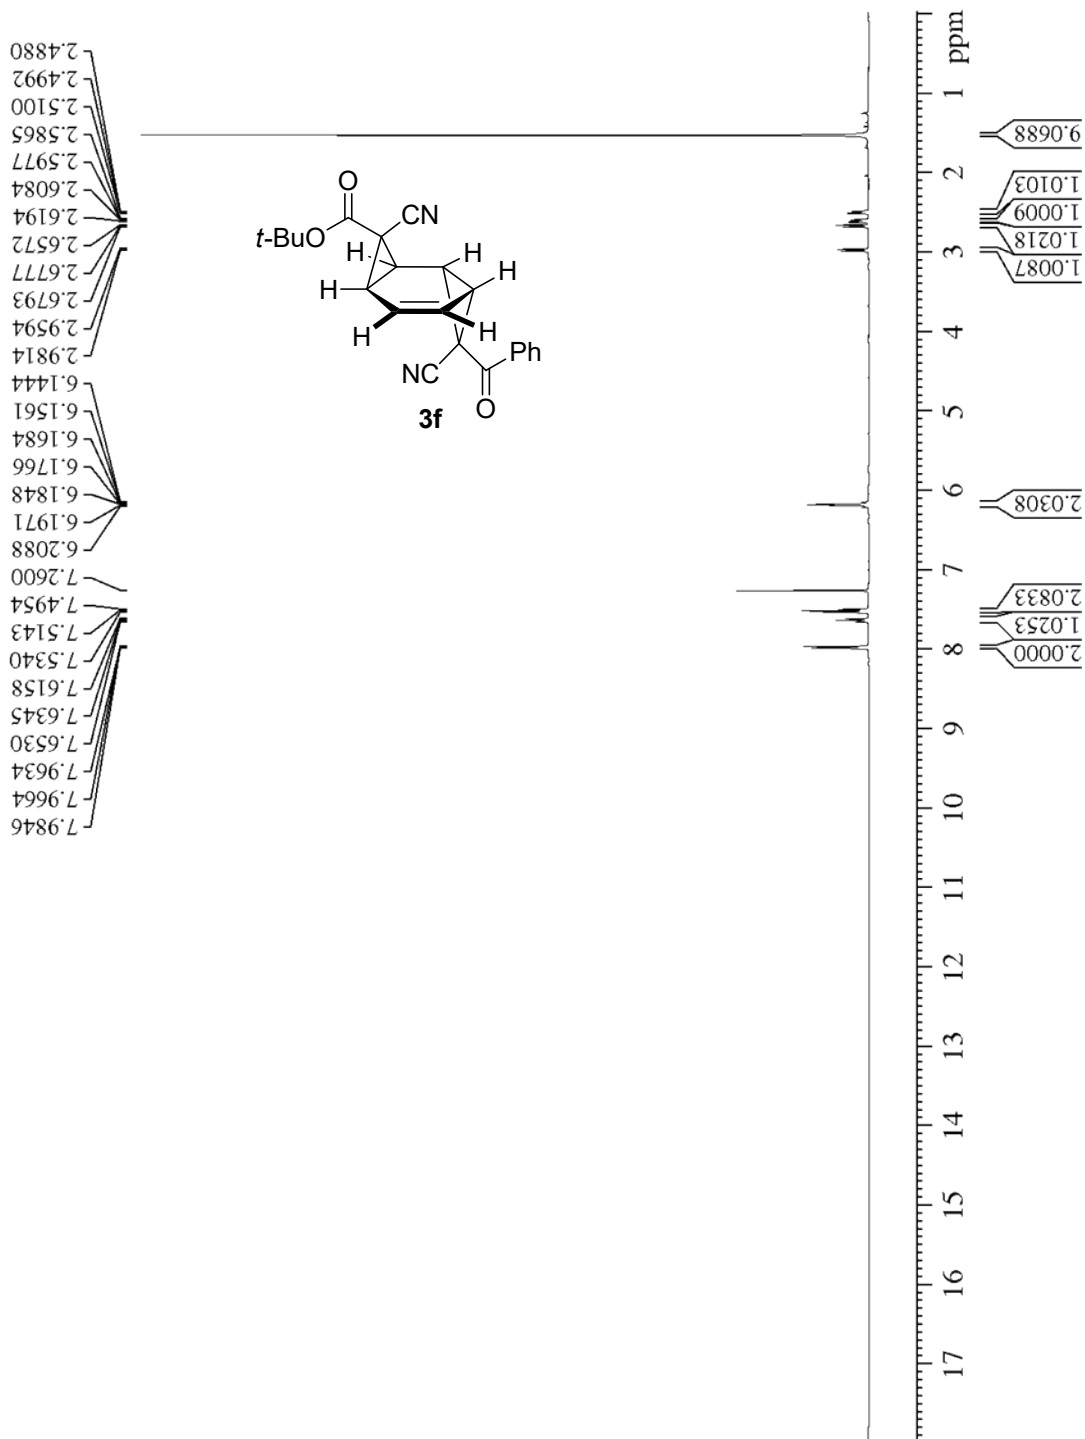

Current Data Parameters  
 NAME zhu-94  
 EXPNO 2  
 PROCNO 1

F2 - Acquisition Parameters  
 Date\_ 20231123  
 Time 16.17  
 INSTRUM spect  
 PROBHD 5 mm QNP 1H/13  
 PULPROG zgpg30  
 TD 65536  
 SOLVENT CDCl3  
 NS 400  
 DS 0  
 SWH 25252.525 Hz  
 FIDRES 0.385323 Hz  
 AQ 1.2976128 sec  
 RG 2050  
 DW 19.800 usec  
 DE 6.50 usec  
 TE 293.4 K  
 D1 2.00000000 sec  
 d11 0.03000000 sec  
 DELTA 1.89999998 sec  
 TD0 1

==== CHANNEL f1 =====  
 NUC1 13C  
 P1 10.00 usec  
 PL1 6.20 dB  
 SFO1 100.6243395 MHz

==== CHANNEL f2 =====  
 CPDPRG2 waltz16  
 NUC2 1H  
 PCPD2 90.00 usec  
 PL2 -0.40 dB  
 PL12 15.80 dB  
 PL13 18.50 dB  
 SFO2 400.1316005 MHz

F2 - Processing parameters  
 SI 32768  
 SF 100.6127792 MHz  
 WDW EM  
 SSB 0  
 LB 1.00 Hz  
 GB 0  
 PC 1.40

27.0940  
 27.7962  
 28.4912  
 29.0894  
 30.9512  
 33.2325

76.6826  
 77.0000  
 77.2024  
 77.3184  
 84.8143

114.4947  
 116.3910  
 123.2004  
 124.2058  
 128.6566  
 128.7226  
 133.9255  
 135.2403

164.0710

189.7112

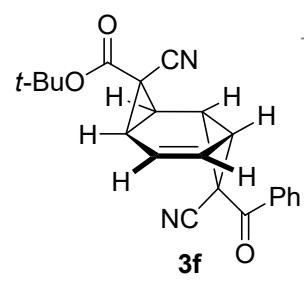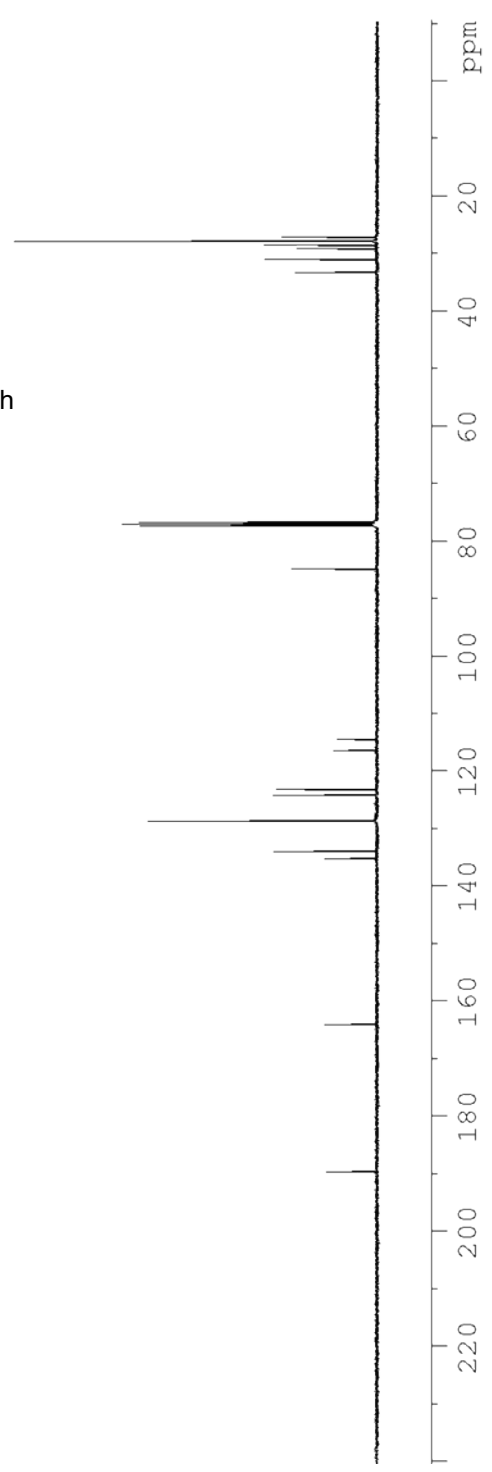

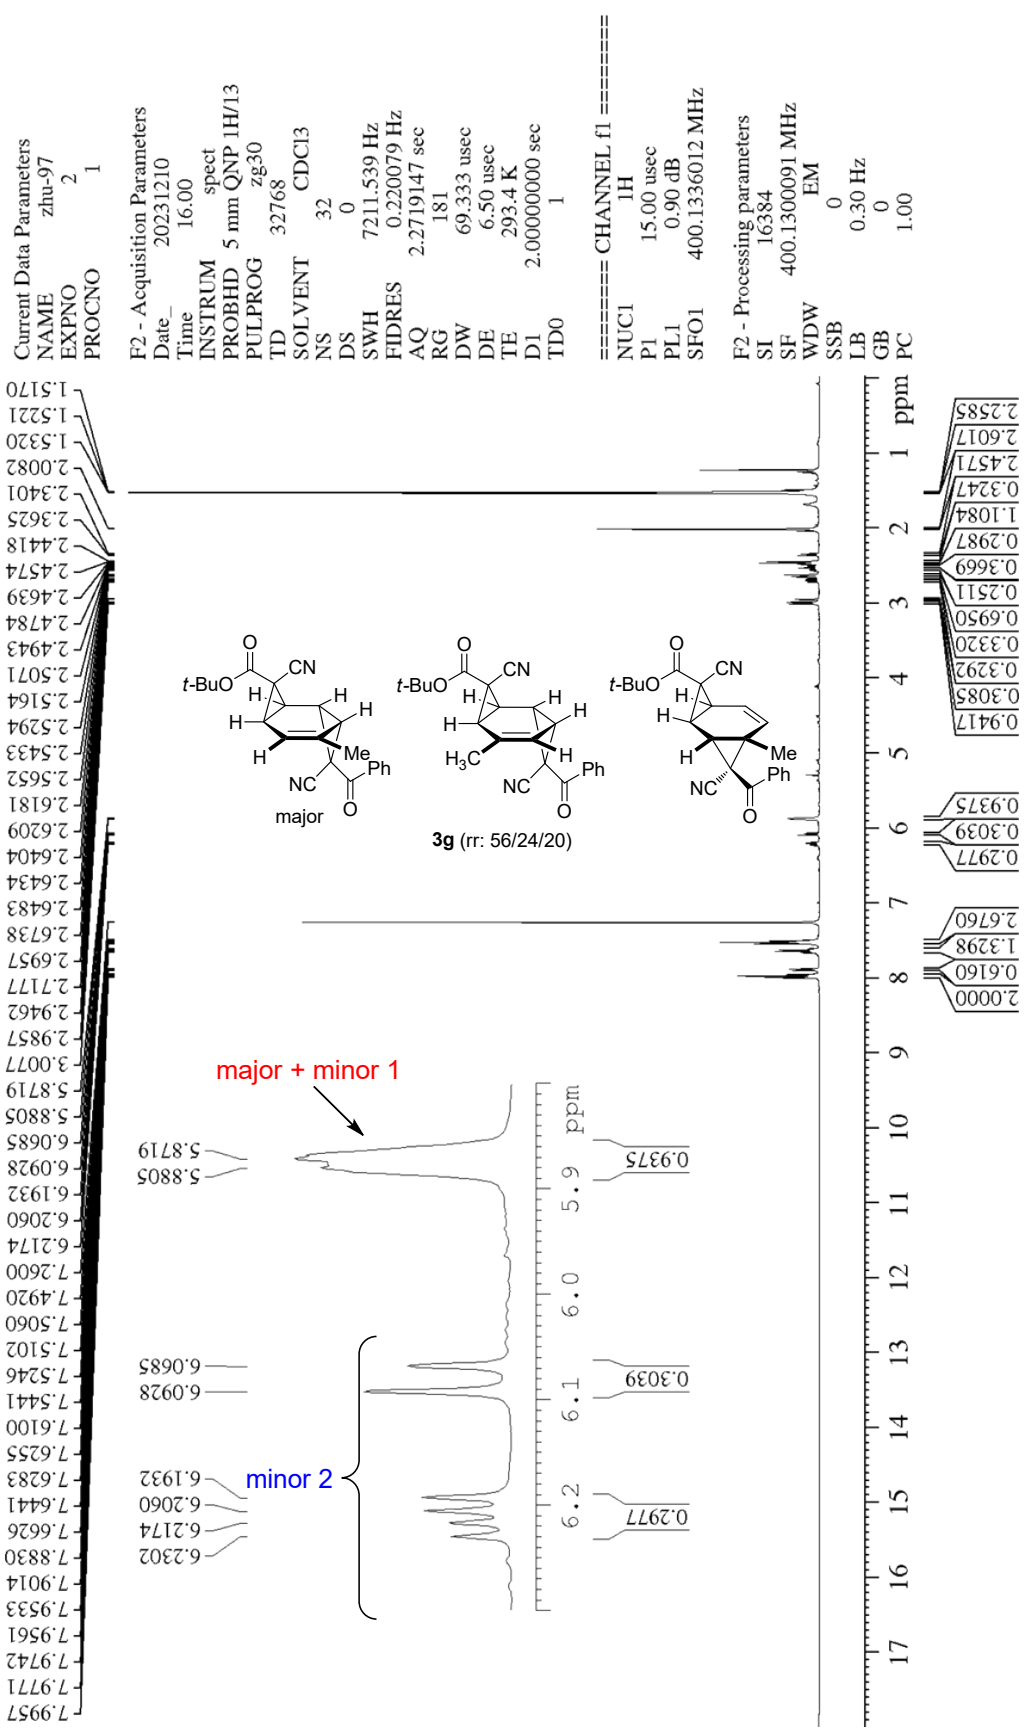

Current Data Parameters  
 NAME zhu-97  
 EXPNO 3  
 PROCNO 1

F2 - Acquisition Parameters  
 Date\_ 20231210  
 Time 16.04  
 INSTRUM spect  
 PROBHD 5 mm QNP 1H/13  
 PULPROG zgpg30  
 TD 65536  
 SOLVENT CDCl3  
 NS 1000  
 DS 0  
 SWH 25252.525 Hz  
 FIDRES 0.385323 Hz  
 AQ 1.2976128 sec  
 RG 2050  
 DW 19.800 usec  
 DE 6.50 usec  
 TE 293.5 K  
 D1 2.00000000 sec  
 d11 0.03000000 sec  
 DELTA 1.89999998 sec  
 TD0 1

==== CHANNEL f1 =====  
 NUC1 13C  
 P1 10.00 usec  
 PL1 6.20 dB  
 SFO1 100.6243395 MHz

==== CHANNEL f2 =====  
 CPDPRG[2] waltz16  
 NUC2 1H  
 PCPD2 90.00 usec  
 PL2 -0.40 dB  
 PL12 15.80 dB  
 PL13 18.50 dB  
 SFO2 400.1316005 MHz

F2 - Processing parameters  
 SI 32768  
 SF 100.6127763 MHz  
 WDW EM  
 SSB 0  
 LB 1.00 Hz  
 GB 0  
 PC 1.40

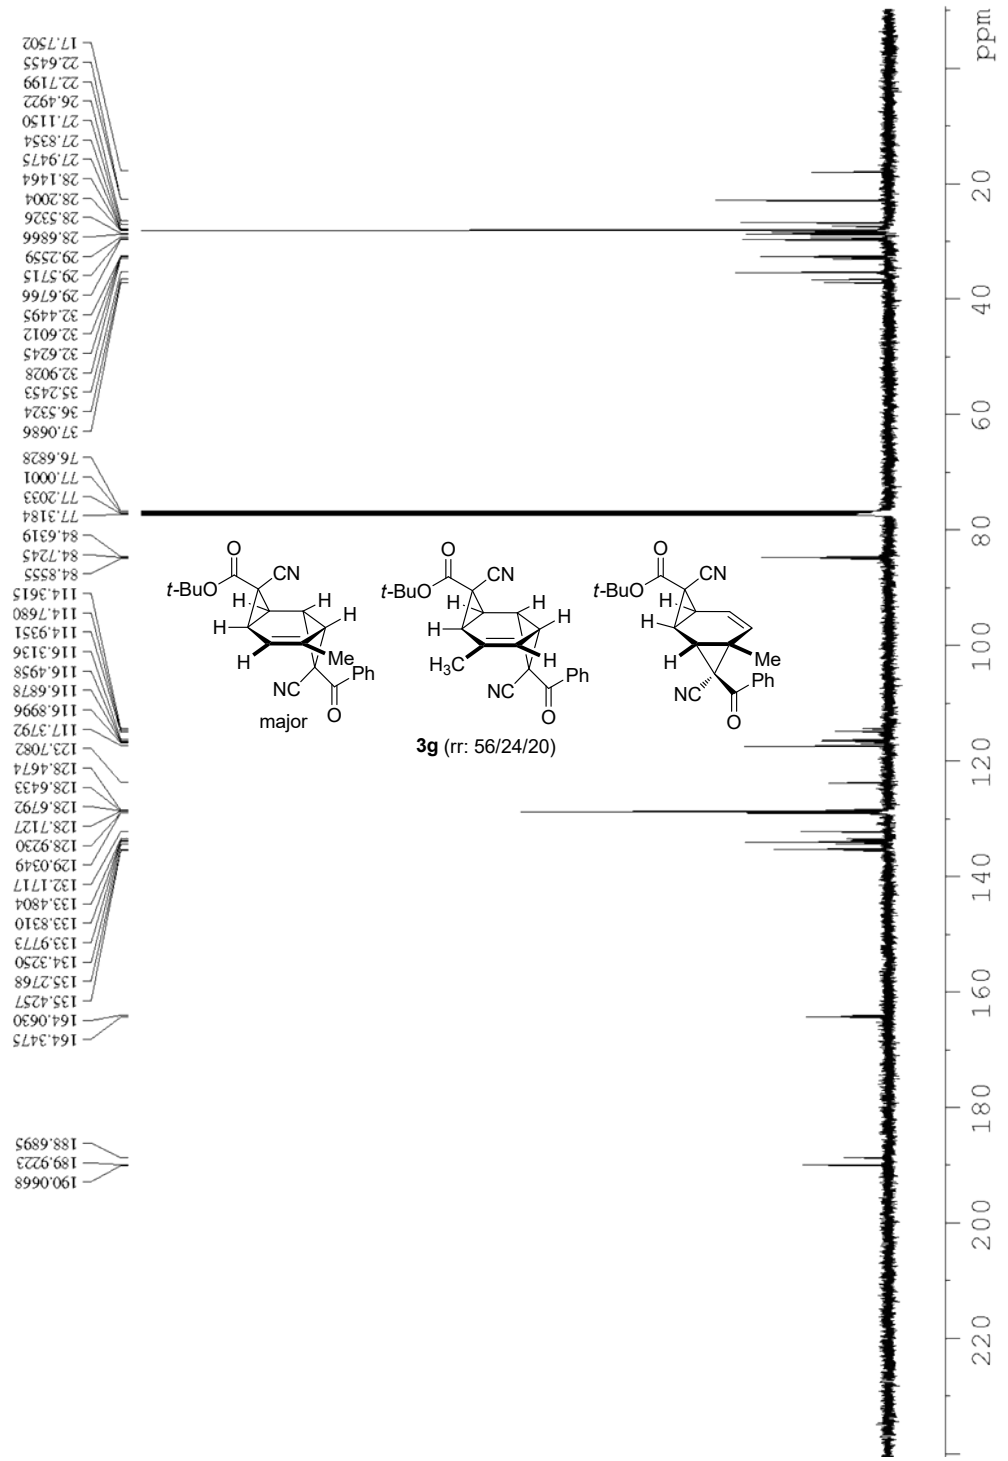

Current Data Parameters  
 NAME zhu-74  
 EXPNO 2  
 PROCNO 1

F2 - Acquisition Parameters  
 Date\_ 20230705  
 Time 14.48  
 INSTRUM spect  
 PROBHD 5 mm QNP 1H/13  
 PULPROG zg30  
 TD 32768  
 SOLVENT CDC13  
 NS 16  
 DS 0  
 SWH 7211.539 Hz  
 FIDRES 0.220079 Hz  
 AQ 2.2719147 sec  
 RG 181  
 DW 69.333 usec  
 DE 6.50 usec  
 TE 293.8 K  
 D1 2.0000000 sec  
 TD0 1

===== CHANNEL f1 =====  
 NUC1 1H  
 P1 15.00 usec  
 PL1 0.90 dB  
 SFO1 400.1336012 MHz  
 F2 - Processing parameters  
 SI 16384  
 SF 400.1300092 MHz  
 WDW EM  
 SSB 0  
 LB 0.30 Hz  
 GB 0  
 PC 1.00

7.2600  
6.1243  
6.1126  
6.1003  
6.0892  
6.0785  
6.0662  
6.0545  
4.2999  
4.2821  
4.2642  
4.2463  
2.7026  
2.6807  
2.6613  
2.6389  
2.5695  
2.5211  
2.5101  
2.4990  
2.4879  
2.4772  
2.4662  
2.4552

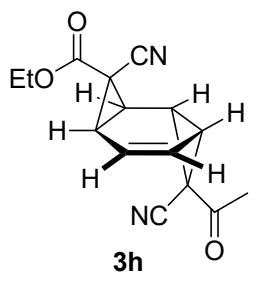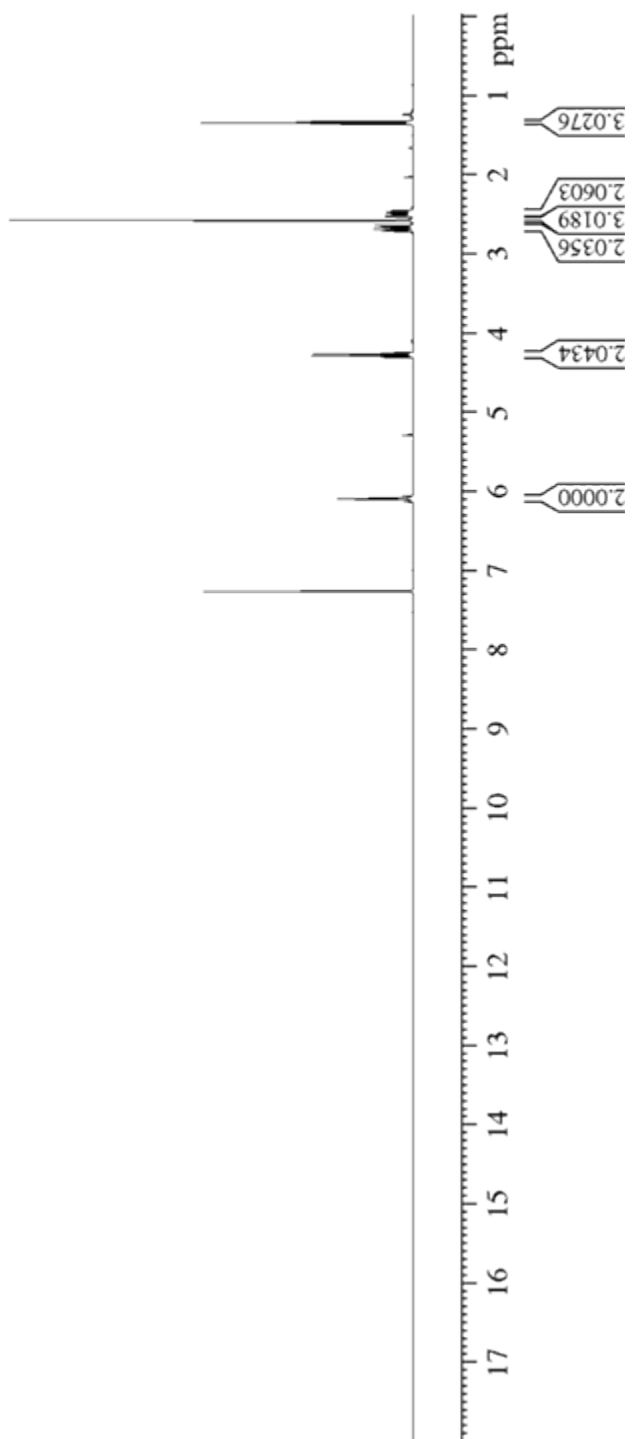



Current Data Parameters  
 NAME zhu-74  
 EXPNO 3  
 PROCNO 1

F2 - Acquisition Parameters  
 Date\_ 20230705  
 Time 14:56  
 INSTRUM spect  
 PROBHD 5 mm QNP 1H/13  
 PULPROG zgpg30  
 TD 65536  
 SOLVENT CDCl3  
 NS 400  
 DS 0  
 SWH 25252.525 Hz  
 FIDRES 0.385323 Hz  
 AQ 1.2976128 sec  
 RG 2050  
 DW 19.800 usec  
 DE 6.50 usec  
 TE 294.1 K  
 D1 2.00000000 sec  
 d11 0.03000000 sec  
 DELTA 1.89999998 sec  
 TD0 1

===== CHANNEL f1 =====  
 NUC1 13C  
 P1 10.00 usec  
 PL1 6.20 dB  
 SFO1 100.6243395 MHz

===== CHANNEL f2 =====  
 CPDPRG2 waltz16  
 NUC2 1H  
 PCPD2 90.00 usec  
 PL2 -0.40 dB  
 PL12 15.80 dB  
 PL13 18.50 dB  
 SFO2 400.1316005 MHz

F2 - Processing Parameters  
 SI 32768  
 SF 100.6127783 MHz  
 WDW EM  
 SSB 0  
 LB 1.00 Hz  
 GB 0  
 PC 1.40

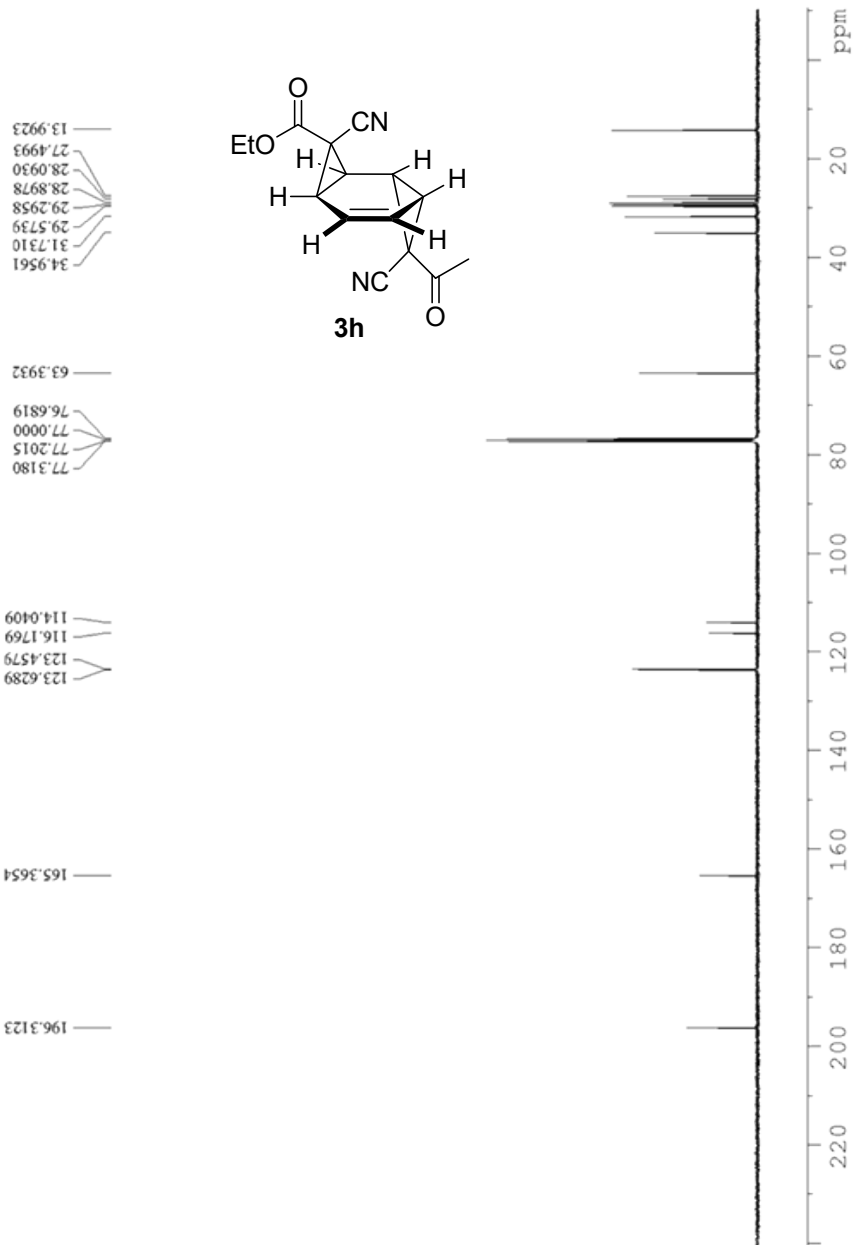

Current Data Parameters  
 NAME zhu-99  
 EXPNO 1  
 PROCNO 1

F2 - Acquisition Parameters  
 Date\_ 20231221  
 Time 11.39  
 INSTRUM spect  
 PROBHD 5 mm QNP 1H/13  
 PULPROG zg30  
 TD 32768  
 SOLVENT CDC13  
 NS 64  
 DS 0  
 SWH 7211.539 Hz  
 FIDRES 0.220079 Hz  
 AQ 2.2719147 sec  
 RG 203  
 DW 69.333 usec  
 DE 6.50 usec  
 TE 293.2 K  
 D1 2.0000000 sec  
 TD0 1

==== CHANNEL f1 =====  
 NUC1 1H  
 P1 15.00 usec  
 PL1 0.90 dB  
 SFO1 400.1336012 MHz

F2 - Processing parameters  
 SI 16384  
 SF 400.1300091 MHz  
 WDW EM  
 SSB 0  
 LB 0.30 Hz  
 GB 0  
 PC 1.00

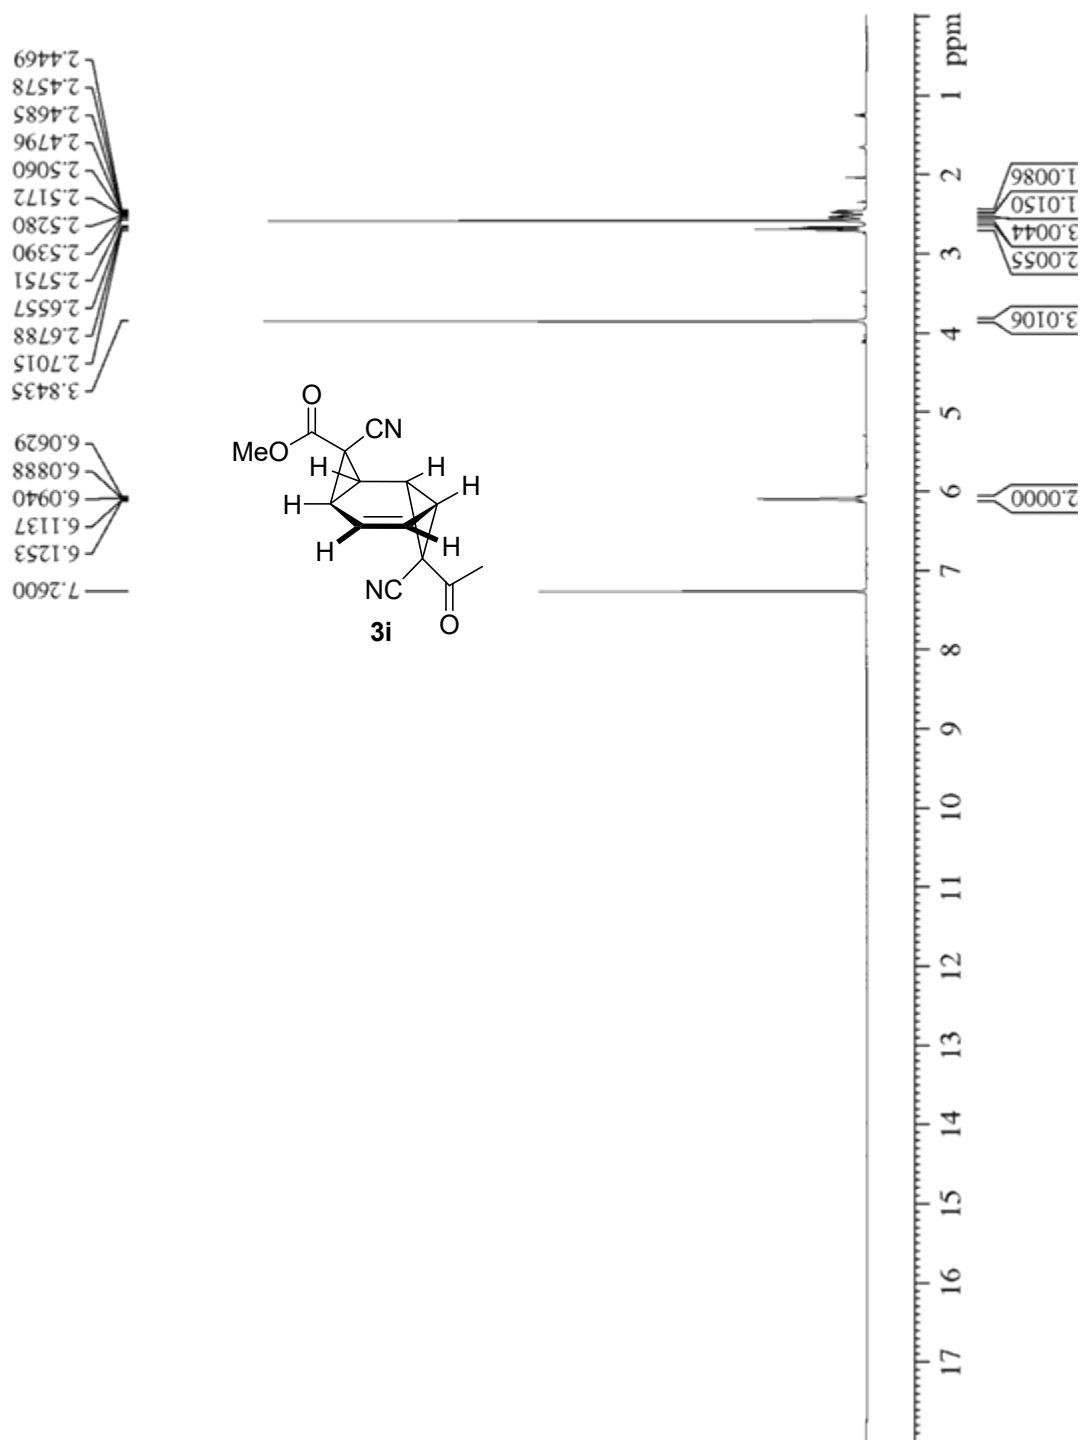

Current Data Parameters  
 NAME zhu-99  
 EXPNO 2  
 PROCNO 1

F2 - Acquisition Parameters  
 Date\_ 20231221  
 Time 11:47  
 INSTRUM spect  
 PROBHID 5 mm QNP 1H/13  
 PULPROG zgpg30  
 TD 65536  
 SOLVENT CDCl3  
 NS 240  
 DS 0  
 SWH 25252.525 Hz  
 FIDRES 0.385323 Hz  
 AQ 1.2976128 sec  
 RG 2050  
 DW 19.800 usec  
 DE 6.50 usec  
 TE 293.6 K  
 D1 2.00000000 sec  
 d11 0.03000000 sec  
 DELTA 1.89999998 sec  
 TD0 1

===== CHANNEL f1 =====  
 NUC1 13C  
 P1 10.00 usec  
 PL1 6.20 dB  
 SFO1 100.6243395 MHz

===== CHANNEL f2 =====  
 CPDPRG[2] waltz16  
 NUC2 1H  
 PCPD2 90.00 usec  
 PL2 -0.40 dB  
 PL12 15.80 dB  
 PL13 18.50 dB  
 SFO2 400.1316005 MHz

F2 - Processing parameters  
 SI 32768  
 SF 100.6127777 MHz  
 WDW EM  
 SSB 0  
 LB 1.00 Hz  
 GB 0  
 PC 1.40

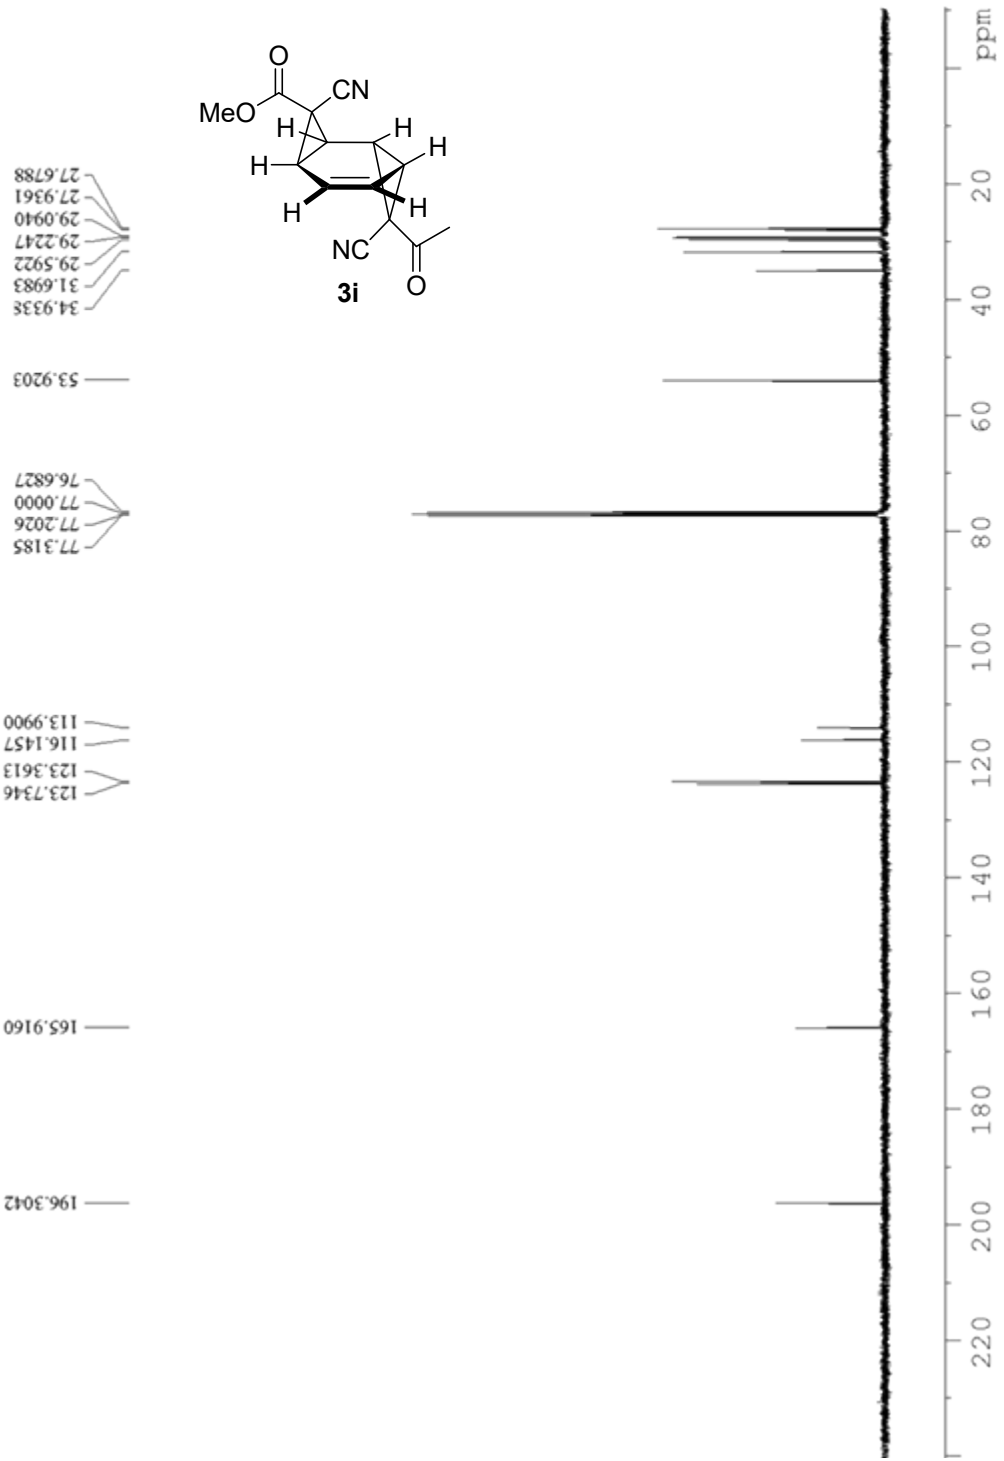

Current Data Parameters  
 NAME zhu-103  
 EXPNO 1  
 PROCNO 1

F2 - Acquisition Parameters  
 Date\_ 20240130  
 Time 15.20  
 INSTRUM spect  
 PROBHD 5 mm QNP 1H/13  
 PULPROG zg30  
 TD 32768  
 SOLVENT CDCl3  
 NS 16  
 DS 0  
 SWH 7211.539 Hz  
 FIDRES 0.220079 Hz  
 AQ 2.2719147 sec  
 RG 90.5  
 DW 69.333 usec  
 DE 6.50 usec  
 TE 293.3 K  
 D1 2.00000000 sec  
 TD0 1

==== CHANNEL f1 =====  
 NUC1 1H  
 P1 15.00 usec  
 PL1 0.90 dB  
 SFO1 400.1336012 MHz  
 F2 - Processing parameters  
 SI 16384  
 SF 400.1300091 MHz  
 WDW EM  
 SSB 0  
 LB 0.30 Hz  
 GB 0  
 PC 1.00

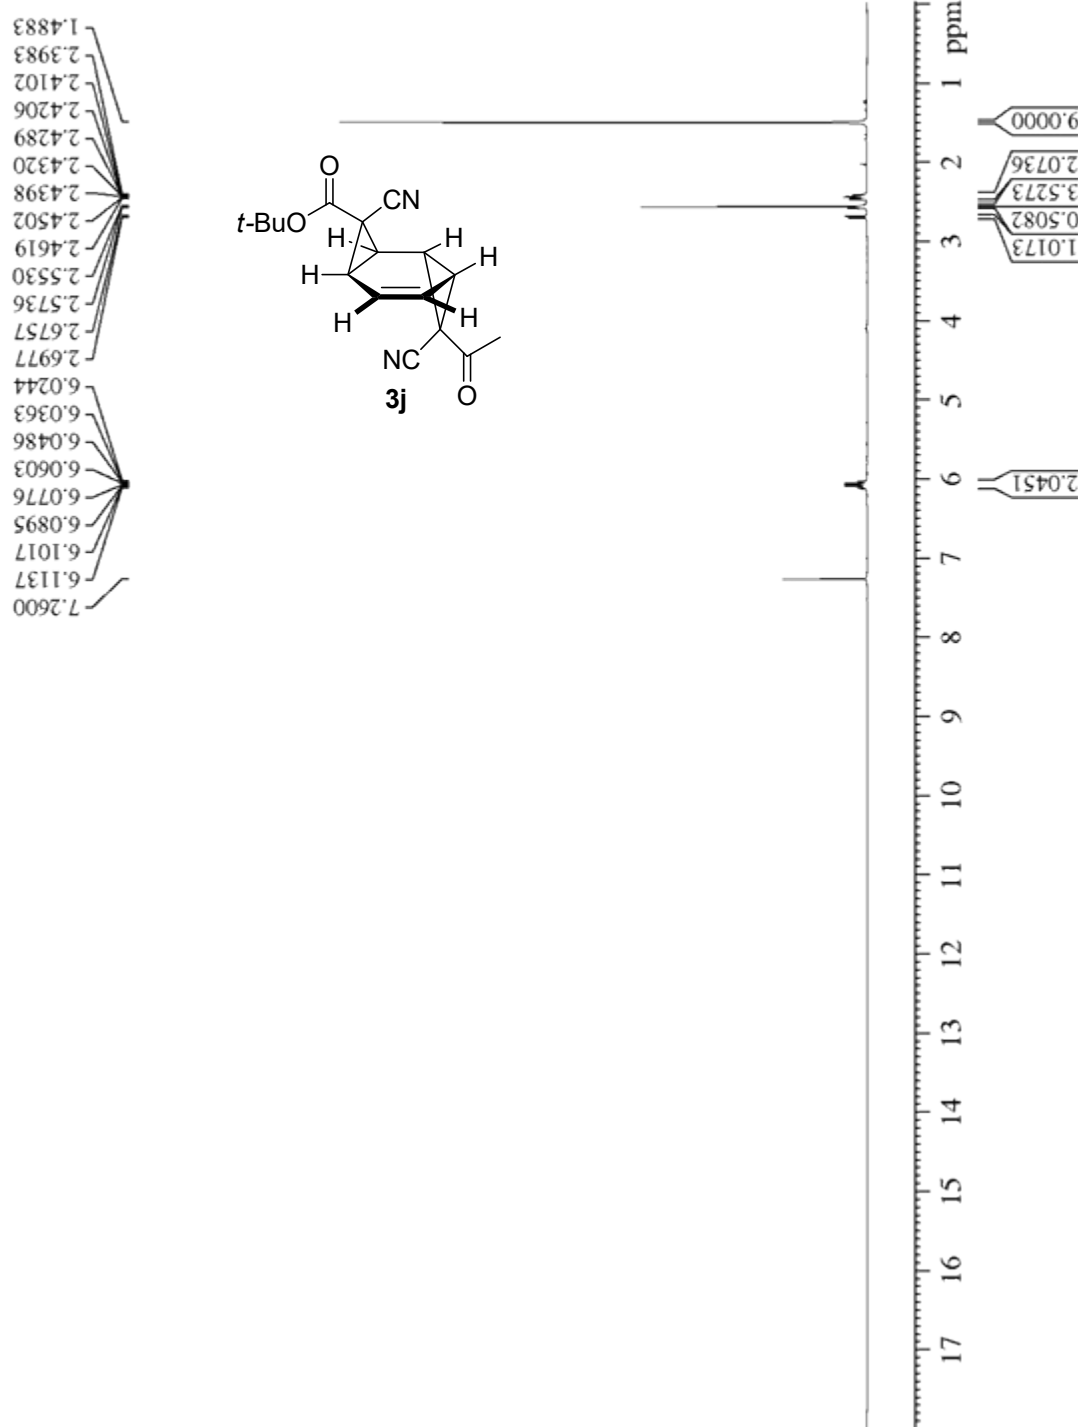

Current Data Parameters  
 NAME zhu-103  
 EXPNO 2  
 PROCNO 1

F2 - Acquisition Parameters  
 Date\_ 20240130  
 Time\_ 15.23  
 INSTRUM spect  
 PROBHD 5 mm QNP 1H/13  
 PULPROG zgpg30  
 TD 65536  
 SOLVENT CDCl3  
 NS 200  
 DS 0  
 SWH 25252.525 Hz  
 FIDRES 0.385323 Hz  
 AQ 1.2976128 sec  
 RG 2050  
 DW 19.800 usec  
 DE 6.50 usec  
 TE 293.4 K  
 D1 2.00000000 sec  
 d11 0.03000000 sec  
 DELTA 1.89999998 sec  
 TD0 1

===== CHANNEL f1 =====  
 NUC1 13C  
 P1 10.00 usec  
 PL1 6.20 dB  
 SFO1 100.6243395 MHz

===== CHANNEL f2 =====  
 CPDPRG2 waltz16  
 NUC2 1H  
 PCPD2 90.00 usec  
 PL2 -0.40 dB  
 PL12 15.80 dB  
 PL13 18.50 dB  
 SFO2 400.1316005 MHz

F2 - Processing parameters  
 SI 32768  
 SF 100.6127810 MHz  
 WDW EM  
 SSB 0  
 LB 1.00 Hz  
 GB 0  
 PC 1.40

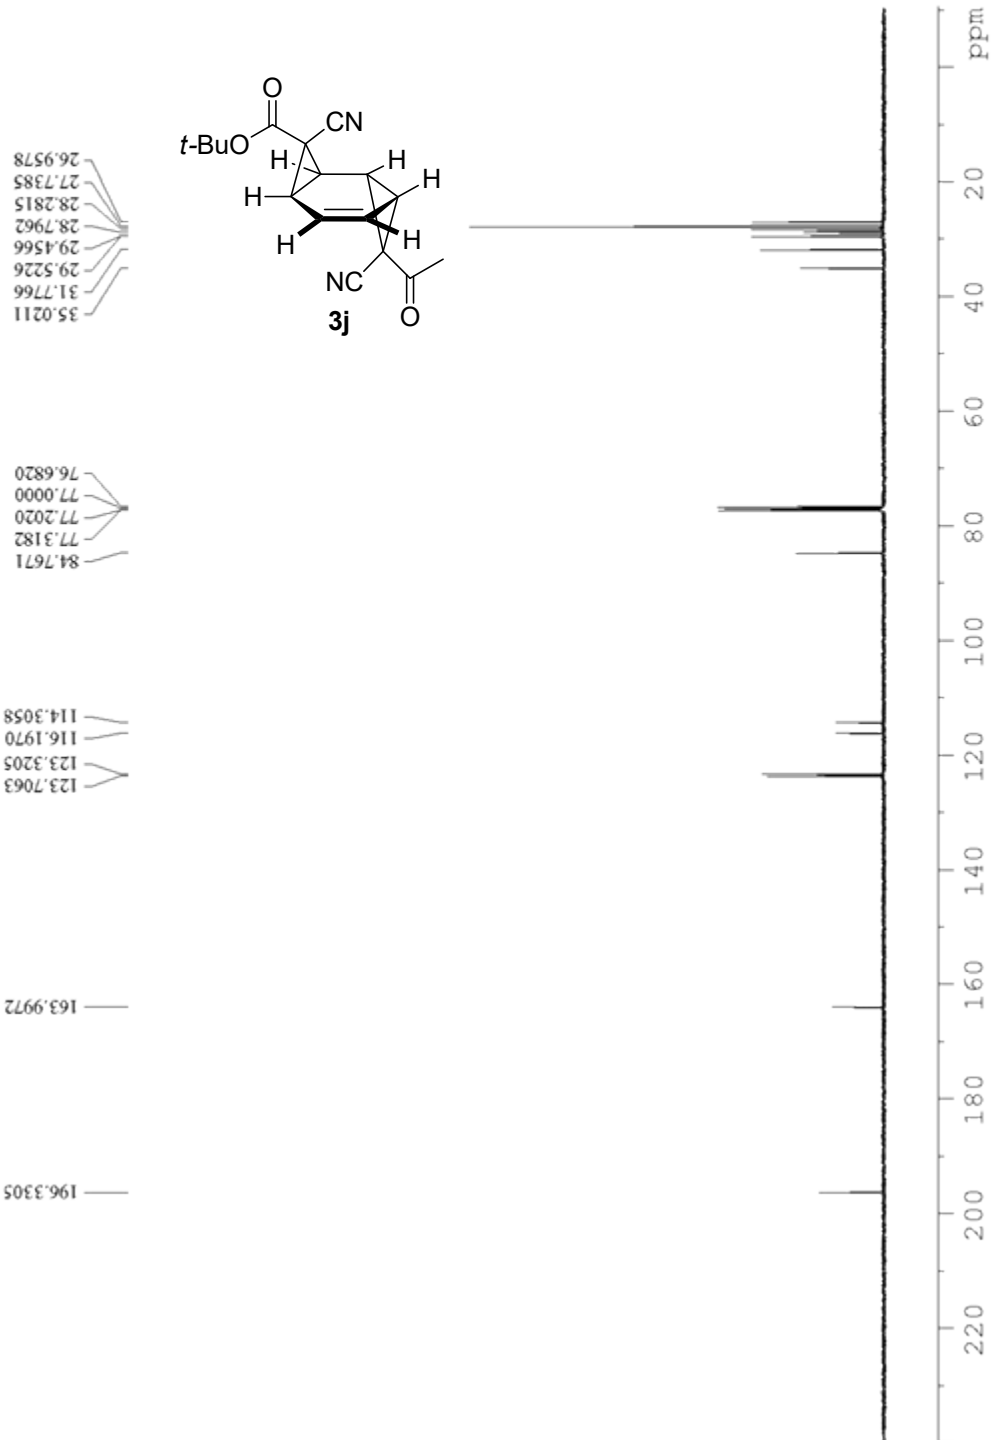

## 8) Preparation of **7** via SmI<sub>2</sub>-promoted Ring-opening of **3**

### i) General Procedures

*Procedure A:* A solution of **3** (0.152 mmol) in THF (7.1 mL, 0.0214 M) was stirred at -40 °C for 50 min followed by the injection of SmI<sub>2</sub> reagent (purchased as a 0.1 M solution in THF, 7.6 mL, 0.76 mmol, 5 equiv) via a syringe in one portion. The resulting blue mixture was continued to stir at -40 °C for 0.5 h, then quenched by adding 10 mL of saturated Na<sub>2</sub>S<sub>2</sub>O<sub>3</sub> aqueous solution, and diluted with ethyl acetate (200 mL). The solution was washed with water (50 mL x 1) and brine (50 mL x 1), and concentrated in vacuo. The crude residue was purified by chromatography on silica gel to afford the mixtures of **7a/7a'** to **7f/7f'**.

*Procedure B:* The procedure is similar to that described for *Procedure A*, except for conducting the reaction at ambient temperature. After the introduction of SmI<sub>2</sub> to a THF solution of **3** at 25 °C, the resulting blue mixture was stirred until the starting material had disappeared (TLC). The reaction was then quenched by adding Na<sub>2</sub>S<sub>2</sub>O<sub>3</sub> aqueous solution, diluted with ethyl acetate, washed with water and brine, and concentrated under vacuum. The crude residue was subjected to the chromatographic purification on silica gel to afford the mixtures of **7g/7g'** and **7h/7h'**.

### ii) Preparation of **7a/7a'** and <sup>1</sup>H-NMR <sup>13</sup>C-NMR, DEPT, NOESY spectra

*Trans*-Ethyl 2-cyano-2-[6-(1-cyano-2-oxo-2-phenylethyl)cyclohexa-2,4-dien-1-yl]acetate (**7a**) and *Cis*-Ethyl 2-cyano-2-[4-(1-cyano-2-oxo-2-phenylethyl)cyclohexa-2,5-dien-1-yl]acetate (**7a'**)

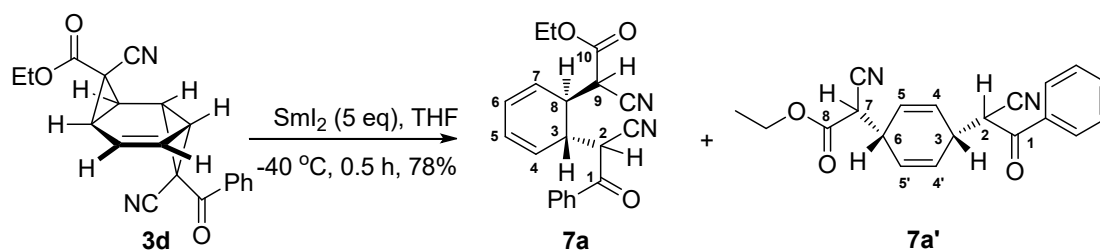

The titled compounds were synthesized from **3d** by following *Procedure A*. After chromatography (silica gel; hexane/ethyl acetate = 5:1, 2:1), a mixture of **7a/7a'** was obtained in 78% yield as a yellow solid (rr: 50/50). (**7a** and **7a'** each contains two diastereomeric pairs deriving from the configurations at C-2/C-9 and C-2/C-7).

IR (neat): 3054, 2982, 2249, 2205, 1739, 1694, 1682, 1260, 1026, 800, 692 cm<sup>-1</sup>.

<sup>1</sup>H NMR (600 MHz, CDCl<sub>3</sub>) Phenyl protons of **7a/7a'**: δ 8.01-7.93 (m, 2 H), 7.70-7.65 (m, 1 H), 7.56-7.50 (m, 2 H); Olefinic protons of **7a/7a'**: δ 6.30-6.26 (m, 1 H), 6.25-6.21 (m, 0.5 H), 6.12-6.09 (m, 0.5 H), 6.03-5.98 (m, 0.75 H), 5.87 (dd, *J* = 9.0, 6.6 Hz, 0.25 H, H<sub>4</sub>/H<sub>4'</sub> or H<sub>5</sub>/H<sub>5'</sub> of **7a'**, deduced from the NOESY), 5.82-5.76 (m, 0.5 H, C=CH), 5.71 (dd, *J* = 9.6, 6.0 Hz, 0.25 H, C=CH), 5.67 (dd, *J* = 9.0, 6.0 Hz, 0.25 H, C=CH, H<sub>4</sub>/H<sub>4'</sub> or H<sub>5</sub>/H<sub>5'</sub> of **7a'**, deduced from the NOESY); H-2 of **7a/7a'**: δ 4.49 (d, *J*

= 9.0 Hz, 0.25 H, PhCO-CH-CN), 4.48 (d,  $J = 8.4$  Hz, 0.25 H, PhCO-CH-CN), 4.40 (d,  $J = 9.6$  Hz, 0.25 H, PhCO-CH-CN), 4.39 (d,  $J = 9.0$  Hz, 0.25 H, PhCO-CH-CN); Methylene protons of EtO:  $\delta$  4.33-4.26 (m, 2 H); H-9 of **7a** and H-7 of **7a'**:  $\delta$  3.58 (d,  $J = 9.0$  Hz, 0.5 H, EtOCO-CH-CN), 3.56 (d,  $J = 9.0$  Hz, 0.25 H, EtOCO-CH-CN), 3.54 (d,  $J = 7.2$  Hz, 0.25 H, EtOCO-CH-CN); H-3 and H-8 of 7a/H-3 and H-6 of 7a' (the signals showing the NOESY correlations are marked in the same color):  $\delta$  **3.44** (br t,  $J = 6.6$  Hz, 0.25 H), **3.37** (dd,  $J = 9.0, 6.6$  Hz, 0.25 H), **3.36-3.34** (m, 0.25 H, from **7a**, deduced from the NOESY), **3.31** (br t,  $J = 7.2$  Hz, 0.25 H, from **7a'**, deduced from the NOESY), 3.22 (ddd,  $J = 9.0, 6.0, 1.1$  Hz, 0.25 H, allylic C-H), 3.13 (dd,  $J = 9.0, 6.0$  Hz, 0.25 H, allylic C-H), **2.80** (br t,  $J = 7.2$  Hz, 0.25 H, allylic C-H, from **7a'**), **2.73** (ddd,  $J = 9.0, 6.0, 1.0$  Hz, 0.25 H, from **7a**, deduced from the NOESY); Methyl protons of EtO:  $\delta$  1.37 (t,  $J = 7.2$  Hz, 0.75 H, CH<sub>3</sub>CH<sub>2</sub>O), 1.35 (t,  $J = 7.2$  Hz, 0.75 H, CH<sub>3</sub>CH<sub>2</sub>O), 1.34 (t,  $J = 7.2$  Hz, 0.75 H, CH<sub>3</sub>CH<sub>2</sub>O), 1.31 (t,  $J = 7.2$  Hz, 0.75 H, CH<sub>3</sub>CH<sub>2</sub>O) ppm.

<sup>13</sup>C NMR (100 MHz, CDCl<sub>3</sub>):  $\delta$  188.8 (x 2, PhCO), 188.7 (PhCO), 188.6 (PhCO), 164.5 (EtOCO), 164.3 (EtOCO), 164.3 (EtOCO), 164.2 (EtOCO), 135.1 (CH), 135.0 (CH), 134.9 (CH), 134.8 (CH), 134.3 (C x 2), 134.0 (C), 133.9 (C), 129.3 (CH), 129.2 (CH), 129.1 (CH), 128.9 (CH x 2), 128.8 (CH), 127.4 (CH), 127.2 (CH), 126.8 (CH x 2), 126.7 (CH), 126.4 (CH), 126.2 (CH), 124.5 (CH), 124.0 (CH), 123.8 (CH), 123.7 (CH), 123.5 (CH), 122.6 (CH), 122.5 (CH), 115.6 (CN), 115.6 (CN), 115.5 (CN), 115.4 (CN), 115.2 (CN), 115.1 (CN), 114.9 (CN), 114.8 (CN), 63.4 (CH<sub>2</sub>O), 63.4 (CH<sub>2</sub>O), 63.3 (CH<sub>2</sub>O), 63.2 (CH<sub>2</sub>O), 41.2 (CH), 40.9 (CH), 40.8 (CH), 40.4 (CH), 40.0 (CH), 39.6 (CH), 39.4 (CH), 39.1 (CH), 36.4 (CH), 36.0 (CH), 35.7 (CH), 35.5 (CH), 35.4 (CH), 35.2 (CH), 34.7 (CH x 2), 14.0 (CH<sub>3</sub>), 13.9 (CH<sub>3</sub>), 13.9 (CH<sub>3</sub>), 13.8 (CH<sub>3</sub>) ppm.

HRMS-EI:  $m/z$  [M]<sup>+</sup> calcd. for C<sub>20</sub>H<sub>18</sub>N<sub>2</sub>O<sub>3</sub>: 334.1317; found: 334.1317.

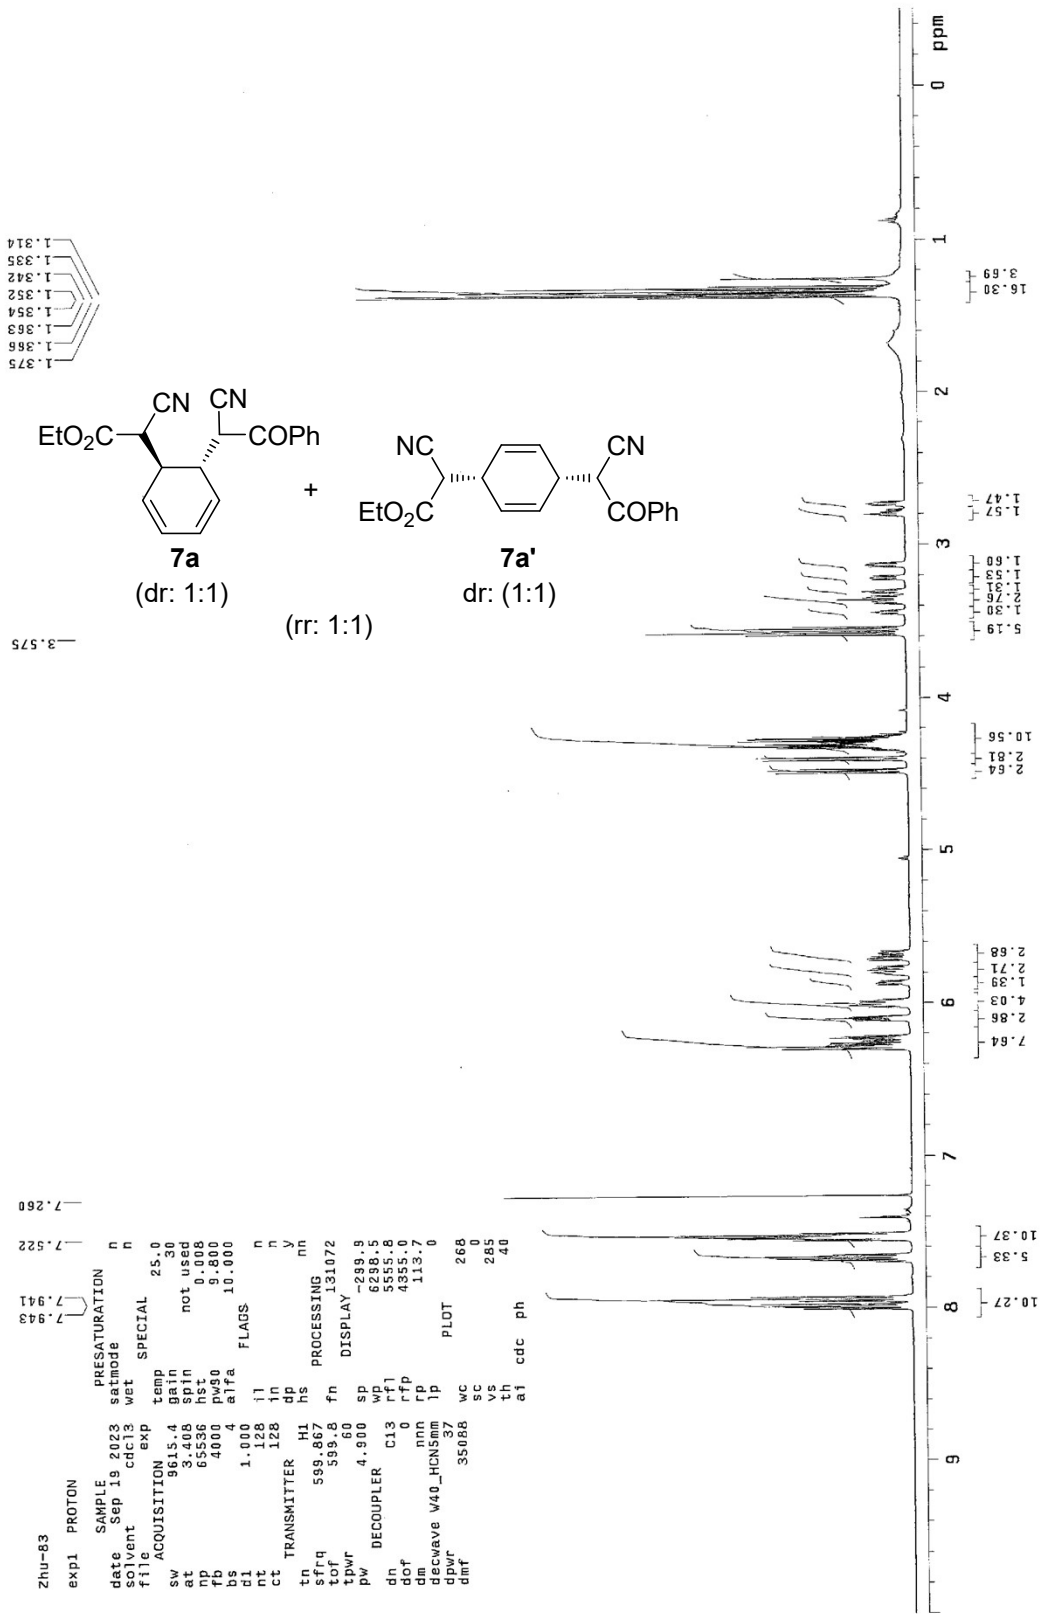



Current Data Parameters  
 NAME zhu-83  
 EXPNO 5  
 PROCNO 1

F2 - Acquisition Parameters  
 Date\_ 20230826  
 Time 22.16  
 INSTRUM spect  
 PROBHD 5 mm QNP 1H/13  
 PULPROG zgpg30  
 TD 65536  
 SOLVENT CDCl3  
 NS 2400  
 DS 0  
 SWH 25252.525 Hz  
 FIDRES 0.385323 Hz  
 AQ 1.2976128 sec  
 RG 2050  
 DW 19.800 usec  
 DE 6.50 usec  
 TE 295.1 K  
 D1 2.00000000 sec  
 d11 0.03000000 sec  
 DELTA 1.89999998 sec  
 TDO 1

===== CHANNEL f1 =====  
 NUC1 13C  
 P1 10.00 usec  
 PL1 6.20 dB  
 SFO1 100.6243395 MHz

===== CHANNEL f2 =====  
 CPDPRG2 waltz16  
 NUC2 1H  
 PCPD2 90.00 usec  
 PL2 -0.40 dB  
 PL12 15.80 dB  
 PL13 18.50 dB  
 SFO2 400.1316005 MHz

F2 - Processing parameters  
 SI 32768  
 SF 100.6127744 MHz  
 WDW EM  
 SSB 0  
 LB 1.00 Hz  
 GB 0  
 PC 1.40

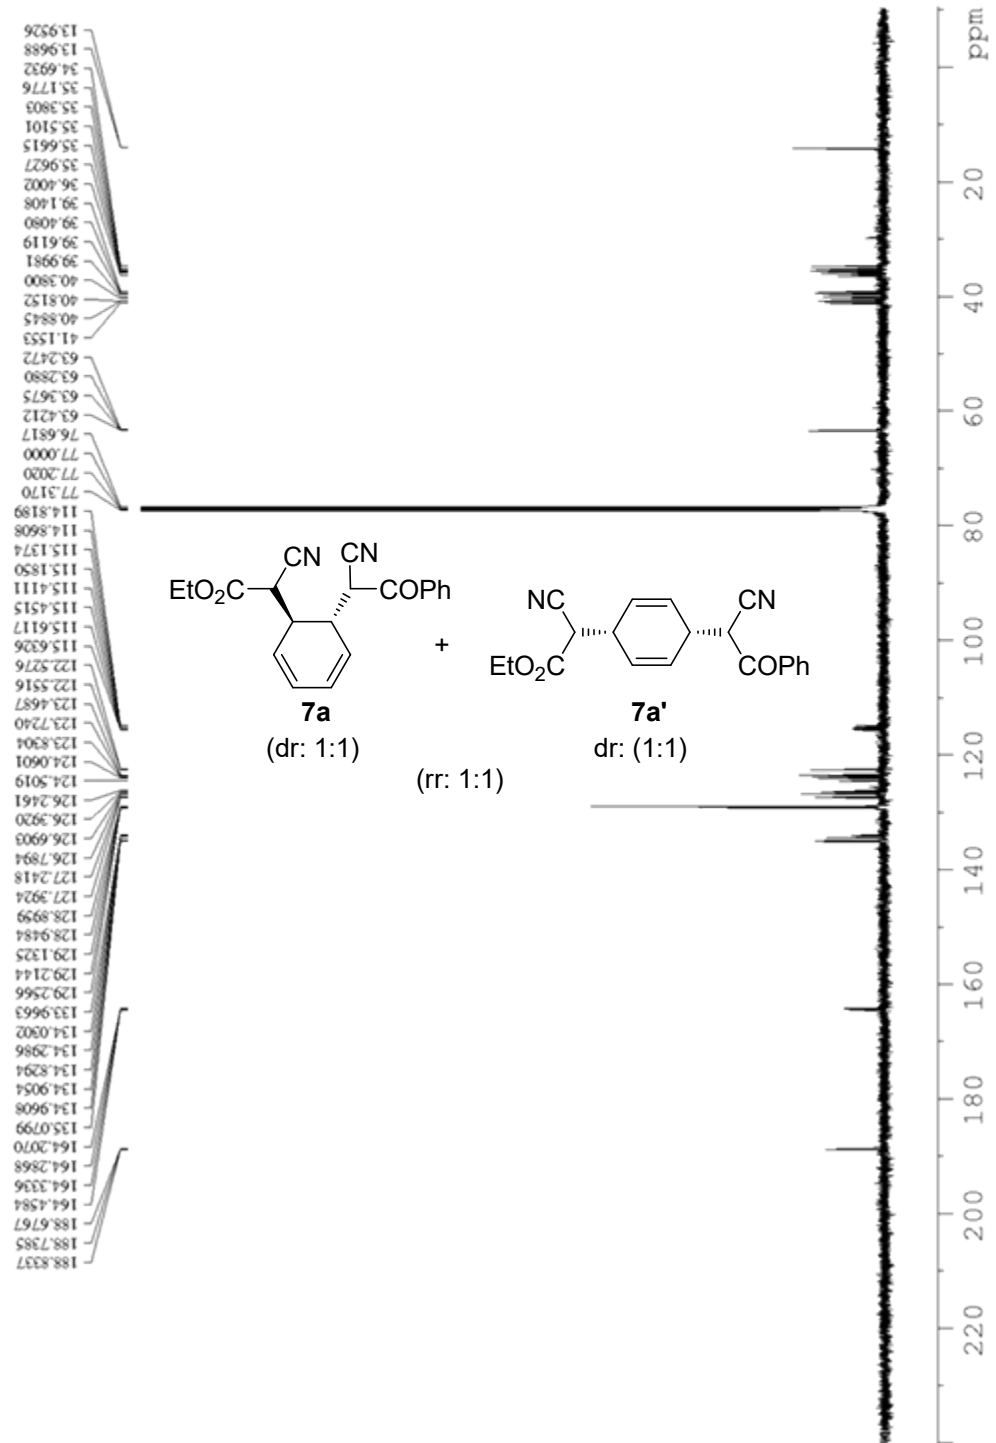

DEPT 90, 135 and  $^{13}\text{C}$  NMR spectra (100 MHz):

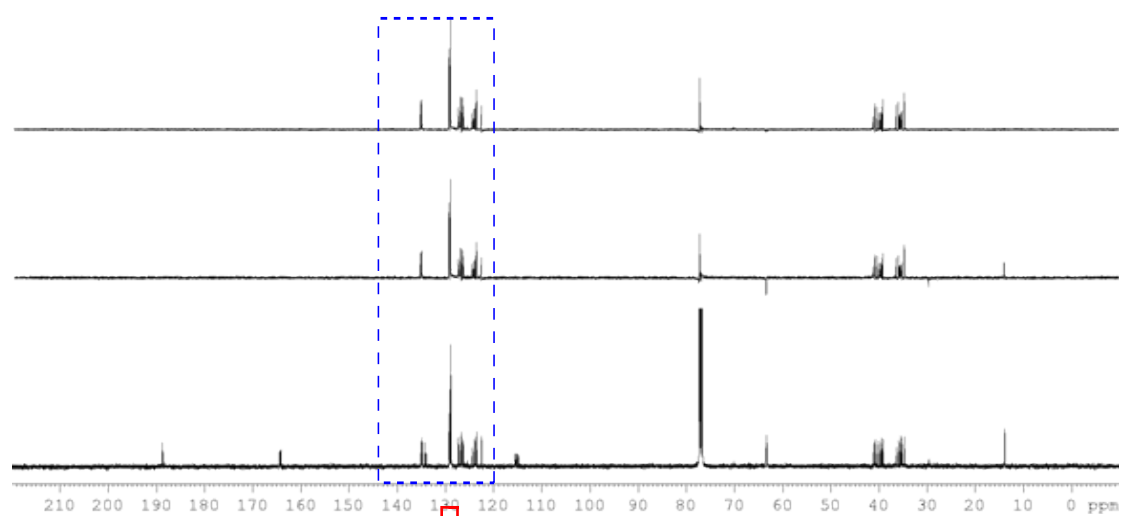

phenyl and olefinic carbons

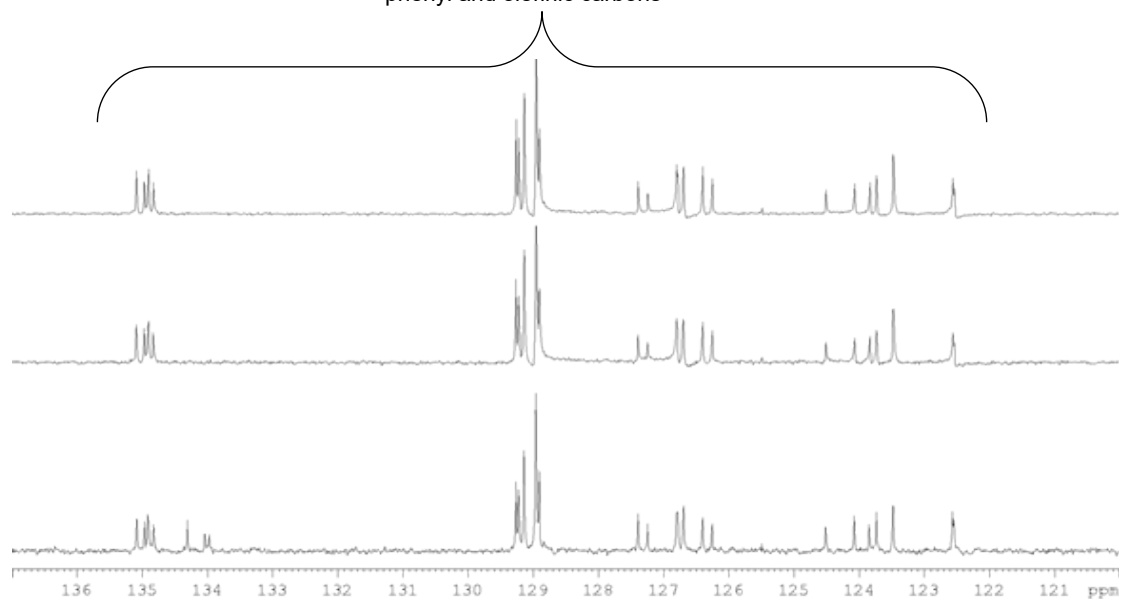

NOESY spectrum (600 MHz):

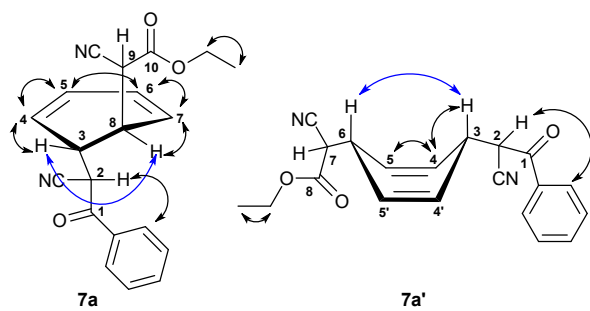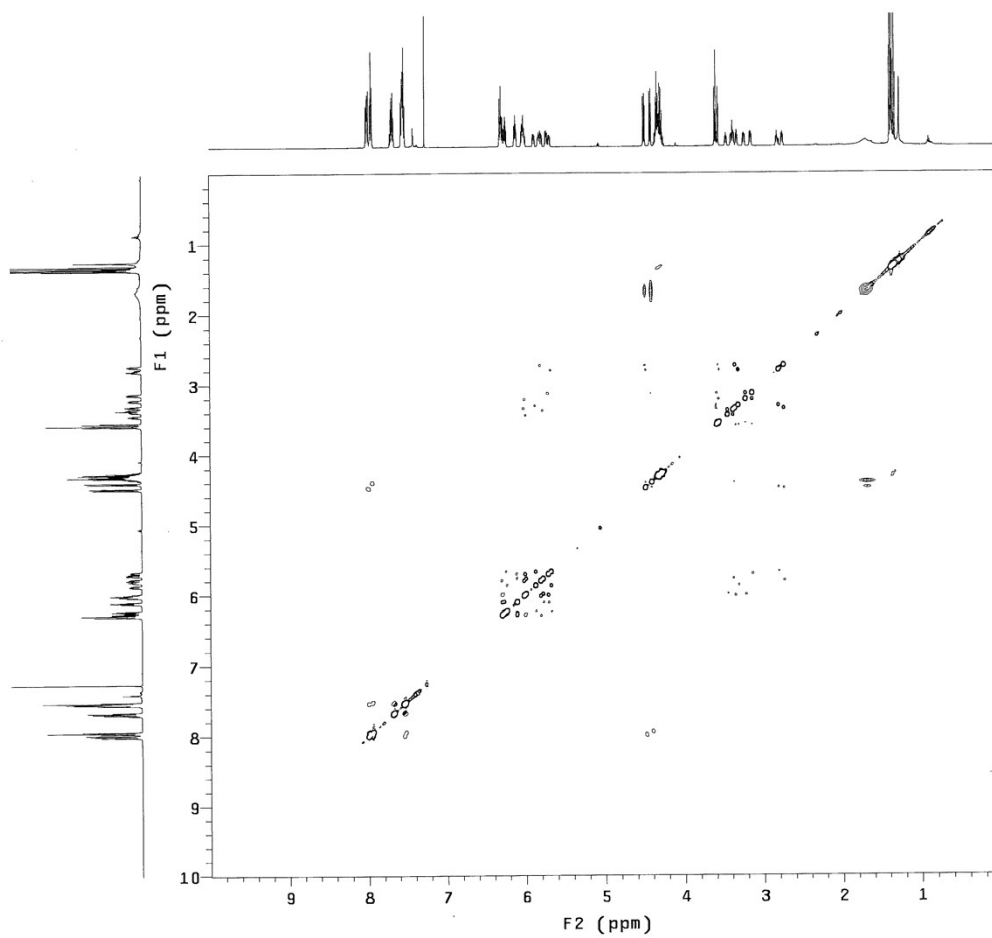

(Expansion-1):

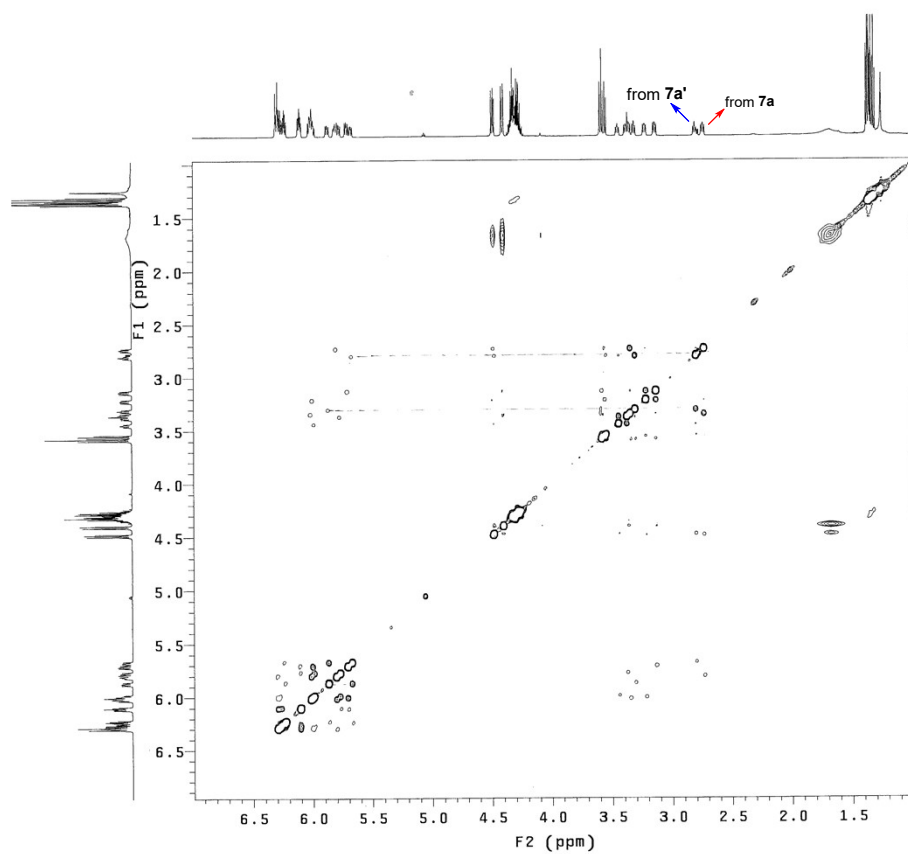

(Expansion-2):

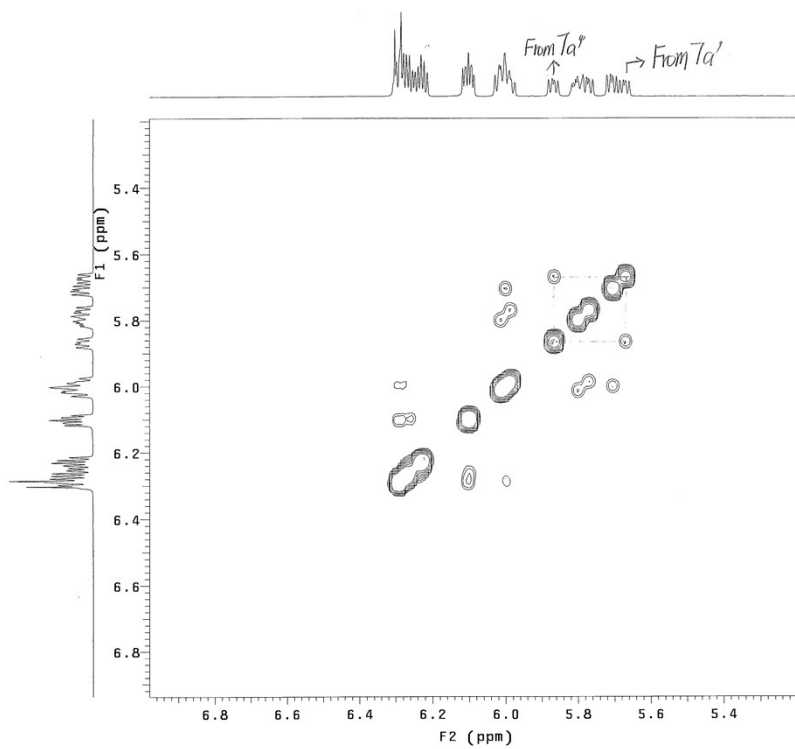

(Expansion-3):

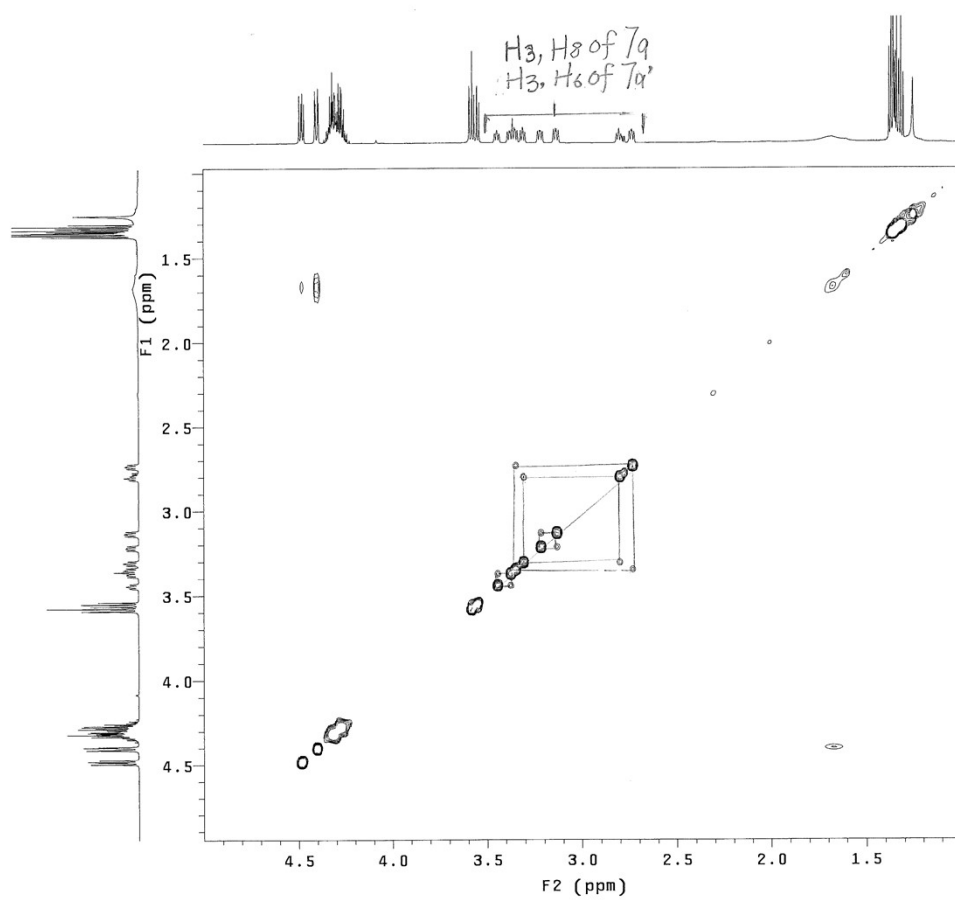

### iii) Preparation of **7b/7b'** and <sup>1</sup>H-NMR <sup>13</sup>C-NMR, DEPT spectra

*Trans*-Methyl 2-cyano-2-[6-(-1-cyano-2-oxo-2-phenylethyl)cyclohexa-2,4-dien-1-yl]acetate (**7b**) and *Cis*-Methyl 2-cyano-2-[4-(1-cyano-2-oxo-2-phenylethyl)cyclohexa-2,5-dien-1-yl]acetate (**7b'**)

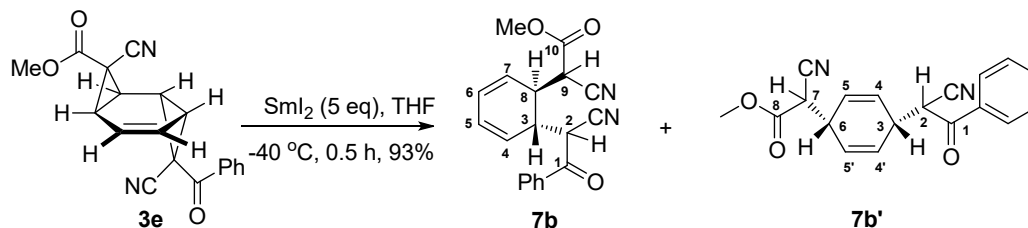

The titled compounds were synthesized from **3e** by following *Procedure A*. After chromatography (silica gel; hexane/ethyl acetate = 6:1, 3:1 2:1), a mixture of **7b/7b'** was obtained in 93% yield as a colorless oil (rr: 50/50). (**7b** and **7b'** each includes two diastereomeric pairs deriving from the configurations at C-2/C-9 and C-2/C-7).

IR (neat): 3049, 2956, 2247, 1746, 1694, 1261, 690, 668  $\text{cm}^{-1}$ .

<sup>1</sup>H NMR (400 MHz,  $\text{CDCl}_3$ ) Phenyl protons of **7b/7b'**:  $\delta$  8.00-7.92 (m, 2 H), 7.71-7.64 (m, 1 H), 7.56-7.50 (m, 2 H); Olefinic protons of **7a/7a'**:  $\delta$  6.30-6.21 (m, 1.5 H), 6.13-6.08 (m, 0.5 H), 6.00-5.97 (m, 0.75 H), 5.86 (dd,  $J = 9.3, 5.9$  Hz, 0.25 H), 5.80-5.64 (m, 1 H); H-2 of **7b/7b'**:  $\delta$  4.48 (d,  $J = 9.6$  Hz, 0.25 H, PhCO-CH-CN), 4.47 (d,  $J = 8.5$  Hz, 0.25 H, PhCO-CH-CN), 4.40 (d,  $J = 9.2$  Hz, 0.5 H, PhCO-CH-CN); CH<sub>3</sub>O of **7b/7b'**:  $\delta$  3.87 (s, 0.75 H), 3.85 (s, 0.75 H), 3.82 (s, 0.75 H), 3.81 (s, 0.75 H);

H-9 of **7b** and H-7 of **7b'**:  $\delta$  3.62 (d,  $J = 8.8$  Hz, 0.25 H, EtOCO-CH-CN), 3.60 (d,  $J = 7.7$  Hz, 0.25 H, EtOCO-CH-CN), 3.58 (d,  $J = 8.8$  Hz, 0.25 H, EtOCO-CH-CN), 3.57 (d,  $J = 7.7$  Hz, 0.25 H, EtOCO-CH-CN); H-3 and H-8 of **7b/H-3 and H-6 of **7b'****:  $\delta$  3.44 (br t,  $J = 7.3$  Hz, 0.25 H), 3.36 (dd,  $J = 8.8, 6.2$  Hz, 0.25 H), 3.37-3.27 (m, 0.5 H), 3.21 (br t,  $J = 7.7$  Hz, 0.25 H), 3.13 (dd,  $J = 8.8$  Hz, 0.25 H), 2.79 (br t,  $J = 7.1$  Hz, 0.25 H, from **7b'**), 2.72 (ddd,  $J = 8.8, 6.0, 1.0$  Hz, 0.25 H, from **7b**) ppm.

<sup>13</sup>C NMR (100 MHz,  $\text{CDCl}_3$ ):  $\delta$  188.8 (x 2, PhCO), 188.7 (PhCO), 188.6 (PhCO), 164.9 (MeOCO), 164.8 (MeOCO), 164.8 (MeOCO), 164.7 (MeOCO), 135.1 (CH), 135.0 (CH), 134.9 (CH), 134.8 (CH), 134.2 (x 2, C), 134.0 (C), 133.9 (C), 129.2 (CH), 129.2 (CH), 129.1 (CH), 128.9 (CH), 127.4 (CH), 127.3 (CH), 126.8 (CH), 126.8 (CH), 126.7 (CH), 126.6 (CH), 126.4 (CH), 126.2 (CH), 124.4 (CH), 123.9 (CH), 123.8 (CH), 123.6 (CH), 123.4 (CH), 123.3 (CH), 122.4 (CH), 122.3 (CH), 115.6 (CN), 115.5 (CN), 115.4 (CN), 115.4 (CN), 115.0 (CN), 114.9 (CN), 114.7 (CN), 114.6 (CN), 53.8 (CH<sub>3</sub>O x 2), 53.8 (CH<sub>3</sub>O), 53.7 (CH<sub>3</sub>O), 41.2 (CH), 41.0 (CH), 40.8 (CH), 40.2 (CH), 39.8 (CH), 39.6 (CH), 39.3 (CH), 39.1 (CH), 36.4 (CH), 36.0 (CH), 35.5 (CH), 35.4 (CH), 35.2 (CH), 34.6 (CH), 34.5 (CH x 2) ppm.

HRMS-EI:  $m/z$  [M]<sup>+</sup> calcd. for  $\text{C}_{19}\text{H}_{16}\text{N}_2\text{O}_3$ : 320.1161; found: 320.1163.

Current Data Parameters  
 NAME zhu-93  
 EXPNO 2  
 PROCNO 1

F2 - Acquisition Parameters  
 Date\_ 20231109  
 Time 22.04  
 INSTRUM spect  
 PROBHD 5 mm QNP 1H/13  
 PULPROG zg30  
 TD 32768  
 SOLVENT CDCl3  
 NS 160  
 DS 0  
 SWH 7211.539 Hz  
 FIDRES 0.220079 Hz  
 AQ 2.2719147 sec  
 RG 256  
 DW 69.333 usec  
 DE 6.50 usec  
 TE 292.7 K  
 D1 2.00000000 sec  
 TD0 1

==== CHANNEL f1 =====  
 NUC1 1H  
 P1 15.00 usec  
 PL1 0.90 dB  
 SFO1 400.1336012 MHz

F2 - Processing parameters  
 SI 16384  
 SF 400.1300092 MHz  
 WDW EM  
 SSB 0  
 LB 0.30 Hz  
 GB 0  
 PC 1.00

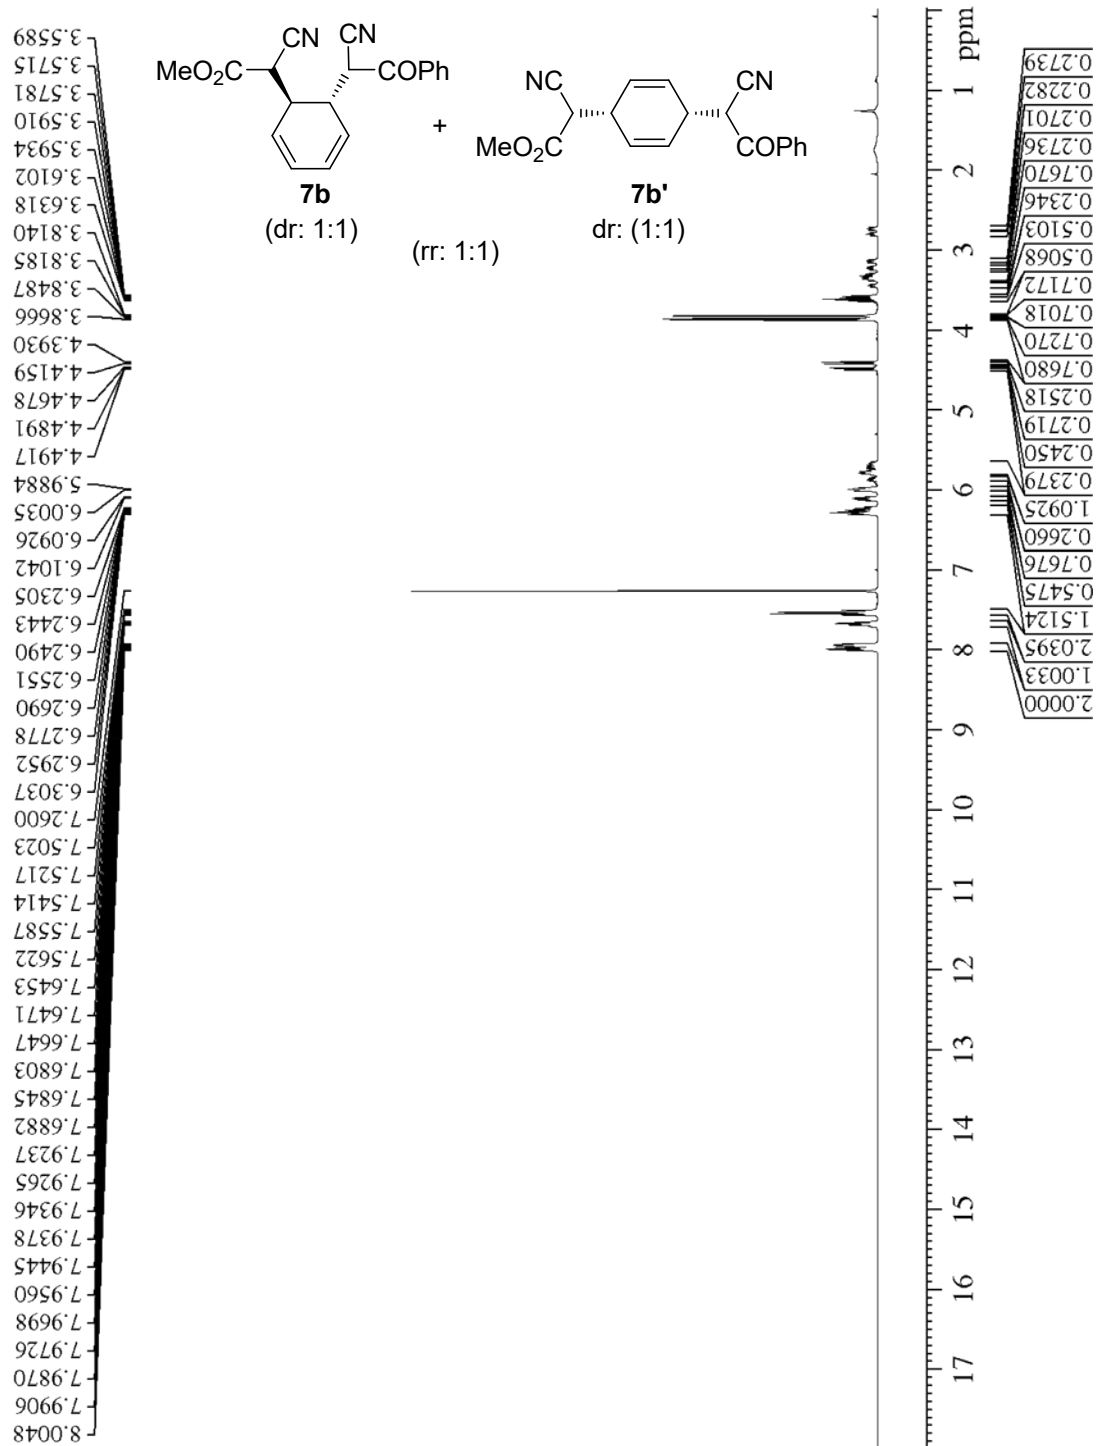

Current Data Parameters  
 NAME zhu-93  
 EXPNO 3  
 PROCNO 1

F2 - Acquisition Parameters  
 Date\_ 20231109  
 Time\_ 22.24  
 INSTRUM spect  
 PROBHD 5 mm QNP 1H/13  
 PULPROG zgpg30  
 TD 65536  
 SOLVENT CDCl3  
 NS 2400  
 DS 0  
 SWH 25252.525 Hz  
 FIDRES 0.385323 Hz  
 AQ 1.2976128 sec  
 RG 2050  
 DW 19.800 usec  
 DE 6.50 usec  
 TE 293.4 K  
 D1 2.00000000 sec  
 d11 0.03000000 sec  
 DELTA 1.89999998 sec  
 TD0 1

==== CHANNEL f1 =====  
 NUC1 13C  
 P1 10.00 usec  
 PL1 6.20 dB  
 SFO1 100.6243395 MHz

==== CHANNEL f2 =====  
 CPDPRG2 waltz16  
 NUC2 1H  
 PCPD2 90.00 usec  
 PL2 -0.40 dB  
 PL12 15.80 dB  
 PL13 18.50 dB  
 SFO2 400.1316005 MHz

F2 - Processing parameters  
 SI 32768  
 SF 100.6127757 MHz  
 WDW EM  
 SSB 0  
 LB 1.00 Hz  
 GB 0  
 PC 1.40

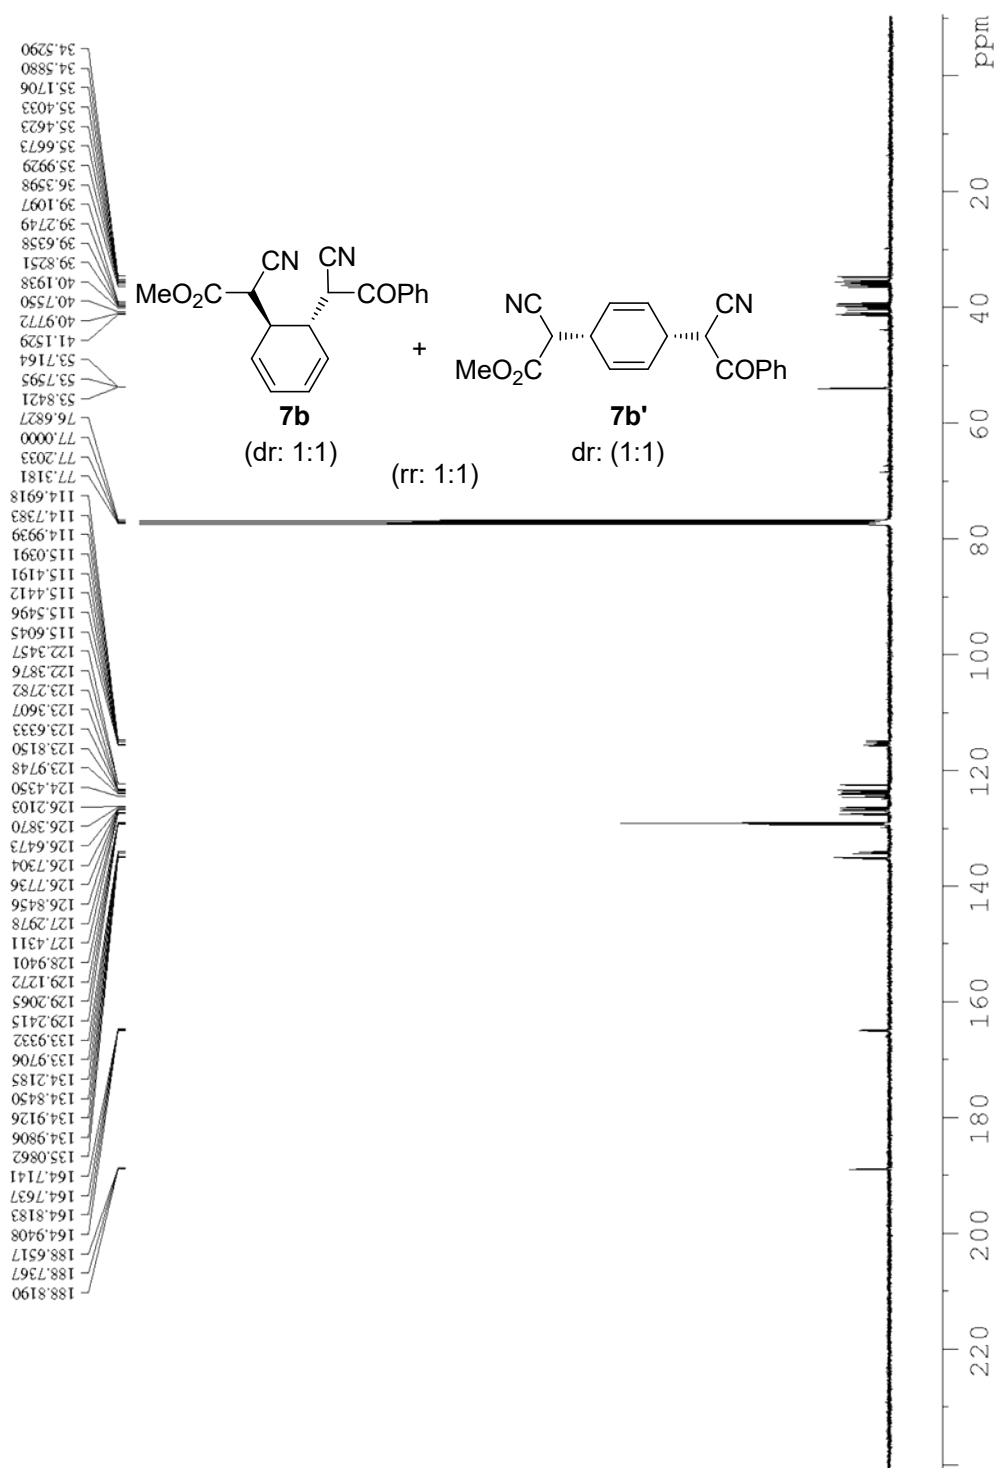



DEPT 90, 135 and  $^{13}\text{C}$ -NMR spectra (100 MHz):

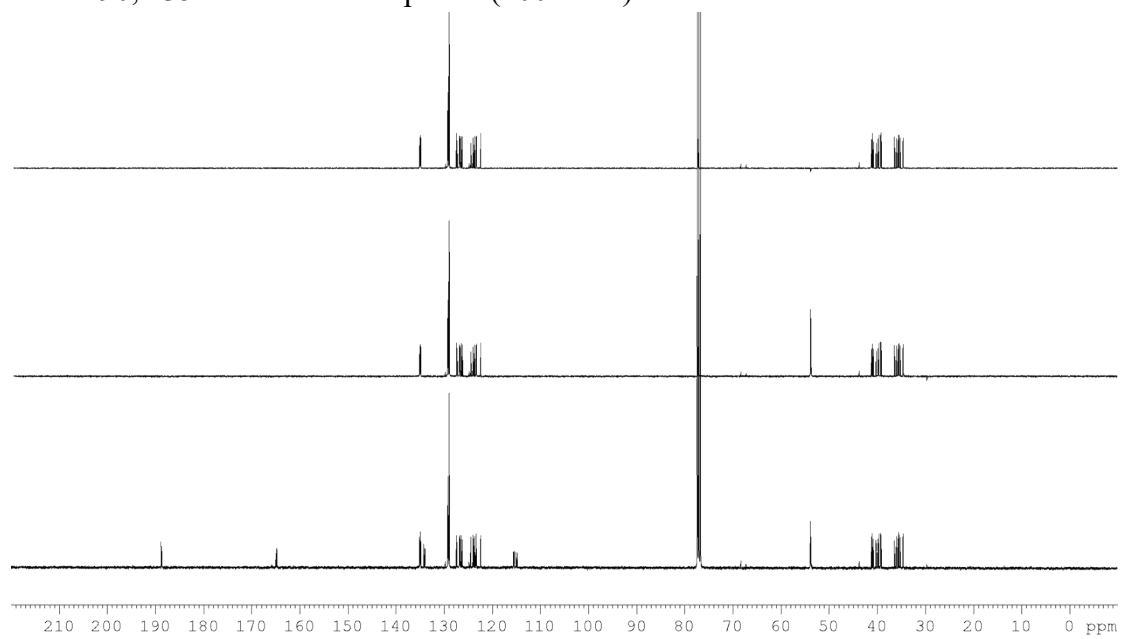

iv) Preparation of **7c/7c'** and <sup>1</sup>H-NMR <sup>13</sup>C-NMR, DEPT spectra

*Trans-tert-Butyl 2-cyano-2-[6-(1-cyano-2-oxo-2-phenylethyl)cyclohexa-2,4-dien-1-yl]acetate* (**7c**) and *Cis-tert-Butyl 2-cyano-2-[4-(1-cyano-2-oxo-2-phenylethyl)cyclohexa-2,5-dien-1-yl]acetate* (**7c'**)

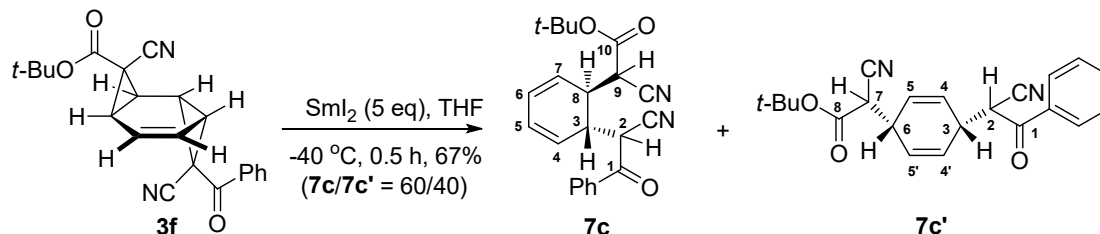

The titled compounds were synthesized from **3f** by following *Procedure A*. After chromatography (silica gel; hexane/ethyl acetate = 10:1, 5:1), a mixture of **7c/7c'** was obtained in 67% yield as a yellow oil (**7c/7c'** = 60/40). (**7c** and **7c'** each includes two diastereomeric pairs deriving from the configurations at C-2/C-9 and C-2/C-7).

IR (neat): 3050, 2981, 2247, 2204, 1738, 1694, 1260, 1151, 692, 672 cm<sup>-1</sup>.

<sup>1</sup>H NMR (400 MHz, CDCl<sub>3</sub>) Phenyl protons of **7c/7c'**: δ 8.01-7.92 (m, 2 H), 7.71-7.64 (m, 1 H), 7.56-7.49 (m, 2 H); Olefinic protons of **7c/7c'**: δ 6.30-6.20 (m, 1.5 H), 6.10-6.05 (m, 0.75 H), 6.04-5.98 (m, 0.5 H), 5.95 (dd, *J* = 9.4, 6.0 Hz, 0.1 H), 5.87 (dd, *J* = 9.3, 6.4 Hz, 0.15 H), 5.82-5.74 (m, 0.5 H), 5.71-5.66 (m, 0.5 H); H-2 of **7c/7c'**: δ 4.52 (d, *J* = 9.1 Hz, 0.15 H, PhCO-CH-CN), 4.49 (d, *J* = 7.9 Hz, 0.1 H, PhCO-CH-CN), 4.41 (d, *J* = 9.9 Hz, 0.15 H, PhCO-CH-CN), 4.40 (d, *J* = 9.6 Hz, 0.10 H, PhCO-CH-CN); H-9 of **7c** and H-7 of **7c'**: δ 3.50 (d, *J* = 8.2 Hz, 0.1 H, EtOCO-CH-CN), 3.44 (d, *J* = 9.9 Hz, 0.1 H, EtOCO-CH-CN), 3.44 (d, *J* = 9.0 Hz, 0.8 H, EtOCO-CH-CN); H-3 and H-8 of **7c**/H-3 and H-6 of **7c'**: δ 3.39-3.32 (m, 0.4 H, from **7c'**), 3.35-3.31 (m, 0.3 H, from **7c**), 3.27 (br t, *J* = 7.5 Hz, 0.2 H, from **7c'**), 3.18 (ddd, *J* = 9.9, 6.0, 1.1 Hz, 0.3 H, from **7c**), 3.12 (dd, *J* = 9.9, 6.0 Hz, 0.3 H, from **7c**), 2.79 (br t, *J* = 7.0 Hz, 0.2 H, from **7c'**), 2.71 (ddd, *J* = 9.0, 6.0, 1.0 Hz, 0.3 H, from **7c**); tert-Butyl protons of **7c/7c'**: δ 1.55 (s, 2.7 H, from **7c**), 1.53 (s, 2.7 H, from **7c**), 1.52 (s, 1.8 H, from **7c'**), 1.49 (s, 1.8 H, from **7c'**) ppm.

<sup>13</sup>C NMR (100 MHz, CDCl<sub>3</sub>): δ 189.0 (PhCO), 188.9 (PhCO), 188.8 (PhCO), 188.7 (PhCO), 163.3 (*t*-BuOCO), 163.2 (*t*-BuOCO), 163.2 (*t*-BuOCO), 163.2 (*t*-BuOCO), 135.0 (CH), 134.9 (CH x 2), 134.8 (CH), 134.4 (C x 2), 134.1 (C), 134.0 (C), 129.3 (CH), 129.2 (CH), 129.1 (CH), 129.0 (CH), 128.9 (CH), 127.2 (CH), 127.0 (CH), 126.8 (CH), 126.8 (CH), 126.6 (CH), 126.6 (CH), 126.4 (CH), 126.3 (CH), 124.6 (CH), 124.1 (CH), 123.8 (CH), 123.8 (CH), 123.7 (CH), 123.0 (CH), 122.9 (CH), 115.8 (CN x 2), 115.6 (CN), 115.5 (CN), 115.4 (CN x 2), 115.2 (CN x 2), 85.1 (C-O), 85.0 (C-O), 84.9 (C-O), 84.8 (C-O), 41.4 (CH), 41.3 (CH), 41.1 (CH), 41.0 (CH), 40.5 (CH), 40.4 (CH), 40.0 (CH), 39.7 (CH), 36.4 (CH), 35.9 (CH), 35.7 (CH), 35.6

(CH), 35.3 (CH), 35.2 (CH), 35.1 (CH), 35.0 (CH), 27.7 (methyl of *t*-Bu), 27.7 (methyl of *t*-Bu x 2), 27.6 (methyl of *t*-Bu) ppm.

HRMS-EI:  $m/z$   $[M]^+$  calcd. for  $C_{22}H_{22}N_2O_3$ : 362.1630; found: 362.1637.

Current Data Parameters  
 NAME zhu-96  
 EXPNO 4  
 PROCNO 1

F2 - Acquisition Parameters  
 Date\_ 20231128  
 Time 21.58  
 INSTRUM spect  
 PROBHD 5 mm QNP 1H/13  
 PULPROG zg30  
 TD 32768  
 SOLVENT CDCl3  
 NS 60  
 DS 0  
 SWH 7211.539 Hz  
 FIDRES 0.220079 Hz  
 AQ 2.2719147 sec  
 RG 287  
 DW 69.333 usec  
 DE 6.50 usec  
 TE 293.8 K  
 D1 2.00000000 sec  
 TD0 1

==== CHANNEL f1 =====  
 NUC1 1H  
 P1 15.00 usec  
 PL1 0.90 dB  
 SFO1 400.1336012 MHz

F2 - Processing parameters  
 SI 16384  
 SF 400.1300092 MHz  
 WDW EM  
 SSB 0  
 LB 0.30 Hz  
 GB 0  
 PC 1.00

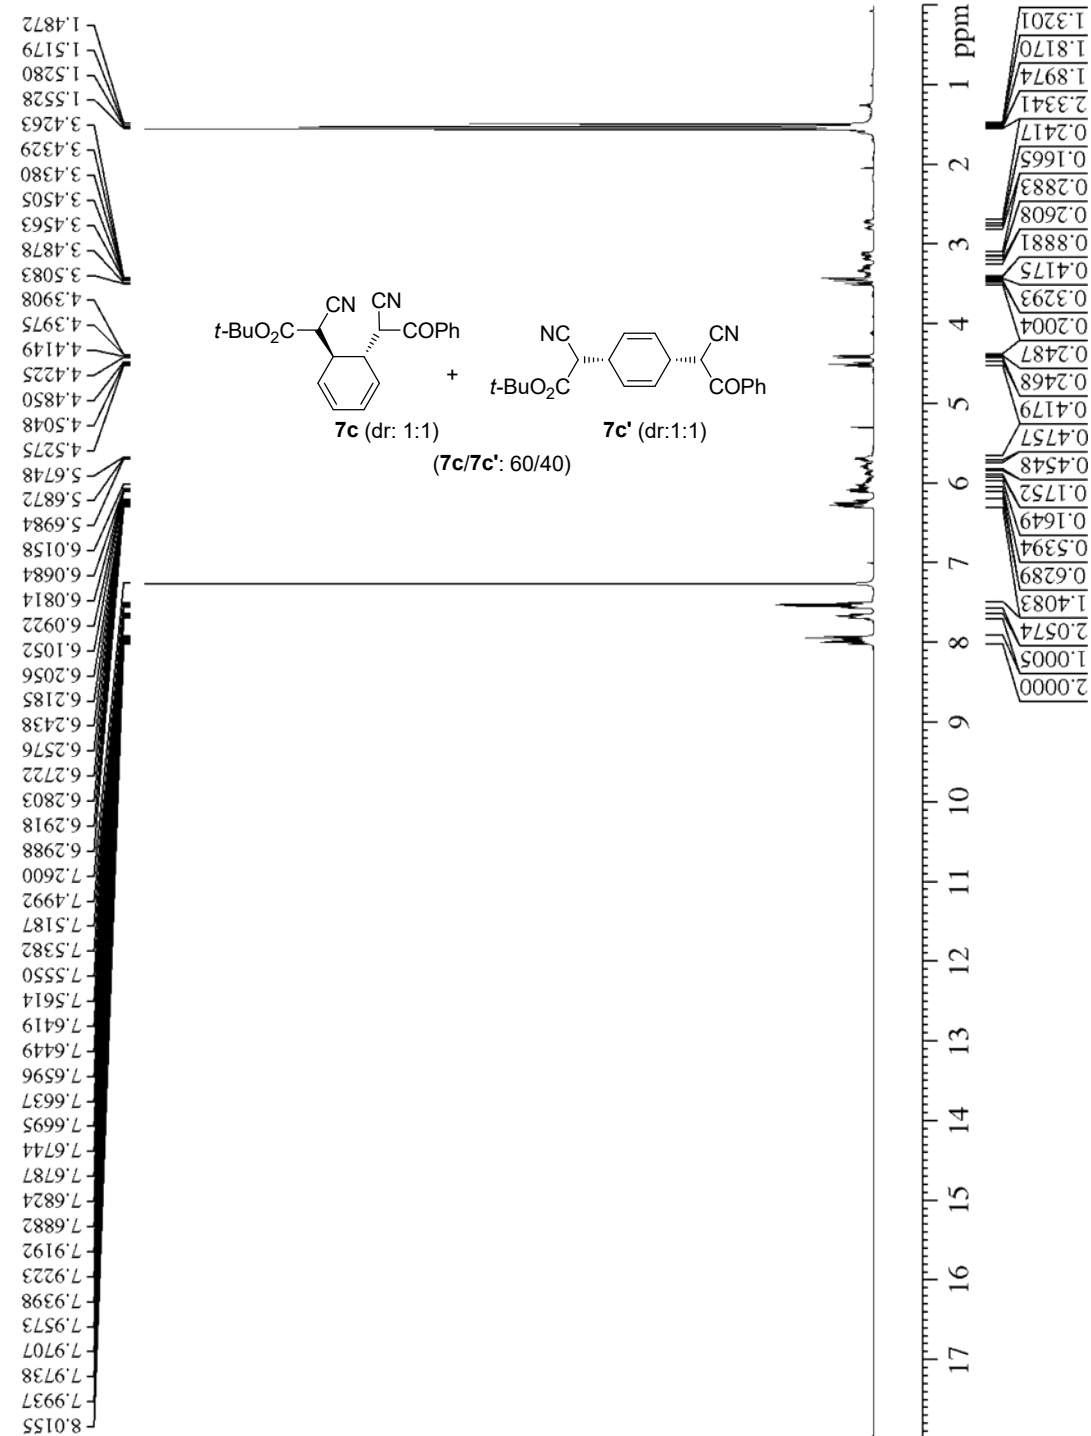

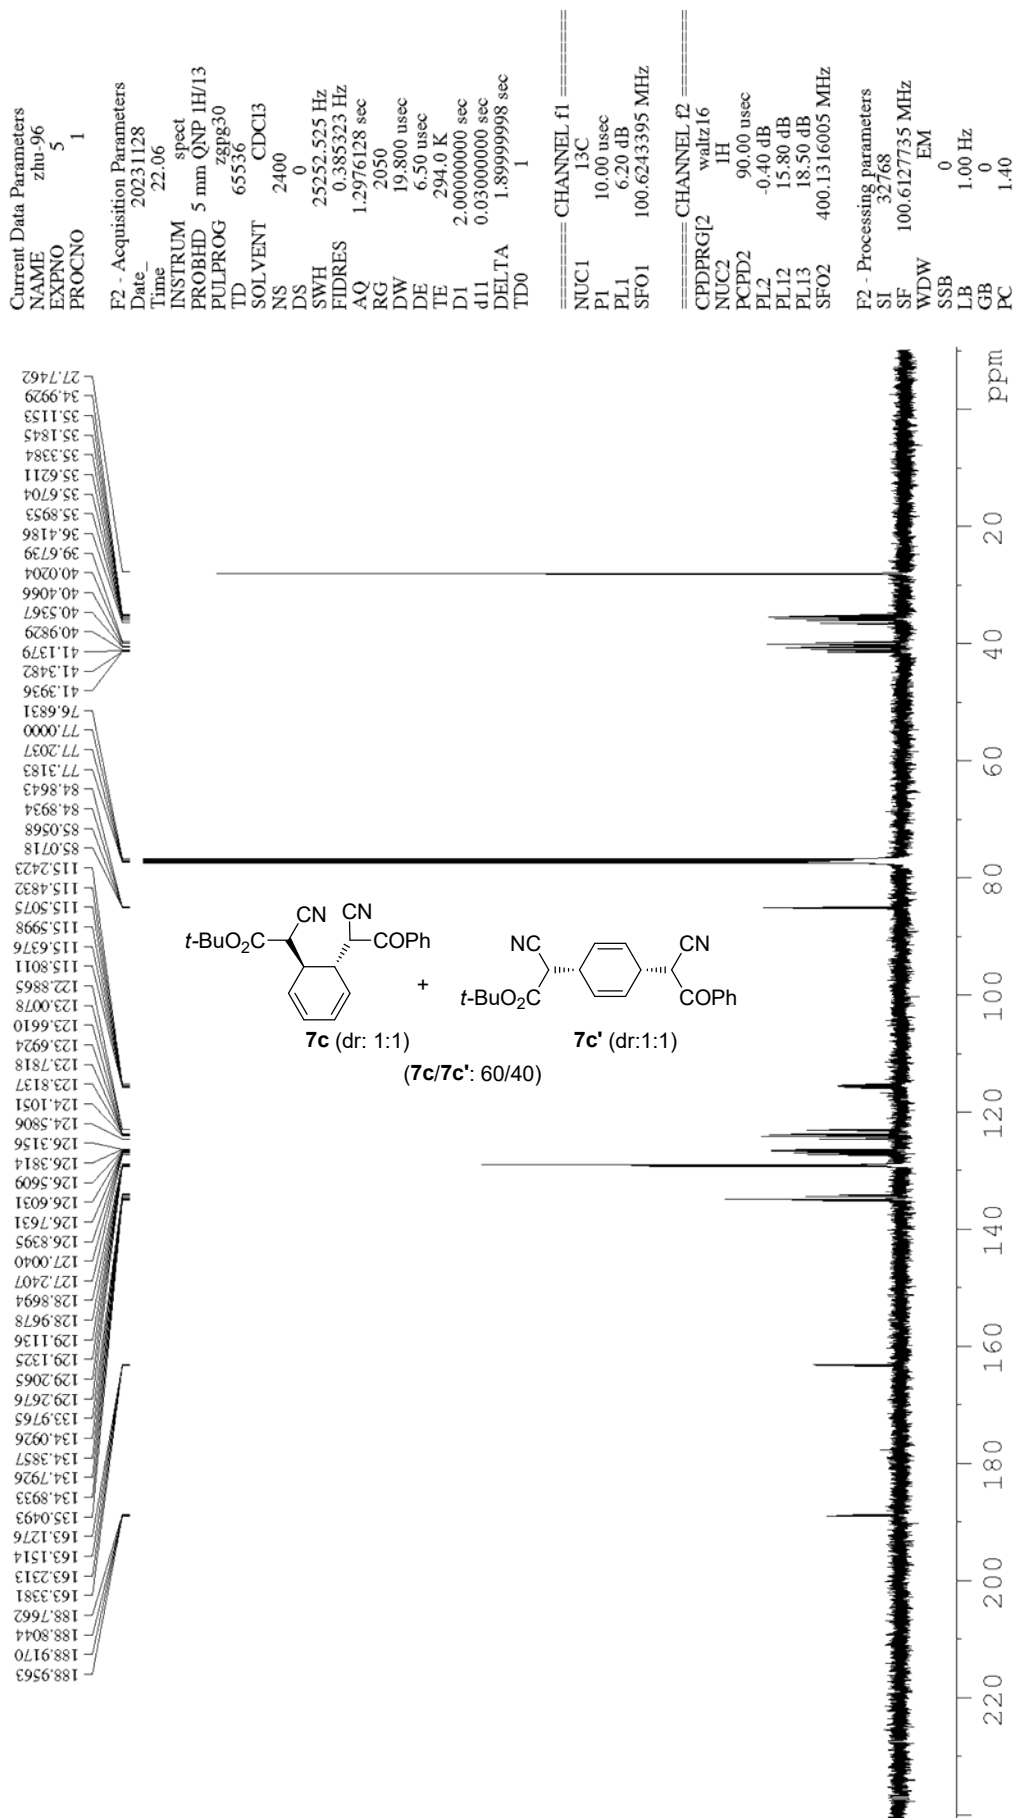

DEPT 90, 135 and  $^{13}\text{C}$ -NMR spectra (100 MHz):

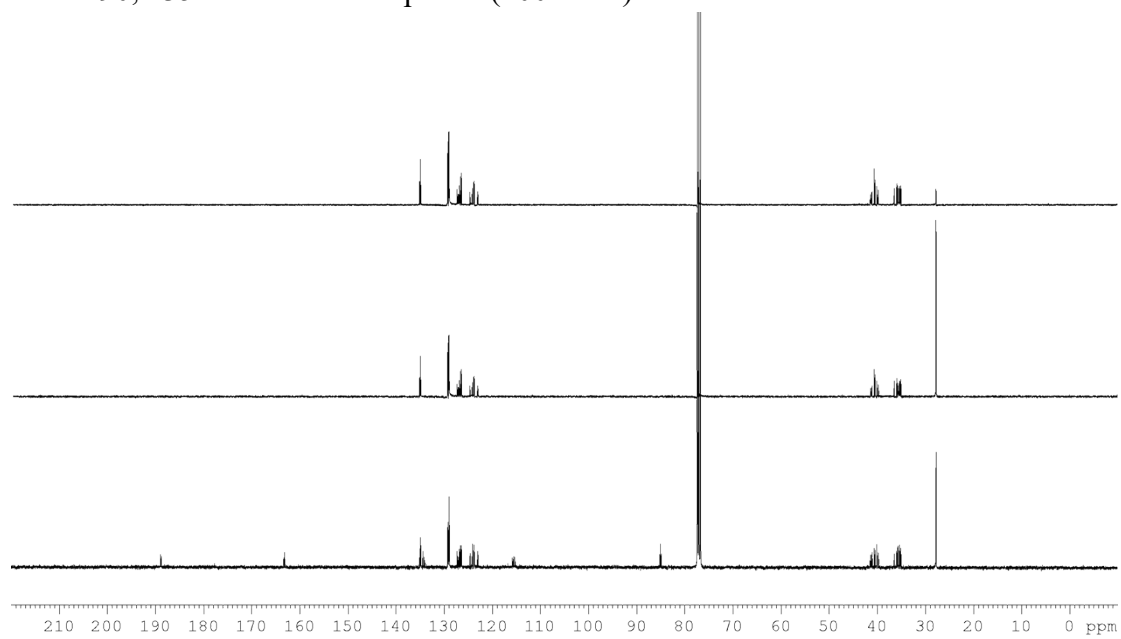

**v) Preparation of 7d/7d' and <sup>1</sup>H-NMR <sup>13</sup>C-NMR, DEPT spectra**

*Trans*-Ethyl 2-cyano-2-[6-(1-cyano-2-oxopropyl)cyclohexa-2,4-dien-1-yl]acetate (**7d**) and *Cis*-Ethyl 2-cyano-2-[6-(1-cyano-2-oxopropyl)cyclohexa-2,4-dien-1-yl]acetate (**7d'**)

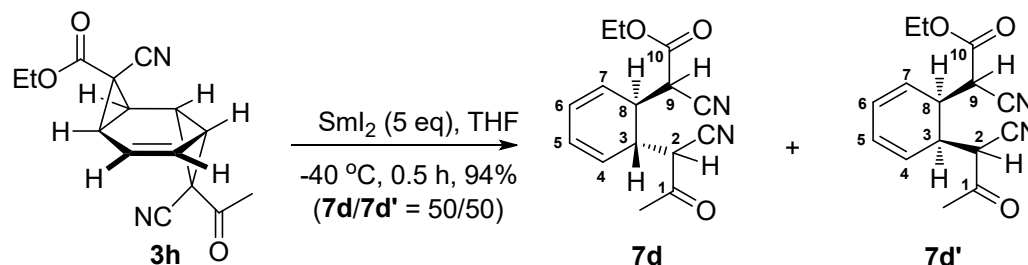

The titled compounds were synthesized from **3h** by following *Procedure A*. After chromatography (silica gel; hexane/ethyl acetate = 5:1, 2:1), a mixture of **7d/7d'** was obtained in 94% yield as a colorless oil (**7d/7d'**: 50/50). (**7d** and **7d'** each includes two diastereomeric pairs deriving from the configurations at C-2/C-9).

IR (neat): 3055, 2986, 2248, 2204, 1741, 1266, 737, 704  $\text{cm}^{-1}$ .

<sup>1</sup>H NMR (400 MHz,  $\text{CDCl}_3$ ) Olefinic protons of **7d/7d'**:  $\delta$  6.26-6.14 (m, 2 H), 5.92-5.69 (m, 2 H); Methylene protons of EtO:  $\delta$  4.34-4.24 (m, 2 H); H-2/H-9 of **7d/7d'**:  $\delta$  3.54-3.49 (m, 2 H); H-3 and H-8 of **7c** and **7c'**:  $\delta$  3.18 (br t,  $J = 6.44$  Hz, 0.25 H), 3.16-3.06 (m, 0.75 H), 2.99 (br t,  $J = 6.6$  Hz, 0.25 H), 2.93 (br t,  $J = 6.5$  Hz, 0.25 H), 2.82 (br t,  $J = 6.9$  Hz, 0.5 H); MeCO of **7d/7d'**:  $\delta$  2.43 (s, 0.75 H), 2.41 (s, 0.75 H), 2.40 (s, 0.75 H), 2.39 (s, 0.75 H); Methyl protons of EtO:  $\delta$  1.34 (t,  $J = 7.1$  Hz, 1.5 H), 1.32 (t,  $J = 7.2$  Hz, 1.5 H) ppm.

<sup>13</sup>C NMR (100 MHz,  $\text{CDCl}_3$ ):  $\delta$  197.1 (MeCO), 197.0 (MeCO), 196.7 (MeCO), 196.6 (MeCO), 164.4 (EtOCO), 164.3 (EtOCO), 164.3 (EtOCO), 164.2 (EtOCO), 127.2 (CH), 127.0 (CH), 126.9 (CH), 126.8 (CH), 126.7 (CH), 126.6 (CH), 126.4 (CH), 126.3 (CH), 123.8 (CH), 123.4 (CH), 123.2 (CH), 123.1 (CH), 123.0 (CH), 122.8 (CH), 122.6 (CH), 122.5 (CH), 115.9 (CN), 115.8 (CN), 115.5 (CN), 115.4 (CN), 115.1 (CN), 114.9 (CN), 114.8 (CN x 2), 63.4 ( $\text{CH}_3\text{CH}_2\text{O}$ ), 63.4 ( $\text{CH}_3\text{CH}_2\text{O}$ ), 63.3 ( $\text{CH}_3\text{CH}_2\text{O}$ ), 63.2 ( $\text{CH}_3\text{CH}_2\text{O}$ ), 47.0 (CH), 46.8 (CH), 46.7 (CH), 46.0 (CH), 40.2 (CH x 2), 39.5 (CH), 39.2 (CH), 36.0 (CH), 35.7 (CH x 2), 35.5 (CH), 34.6 (CH), 34.4 (CH), 34.2 (CH), 34.1 (CH), 29.5 ( $\text{CH}_3\text{CO}$ ), 29.4 ( $\text{CH}_3\text{CO}$ ), 28.5 ( $\text{CH}_3\text{CO}$ ), 28.4 ( $\text{CH}_3\text{CO}$ ), 13.9 ( $\text{CH}_3\text{CH}_2\text{O}$  x 4) ppm.

HRMS-EI:  $m/z$   $[\text{M}]^+$  calcd. for  $\text{C}_{15}\text{H}_{16}\text{N}_2\text{O}_3$ : 272.1161; found: 272.1164.

Current Data Parameters  
 NAME zhu-91  
 EXPNO 1  
 PROCNO 1

F2 - Acquisition Parameters  
 Date\_ 20231022  
 Time 12.30  
 INSTRUM spect  
 PROBHD 5 mm QNP 1H/13  
 PULPROG zg30  
 TD 32768  
 SOLVENT CDCl3  
 NS 40  
 DS 0  
 SWH 7211.539 Hz  
 FIDRES 0.220079 Hz  
 AQ 2.2719147 sec  
 RG 256  
 DW 69.333 usec  
 DE 6.50 usec  
 TE 293.2 K  
 D1 2.00000000 sec  
 TD0 1

==== CHANNEL f1 =====  
 NUC1 1H  
 P1 15.00 usec  
 PL1 0.90 dB  
 SFO1 400.1336012 MHz  
 F2 - Processing parameters  
 SI 16384  
 SF 400.1300092 MHz  
 WDW EM  
 SSB 0  
 LB 0.30 Hz  
 GB 0  
 PC 1.00

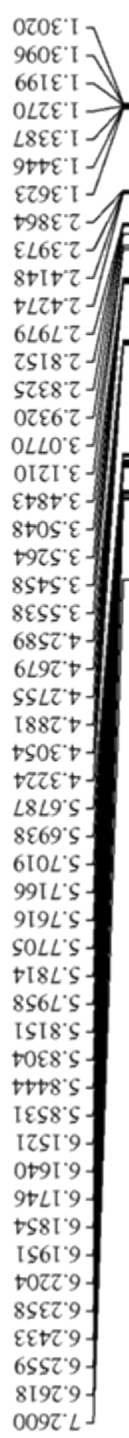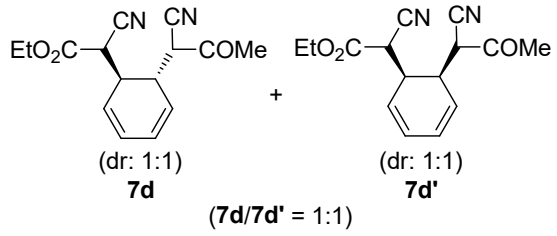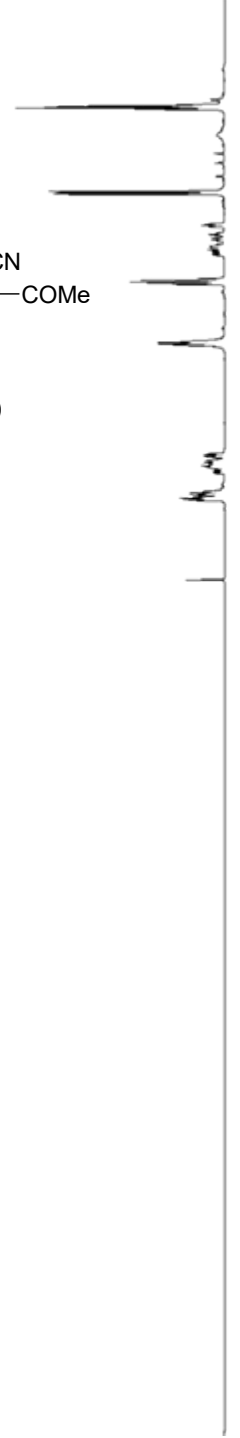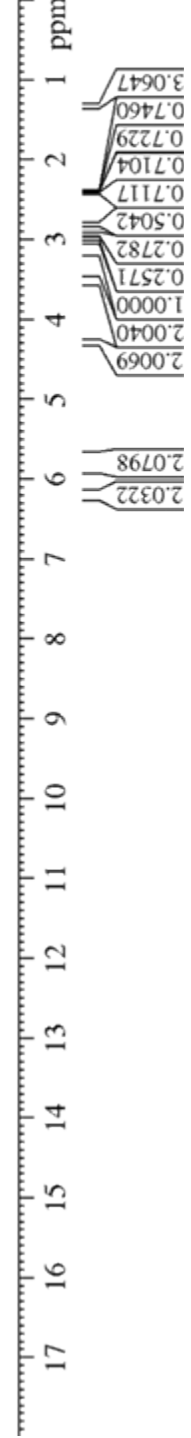



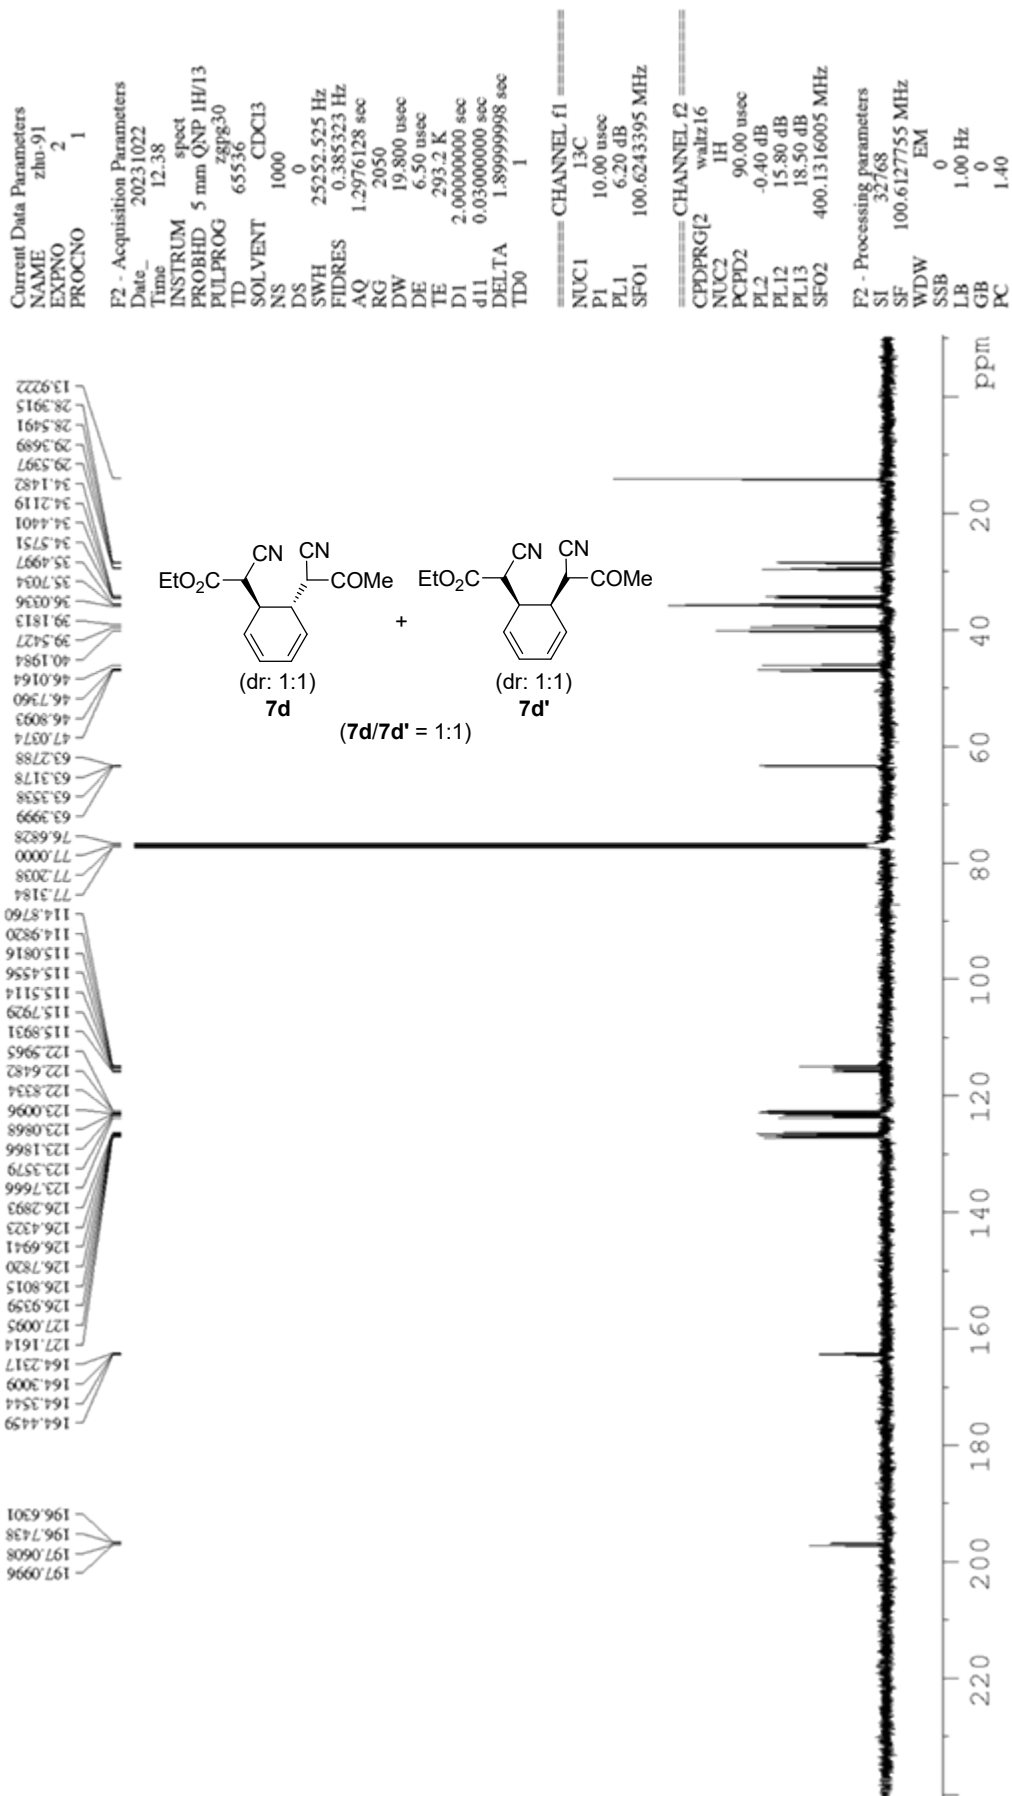

DEPT 90, 135 and  $^{13}\text{C}$ -NMR spectra (100 MHz):

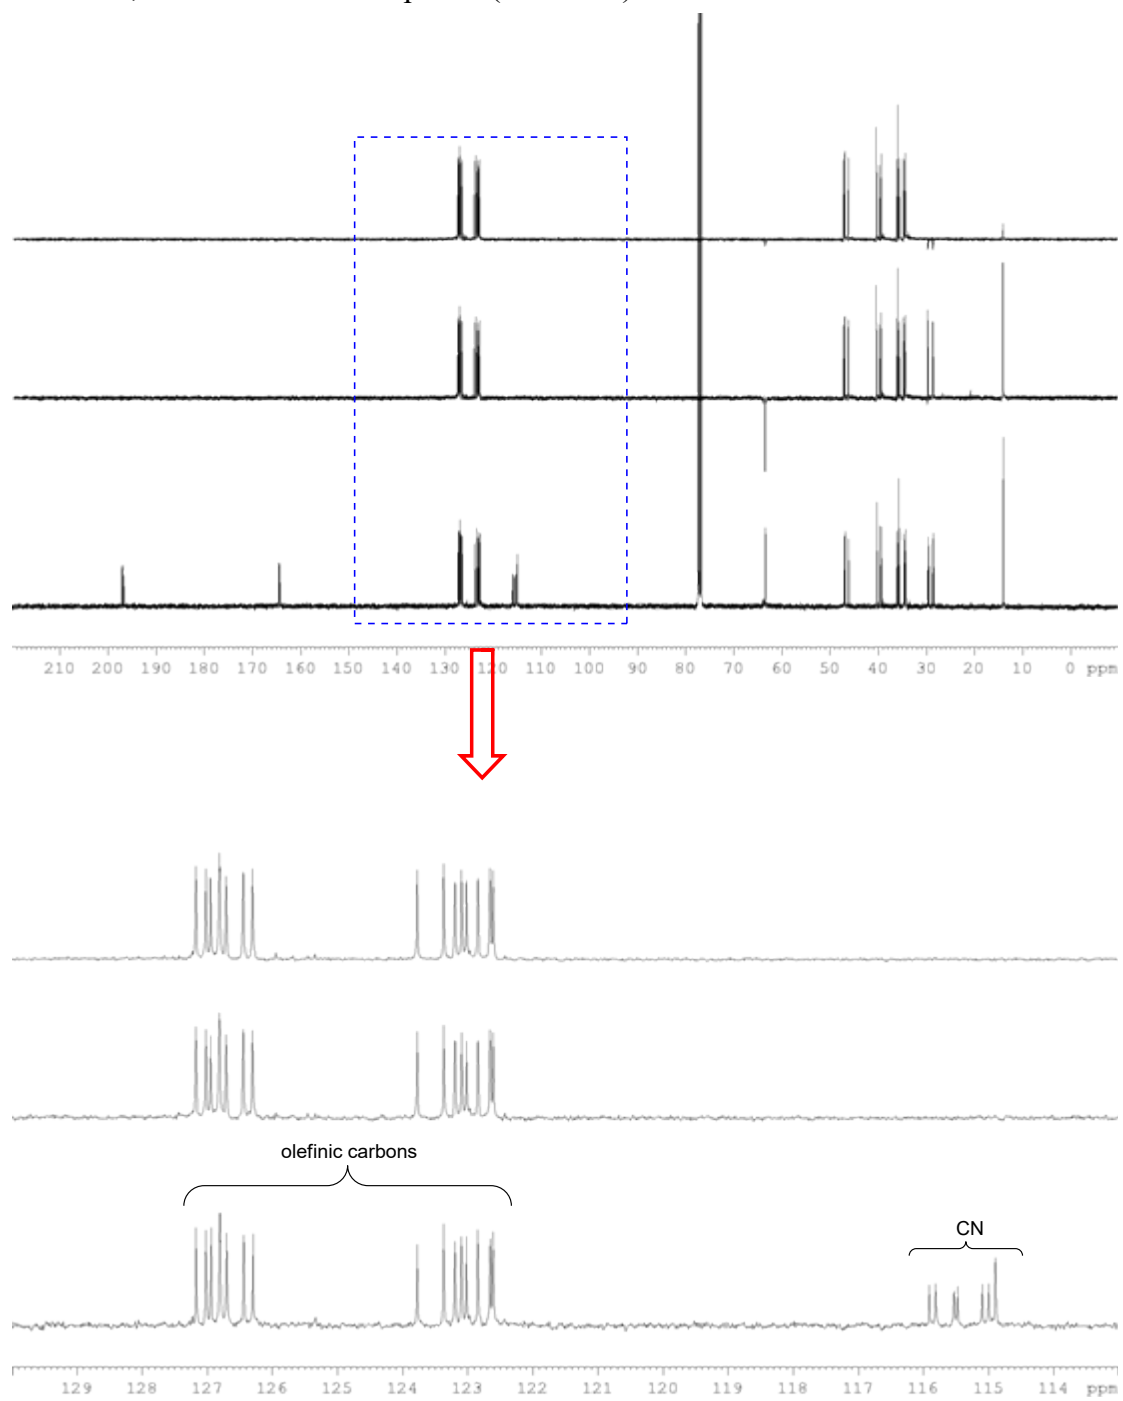

### vi) Preparation of **7e/7e'** and <sup>1</sup>H-NMR <sup>13</sup>C-NMR, DEPT spectra

*Trans*-Methyl 2-cyano-2-[6-(1-cyano-2-oxopropyl)cyclohexa-2,4-dien-1-yl]acetate (**7e**) and *Cis*-Methyl 2-cyano-2-[6-(1-cyano-2-oxopropyl)cyclohexa-2,4-dien-1-yl]acetate (**7e'**)

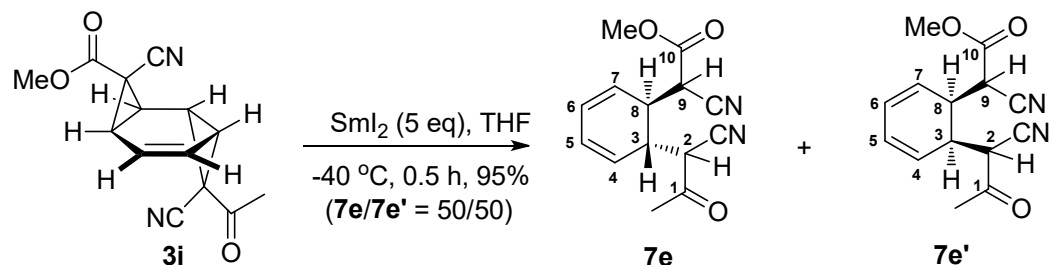

The titled compounds were synthesized from **3i** by following *Procedure A*. After chromatography (silica gel; hexane/ethyl acetate = 10:1, 5:1, 2:1), a mixture of **7e/7e'** was obtained in 95% yield as a colorless oil (**7e/7e'**: 50/50). (**7e** and **7e'** each includes two diastereomeric pairs deriving from the configurations at C-2/C-9).

IR (neat): 3046, 2957, 2247, 2202, 1745, 1651, 1260, 743, 713  $\text{cm}^{-1}$ .

<sup>1</sup>H NMR (400 MHz,  $\text{CDCl}_3$ ) Olefinic protons of **7e/7e'**:  $\delta$  6.35-6.15 (m, 2 H), 5.89-5.67 (m, 2 H); MeO:  $\delta$  3.85 (s, 1.5 H), 3.83 (s, 0.75 H), 3.82 (s, 0.75 H); H-2/H-9 of **7e/7e'**:  $\delta$  3.58-3.49 (m, 2 H); H-3 and H-8 of **7e** and **7e'**:  $\delta$  3.18-3.04 (m, 1 H), 2.99 (br t,  $J = 6.5$  Hz, 0.25 H), 2.94 (br t,  $J = 6.5$  Hz, 0.25 H), 2.81 (br t,  $J = 6.5$  Hz, 0.5 H); MeC=O:  $\delta$  2.42 (s, 0.75 H), 2.41 (s, 0.75 H), 2.39 (s, 0.75 H), 2.38 (s, 0.75 H) ppm.

<sup>13</sup>C NMR (100 MHz,  $\text{CDCl}_3$ ):  $\delta$  197.1 (MeCO), 197.0 (MeCO), 196.8 (MeCO), 196.6 (MeCO), 164.9 (MeOCO), 164.8 (MeOCO), 164.8 (MeOCO), 164.7 (MeOCO), 127.2 (CH), 127.0 (CH), 126.9 (CH), 126.8 (CH), 126.7 (CH x 2), 126.4 (CH), 126.2 (CH), 123.7 (CH), 123.3 (CH), 123.0 (CH), 123.0 (CH), 122.9 (CH), 122.8 (CH), 122.5 (CH), 122.4 (CH), 115.8 (CN), 115.7 (CN), 115.5 (CN), 115.4 (CN), 114.9 (CN), 114.8 (CN), 114.7 (CN x 2), 53.8 ( $\text{CH}_3\text{O}$ ), 53.8 ( $\text{CH}_3\text{O}$ ), 53.8 ( $\text{CH}_3\text{O}$ ), 53.7 ( $\text{CH}_3\text{O}$ ), 47.0 (CH), 46.9 (CH), 46.6 (CH), 46.0 (CH), 40.1 (CH), 40.0 (CH), 39.5 (CH), 39.1 (CH), 36.0 (CH), 35.7 (CH), 35.7 (CH), 35.5 (CH), 34.5 (CH), 34.4 (CH), 34.1 (CH), 34.0 (CH), 29.5 ( $\text{CH}_3\text{CO}$ ), 29.4 ( $\text{CH}_3\text{CO}$ ), 28.5 ( $\text{CH}_3\text{CO}$ ), 28.4 ( $\text{CH}_3\text{CO}$ ) ppm.

HRMS-EI:  $m/z$   $[\text{M}]^+$  calcd. for  $\text{C}_{14}\text{H}_{14}\text{N}_2\text{O}_3$ : 258.1004; found: 258.0984.

Current Data Parameters  
 NAME zhu-100-TLC  
 EXPNO 3  
 PROCNO 1

F2 - Acquisition Parameters  
 Date\_ 20231231  
 Time 22.01  
 INSTRUM spect  
 PROBHD 5 mm QNP 1H/13  
 PULPROG zg30  
 TD 32768  
 SOLVENT CDCl3  
 NS 100  
 DS 0  
 SWH 7211.539 Hz  
 FIDRES 0.220079 Hz  
 AQ 2.2719147 sec  
 RG 181  
 DW 69.333 usec  
 DE 6.50 usec  
 TE 673.2 K  
 D1 2.00000000 sec  
 TD0 1

==== CHANNEL f1 =====  
 NUC1 1H  
 P1 15.00 usec  
 PL1 0.90 dB  
 SFO1 400.1336012 MHz

F2 - Processing parameters  
 SI 16384  
 SF 400.1300091 MHz  
 WDW EM  
 SSB 0  
 LB 0.30 Hz  
 GB 0  
 PC 1.00

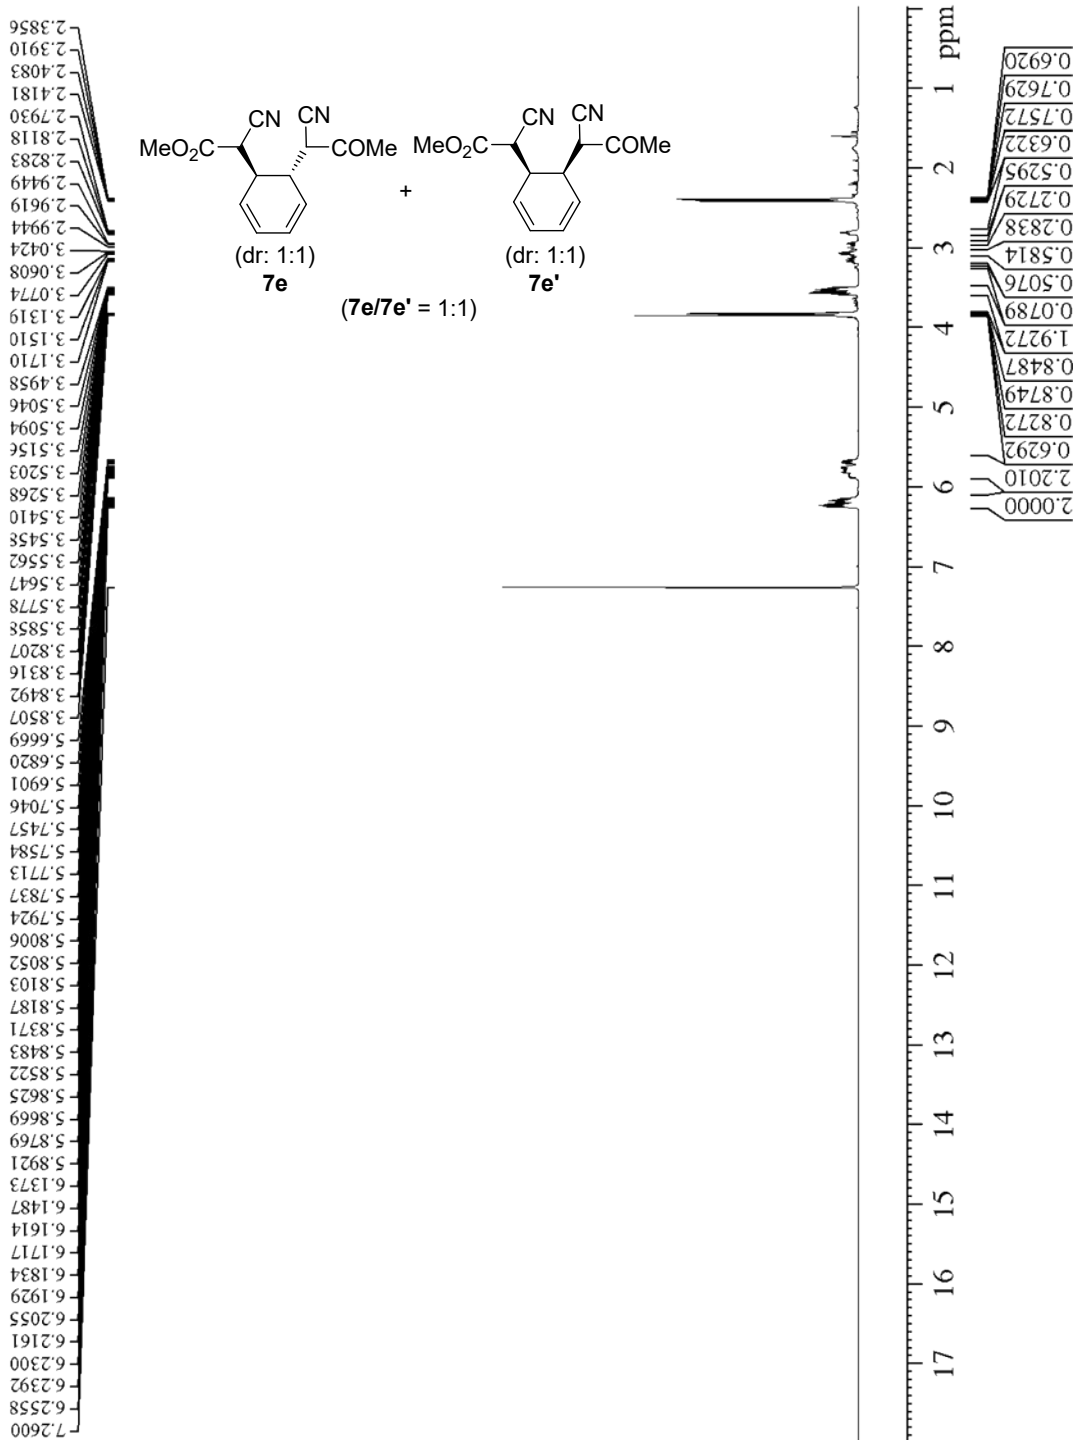

```

Current Data Parameters
NAME      zhu-100-TLC
EXPNO    2
PROCNO   1

F2 - Acquisition Parameters
Date_    20231231
Time     15:52
INSTRUM  spect
PROBHD   5 mm QNP 1H/13
PULPROG  zgpg30
TD       65536
SOLVENT  CDCl3
NS       1000
DS       0
SWH      25252.525 Hz
FIDRES   0.385323 Hz
AQ       1.2976128 sec
RG       2050
DW       19.800 usec
DE       6.50 usec
TE       673.2 K
D1       2.0000000 sec
d11      0.03000000 sec
DELTA    1.89999998 sec
TD0      1

===== CHANNEL f1 =====
NUC1     13C
P1       10.00 usec
PL1      6.20 dB
SFO1    100.6243395 MHz

===== CHANNEL f2 =====
CPDPRG2  waltz16
NUC2     1H
PCPD2    90.00 usec
PL2      -0.40 dB
PL12     15.80 dB
PL13     18.50 dB
SFO2    400.1316005 MHz

F2 - Processing parameters
SI       32768
SF       100.6127784 MHz
WDW      EM
SSB      0
LB       1.00 Hz
GB       0
PC       1.40

```

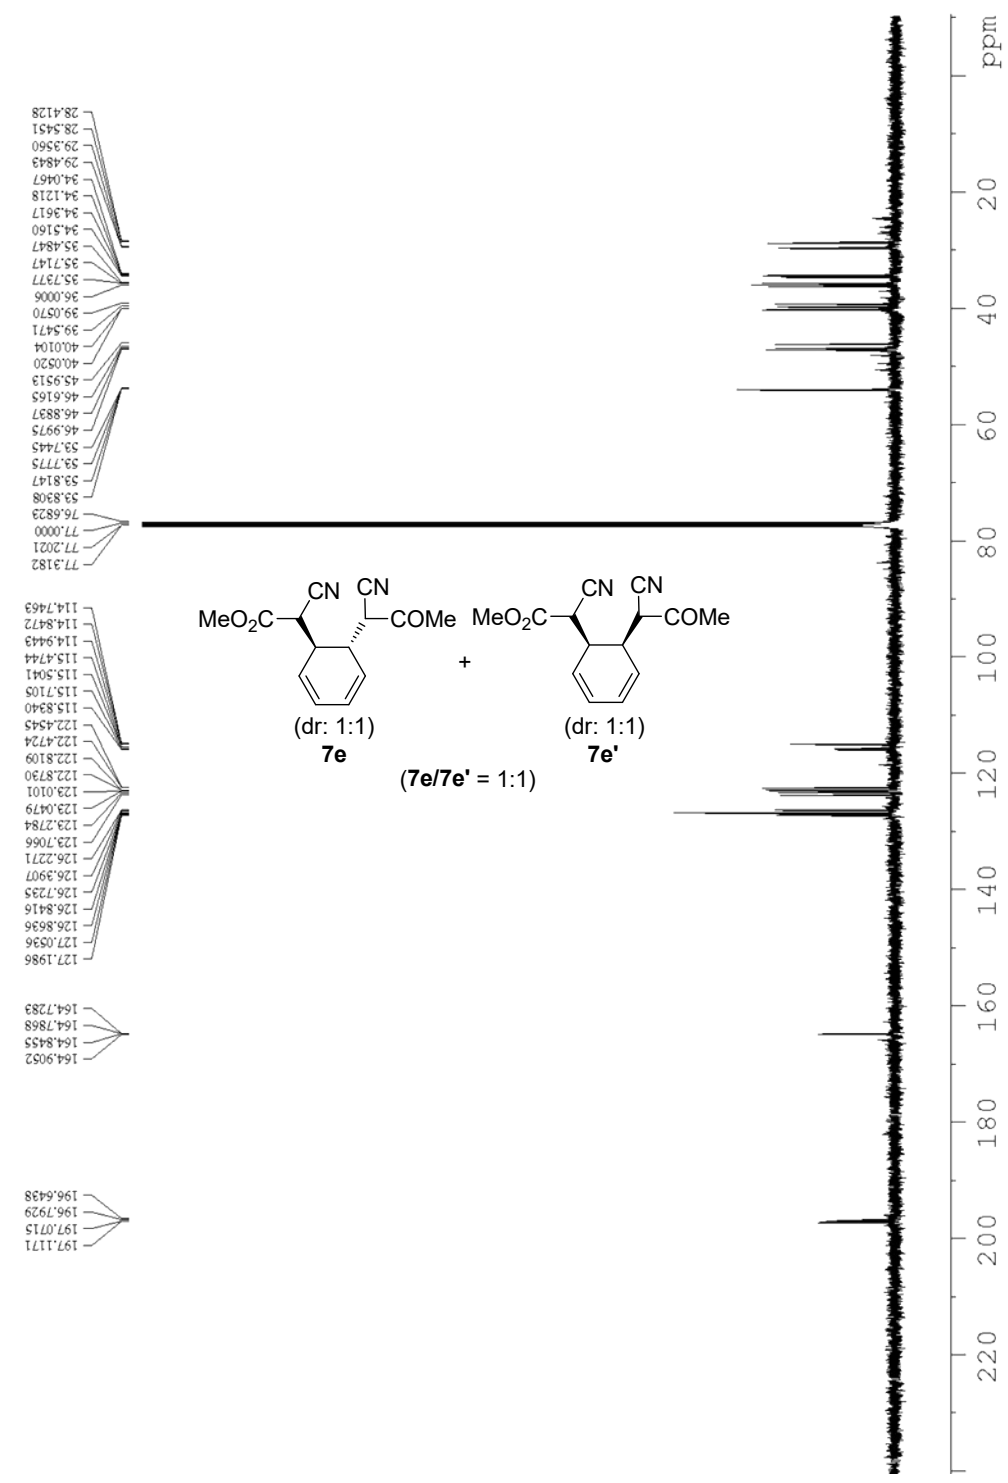

DEPT 90, 135 and  $^{13}\text{C}$ -NMR spectra (100 MHz):

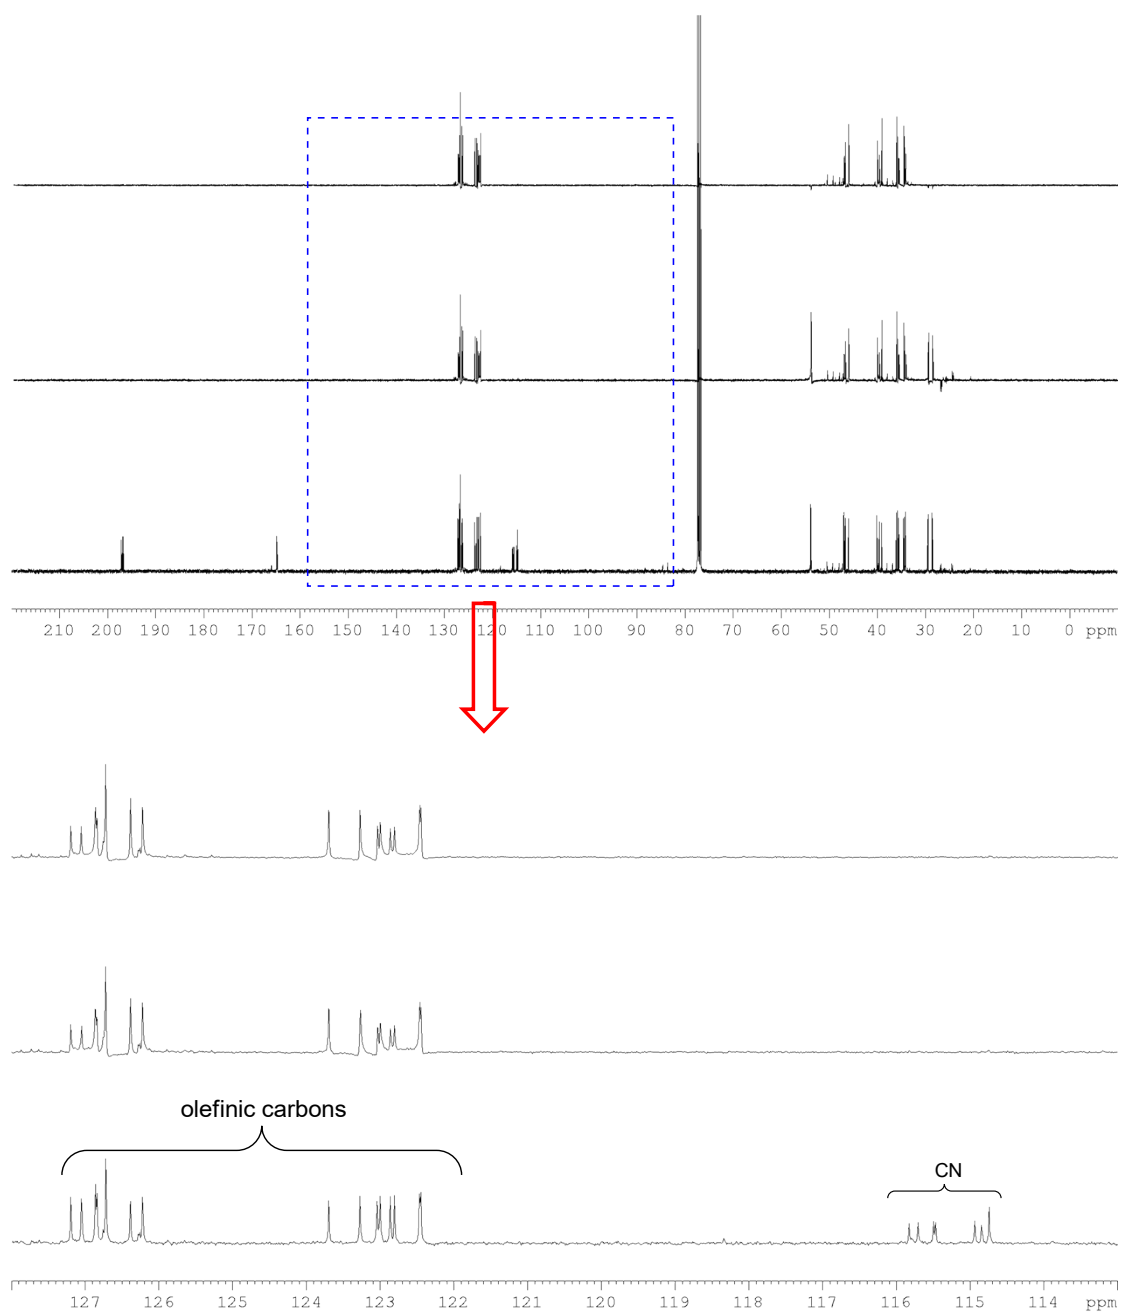

vii) Preparation of **7f/7f'** and <sup>1</sup>H-NMR <sup>13</sup>C-NMR, DEPT spectra

*Trans-tert-Butyl 2-cyano-2-[6-(1-cyano-2-oxopropyl)cyclohexa-2,4-dien-1-yl]acetate* (**7f**) and *Cis-tert-Butyl 2-cyano-2-[6-(1-cyano-2-oxopropyl)cyclohexa-2,4-dien-1-yl]acetate* (**7f'**)

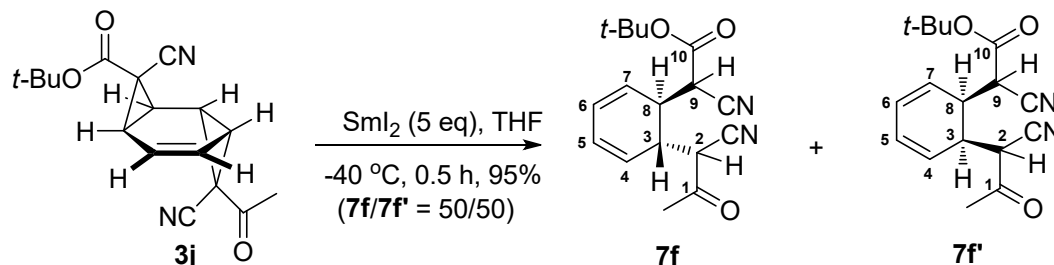

The titled compounds were synthesized from **3j** by following *Procedure A*. After chromatography (silica gel; hexane/ethyl acetate = 10:1, 3:1), a mixture of **7f/7f'** was obtained in 95% yield as a colorless oil (**7f/7f'**: 50/50). (**7f** and **7f'** each includes two diastereomeric pairs deriving from the configurations at C-2/C-9).

IR (neat): 3047, 2982, 2248, 2203, 1737, 1732, 1152, 743, 712 cm<sup>-1</sup>.

<sup>1</sup>H NMR (400 MHz, CDCl<sub>3</sub>) Olefinic protons of **7f/7f'**: δ 6.25-6.14 (m, 2 H), 5.92 (dd, *J* = 9.4, 6.1 Hz, 0.5 H), 5.86-5.75 (m, 1 H), 5.70 (dd, *J* = 9.4, 6.0 Hz, 0.5 H); H-2/H-9 of **7f/7f'**: δ 3.52 (d, *J* = 8.9 Hz, 0.5 H), 3.51-3.43 (m, 1 H), 3.40 (d, *J* = 8.9 Hz, 0.5 H); H-3 and H-8 of **7f/7f'**: δ 3.15 (br t, *J* = 6.6 Hz, 0.25 H), 3.13-3.01 (m, 0.75 H), 2.97 (br t, *J* = 6.2 Hz, 0.25 H), 2.89 (br t, *J* = 6.3 Hz, 0.25 H), 2.82-2.76 (m, 0.5 H); MeC=O: δ 2.43 (s, 0.75 H), 2.41 (s, 0.75 H), 2.39 (s, 0.75 H), 2.38 (s, 0.75 H); Methyl of *t*-Bu: δ 1.53 (s, 2.25 H), 1.52 (s, 2.25 H), 1.50 (s, 2.25 H), 1.49 (s, 2.25 H) ppm.

<sup>13</sup>C NMR (100 MHz, CDCl<sub>3</sub>): δ 197.1 (MeCO), 197.0 (MeCO), 196.7 (MeCO), 196.6 (MeCO), 163.4 (*t*-BuOCO), 163.2 (*t*-BuOCO), 163.2 (*t*-BuOCO), 163.1 (*t*-BuOCO), 127.0 (CH x 2), 126.8 (CH), 126.7 (CH), 126.6 (CH), 126.5 (CH), 126.4 (CH), 126.3 (CH), 123.8 (CH), 123.5 (CH), 123.4 (CH x 2), 123.0 (CH), 122.9 (CH), 122.9 (CH), 122.8 (CH), 116.0 (CN), 115.9 (CN), 115.5 (CN), 115.5 (CN), 115.4 (CN), 115.3 (CN), 115.3 (CN), 115.2 (CN), 85.1 (C-O), 85.0 (C-O), 84.9 (C-O), 84.8 (C-O), 47.1 (CH), 47.0 (CH), 46.6 (CH), 46.1 (CH), 41.2 (CH), 41.1 (CH), 40.3 (CH), 40.2 (CH), 36.1 (CH), 35.7 (CH), 35.6 (CH), 35.5 (CH), 34.7 (CH), 34.6 (CH), 34.4 (CH), 34.3 (CH), 29.6 (CH<sub>3</sub>CO), 29.4 (CH<sub>3</sub>CO), 28.6 (CH<sub>3</sub>CO), 28.3 (CH<sub>3</sub>CO), 27.7 (methyl of *t*-Bu), 27.6 (methyl of *t*-Bu x 3) ppm

HRMS-EI: *m/z* [M]<sup>+</sup> calcd. for C<sub>17</sub>H<sub>20</sub>N<sub>2</sub>O<sub>3</sub>: 300.1474; found: 300.1464.

Current Data Parameters  
 NAME zhu-104  
 EXPNO 3  
 PROCNO 1

F2 - Acquisition Parameters  
 Date\_ 20240203  
 Time 22:06  
 INSTRUM spect  
 PROBHD 5 mm QNP 1H/13  
 PULPROG zg30  
 TD 32768  
 SOLVENT CDCl3  
 NS 32  
 DS 0  
 SWH 7211.539 Hz  
 FIDRES 0.220079 Hz  
 AQ 2.2719147 sec  
 RG 203  
 DW 69.333 usec  
 DE 6.50 usec  
 TE 293.2 K  
 D1 2.0000000 sec  
 TD0 1

==== CHANNEL f1 =====  
 NUC1 1H  
 P1 15.00 usec  
 PL1 0.90 dB  
 SFO1 400.1336012 MHz

F2 - Processing parameters  
 SI 16384  
 SF 400.1300092 MHz  
 WDW EM  
 SSB 0  
 LB 0.30 Hz  
 GB 0  
 PC 1.00

7.2600  
6.2503  
6.2422  
6.2279  
6.2229  
6.2071  
6.1839  
6.1667  
6.1491  
6.1373  
5.9407  
5.9263  
5.9177  
5.9025  
5.8486  
5.8342  
5.8255  
5.8108  
5.7880  
5.7691  
5.7517  
5.7223  
5.7077  
5.6990  
5.6841  
3.5345  
3.5166  
3.5122  
3.4971  
3.4828  
3.4637  
3.4526  
3.4454  
3.4319  
3.4210  
3.3987  
3.1577  
3.0989  
3.0746  
3.0564  
3.0375  
2.9837  
2.9676  
2.9051  
2.8894  
2.8681  
2.8154  
2.7974  
2.7804  
2.4264  
2.4131  
2.3906  
2.3736  
1.5255  
1.5156  
1.5042  
1.4918

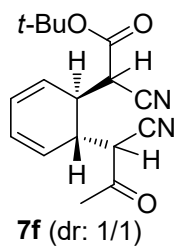

+  
 (7f/7f': 1/1)

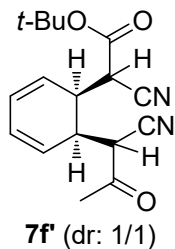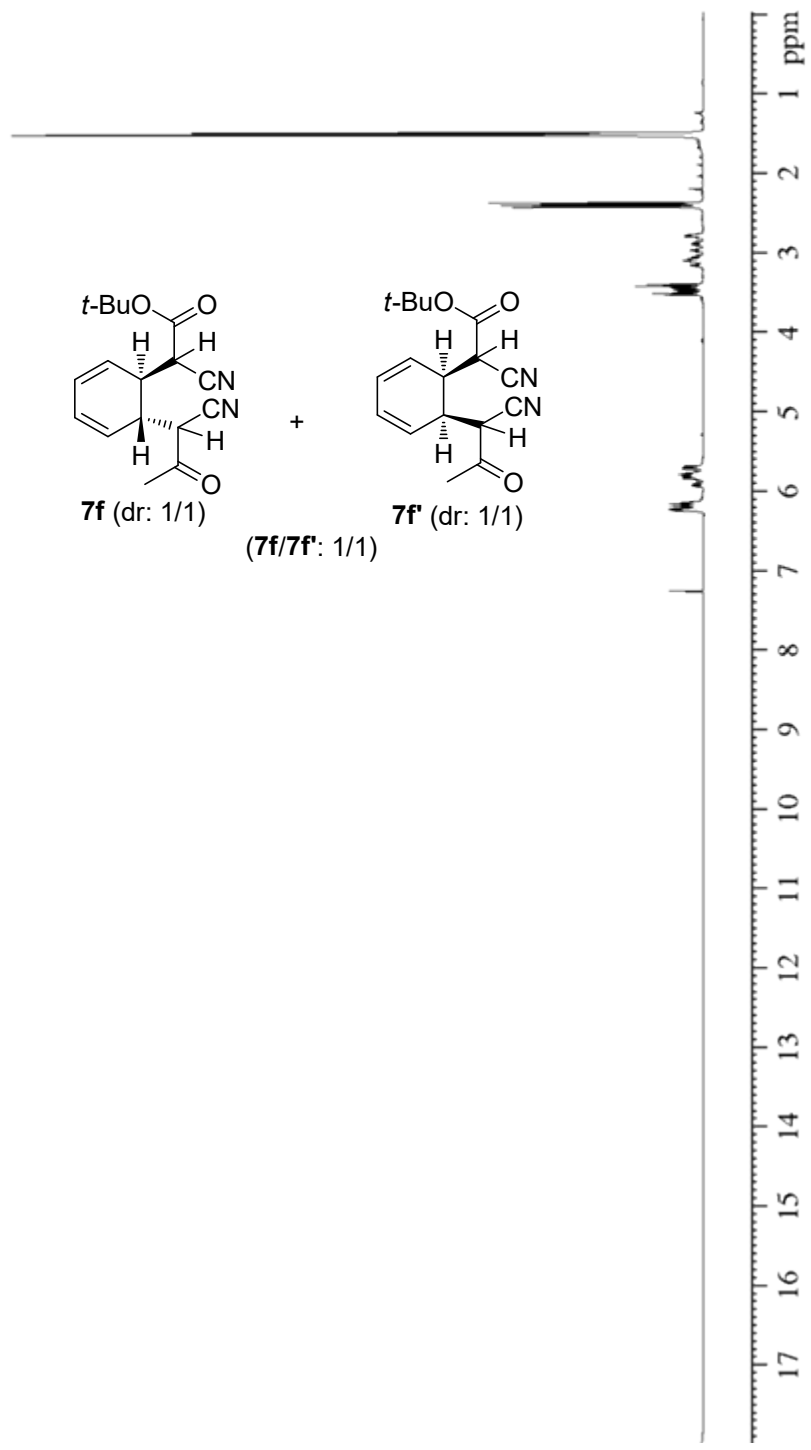



Current Data Parameters  
 NAME zhu-104  
 EXPNO 4  
 PROCNO 1

F2 - Acquisition Parameters  
 Date\_ 20240203  
 Time 22.19  
 INSTRUM spect  
 PROBHD 5 mm QNP 1H/13  
 PULPROG zgpg30  
 TD 65536  
 SOLVENT CDC13  
 NS 2400  
 DS 0  
 SWH 25252.525 Hz  
 FIDRES 0.385323 Hz  
 AQ 1.2976128 sec  
 RG 2050  
 DW 19.800 usec  
 DE 6.50 usec  
 TE 293.7 K  
 D1 2.00000000 sec  
 d11 0.03000000 sec  
 DELTA 1.89999998 sec  
 TD0 1

===== CHANNEL f1 =====  
 NUC1 13C  
 P1 10.00 usec  
 PL1 6.20 dB  
 SFO1 100.6243395 MHz

===== CHANNEL f2 =====  
 CPDPRG2 waltz16  
 NUC2 1H  
 PCPD2 90.00 usec  
 PL2 -0.40 dB  
 PL12 15.80 dB  
 PL13 18.50 dB  
 SFO2 400.1316005 MHz

F2 - Processing parameters  
 SI 32768  
 SF 100.6127750 MHz  
 WDW EM  
 SSB 0  
 LB 1.00 Hz  
 GB 0  
 PC 1.40

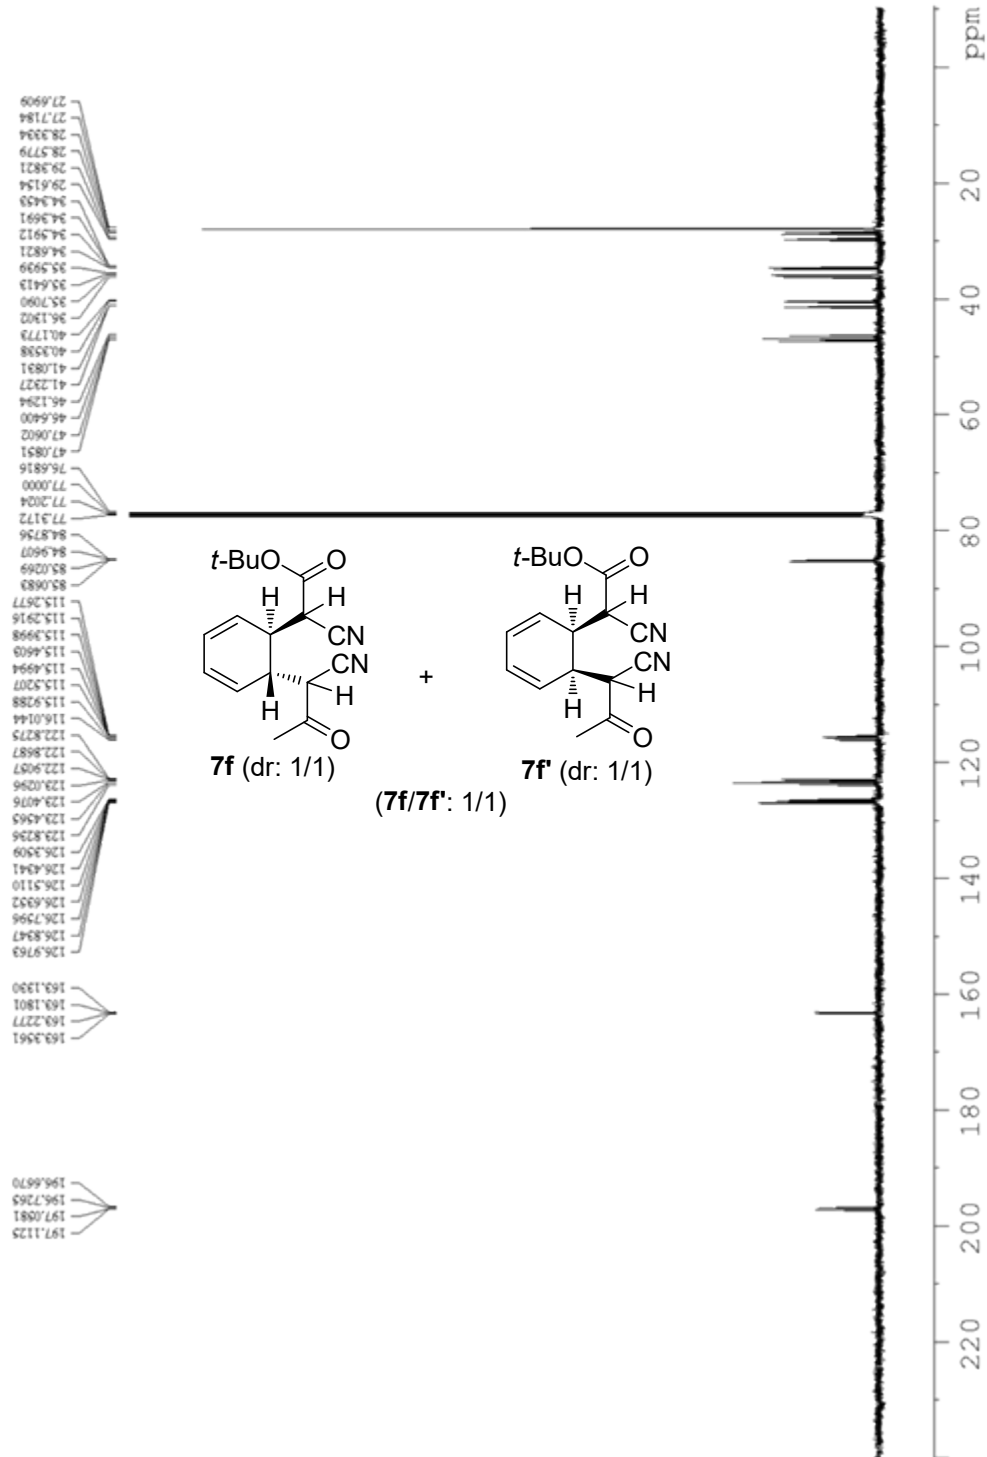

DEPT 90, 135 and  $^{13}\text{C}$ -NMR spectra (100 MHz):

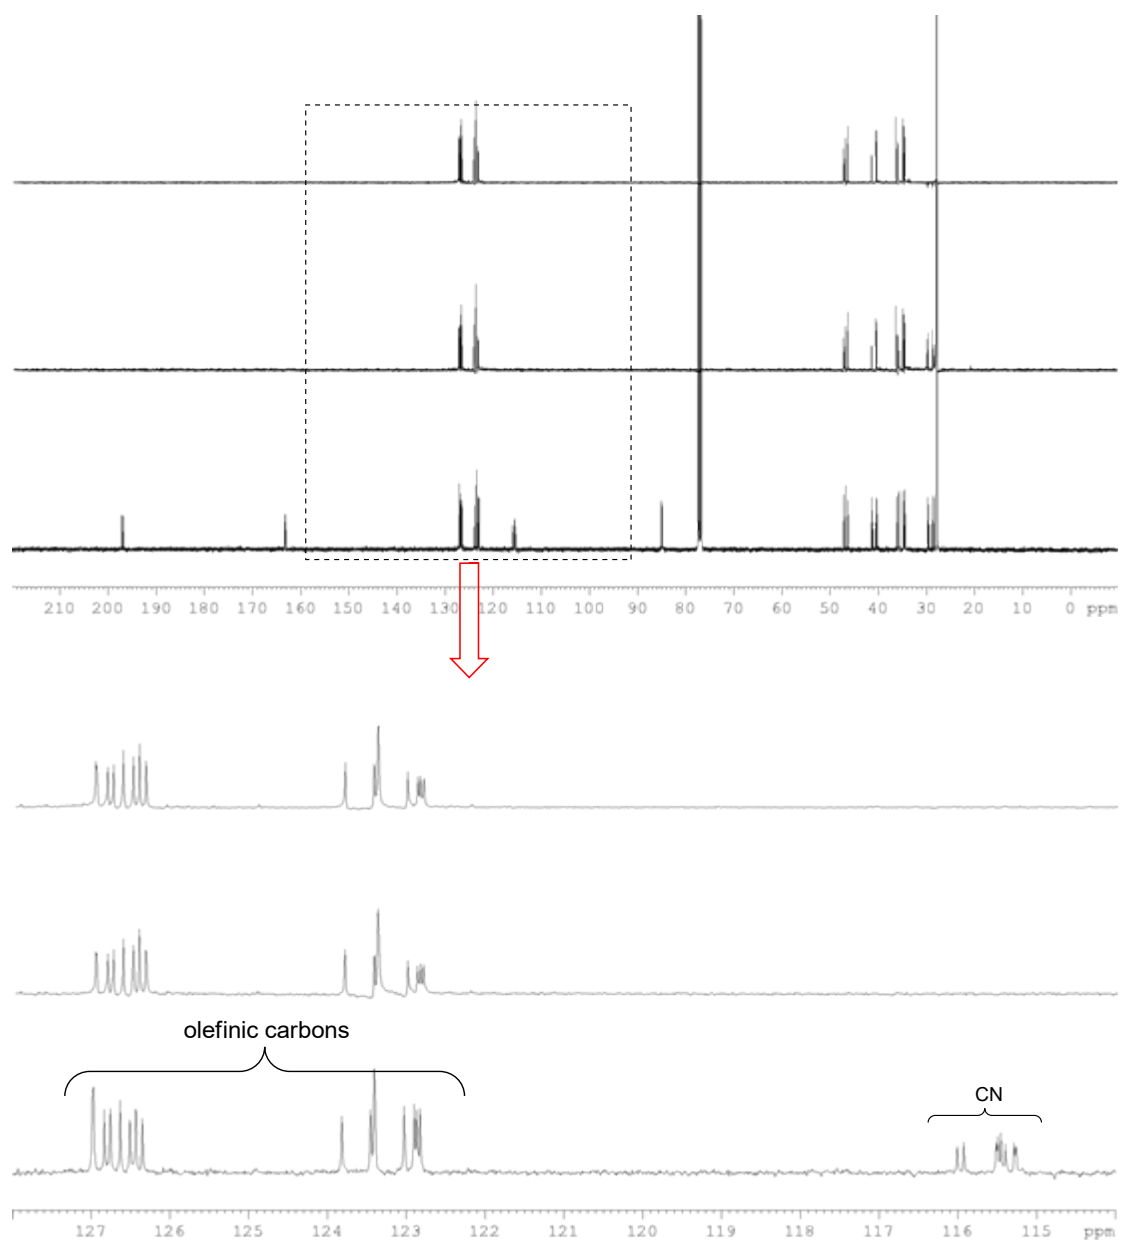

viii) Preparation of **7g/7g'** and <sup>1</sup>H-NMR <sup>13</sup>C-NMR, DEPT spectra

*Trans*-Ethyl 2-cyano-2-[6-(2-ethoxy-2-oxoethyl)cyclohexa-2,4-dien-1-yl]acetate (**7g**) and *Cis*-Ethyl 2-cyano-2-[6-(2-ethoxy-2-oxoethyl)cyclohexa-2,4-dien-1-yl]acetate (**7g'**)

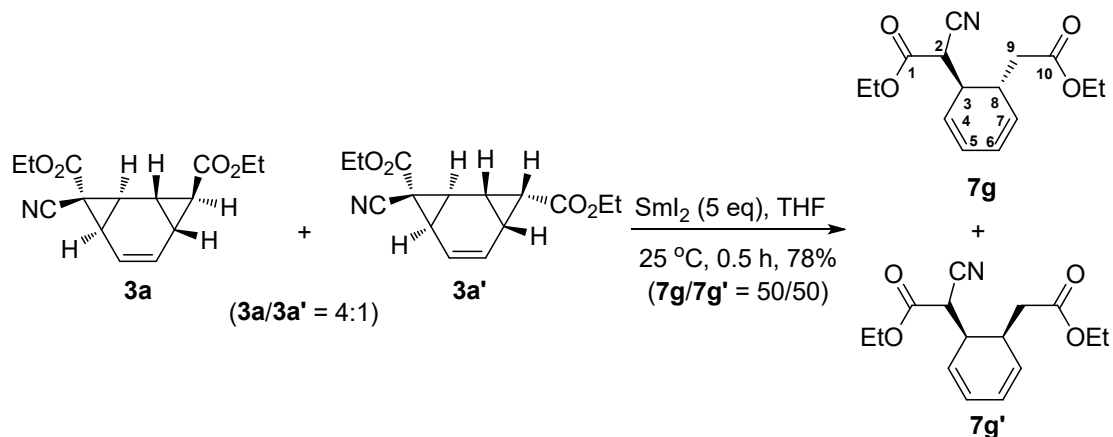

The titled compounds were synthesized from **3a/3a'** by following *Procedure B*. The reaction was performed at ambient temperature for 30 min. After work-up and chromatography (silica gel; hexane/ethyl acetate = 10:1), a mixture of **7g/7g'** was obtained in 78% yield as a colorless oil (**7g/7g'**: 50/50).

IR (neat): 3043, 2980, 2920, 2245, 1730, 1732, 1153, 851, 698  $\text{cm}^{-1}$ .

<sup>1</sup>H NMR (400 MHz,  $\text{CDCl}_3$ ) Olefinic protons of **7g/7g'**:  $\delta$  6.15 (dd,  $J = 9.6, 5.0$  Hz, 0.5 H), 6.09 (dd,  $J = 9.6, 5.2$  Hz, 0.5 H), 6.02-5.97 (m, 1 H), 5.85 (dd,  $J = 9.5, 5.8$  Hz, 0.5 H), 5.81-5.77 (m, 1 H), 5.54 (dd,  $J = 9.5, 5.8$  Hz, 0.5 H); Methylene protons of EtO groups:  $\delta$  4.31-4.22 (m, 2 H), 4.18-4.11 (m, 2 H); H-2 protons of **7g/7g'**:  $\delta$  3.53 (d,  $J = 8.6$  Hz, 1 H), 3.50 (d,  $J = 9.1$  Hz, 1 H); H-3 and H-8 of **7f/7f'**:  $\delta$  2.99-2.94 (m, 0.5 H), 2.86-2.79 (m, 1 H), 2.72-2.67 (m, 0.5 H); Methylene protons at C-9: 2.47-2.33 (m, 2 H); Methyl protons of EtO groups:  $\delta$  1.33 (t,  $J = 7.2$  Hz, 1.5 H), 1.32 (t,  $J = 7.3$  Hz, 1.5 H), 1.27 (t,  $J = 7.1$  Hz, 1.5 H), 1.26 (t,  $J = 7.0$  Hz, 1.5 H) ppm.

<sup>13</sup>C NMR (100 MHz,  $\text{CDCl}_3$ ):  $\delta$  171.4 (EtOCO), 171.3 (EtOCO), 165.0 (EtOCO), 164.9 (EtOCO), 128.0 (=CH), 127.7 (=CH), 126.6 (=CH), 126.4 (=CH), 123.8 (=CH), 123.7 (=CH), 122.5 (=CH), 122.4 (=CH), 115.8 (CN), 115.6 (CN), 63.0 ( $\text{CH}_2\text{O}$ ), 62.9 ( $\text{CH}_2\text{O}$ ), 60.7 ( $\text{CH}_2\text{O}$ ), 60.6 ( $\text{CH}_2\text{O}$ ), 40.2 (CH), 39.8 (CH), 37.6 (CH), 37.5 (CH), 36.7 ( $\text{CH}_2 \times 2$ ; C-9), 32.3 (CH), 32.0 (CH), 14.2 ( $\text{CH}_3 \times 2$ ), 14.0 ( $\text{CH}_3 \times 2$ ) ppm.

HRMS-EI:  $m/z$   $[\text{M}]^+$  calcd. for  $\text{C}_{15}\text{H}_{19}\text{NO}_4$ : 277.1314; found: 277.1315.

Current Data Parameters  
 NAME zhu-105  
 EXPNO 2  
 PROCNO 1

F2 - Acquisition Parameters  
 Date\_ 20240215  
 Time 21:57  
 INSTRUM spect  
 PROBHD 5 mm QNP 1H/13  
 PULPROG zg30  
 TD 32768  
 SOLVENT CDCl3  
 NS 80  
 DS 0  
 SWH 7211.539 Hz  
 FIDRES 0.220079 Hz  
 AQ 2.2719147 sec  
 RG 456  
 DW 69.333 usec  
 DE 6.50 usec  
 TE 291.6 K  
 D1 2.0000000 sec  
 TD0 1

==== CHANNEL f1 =====  
 NUC1 1H  
 P1 15.00 usec  
 PL1 0.90 dB  
 SFO1 400.1336012 MHz  
 F2 - Processing parameters  
 SI 16384  
 SF 400.1300093 MHz  
 WDW EM  
 SSB 0  
 LB 0.30 Hz  
 GB 0  
 PC 1.00

7.2600  
6.1667  
6.1541  
6.1430  
6.1300  
6.1111  
6.0981  
6.0873  
6.0743  
6.0212  
6.0099  
5.9972  
5.9862  
5.9743  
5.8688  
5.8543  
5.8095  
5.7952  
5.7904  
5.7693  
5.6554  
5.6401  
4.3083  
4.2905  
4.2783  
4.2724  
4.2608  
4.2539  
4.2430  
4.2346  
4.1827  
4.1645  
4.1461  
4.1274  
4.1090  
3.5408  
3.5193  
3.5094  
3.4867  
2.9747  
2.9578  
2.8410  
2.8270  
2.8196  
2.8133  
2.7082  
2.6914  
2.4306  
2.4130  
2.4029  
2.3959  
2.3896  
2.3859  
2.3762  
2.3702  
1.3524  
1.3443  
1.3159  
1.2976  
1.2885  
1.2729  
1.2708  
1.2558  
1.2382

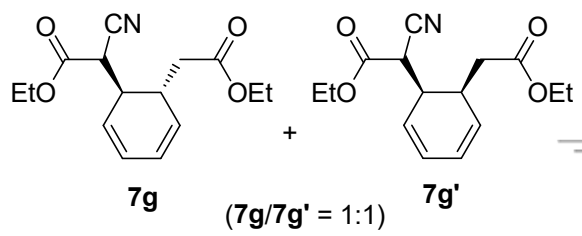

6.7343  
6.5330  
4.2305  
1.0987  
2.0787  
1.0044  
2.0000  
4.1290  
4.2438  
0.9657  
2.1537  
1.0106  
2.0773  
1.0067  
1.0854

Current Data Parameters  
 NAME zhu-105  
 EXPNO 3  
 PROCNO 1

F2 - Acquisition Parameters  
 Date\_ 20240215  
 Time 22.05  
 INSTRUM spect  
 PROBHID 5 mm QNP 1H/13  
 PULPROG zgpg30  
 TD 65536  
 SOLVENT CDCl3  
 NS 2400  
 DS 0  
 SWH 25252.525 Hz  
 FIDRES 0.385323 Hz  
 AQ 1.2976128 sec  
 RG 2050  
 DW 19.800 usec  
 DE 6.50 usec  
 TE 291.8 K  
 D1 2.00000000 sec  
 d11 0.03000000 sec  
 DELTA 1.89999998 sec  
 TD0 1

===== CHANNEL f1 =====  
 NUC1 13C  
 P1 10.00 usec  
 PL1 6.20 dB  
 SFO1 100.6243395 MHz

===== CHANNEL f2 =====  
 CPDPRG2 walz16  
 NUC2 1H  
 PCPD2 90.00 usec  
 PL2 -0.40 dB  
 PL12 15.80 dB  
 PL13 18.50 dB  
 SFO2 400.1316005 MHz

F2 - Processing parameters  
 SI 32768  
 SF 100.6127735 MHz  
 WDW EM  
 SSB 0  
 LB 1.00 Hz  
 GB 0  
 PC 1.40

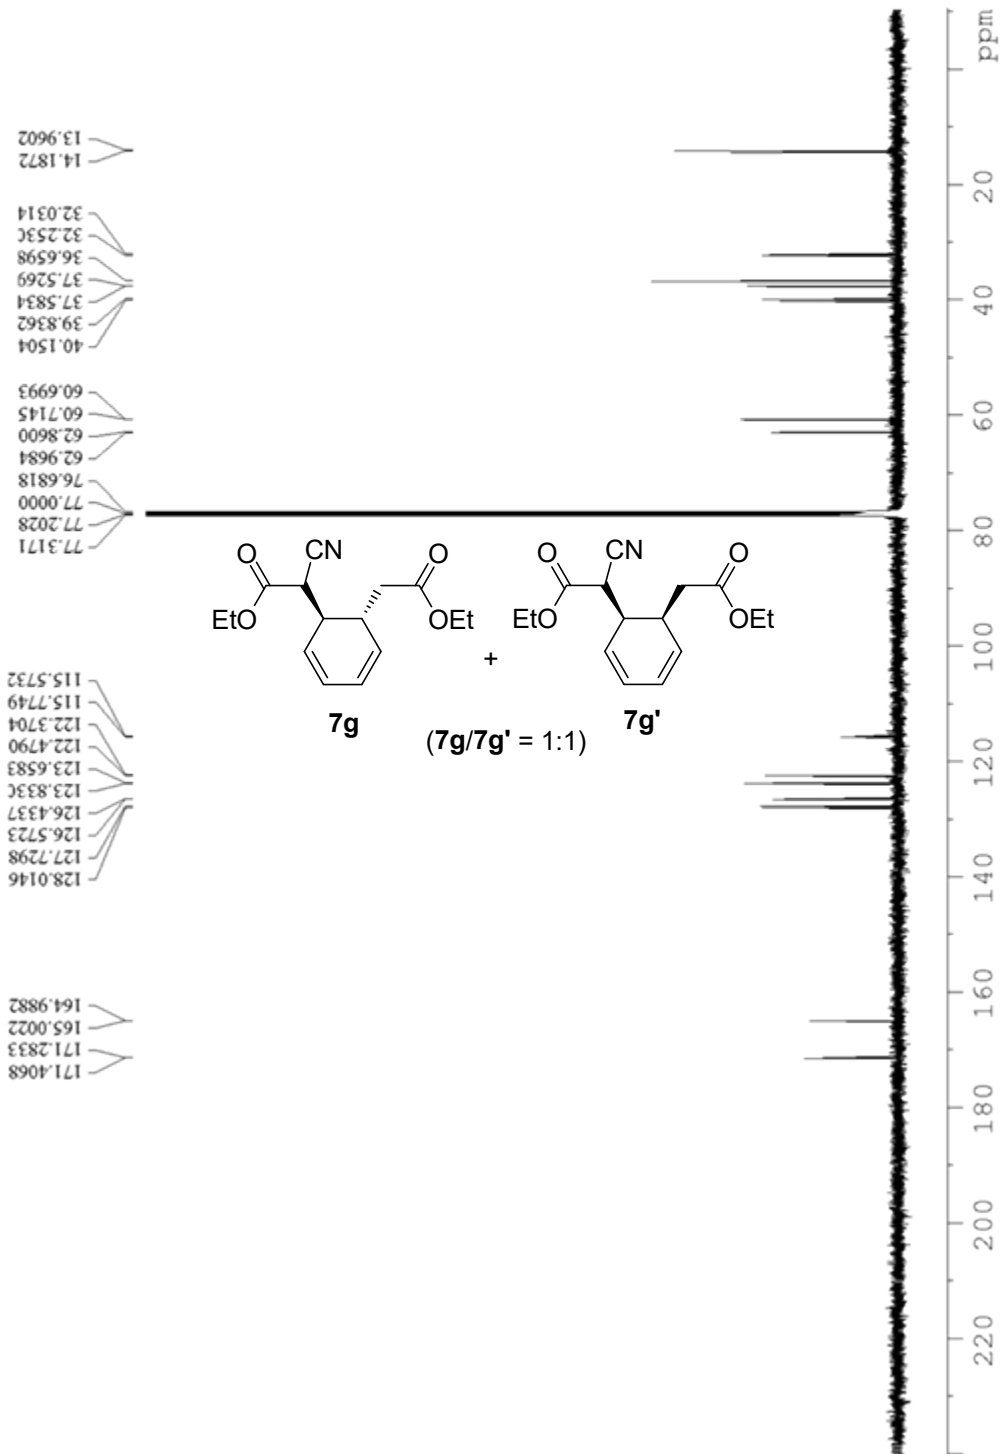

DEPT 90, 135 and  $^{13}\text{C}$  NMR spectra (100 MHz)

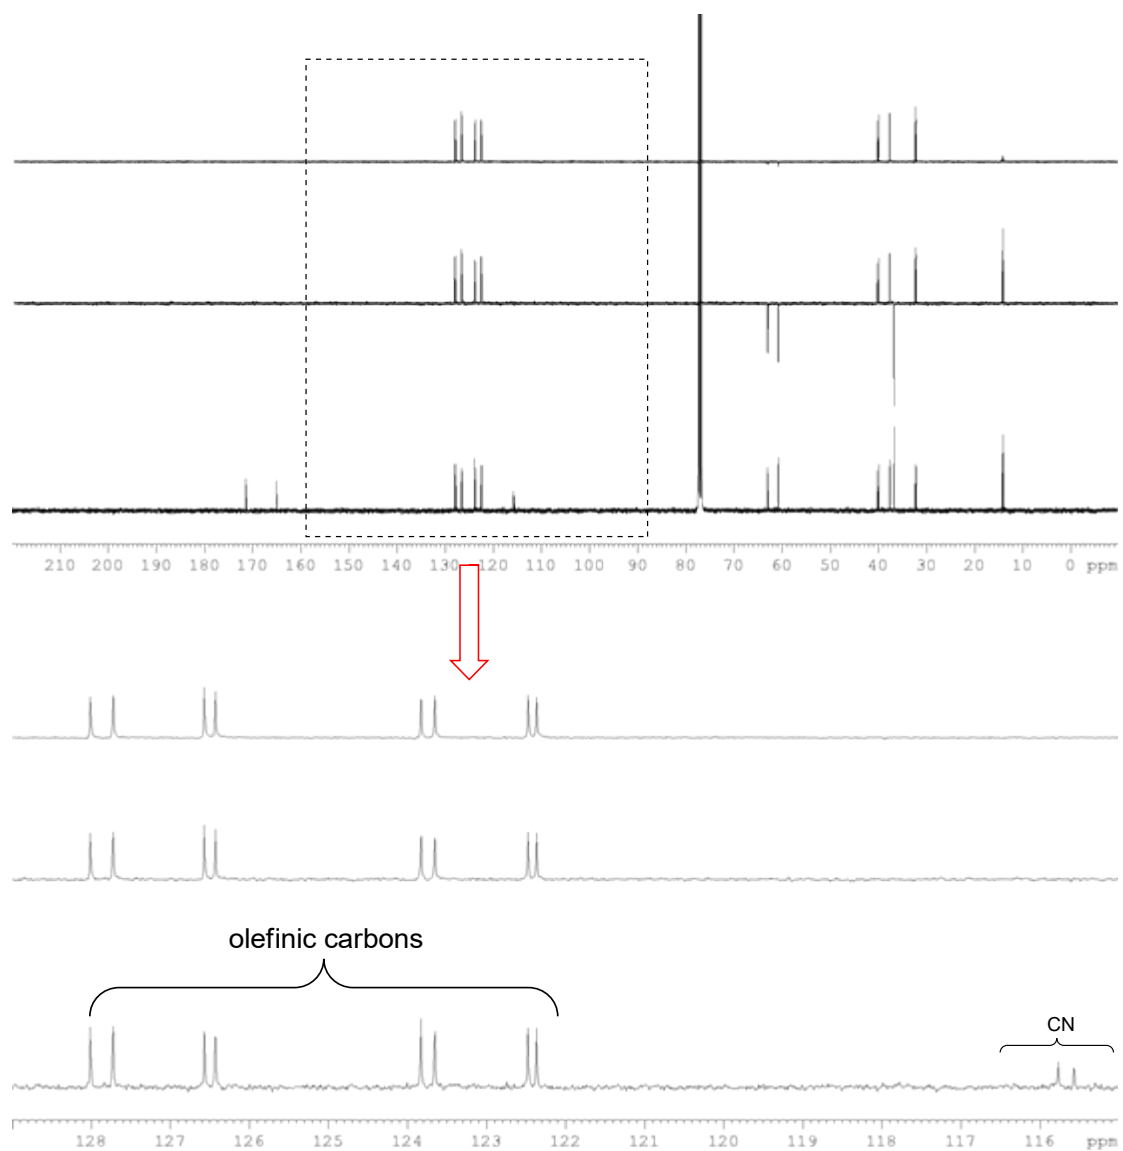

### ix) Preparation of **7h/7h'** and <sup>1</sup>H-NMR <sup>13</sup>C-NMR, DEPT spectra

*Trans-tert-Butyl-2-cyano-2-[6-(1-cyano-2-ethoxy-2-oxoethyl)cyclohexa-2,4-dien-1-yl] acetate* (**7h**) and *Cis-tert-Butyl-2-cyano-2-[6-(1-cyano-2-ethoxy-2-oxoethyl)cyclohexa-2,4-dien-1-yl] acetate* (**7h'**)

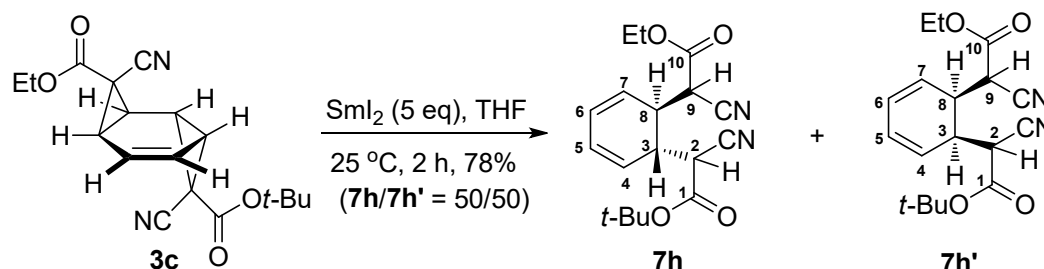

The titled compounds were synthesized from **3c** by following *Procedure B*. The reaction was performed at ambient temperature for 2 h. After work-up and chromatography (silica gel; hexane/ethyl acetate = 7:1), a mixture of **7h/7h'** was obtained in 90% yield as a pale yellow oil (**7h/7h'**: 50/50). (**7h** and **7h'** each includes two diastereomeric pairs deriving from the configurations at C-2/C-9).

IR (neat): 3049, 2983, 2936, 2249, 1738, 1732, 1151, 1150, 837, 703  $\text{cm}^{-1}$ .

<sup>1</sup>H NMR (400 MHz,  $\text{CDCl}_3$ ) Olefinic protons of **7h/7h'**:  $\delta$  6.25-6.17 (m, 2 H), 5.93-5.84 (m, 1 H), 5.79-5.76 (m, 0.5 H), 5.71 (br t,  $J = 7.2$  Hz, 0.5 H); Methylene protons of EtO:  $\delta$  4.35-4.23 (m, 2 H); H-2/H-9 of **7h/7h'**:  $\delta$  3.52 (d,  $J = 8.2$  Hz, 0.75 H), 3.49 (d,  $J = 9.0$  Hz, 0.25 H), 3.44 (d,  $J = 8.2$  Hz, 0.25 H), 3.43-3.38 (m, 0.75 H); H-3 and H-8 of **7h/7h'**:  $\delta$  3.17-3.09 (m, 1 H), 2.94-2.87 (m, 1 H); Methyl of *t*-Bu:  $\delta$  1.53 (s, 2.25 H), 1.51 (s, 4.5 H), 1.50 (s, 2.25 H); Methyl protons of EtO:  $\delta$  1.35 (t,  $J = 7.1$  Hz, 0.75 H), 1.34 (t,  $J = 7.1$  Hz, 0.75 H), 1.33 (t,  $J = 7.1$  Hz, 0.75 H), 1.31 (t,  $J = 7.1$  Hz, 0.75 H) ppm.

<sup>13</sup>C NMR (100 MHz) In  $\text{CDCl}_3$ :  $\delta$  164.4 (ROCO), 164.3 (ROCO), 164.3 (ROCO), 164.2 (ROCO), 163.2 (ROCO x 2), 163.1 (ROCO), 163.1 (ROCO), 127.0 (CH), 126.8 (CH), 126.7 (CH), 126.6 (CH), 126.5 (CH), 123.3 (CH x 2), 123.1 (CH), 123.0 (CH), 122.9 (CH), 122.7 (CH), 122.6 (CH), 115.4 (CN x 2), 115.2 (CN), 115.2 (CN), 115.1 (CN), 115.0 (CN), 114.9 (CN x 2), 85.1 (C-O), 85.0 (C-O), 84.9 (C-O x 2), 63.3 ( $\text{CH}_3\text{CH}_2\text{O}$ ), 63.3 ( $\text{CH}_3\text{CH}_2\text{O}$ ), 63.2 ( $\text{CH}_3\text{CH}_2\text{O}$ ), 63.2 ( $\text{CH}_3\text{CH}_2\text{O}$ ), 41.3 (CH), 41.1 (CH), 40.5 (CH), 40.4 (CH), 40.3 (CH), 40.0 (CH), 39.9 (CH), 36.0 (CH), 35.9 (CH), 35.8 (CH), 35.7 (CH), 35.6 (CH), 35.6 (CH), 35.5 (CH x 3), 27.7 (methyl of *t*-Bu), 27.47 (methyl of *t*-Bu), 27.6 (methyl of *t*-Bu x 2), 13.9 ( $\text{CH}_3\text{CH}_2\text{O}$  x 2), 13.9 ( $\text{CH}_3\text{CH}_2\text{O}$  x 2) ppm; In  $\text{C}_6\text{D}_6$ :  $\delta$  164.6 (ROCO), 164.6 (ROCO), 164.5 (ROCO), 164.4 (ROCO), 163.7 (ROCO), 163.7 (ROCO), 163.6 (ROCO), 163.6 (ROCO), 126.7 (CH), 126.6 (CH), 126.5 (CH x 2), 126.4 (CH), 126.4 (CH), 126.3 (CH), 126.2 (CH), 123.5 (CH), 123.2 (CH), 123.2 (CH), 123.1 (CH), 123.1 (CH), 122.9 (CH),

122.8(CH), 122.7 (CH), 115.5 (CN), 115.4 (CN), 115.3 (CN), 115.2 (CN), 115.1 (CN x 3), 115.0 (CN), 84.4 (C-O), 84.2 (C-O), 84.2 (C-O), 84.1 (C-O), 62.9 (CH<sub>3</sub>CH<sub>2</sub>O), 62.9 (CH<sub>3</sub>CH<sub>2</sub>O), 62.8 (CH<sub>3</sub>CH<sub>2</sub>O), 62.7 (CH<sub>3</sub>CH<sub>2</sub>O), 41.8 (CH), 41.4 (CH), 41.0 (CH), 40.9 (CH), 40.8 (CH), 40.4 (CH), 40.2 (CH), 39.8 (CH), 36.5 (CH), 36.3 (CH), 36.2 (CH x 2), 35.1 (CH x 2), 36.0 (CH), 35.9 (CH), 27.5 (methyl of *t*-Bu) 27.4 (methyl of *t*-Bu), 27.4 (methyl of *t*-Bu x 2), 13.7 (CH<sub>3</sub>CH<sub>2</sub>O), 13.7 (CH<sub>3</sub>CH<sub>2</sub>O), 13.6 (CH<sub>3</sub>CH<sub>2</sub>O), 13.6 (CH<sub>3</sub>CH<sub>2</sub>O) ppm.

HRMS-EI:  $m/z$  [M]<sup>+</sup> calcd. for C<sub>18</sub>H<sub>22</sub>N<sub>2</sub>O<sub>4</sub>: 330.1580; found: 330.1587.



Current Data Parameters  
 NAME zhu-106 repeat  
 EXPNO 3  
 PROCNO 1

F2 - Acquisition Parameters  
 Date\_ 20240305  
 Time 22.12  
 INSTRUM spect  
 PROBHD 5 mm QNP 1H/13  
 PULPROG zg30  
 TD 32768  
 SOLVENT CDCl3  
 NS 80  
 DS 0  
 SWH 7211.539 Hz  
 FIDRES 0.220079 Hz  
 AQ 2.2719147 sec  
 RG 228  
 DW 69.333 usec  
 DE 6.50 usec  
 TE 293.5 K  
 D1 2.00000000 sec  
 TD0 1

===== CHANNEL f1 =====  
 NUC1 1H  
 P1 15.00 usec  
 PL1 0.90 dB  
 SFO1 400.1336012 MHz

F2 - Processing parameters  
 SI 16384  
 SF 400.1300092 MHz  
 WDW EM  
 SSB 0  
 LB 0.30 Hz  
 GB 0  
 PC 1.00

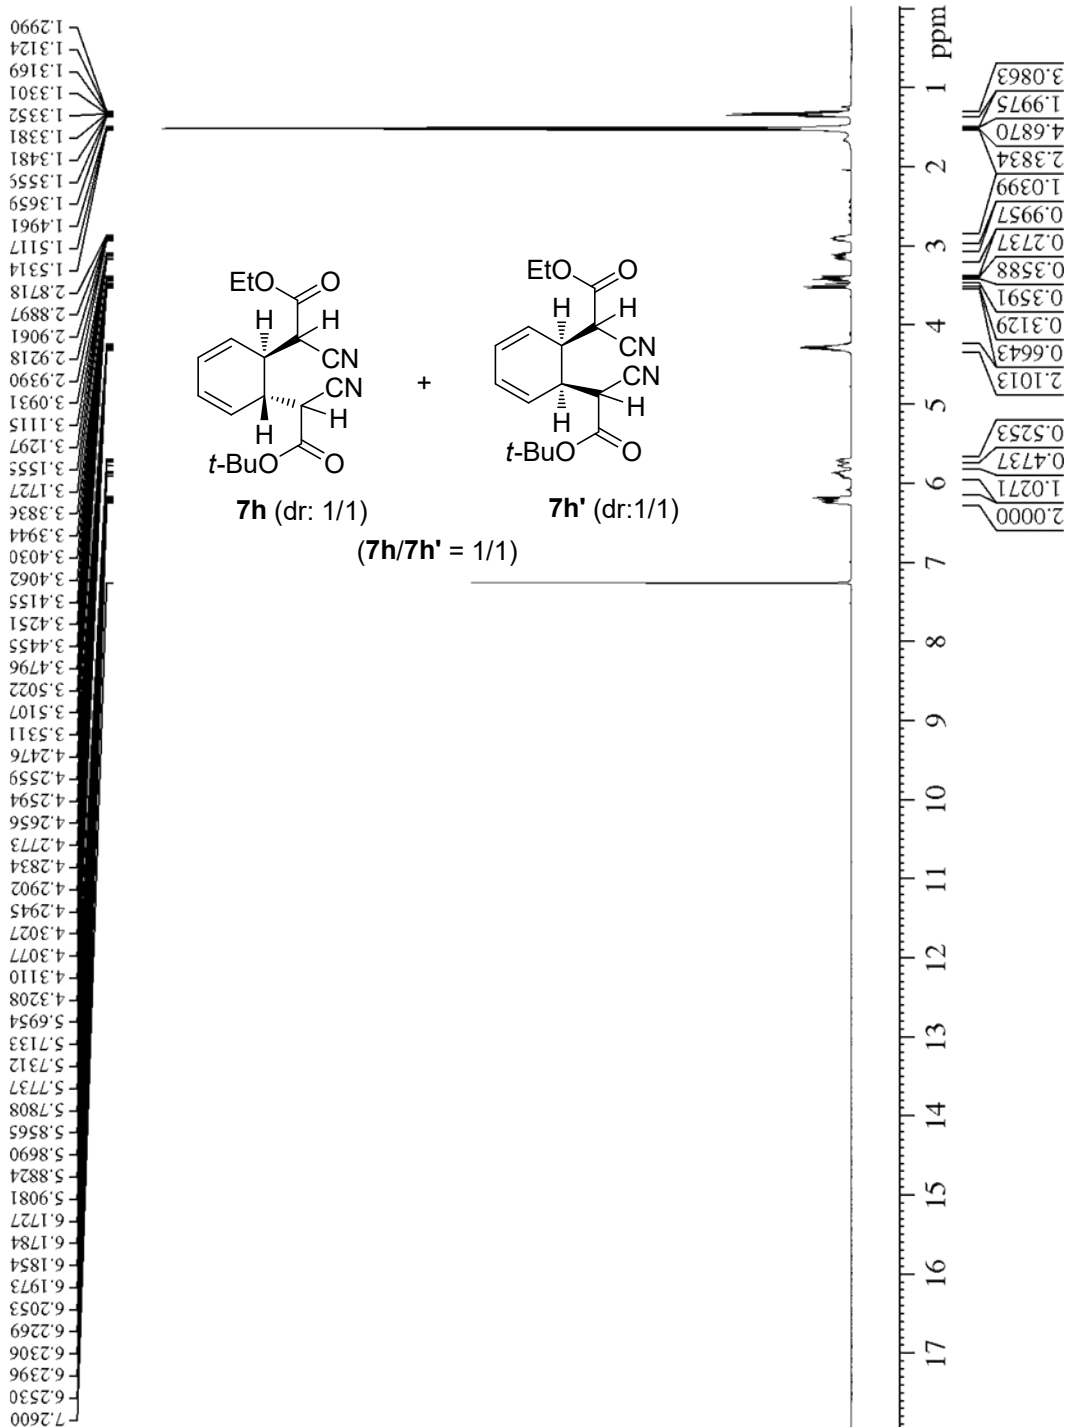

Current Data Parameters  
 NAME zhu-106 repeat  
 EXPNO 4  
 PROCNO 1

F2 - Acquisition Parameters  
 Date\_ 20240305  
 Time 22:33  
 INSTRUM spect  
 PROBHD 5 mm QNP 1H/13  
 PULPROG zgpg30  
 TD 65536  
 SOLVENT CDCl3  
 NS 2400  
 DS 0  
 SWH 25252.525 Hz  
 FIDRES 0.385323 Hz  
 AQ 1.2976128 sec  
 RG 2050  
 DW 19.800 usec  
 DE 6.50 usec  
 TE 293.7 K  
 D1 2.0000000 sec  
 d11 0.0300000 sec  
 DELTA 1.89999998 sec  
 TD0 1

==== CHANNEL f1 =====  
 NUC1 13C  
 P1 10.00 usec  
 PL1 6.20 dB  
 SFO1 100.6243395 MHz

==== CHANNEL f2 =====  
 CPDPRG2 waltz16  
 NUC2 1H  
 PCPD2 90.00 usec  
 PL2 -0.40 dB  
 PL12 15.80 dB  
 PL13 18.50 dB  
 SFO2 400.1316005 MHz

F2 - Processing parameters  
 SI 32768  
 SF 100.6127749 MHz  
 WDW EM  
 SSB 0  
 LB 1.00 Hz  
 GB 0  
 PC 1.40

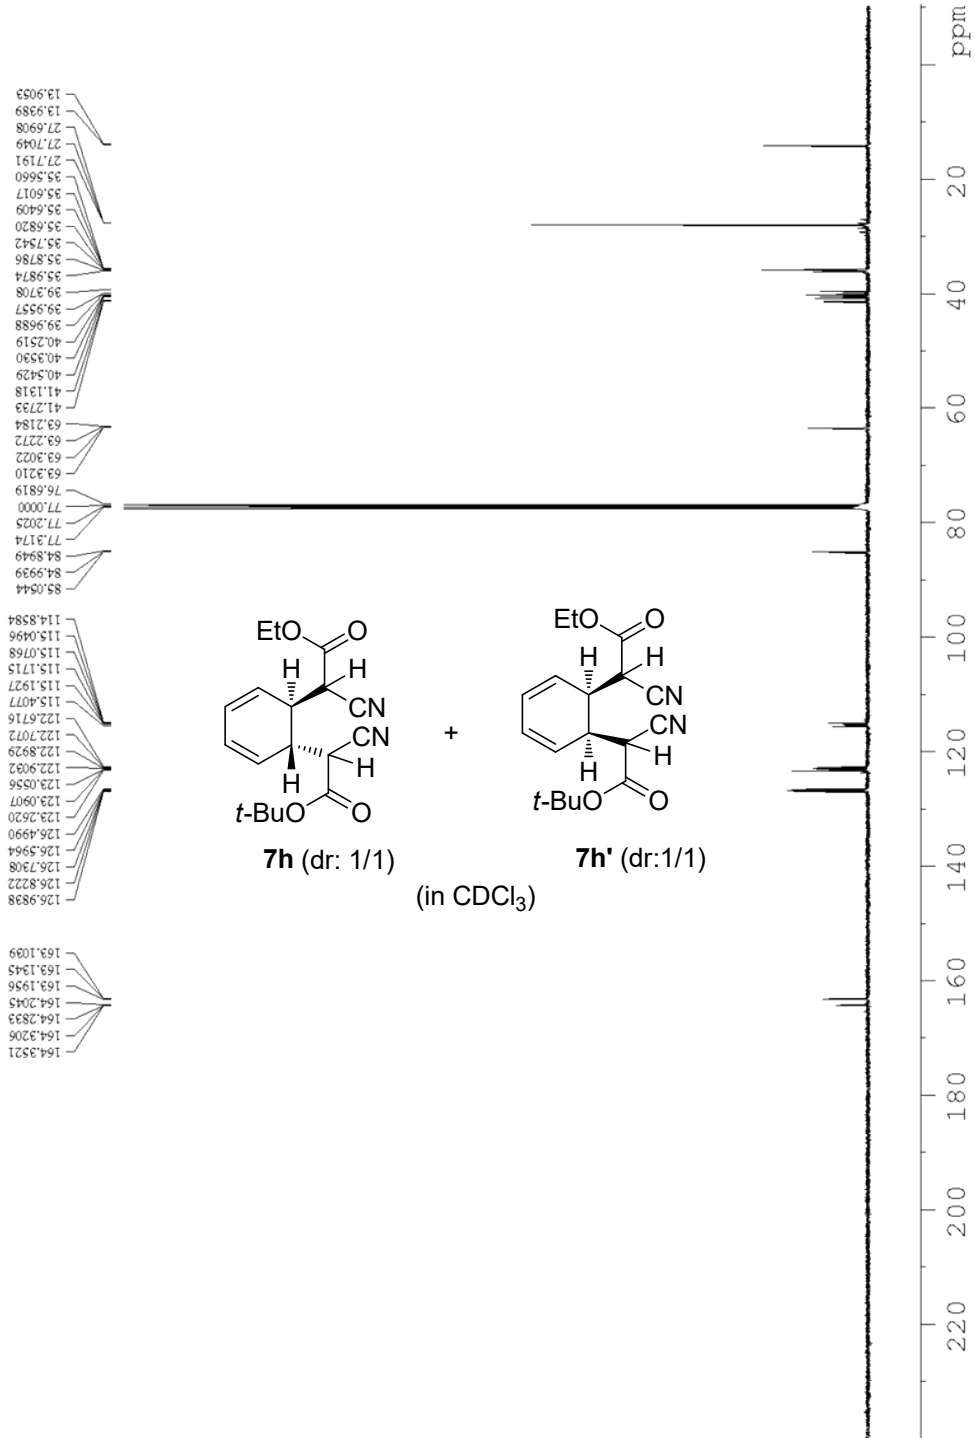

Current Data Parameters  
 NAME zhu-106 c6d6  
 EXPNO 4  
 PROCNO 1

F2 - Acquisition Parameters  
 Date\_ 20240310  
 Time 22.29  
 INSTRUM spect  
 PROBHD 5 mm QNP 1H/13  
 PULPROG zgpg30  
 TD 65536  
 SOLVENT C6D6  
 NS 2400  
 DS 0  
 SWH 25252.525 Hz  
 FIDRES 0.385323 Hz  
 AQ 1.2976128 sec  
 RG 2050  
 DW 19.800 usec  
 DE 6.50 usec  
 TE 292.2 K  
 D1 2.00000000 sec  
 d11 0.03000000 sec  
 DELTA 1.89999998 sec  
 TDO 1

==== CHANNEL f1 =====  
 NUC1 13C  
 P1 10.00 usec  
 PL1 6.20 dB  
 SFO1 100.6243395 MHz

==== CHANNEL f2 =====  
 CPDPRG2 waltz16  
 NUC2 1H  
 PCPD2 90.00 usec  
 PL2 -0.40 dB  
 PL12 15.80 dB  
 PL13 18.50 dB  
 SFO2 400.1316005 MHz

F2 - Processing parameters  
 SI 32768  
 SF 100.6127510 MHz  
 WDW EM  
 SSB 0  
 LB 1.00 Hz  
 GB 0  
 PC 1.40

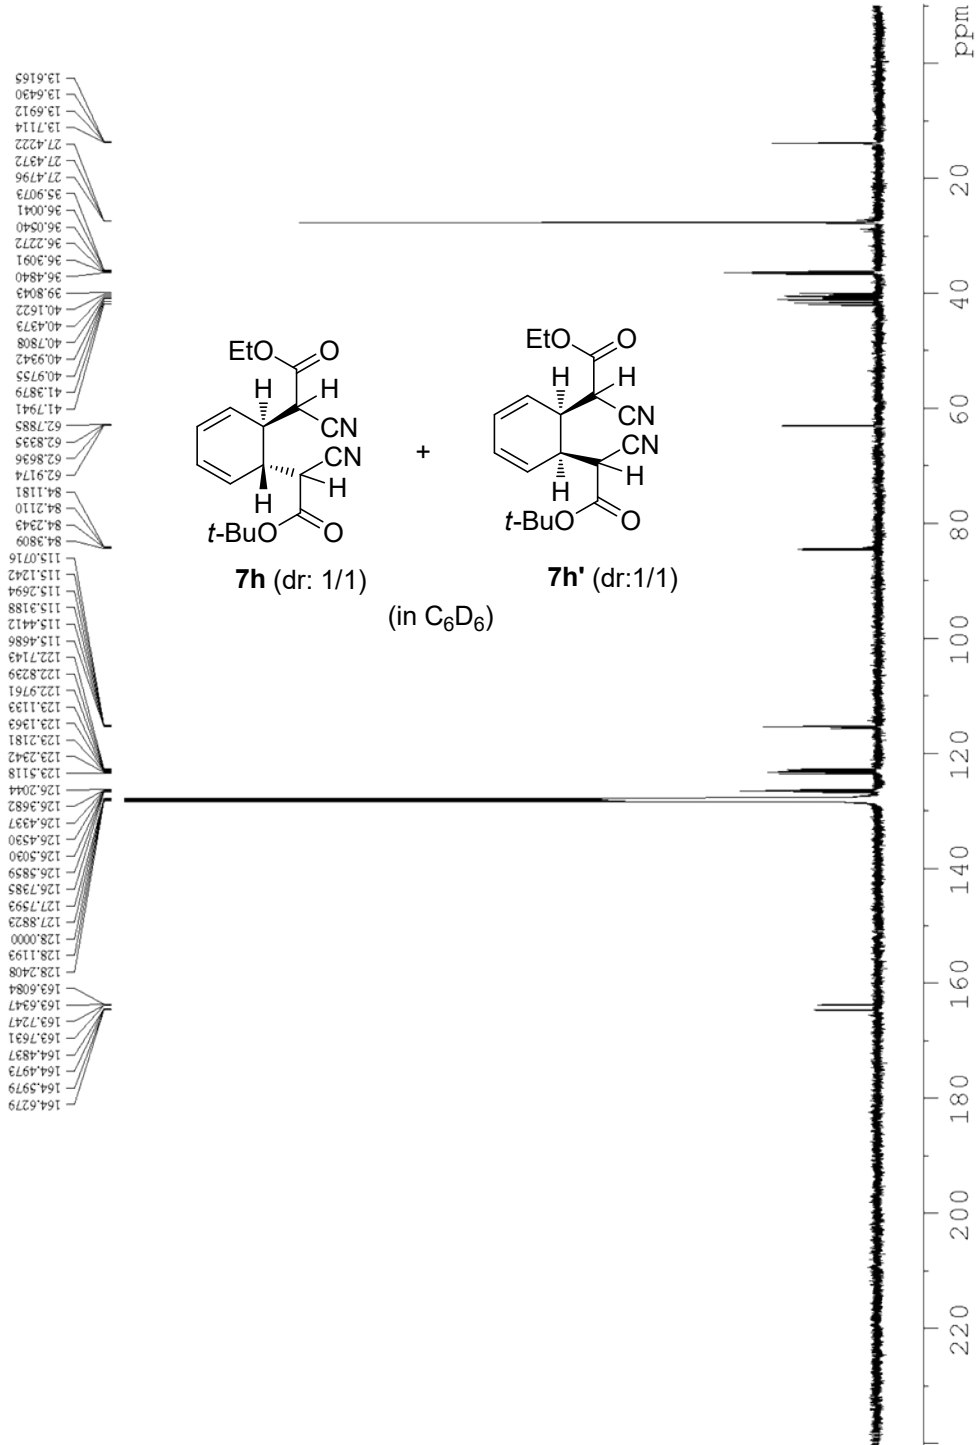

DEPT 90, 135 and  $^{13}\text{C}$  NMR spectra (100 MHz in  $\text{C}_6\text{D}_6$ )

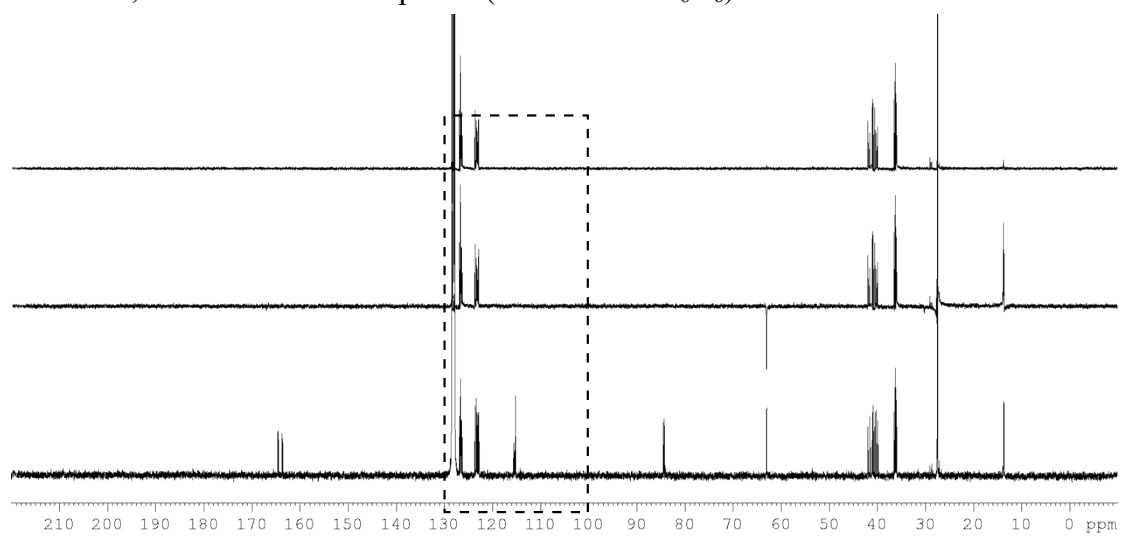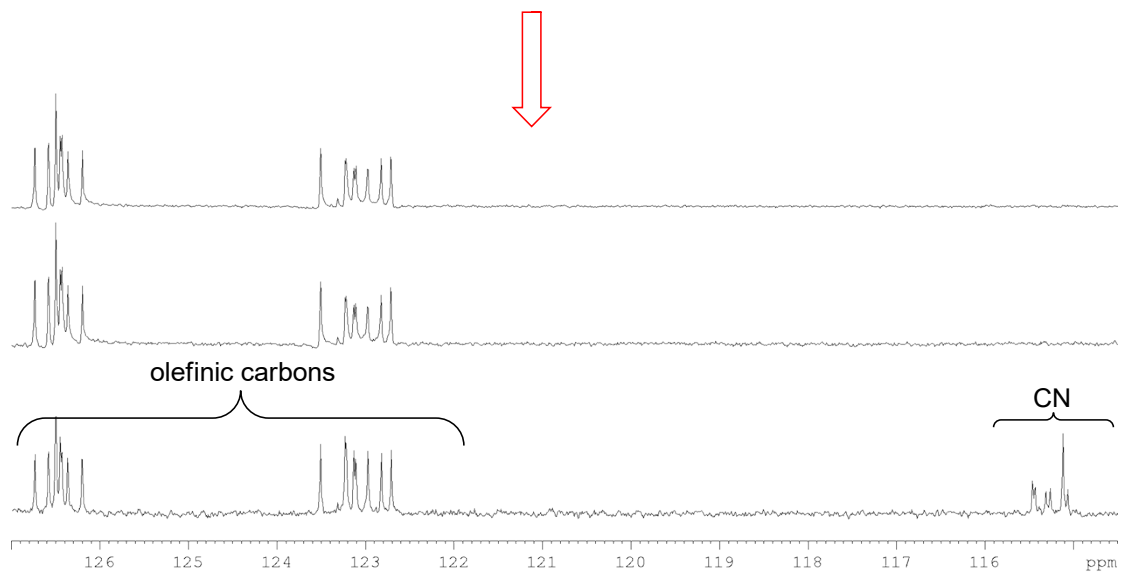

## 9) Formation of Dihydrobenzofurans **8a-c**

### i) Formation of **8a** and <sup>1</sup>H-NMR <sup>13</sup>C-NMR, DEPT, NOESY Spectra

#### *Cis*-2-Phenyl-3a,7a-dihydrobenzofuran-3-carbonitrile (**8a**)

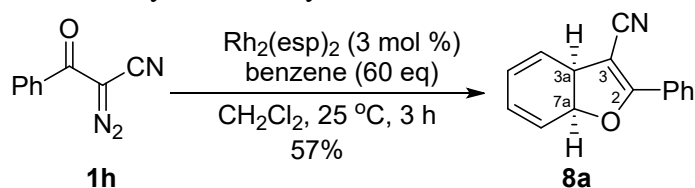

A solution of **1 h** (62.6 mg, 0.3657 mmol) in  $\text{CH}_2\text{Cl}_2$  (4.1 mL, 0.09 M) was slowly added to a stirred suspension of  $\text{Rh}_2(\text{esp})_2$  (8.7 mg, 96%, 0.03 equiv relative to **1h**) in benzene (1.96 mL, 60 equiv, 21.94 mmol) via a syringe over 10 min. The mixture was stirred at rt for 3 h until TLC showed the complete conversion of initially formed norcaradiene ( $R_f = 0.35$ ; hexane/ethyl acetate = 20:1) into **8a** ( $R_f = 0.5$ ). After concentration, the crude residue was loaded on a basic  $\text{Al}_2\text{O}_3$  column and eluted with hexane/ethyl acetate (50:1) to give **8a** as a yellow solid (46.1 mg, 57%). <sup>1</sup>H NMR (400 MHz,  $\text{CDCl}_3$ )  $\delta$  7.94 (dd,  $J = 6.9, 1.2$  Hz, 2 H, Ph), 7.49-7.42 (m, 3 H, Ph), 6.18 (dd,  $J = 9.6, 5.4$  Hz, 1 H), 6.04-6.00 (m, 1 H), 5.94-5.89 (m, 2 H), 5.55 (dd,  $J = 13.2, 4.8$  Hz, 1 H, H-7a), 4.17 (dm,  $J = 13.2$  Hz, 1 H, H-3a) ppm; <sup>13</sup>C NMR (100 MHz,  $\text{CDCl}_3$ )  $\delta$  167.4 (C-2), 131.5, 128.6, 127.7, 127.3, 127.2, 125.1, 121.5 119.7, 117.5 (CN), 82.7 (C-3), 78.6 (C-7a), 42.3 (C-3a) ppm; HRMS-EI:  $m/z$   $[\text{M}]^+$  calcd. for  $\text{C}_{15}\text{H}_{11}\text{NO}$ : 221.0841; found: 221.0831.

Current Data Parameters  
 NAME zhu-70-1  
 EXPNO 1  
 PROCNO 1

F2 - Acquisition Parameters

Date\_ 20230625  
 Time 17.13  
 INSTRUM spect  
 PROBHD 5 mm QNP 1H/13  
 PULPROG zg30  
 TD 32768  
 SOLVENT CDCl3  
 NS 32  
 DS 0  
 SWH 7211.539 Hz  
 FIDRES 0.220079 Hz  
 AQ 2.2719147 sec  
 RG 322  
 DW 69.333 usec  
 DE 6.50 usec  
 TE 293.2 K  
 D1 2.00000000 sec  
 TD0 1

==== CHANNEL f1 =====

NUC1 1H  
 P1 15.00 usec  
 PL1 0.90 dB  
 SFO1 400.1336012 MHz

F2 - Processing parameters

SI 16384  
 SF 400.1300091 MHz  
 WDW EM  
 SSB 0  
 LB 0.30 Hz  
 GB 0  
 PC 1.00

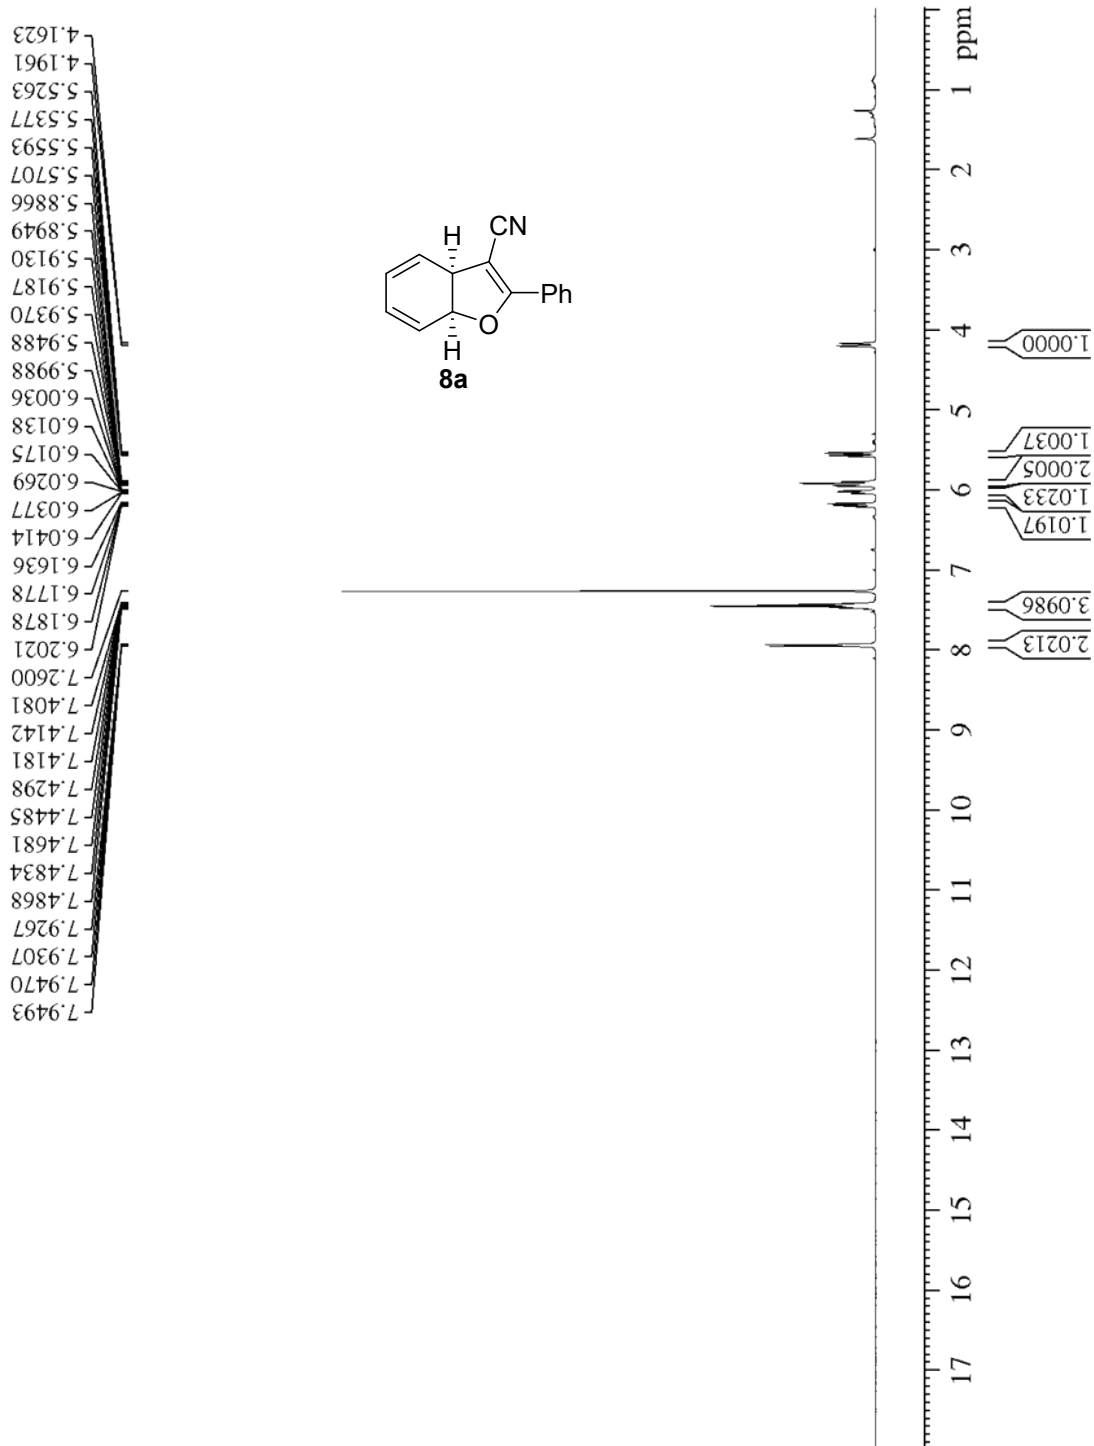

Current Data Parameters  
 NAME zhu-45  
 EXPNO 2  
 PROCNO 1

F2 - Acquisition Parameters  
 Date\_ 20230305  
 Time 13.50  
 INSTRUM spect  
 PROBHD 5 mm QNP 1H/13  
 PULPROG zgpg30  
 TD 65536  
 SOLVENT CDCl3  
 NS 450  
 DS 0  
 SWH 25252.525 Hz  
 FIDRES 0.385323 Hz  
 AQ 1.2976128 sec  
 RG 1030  
 DW 19.800 usec  
 DE 6.50 usec  
 TE 292.5 K  
 D1 2.00000000 sec  
 d11 0.03000000 sec  
 DELTA 1.89999998 sec  
 TD0 1

==== CHANNEL f1 =====  
 NUC1 13C  
 P1 10.00 usec  
 PL1 6.20 dB  
 SFO1 100.6243395 MHz

==== CHANNEL f2 =====  
 CPDPRG2 waltz16  
 NUC2 1H  
 PCPD2 90.00 usec  
 PL2 -0.40 dB  
 PL12 15.80 dB  
 PL13 18.50 dB  
 SFO2 400.1316005 MHz

F2 - Processing parameters  
 SI 32768  
 SF 100.6127734 MHz  
 WDW EM  
 SSB 0  
 LB 1.00 Hz  
 GB 0  
 PC 1.40

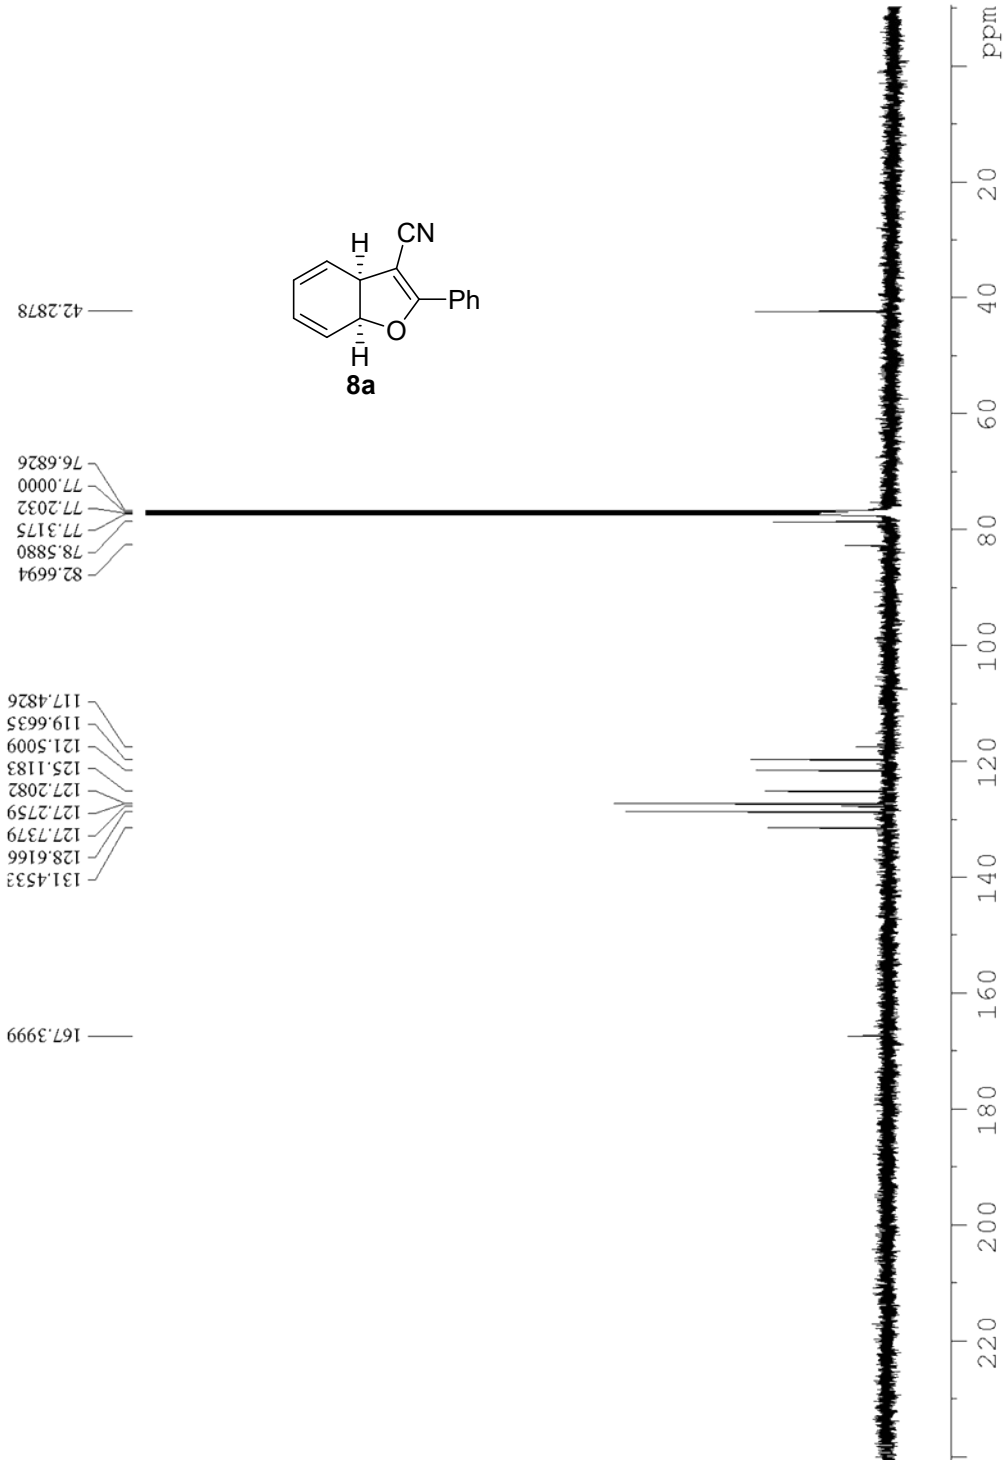

DEPT 90, 135 and  $^{13}\text{C}$  NMR spectra (100 MHz in  $\text{CDCl}_3$ ):

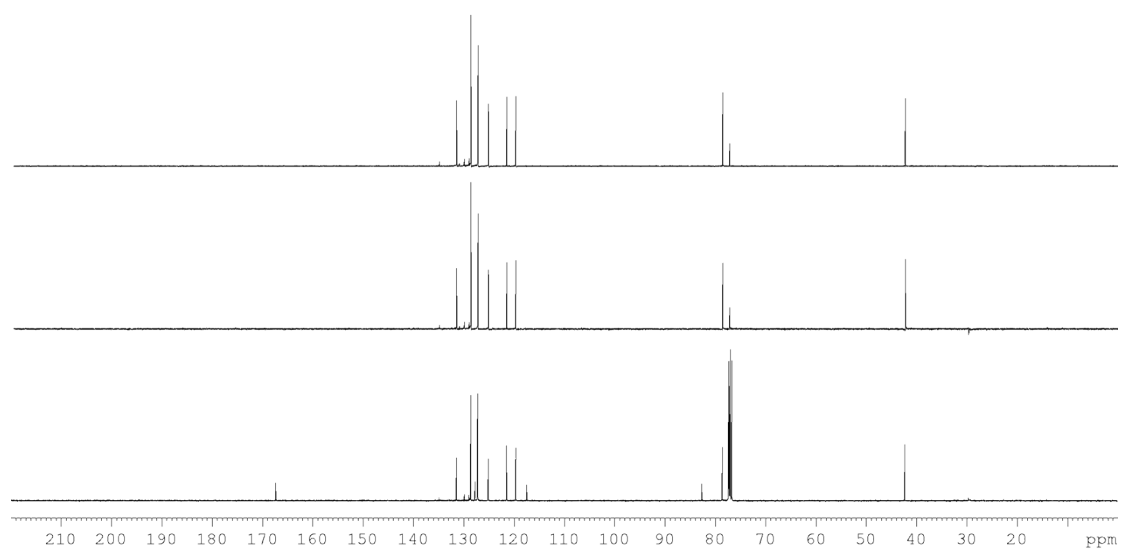

NOESY spectrum (600 MHz in  $\text{CDCl}_3$ ):

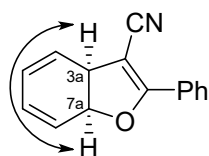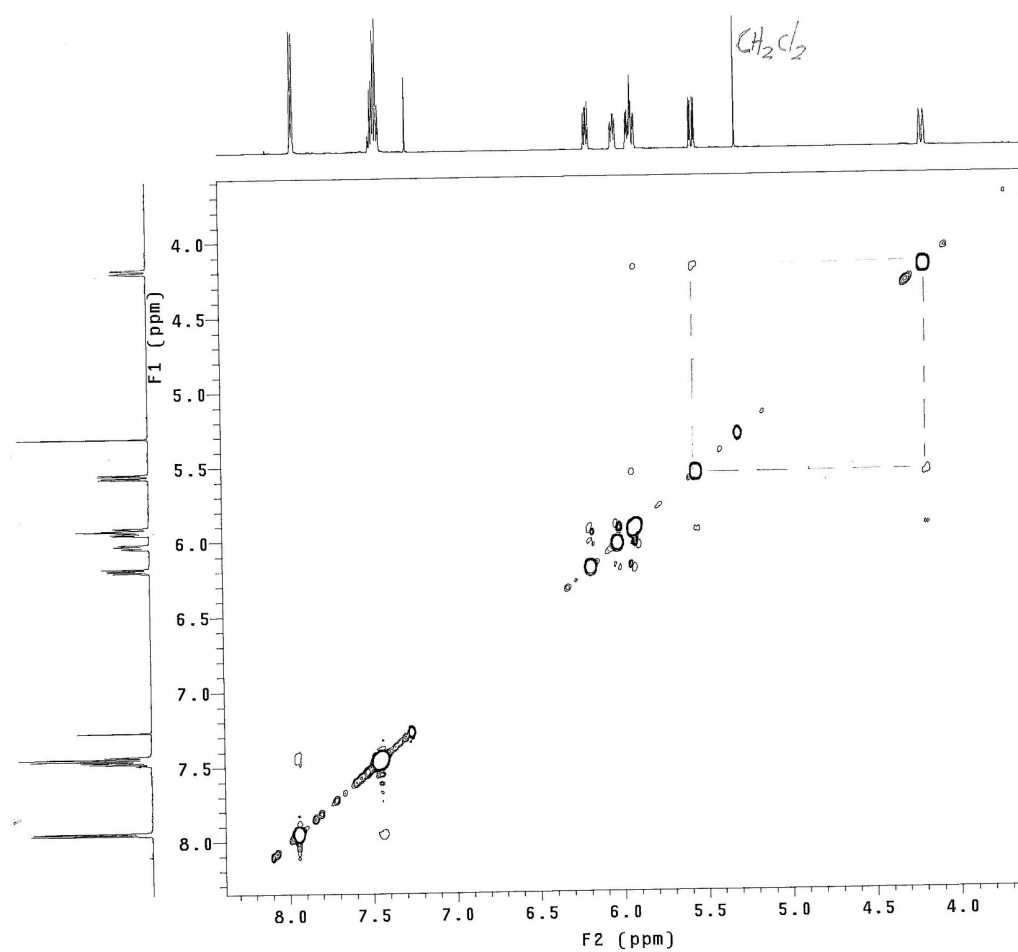



## ii) Formation of **8b** and <sup>1</sup>H-NMR, <sup>13</sup>C-NMR spectra

*Cis*-6-Methyl-2-phenyl-3a,7a-dihydrobenzofuran-3-carbonitrile (**8b**)

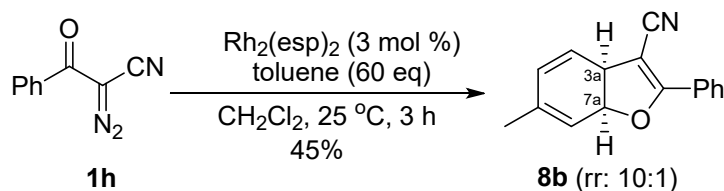

The titled compound was synthesized from **1h** ( $R_f = 0.4$ ; hexane/ethyl acetate = 20:1) and toluene following the procedure for the preparation of **8a**. The reaction mixture was stirred at ambient temperature for 3 h until TLC showed the complete conversion of initially formed norcaradiene ( $R_f = 0.45$ ; hexane/ethyl acetate = 20:1) to **8b** ( $R_f = 0.6$ ). After concentration, the crude residue was subjected to chromatography (basic aluminium oxide; hexane/ethyl acetate = 60:1) to provide **8b** as a yellow solid (45%; rr = 10:1). <sup>1</sup>H NMR (400 MHz, CDCl<sub>3</sub>) major isomer:  $\delta$  7.92 (br d,  $J = 6.9$  Hz, 2 H, Ph), 7.47-7.40 (m, 3 H, Ph), 5.95-5.89 (m, 2 H), 5.75-5.68 (m, 1 H), 5.49 (dd,  $J = 13.1, 4.6$  Hz, 1 H, H-7a), 4.09 (br d,  $J = 13.1$  Hz, 1 H, H-3a), 1.87 (s, 3 H, CH<sub>3</sub>) ppm; minor isomer:  $\delta$  7.94-7.80 (m, 2 H, Ph), 7.47-7.40 (m, 3 H, Ph), 6.05-5.70 (m, 3 H), 5.60-5.42 (m, 1 H, H-7a), 3.82 (m, 1 H, H-3a), 1.87 (s, 3 H, CH<sub>3</sub>) ppm; <sup>13</sup>C NMR (100 MHz, CDCl<sub>3</sub>) major isomer:  $\delta$  167.6 (C-2), 136.2, 131.4, 128.6, 127.8, 127.2, 125.6, 125.3, 117.4, 114.5 (CN), 82.4 (C-3), 79.7 (C-7a), 41.9 (C-3a), 22.1 (Me) ppm; major isomer:  $\delta$  124.8, 124.5, 121.3, 48.9, 28.9 ppm; HRMS-EI:  $m/z$  [M]<sup>+</sup> calcd. for C<sub>16</sub>H<sub>13</sub>NO: 235.0997; found: 235.1001.

Current Data Parameters  
 NAME zhu-107  
 EXPNO 1  
 PROCNO 1

F2 - Acquisition Parameters  
 Date\_ 20240319  
 Time 11.27  
 INSTRUM spect  
 PROBHD 5 mm QNP 1H/13  
 PULPROG zg30  
 TD 32768  
 SOLVENT CDCl3  
 NS 32  
 DS 0  
 SWH 7211.539 Hz  
 FIDRES 0.220079 Hz  
 AQ 2.2719147 sec  
 RG 406  
 DW 69.333 usec  
 DE 6.50 usec  
 TE 292.9 K  
 D1 2.00000000 sec  
 TD0 1

==== CHANNEL f1 =====  
 NUC1 1H  
 P1 15.00 usec  
 PL1 0.90 dB  
 SFO1 400.1336012 MHz

F2 - Processing parameters  
 SI 16384  
 SF 400.1300092 MHz  
 WDW EM  
 SSB 0  
 LB 0.30 Hz  
 GB 0  
 PC 1.00

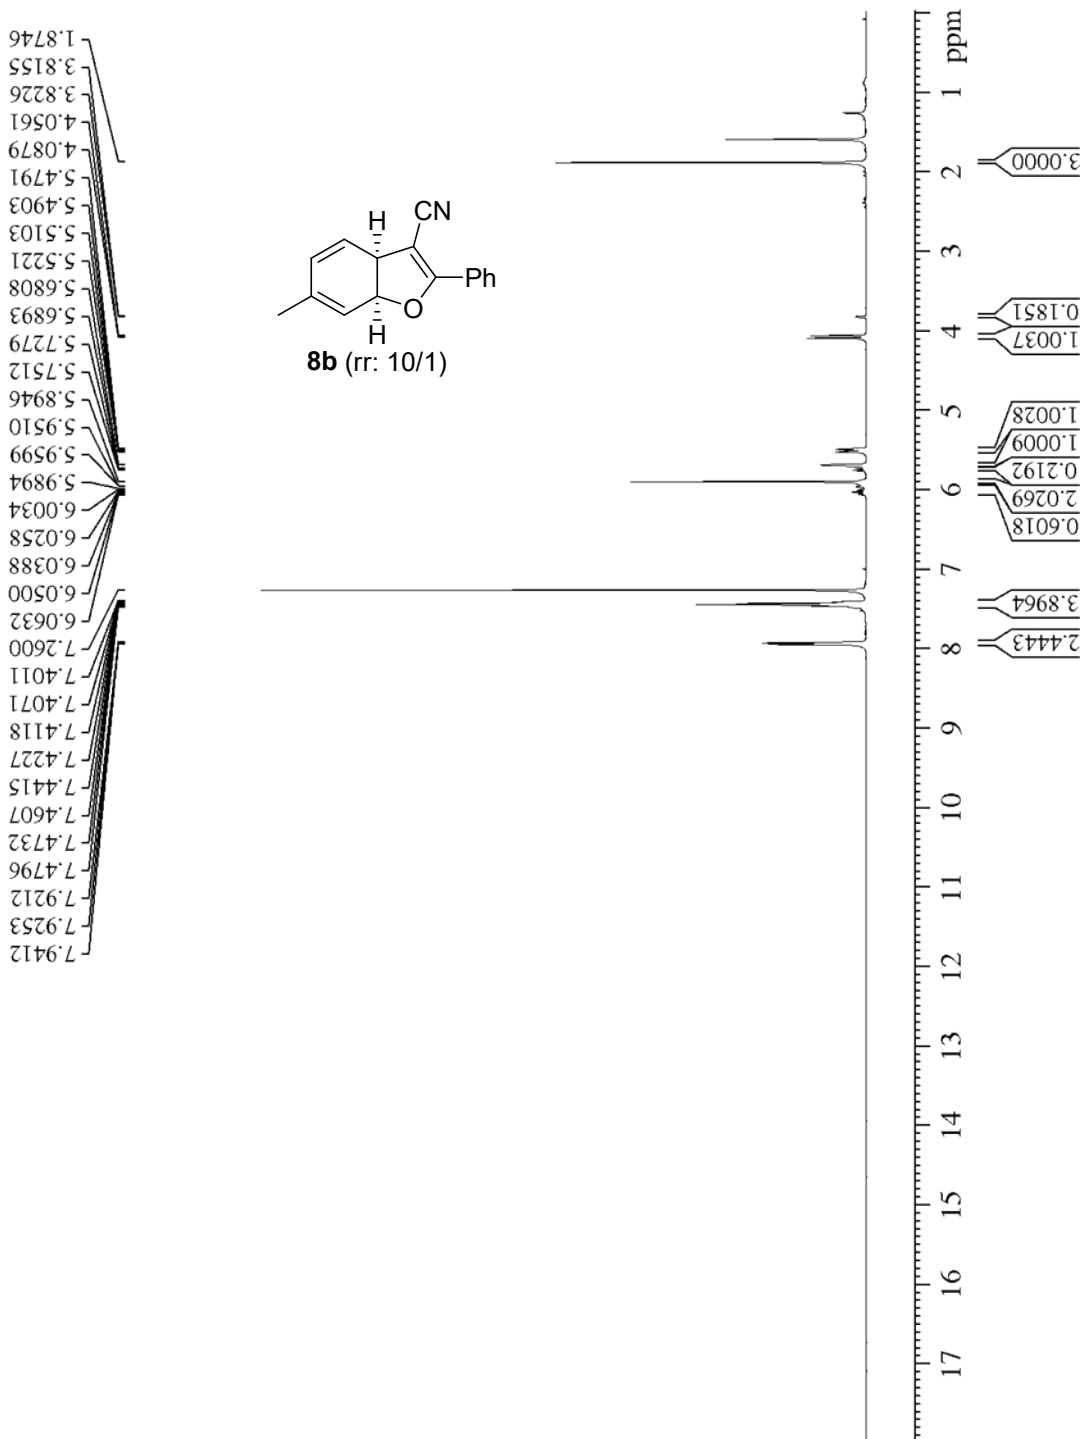

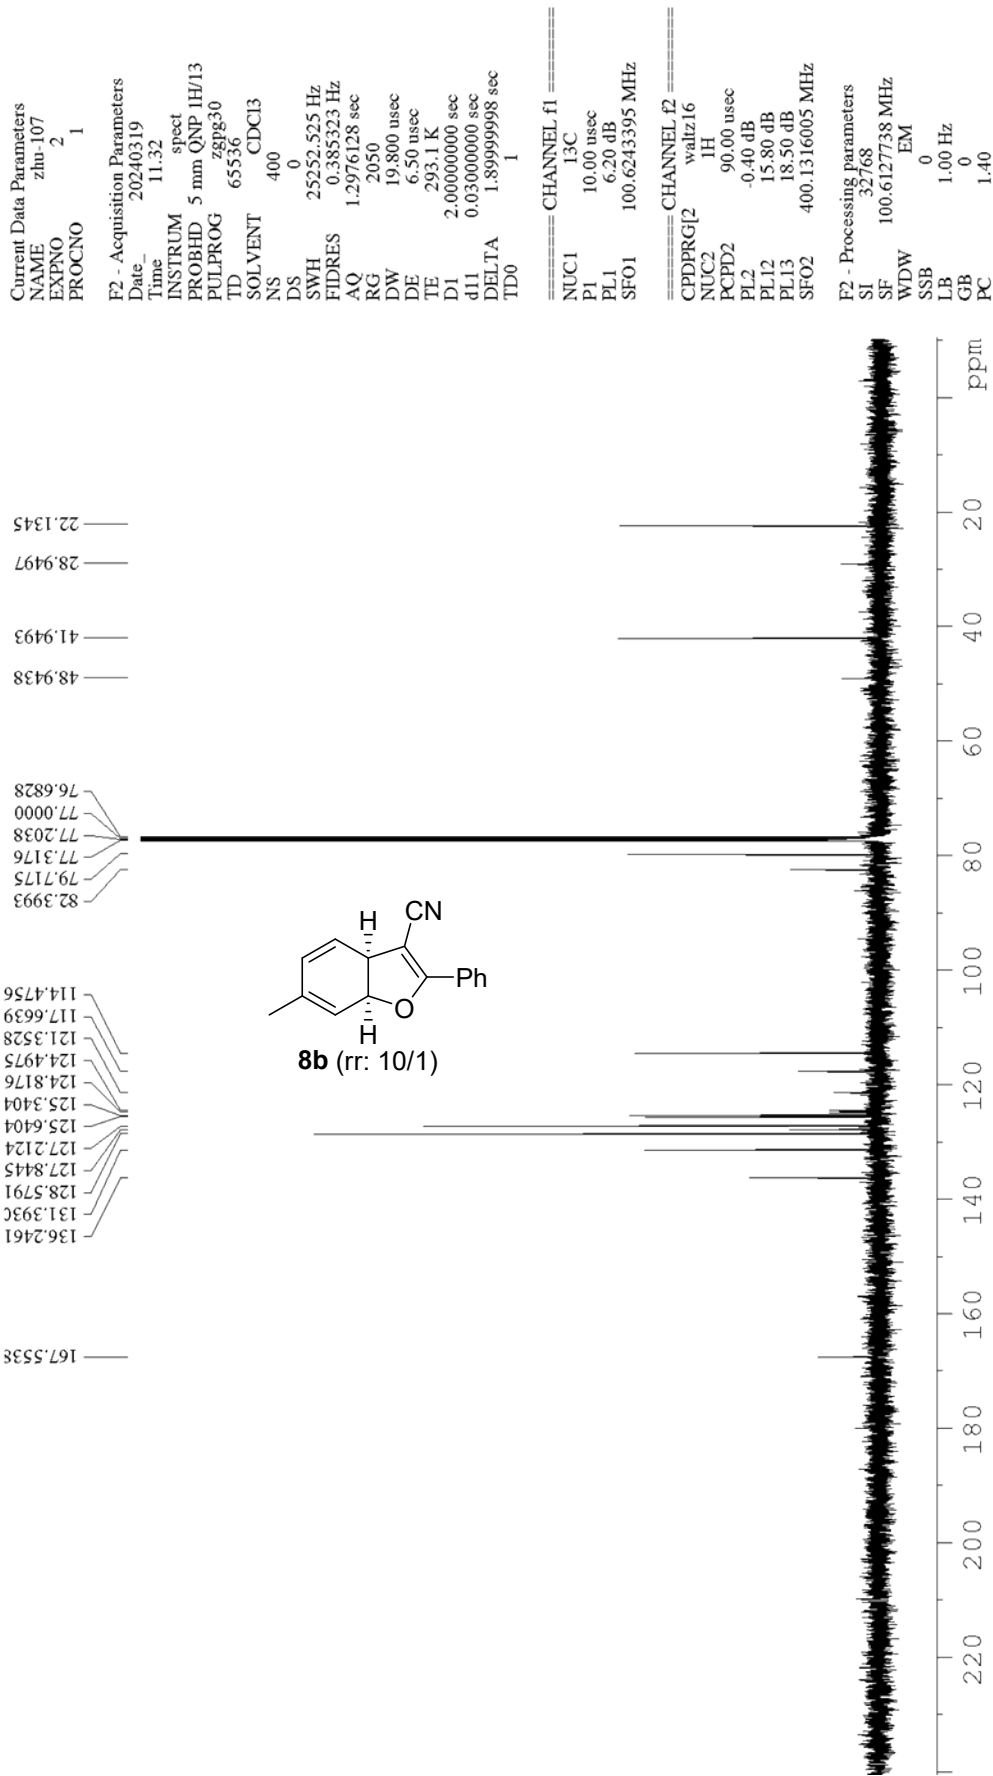

### iii) Formation of **8c** and <sup>1</sup>H-NMR <sup>13</sup>C-NMR, DEPT spectra

*Cis*-2-Methyl-3a,7a-dihydrobenzofuran-3-carbonitrile (**8c**)

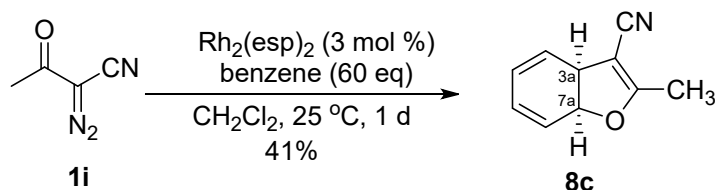

The titled compound was synthesized from **1i** ( $R_f = 0.3$ ; hexane/ethyl acetate = 20:1) and benzene following the procedure for the preparation of **8a**. The reaction mixture was stirred at ambient temperature for 24 h until TLC showed the complete conversion of initially formed norcaradiene ( $R_f = 0.32$ ; hexane/ethyl acetate = 20:1) into **8c** ( $R_f = 0.45$ ). After concentration, the crude residue was subjected to chromatography (basic aluminium oxide; hexane/ethyl acetate = 40:1) to provide **8c** as a colorless oil in 41% yield. <sup>1</sup>H NMR (400 MHz, CDCl<sub>3</sub>)  $\delta$  6.14 (dd,  $J = 9.5, 5.1$  Hz, 1 H), 5.98-5.93 (m, 1 H), 5.84-5.79 (m, 2 H), 5.42 (dd,  $J = 13.2, 4.7$  Hz, 1 H, H-7a), 4.00 (dm,  $J = 13.2$  Hz, 1 H, H-3a), 2.07 (s, 3 H, CH<sub>3</sub>) ppm; <sup>13</sup>C NMR (100 MHz, CDCl<sub>3</sub>)  $\delta$  171.3 (C-2), 127.2, 125.4, 121.0, 119.5, 116.6 (CN), 85.4 (C-3), 79.6 (C-7a), 41.0 (C-3a), 13.6 (CH<sub>3</sub>) ppm; HRMS-EI:  $m/z$  [M]<sup>+</sup> calcd. for C<sub>10</sub>H<sub>9</sub>NO: 159.0684; found: 159.0681.

Current Data Parameters  
 NAME zhu-48-1  
 EXPNO 1  
 PROCNO 1

F2 - Acquisition Parameters  
 Date\_ 20230316  
 Time 13.41  
 INSTRUM spect  
 PROBHD 5 mm QNP 1H/13  
 PULPROG zg30  
 TD 32768  
 SOLVENT CDCl3  
 NS 160  
 DS 0  
 SWH 7211.539 Hz  
 FIDRES 0.220079 Hz  
 AQ 2.2719147 sec  
 RG 512  
 DW 69.333 usec  
 DE 6.50 usec  
 TE 292.3 K  
 D1 2.00000000 sec  
 TD0 1

===== CHANNEL f1 =====  
 NUC1 1H  
 P1 15.00 usec  
 PL1 0.90 dB  
 SFO1 400.1336012 MHz

F2 - Processing parameters  
 SI 16384  
 SF 400.1300096 MHz  
 WDW EM  
 SSB 0  
 LB 0.30 Hz  
 GB 0  
 PC 1.00

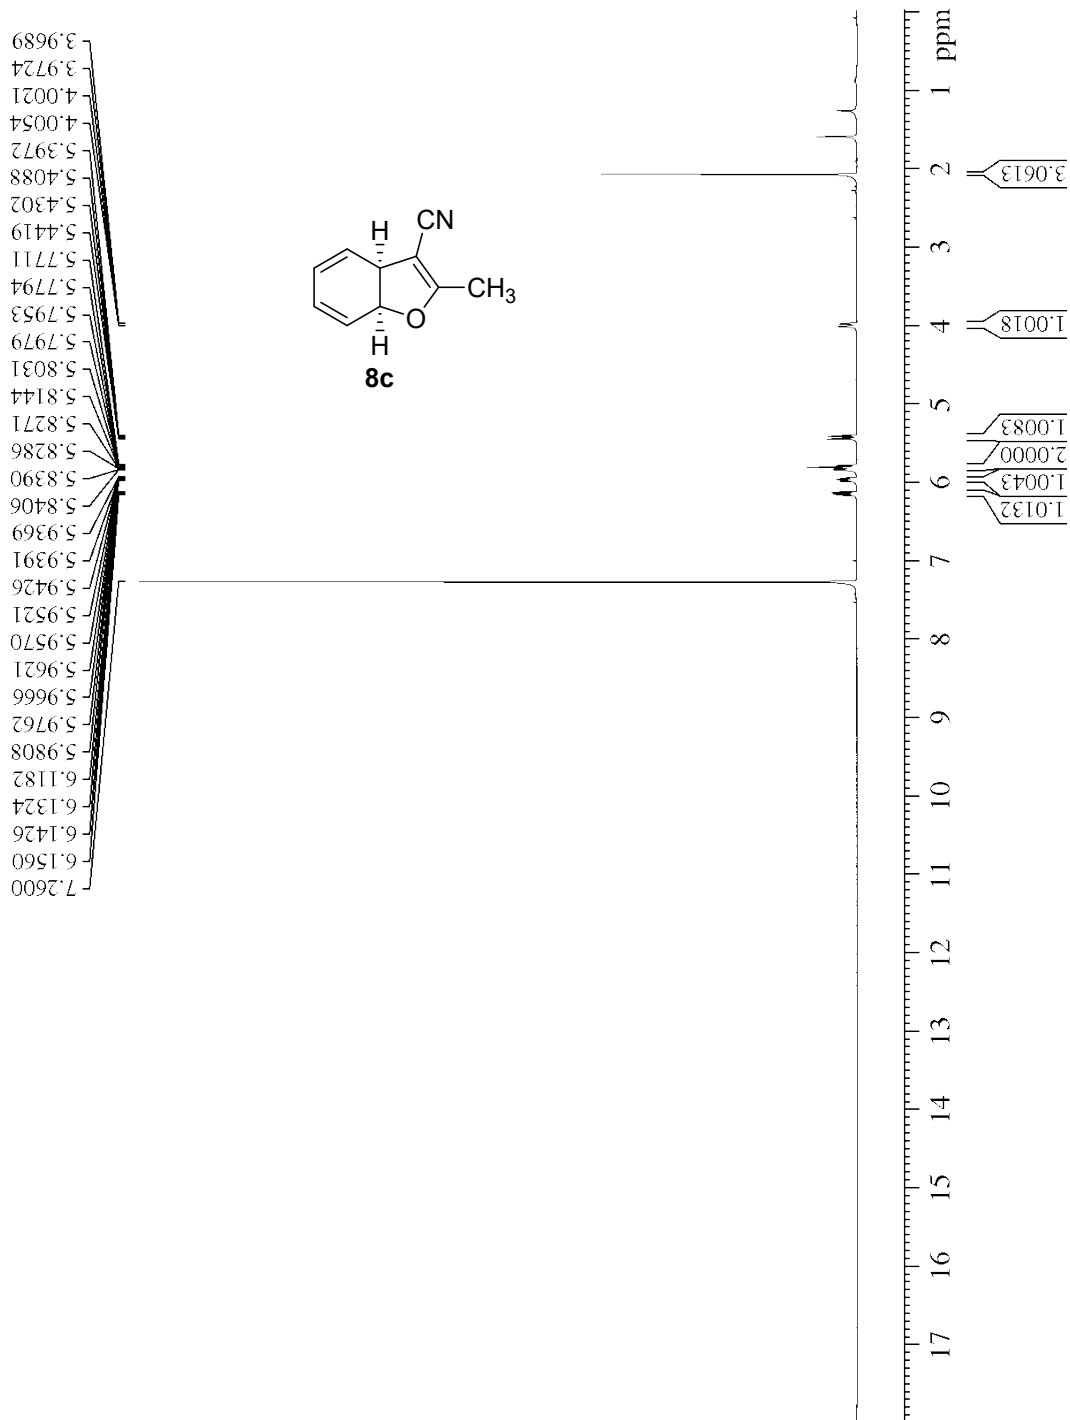

Current Data Parameters  
 NAME zhu-48-1  
 EXPNO 4  
 PROCNO 1

F2 - Acquisition Parameters  
 Date\_ 20230321  
 Time 22.28  
 INSTRUM spect  
 PROBHHD 5 mm QNP IH/13  
 PULPROG zgpg30  
 TD 65536  
 SOLVENT CDCl3  
 NS 2400  
 DS 0  
 SWH 25252.525 Hz  
 FIDRES 0.385323 Hz  
 AQ 1.2976128 sec  
 RG 1820  
 DW 19.800 usec  
 DE 6.50 usec  
 TE 293.1 K  
 D1 2.00000000 sec  
 d11 0.03000000 sec  
 DELTA 1.89999998 sec  
 TD0 1

==== CHANNEL f1 =====  
 NUC1 13C  
 P1 10.00 usec  
 PL1 6.20 dB  
 SFO1 100.6243395 MHz

==== CHANNEL f2 =====  
 CPDPRG2 waltz16  
 NUC2 1H  
 PCPD2 90.00 usec  
 PL2 -0.40 dB  
 PL12 15.80 dB  
 PL13 18.50 dB  
 SFO2 400.1316005 MHz

F2 - Processing parameters  
 SI 32768  
 SF 100.612727 MHz  
 WDW EM  
 SSB 0  
 LB 1.00 Hz  
 GB 0  
 PC 1.40

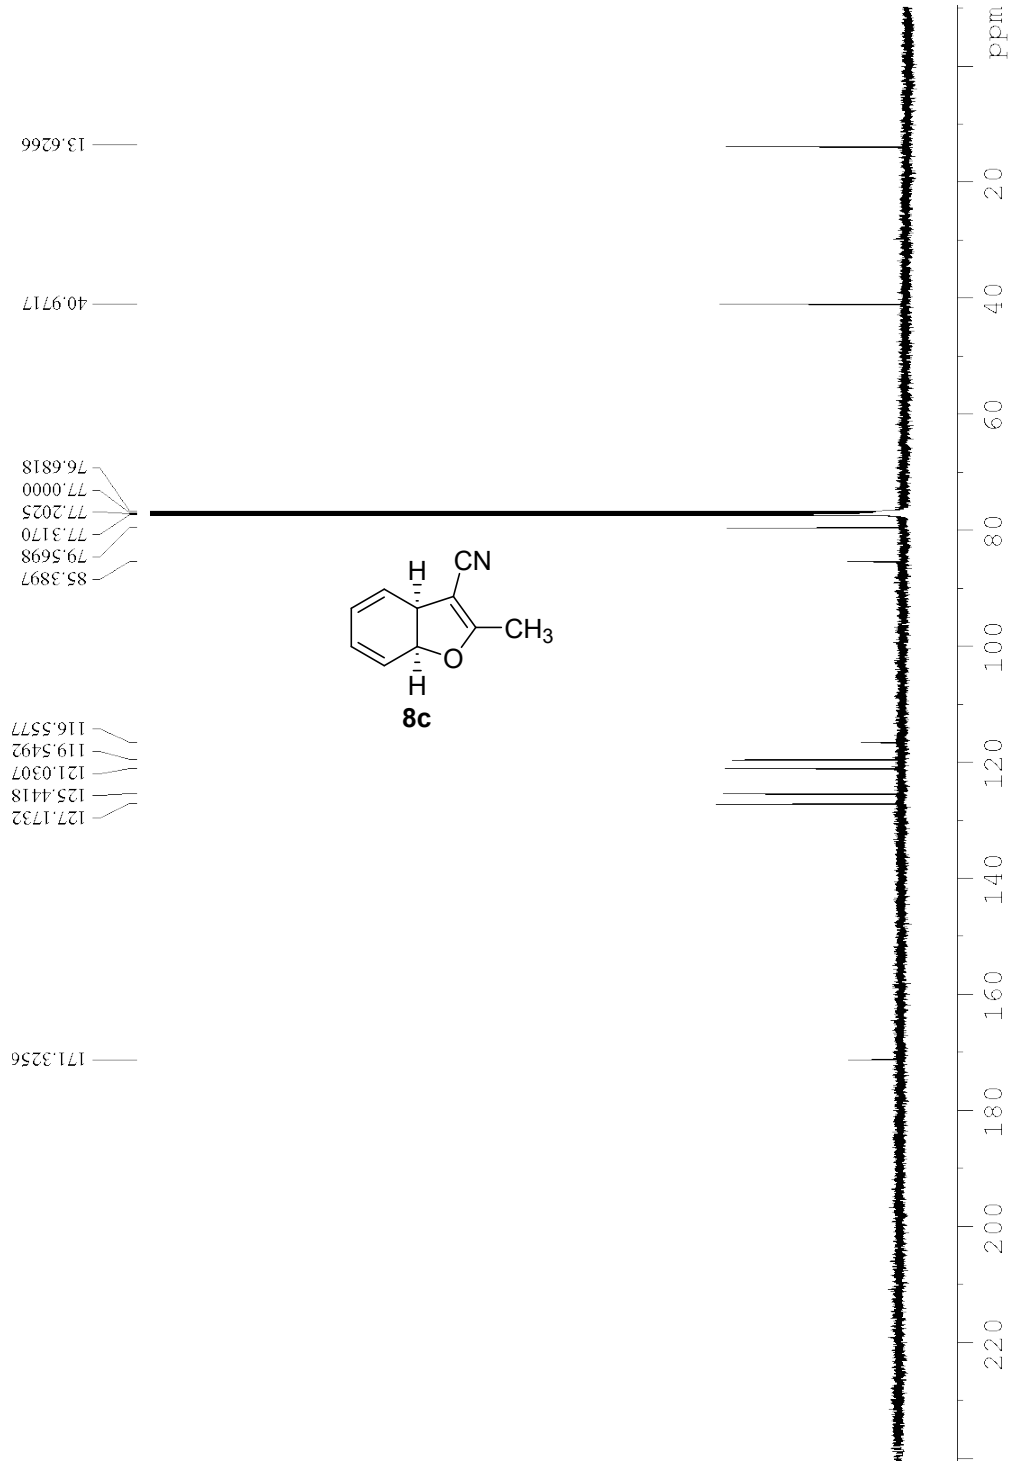

DEPT 135, 90 and  $^{13}\text{C}$  NMR spectra (100 MHz in  $\text{CDCl}_3$ ):

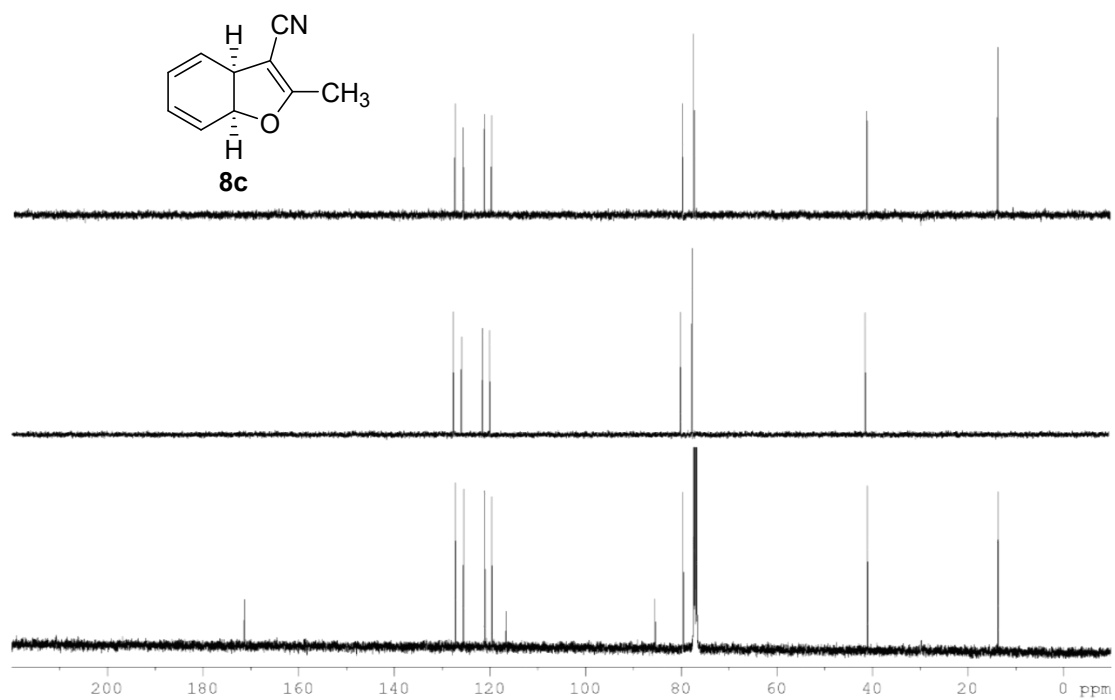

## 10) $^1\text{H}$ NMR Analysis of the Reaction of **1h** with Benzene

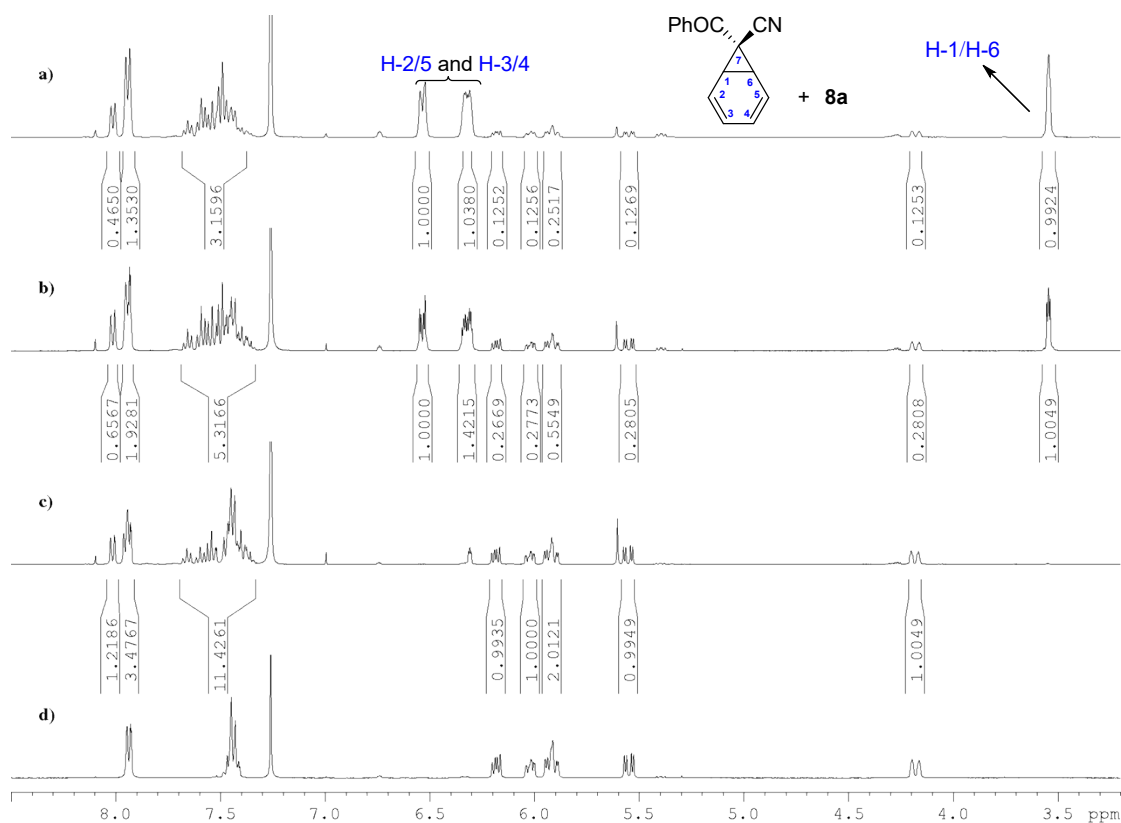

$^1\text{H}$  NMR analysis ( $\text{CDCl}_3$ , 400 MHz) to indicate the spontaneous conversion of norcaradiene intermediate to **8a** in the absence of the catalyst:

- Reaction mixture after proceeding for 15 min followed by filtration over a  $\text{Al}_2\text{O}_3$  pad to remove  $\text{Rh}_2(\text{esp})_2$  catalyst (norcaradiene /**8a** = 80/20).
- After stirring the mixture from **a**) in DCM for 10 h (norcaradiene /**8a** = 65/35).
- After stirring the mixture from **a**) in DCM for 20 h (norcaradiene /**8a** = 0/100).
- $^1\text{H}$  NMR spectrum of **8a**.



### 11) Conversion of **8a** into **9** and <sup>1</sup>H-NMR, <sup>13</sup>C-NMR spectra

3-Oxo-2,3-diphenylpropanenitrile (**9**)<sup>15</sup>

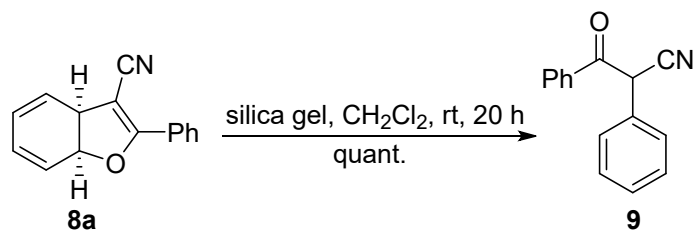

To a solution of **8a** (41 mg, 0.185 mmol) in CH<sub>2</sub>Cl<sub>2</sub> (4 ml), 40 mg of silica gel (70-230 mesh) was added. The suspension was stirred at ambient temperature for 20 h, then filtrated through a cotton pad and concentrated in vacuo to give 40 mg of **9** as a white solid. <sup>1</sup>H NMR (400 MHz, CDCl<sub>3</sub>) δ 7.95 (br d, *J* = 7.4 Hz, 2 H), 7.60 (br t, *J* = 7.4 Hz, 1 H), 7.58-7.34 (m, 7 H), 5.60 (s, 1 H) ppm; <sup>13</sup>C NMR (100 MHz, CDCl<sub>3</sub>) δ 188.8 (C=O), 134.4, 133.6, 130.3, 129.7, 129.3, 129.1, 129.0, 128.2, 116.5 (CN), 46.7 ppm.

Current Data Parameters  
 NAME Zhu-56 TLC overnight  
 EXPNO 1  
 PROCNO 1

F2 - Acquisition Parameters

Date\_ 20230502  
 Time 23.39  
 INSTRUM spect  
 PROBHD 5 mm QNP 1H/13  
 PULPROG zg30  
 TD 32768  
 SOLVENT CDCl3  
 NS 160  
 DS 0  
 SWH 7211.539 Hz  
 FIDRES 0.220079 Hz  
 AQ 2.2719147 sec  
 RG 406  
 DW 69.333 usec  
 DE 6.50 usec  
 TE 292.5 K  
 D1 2.00000000 sec  
 TD0 1

==== CHANNEL f1 =====

NUC1 1H  
 P1 15.00 usec  
 PL1 0.90 dB  
 SFO1 400.1336012 MHz

F2 - Processing parameters

SI 16384  
 SF 400.1300092 MHz  
 WDW EM  
 SSB 0  
 LB 0.30 Hz  
 GB 0  
 PC 1.00

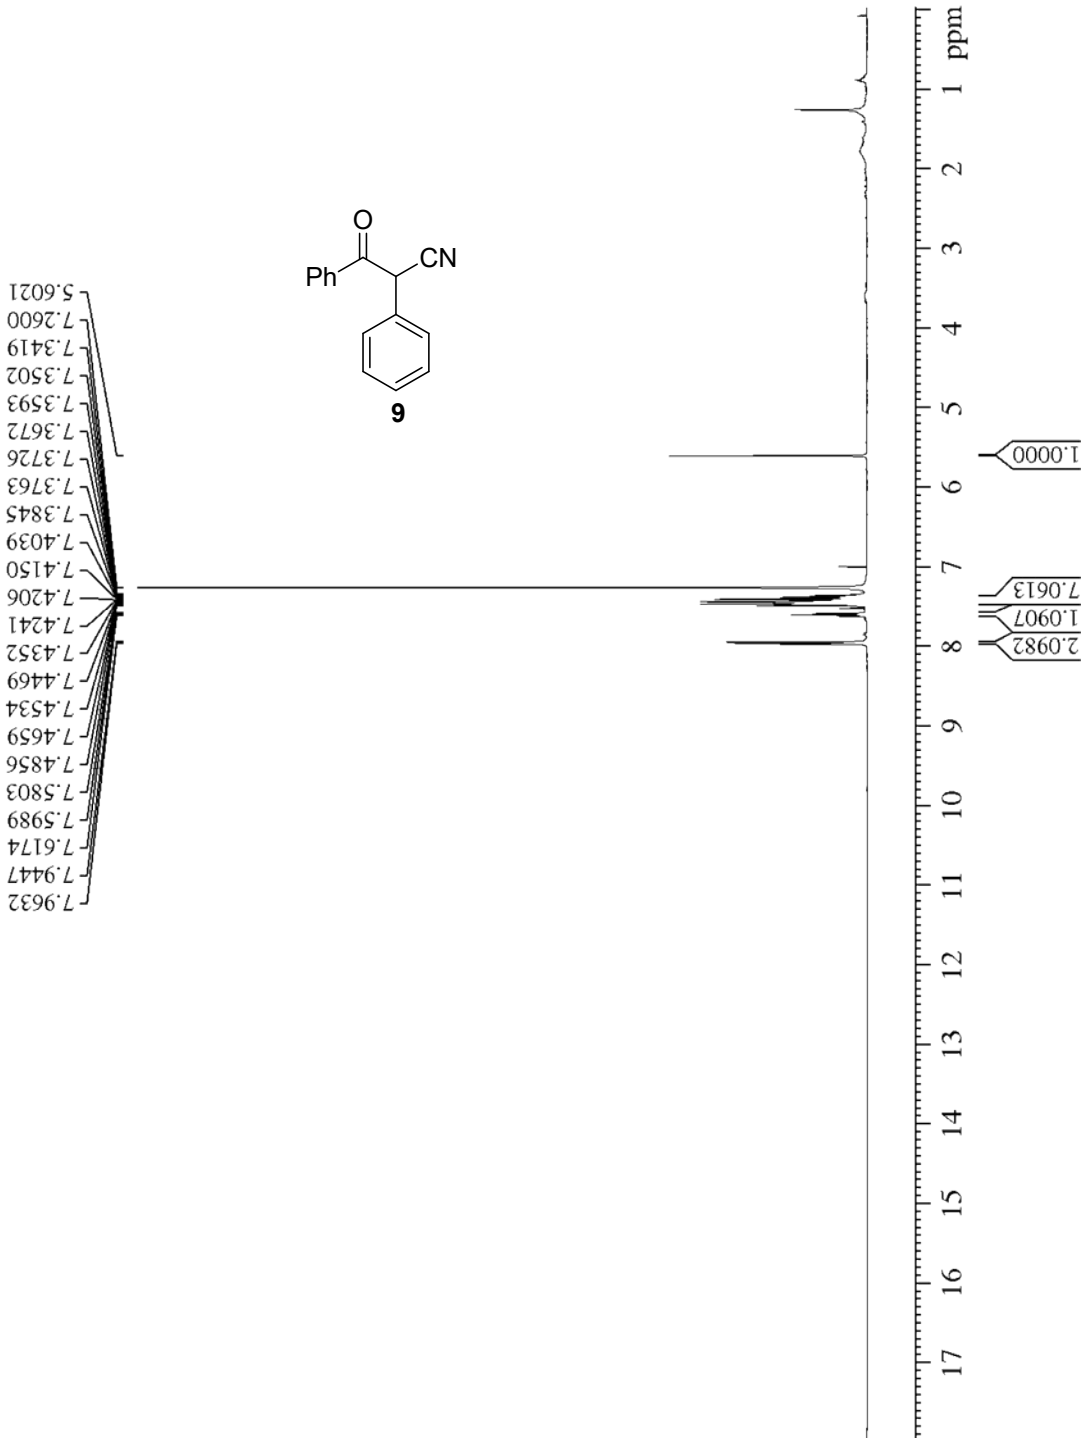

Current Data Parameters  
 NAME Zhu-56 TLC overnight  
 EXPNO 2  
 PROCNO 1

F2 - Acquisition Parameters  
 Date\_ 20230502  
 Time 23.56  
 INSTRUM spect  
 PROBHD 5 mm QNP 1H/13  
 PULPROG zgpg30  
 TD 65536  
 SOLVENT CDCl3  
 NS 9140  
 DS 0  
 SWH 25252.525 Hz  
 FIDRES 0.385323 Hz  
 AQ 1.2976128 sec  
 RG 2050  
 DW 19.800 usec  
 DE 6.50 usec  
 TE 292.9 K  
 D1 2.00000000 sec  
 d11 0.03000000 sec  
 DELTA 1.89999998 sec  
 TD0 1

==== CHANNEL f1 =====  
 NUC1 13C  
 P1 10.00 usec  
 PL1 6.20 dB  
 SFO1 100.6243395 MHz

==== CHANNEL f2 =====  
 CPDPRG2 waltz16  
 NUC2 1H  
 PCPD2 90.00 usec  
 PL2 -0.40 dB  
 PL12 15.80 dB  
 PL13 18.50 dB  
 SFO2 400.1316005 MHz

F2 - Processing parameters  
 SI 32768  
 SF 100.6127735 MHz  
 WDW EM  
 SSB 0  
 LB 1.00 Hz  
 GB 0  
 PC 1.40

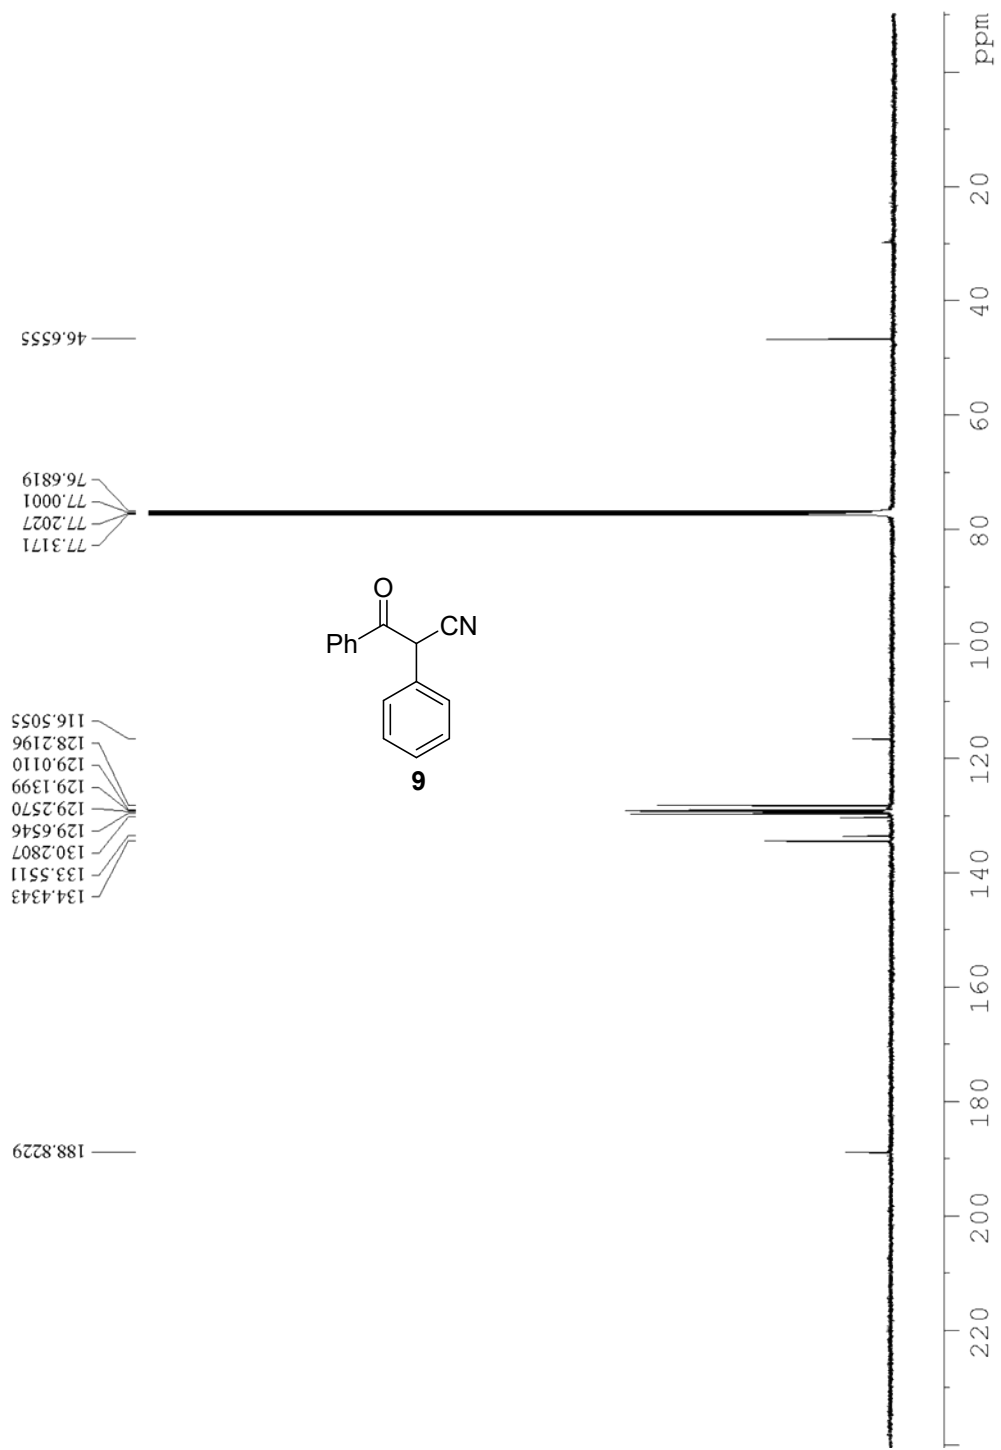

## 12) Oxidation of **8a/8b** into **10a/10b** and $^1\text{H}$ -NMR, $^{13}\text{C}$ -NMR spectra

### 2-Phenylbenzofuran-3-carbonitrile (**10a**)<sup>16</sup>

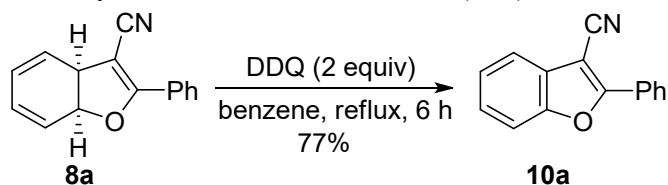

DDQ (63.6 mg, 0.28 mmol) was added to a flask containing a solution of **8a** (31 mg, 0.14 mmol) in benzene (5 mL). The mixture was stirred and refluxed in an oil bath (90 °C) for 6 h before cooling to room temperature and concentration under reduced pressure. The crude residue was purified by chromatography (silica gel; hexane/ethyl acetate = 60:1) to give **10a** as a white solid (23.6 mg, 77%).  $^1\text{H}$  NMR (400 MHz,  $\text{CDCl}_3$ )  $\delta$  8.20 (dd,  $J$  = 6.9, 1.9 Hz, 2 H), 7.73-7.71 (m, 1 H), 7.59-7.54 (m, 4 H), 7.50-7.37 (m, 2 H) ppm;  $^{13}\text{C}$  NMR (100 MHz,  $\text{CDCl}_3$ )  $\delta$  161.7, 153.3, 131.2, 129.2, 127.8, 127.2, 126.5, 126.4, 124.7, 119.9, 114.3, 111.7, 88.1 ppm.

### 6-Methyl-2-phenylbenzofuran-3-carbonitrile (**10b**)<sup>16</sup>

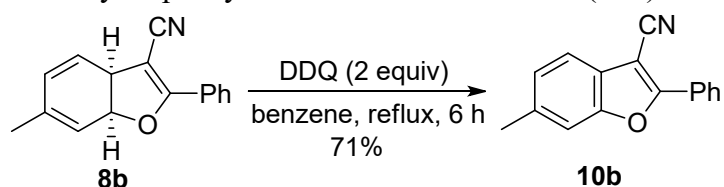

The titled compound was synthesized from **8b** following the procedure for the preparation of **10a**. **8b** was used as a 10:1 regioisomeric mixture, while only **10b** derived from the major isomer was obtained in 71% yield after chromatographic purification (silica gel; hexane/ethyl acetate = 60:1).  $^1\text{H}$  NMR (400 MHz,  $\text{CDCl}_3$ )  $\delta$  8.18 (br d,  $J$  = 6.8 Hz, 2 H), 7.60-7.56 (m, 4 H), 7.49 (br s, 1 H), 7.26-7.20 (m, 1 H), 2.52 (s, 3 H) ppm;  $^{13}\text{C}$  NMR (100 MHz,  $\text{CDCl}_3$ )  $\delta$  161.2, 153.8, 137.1, 131.0, 129.2, 128.0, 126.4, 126.1, 124.7, 119.4, 114.6, 111.9, 88.0, 21.8 ppm.

Current Data Parameters  
 NAME zhu-88  
 EXPNO 1  
 PROCNO 1

F2 - Acquisition Parameters  
 Date\_ 20230912  
 Time 22.15  
 INSTRUM spect  
 PROBHD 5 mm QNP 1H/13  
 PULPROG zg30  
 TD 32768  
 SOLVENT CDC13  
 NS 160  
 DS 0  
 SWH 7211.539 Hz  
 FIDRES 0.220079 Hz  
 AQ 2.2719147 sec  
 RG 322  
 DW 69.333 usec  
 DE 6.50 usec  
 TE 293.5 K  
 D1 2.00000000 sec  
 TD0 1

==== CHANNEL f1 =====  
 NUC1 1H  
 P1 15.00 usec  
 PL1 0.90 dB  
 SFO1 400.1336012 MHz

F2 - Processing parameters  
 SI 16384  
 SF 400.1300092 MHz  
 WDW EM  
 SSB 0  
 LB 0.30 Hz  
 GB 0  
 PC 1.00

8.2133  
8.2084  
8.1928  
8.1894  
7.7331  
7.7312  
7.7285  
7.7160  
7.7118  
7.5954  
7.5923  
7.5776  
7.5735  
7.5659  
7.5555  
7.5412  
7.5364  
7.5322  
7.5219  
7.5195  
7.5063  
7.5021  
7.4482  
7.4447  
7.4302  
7.4262  
7.4116  
7.4071  
7.3930  
7.3899  
7.3744  
7.3719  
7.2600

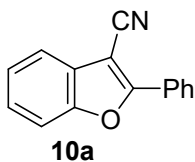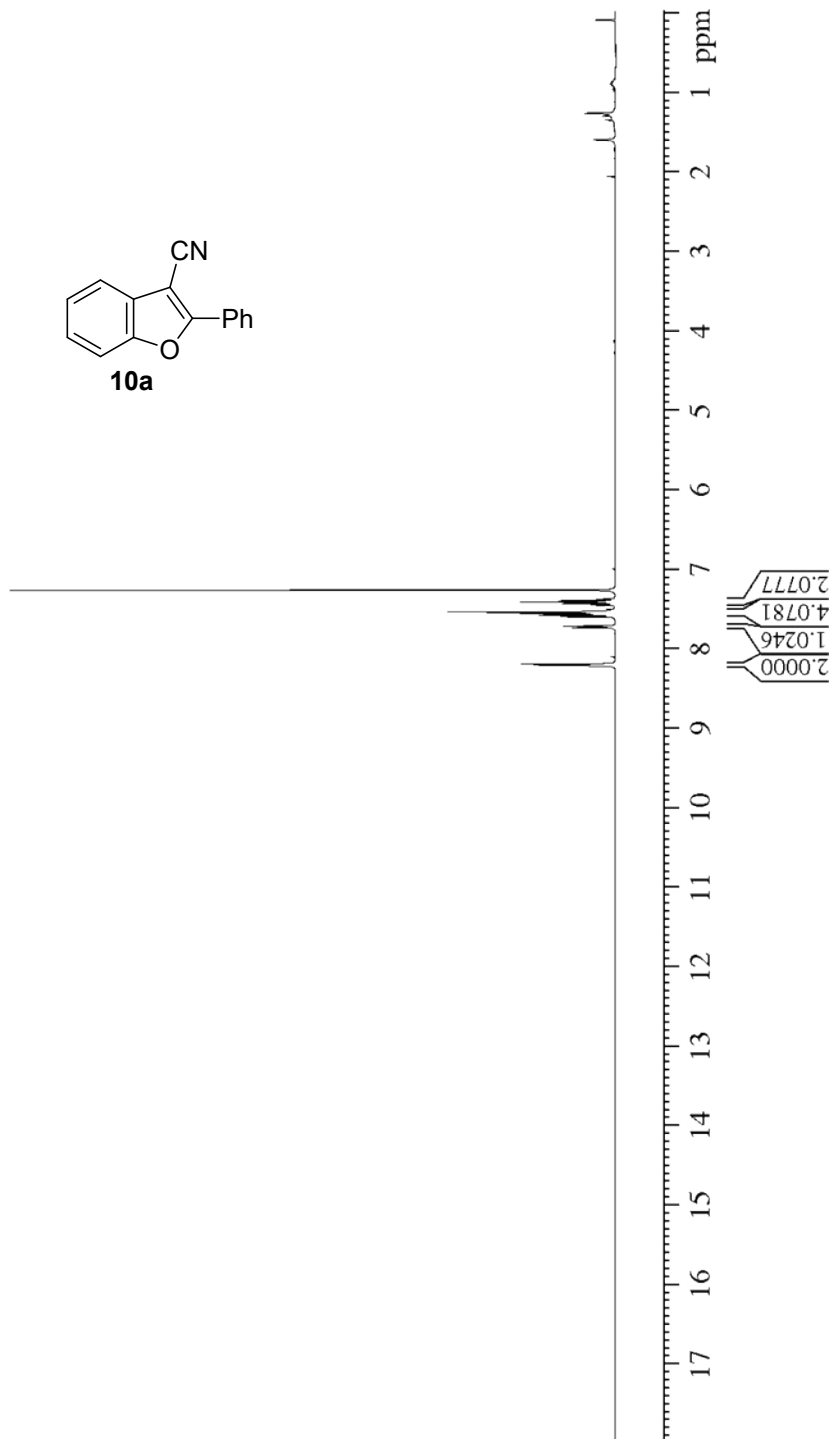

Current Data Parameters  
 NAME zhu-88  
 EXPNO 2  
 PROCNO 1

F2 - Acquisition Parameters  
 Date\_ 20230912  
 Time 22.32  
 INSTRUM spect  
 PROBHD 5 mm QNP 1H/13  
 PULPROG zgpg30  
 TD 65536  
 SOLVENT CDCl3  
 NS 10522  
 DS 0  
 SWH 25252.525 Hz  
 FIDRES 0.385323 Hz  
 AQ 1.2976128 sec  
 RG 2050  
 DW 19.800 usec  
 DE 6.50 usec  
 TE 293.7 K  
 D1 2.00000000 sec  
 d11 0.03000000 sec  
 DELTA 1.89999998 sec  
 TD0 1

==== CHANNEL f1 =====  
 NUC1 13C  
 P1 10.00 usec  
 PL1 6.20 dB  
 SFO1 100.6243395 MHz

==== CHANNEL f2 =====  
 CPDPRG[2] waltz16  
 NUC2 1H  
 PCPD2 90.00 usec  
 PL2 -0.40 dB  
 PL12 15.80 dB  
 PL13 18.50 dB  
 SFO2 400.1316005 MHz

F2 - Processing parameters  
 SI 32768  
 SF 100.6127744 MHz  
 WDW EM  
 SSB 0  
 LB 1.00 Hz  
 GB 0  
 PC 1.40

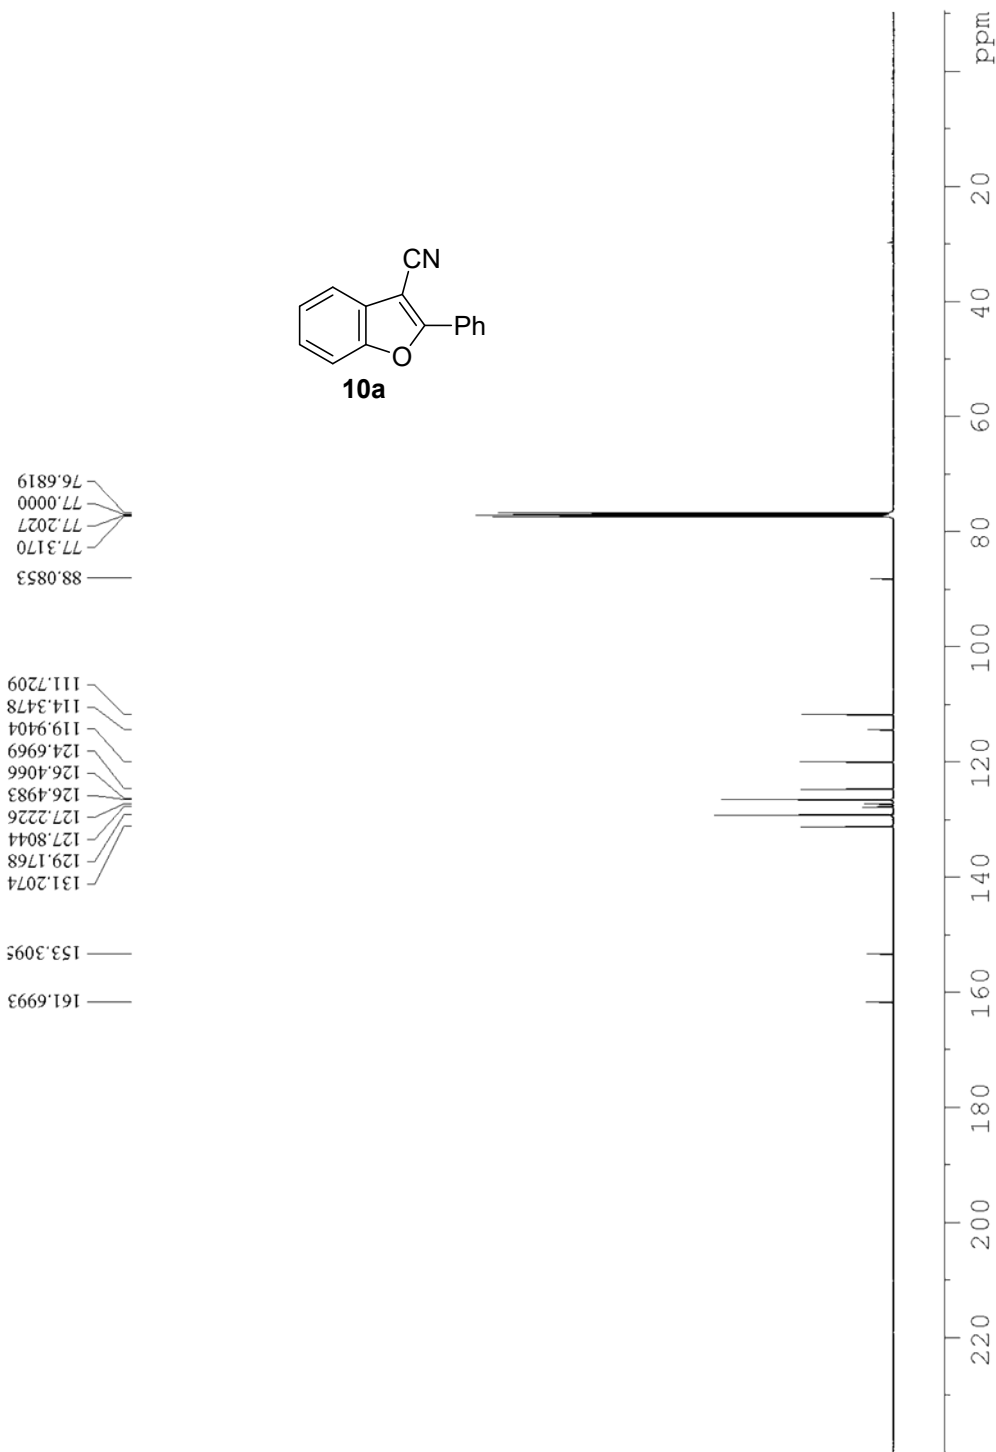

Current Data Parameters  
NAME zhu-108 overnight  
EXPNO 1  
PROCNO 1

F2 - Acquisition Parameters  
Date\_ 20240324  
Time 22.04  
INSTRUM spect  
PROBHD 5 mm QNP 1H/13  
PULPROG zg30  
TD 32768  
SOLVENT CDCI3  
NS 160  
DS 0  
SWH 7211.539 Hz  
FIDRES 0.220079 Hz  
AQ 2.2719147 sec  
RG 724  
DW 69.333 usec  
DE 6.50 usec  
TE 292.6 K  
D1 2.00000000 sec  
TD0 1

==== CHANNEL f1 =====  
NUC1 1H  
P1 15.00 usec  
PL1 0.90 dB  
SFO1 400.1336012 MHz

F2 - Processing parameters  
SI 16384  
SF 400.1300092 MHz  
WDW EM  
SSB 0  
LB 0.30 Hz  
GB 0  
PC 1.00

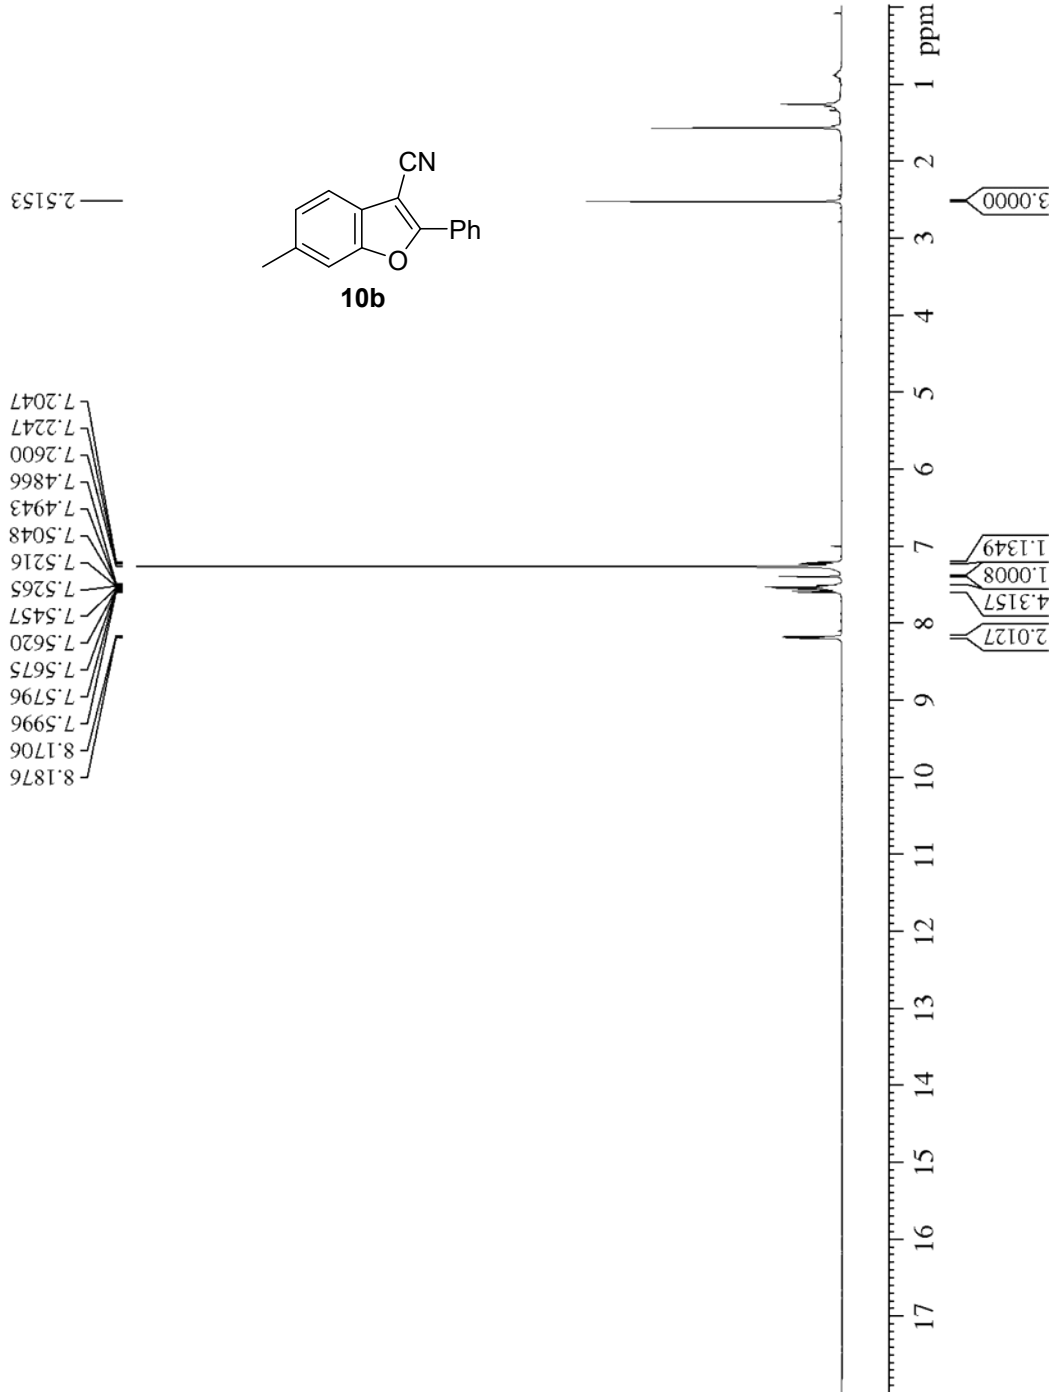

Current Data Parameters  
 NAME zhu-108 overnight  
 EXPNO 2  
 PROCNO 1

F2 - Acquisition Parameters  
 Date\_ 20240324  
 Time 22.18  
 INSTRUM spect  
 PROBHD 5 mm QNP 1H/13  
 PULPROG zgpg30  
 TD 65536  
 SOLVENT CDCl3  
 NS 10564  
 DS 0  
 SWH 25252.525 Hz  
 FIDRES 0.385323 Hz  
 AQ 1.2976128 sec  
 RG 2050  
 DW 19.800 usec  
 DE 6.50 usec  
 TE 292.8 K  
 D1 2.00000000 sec  
 d11 0.03000000 sec  
 DELTA 1.89999998 sec  
 TD0 1

==== CHANNEL f1 =====  
 NUC1 13C  
 P1 10.00 usec  
 PL1 6.20 dB  
 SFO1 100.6243395 MHz

==== CHANNEL f2 =====  
 CPDPRG2 waltz16  
 NUC2 1H  
 PCPD2 90.00 usec  
 PL2 -0.40 dB  
 PL12 15.80 dB  
 PL13 18.50 dB  
 SFO2 400.1316005 MHz

F2 - Processing parameters  
 SI 32768  
 SF 100.6127721 MHz  
 WDW EM  
 SSB 0  
 LB 1.00 Hz  
 GB 0  
 PC 1.40

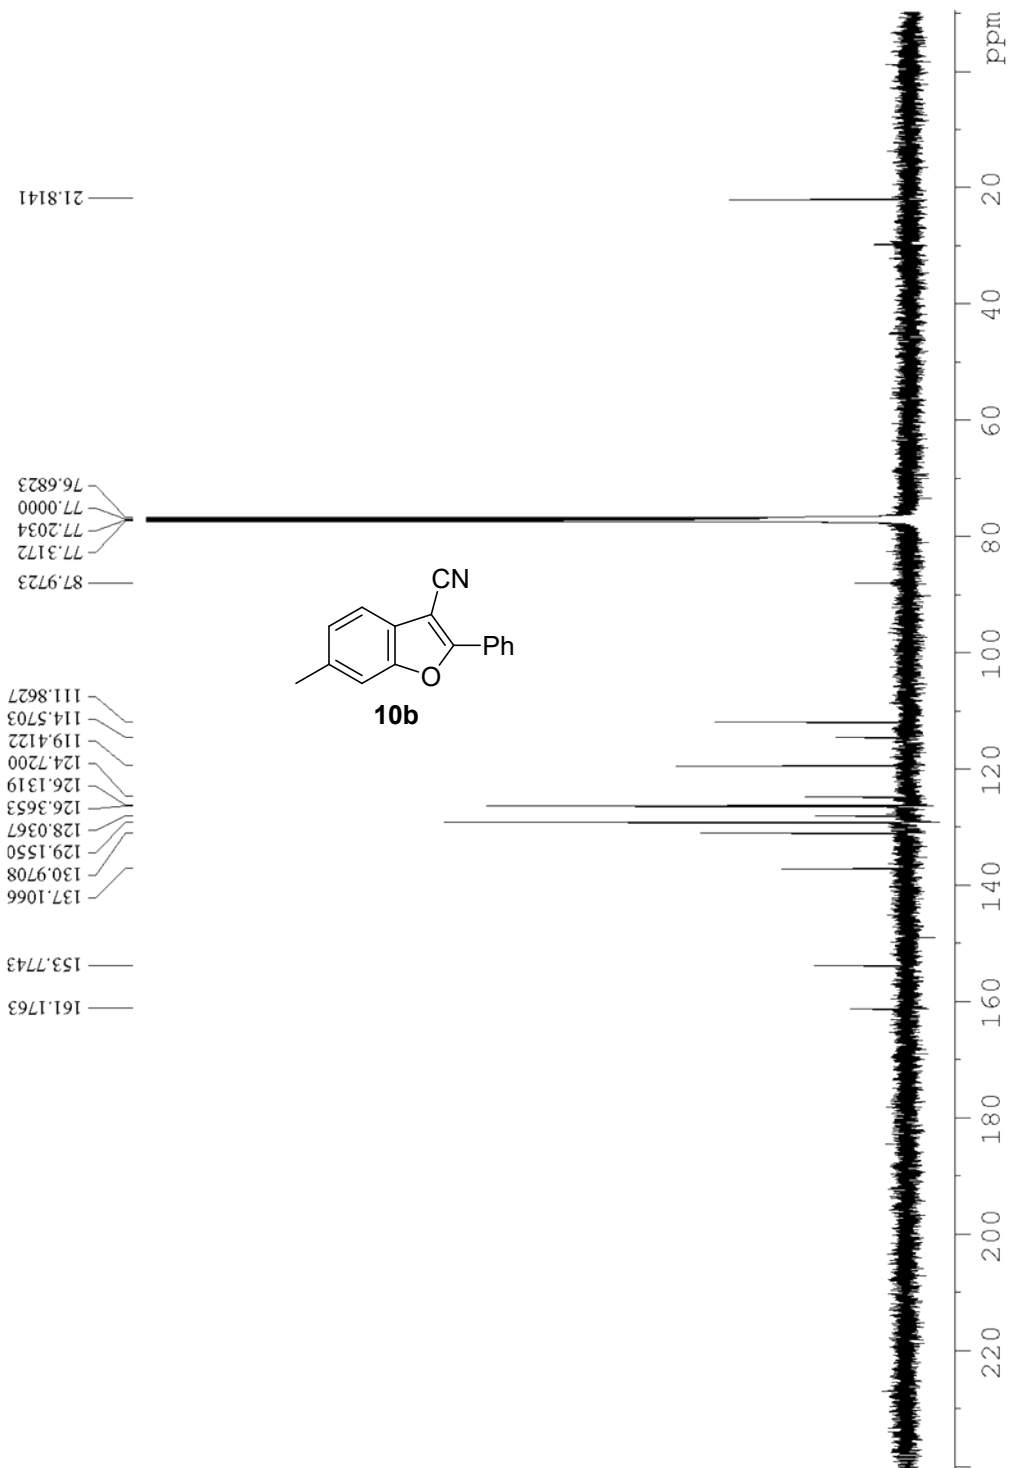



## References

1. Y.-T. Tsai and J.-L. Zhu, *J. Mol. Struct.* 2023, **1274**, 134521.
2. D. Dar'in, G. Kantin and M. Krasavin, *Chem. Commun.*, 2019, **55**, 5239-5242.
3. K. J. Doyle and C. J. Moody, *Tetrahedron*, 1994, **50**, 3761-3772.
4. M. Nahmany and A. Melmar, *Org. Lett.*, 2001, **23**, 3733-3735.
5. J. Shen, D. Yang, Y. Liu, S. Qin, J. Zhang, J. Sun, C. Liu, C. Liu, X. Zhao, C. Chu and R. Liu, *Org. Lett.*, 2014, **16**, 350-353.
6. G. L'abbé and P. Godts, *Bull. Soc. Chim. Belg.*, 1987, **96**, 229-236.
7. Y.-J. Chiang and J.-L. Zhu, *Tetrahedron Lett.*, 2017, **58**, 3081-3084.
8. E. Ciganek, *J. Am. Chem. Soc.*, 1971, **93**, 2207-2215.
9. K. L. Smith, C. L. Padgett, W. D. Mackay and J. S. Johnson, *J. Am. Chem. Soc.*, 2020, **142**, 6449-6455.
10. Y.-P. Lam, Z. Lam and Y.-Y. Yeung, *J. Org. Chem.*, 2021, **86**, 1183-1190.
11. N. Kaplaneris, A. Bisticha, G. N. Papadopoulos, D. Limnios and C. G. Kokotos, *Green Chem.*, 2017, **19**, 4451-4456.
12. M. M. Sá, M. M. Peterle and M. V. Marques, *J. Braz. Chem. Soc.*, 2019, **30**, 1779-1787.
13. Y.-J. Chiang and J.-L. Zhu, *Tetrahedron Lett.*, 2017, **58**, 3081-3084.
14. Y. Yu, Q. Sha, H. Cui, K. S. Chandler and M. P. Doyle, *Org. Lett.*, 2018, **20**, 776-779.
15. Y. Ji, W. C. Trenkle and J. V. Vowles, *Org. Lett.*, 2006, **8**, 1161-1163.
16. W. Zhou, Y. Zhang, P. Lia and L. Wang, *Org. Biomol. Chem.*, 2012, **10**, 7184-7196.
